# Supplementary material for: Sub-micron thick liquid sheets produced by isotropically etched glass nozzles
Source: Royal Society of Chemistry journal article supplement (doi:10.1039/d1lc00757b), 2022-01-01
Supplement: d1lc00757b2.xlsx [file d1lc00757b2.xlsx]

## Sheet: R2 Values
Evaluate Error - Plug in Values Below																	C02						B06						C04						B01						A04						A06
Q	3.75	[mL/min]															Q	3.75	[mL/min]				Q	2.65	[mL/min]				Q	2.65	[mL/min]				Q	4.3	[mL/min]				Q	3.2	[mL/min]				Q	3.2	[mL/min]
w0	141.61	[um]															w0	141.61	[um]	0.985954			w0	76.46	[um]	0.988085			w0	137.68	[um]	0.997135			w0	144	[um]	0.993637			w0	81.8	[um]	0.976688			w0	95.36	[um]
d	16.71	[um]															d	16.71	[um]				d	17.16	[um]				d	16.22	[um]				d	16	[um]				d	18.18	[um]				d	16.68	[um]
x1	0.91	[mm]															x1	0.91	[mm]				x1	0.71	[mm]				x1	0.76	[mm]				x1	0.89	[mm]				x1	0.5	[mm]				x1	0.6	[mm]
x2	1.21	[mm]															x2	1.21	[mm]				x2	0.79	[mm]				x2	0.84	[mm]				x2	1.04	[mm]				x2	0.68	[mm]				x2	0.63	[mm]
x3	1.51	[mm]															x3	1.51	[mm]				x3	0.86	[mm]				x3	0.96	[mm]				x3	1.09	[mm]				x3	0.93	[mm]				x3	0.7	[mm]
x4	1.81	[mm]															x4	1.81	[mm]				x4	1.01	[mm]				x4	1.16	[mm]				x4	1.34	[mm]				x4	1.18	[mm]				x4	0.9	[mm]
x5	2.11	[mm]															x5	2.11	[mm]				x5	1.21	[mm]				x5	1.36	[mm]				x5	1.59	[mm]				x5	1.43	[mm]				x5	1.1	[mm]
x6	2.41	[mm]															x6	2.41	[mm]				x6	1.41	[mm]				x6	1.56	[mm]				x6	1.84	[mm]				x6	1.68	[mm]				x6	1.3	[mm]
x7	2.71	[mm]															x7	2.71	[mm]				x7	1.61	[mm]				x7	1.76	[mm]				x7	2.09	[mm]				x7	1.93	[mm]				x7	1.5	[mm]
x8	3.01	[mm]															x8	3.01	[mm]				x8	1.81	[mm]				x8	1.96	[mm]				x8	2.34	[mm]				x8	2.18	[mm]				x8	1.7	[mm]
x9	3.11	[mm]															x9	3.11	[mm]				x9	2.01	[mm]				x9	2.16	[mm]				x9	2.59	[mm]				x9	2.43	[mm]				x9	1.9	[mm]
x10	3.21	[mm]															x10	3.21	[mm]				x10	2.21	[mm]				x10	2.36	[mm]				x10	2.84	[mm]				x10	2.68	[mm]				x10	2.1	[mm]
x11	3.31	[mm]															x11	3.31	[mm]	1.0435			x11	2.41	[mm]				x11	2.56	[mm]				x11	3.09	[mm]				x11	2.93	[mm]				x11	2.3	[mm]
x12	3.41	[mm]															x12	3.41	[mm]				x12	2.61	[mm]				x12	2.76	[mm]				x12	3.34	[mm]				x12	3.18	[mm]				x12	2.5	[mm]
x13		[mm]																Analytical	Experimental	Uncertainty (Δ)			x13	2.81	[mm]				x13	2.96	[mm]				x13	3.59	[mm]				x13	3.43	[mm]				x13	2.7	[mm]
x14		[mm]															lj	3.85358	3.61	0.151723	[mm]		x14	3.01	[mm]				x14	3.16	[mm]				x14	3.84	[mm]				x14	3.68	[mm]				x14	2.9	[mm]
x15		[mm]															wj	0.919202		0.0396411	[mm]			Analytical	Experimental	Uncertainty (Δ)			x15	3.36	[mm]				x15	4.09	[mm]				x15	3.93	[mm]				x15	3.1	[mm]
x16		[mm]															h(x=x1)	2.18547	2.42	0.0884286	[um]	1.0435	lj	3.30029	3.35	0.126183	[mm]		x16	3.46	[mm]				x16	4.34	[mm]				x16	4.18	[mm]				x16	3.3	[mm]
x17		[mm]															h(x=x2)	1.64362	1.595	0.0601287	[um]	1.0435	wj	0.748578		0.0333857	[mm]			Analytical	Experimental	Uncertainty (Δ)			x17	4.59	[mm]				x17	4.43	[mm]				x17	3.5	[mm]
… ΔQ	1	[%]															h(x=x3)	1.31707	1.335	0.045607	[um]	1.0435	h(x=x1)	1.55313		0.0771391	[um]		lj	2.09904	3.35	0.0837854	[mm]			Analytical	Experimental	Uncertainty (Δ)				Analytical	Experimental	Uncertainty (Δ)				Analytical	Experimental
… Δw0	0.5	[um]															h(x=x4)	1.09877	1.139	0.0368229	[um]	1.0435	h(x=x2)	1.39585	1.43	0.065851	[um]		wj	0.5154		0.022459	[mm]		lj	5.12541	4.64	0.206079	[mm]		lj	4.22191	3.91	0.157746	[mm]		lj	4.0271	3.65
… Δd	0.5	[um]															h(x=x5)	0.942548	0.99	0.0309347	[um]	1.0435	h(x=x3)	1.28224	1.25	0.058301	[um]		h(x=x1)	2.46958		0.110164	[um]		wj	1.20414		0.0526201	[mm]		wj	0.952223		0.041521	[mm]		wj	0.926661
… Δx	25	[um]															h(x=x6)	0.825219	0.84	0.0267057	[um]	1.0435	h(x=x4)	1.09181	1.02	0.0467346	[um]		h(x=x2)	2.23439	2.3	0.0950862	[um]		h(x=x1)	2.17575		0.0905462	[um]		h(x=x1)	2.49973	2.2	0.150013	[um]		h(x=x1)	2.22806
Results - Take Resulting Analytical and Error																	h(x=x7)	0.733866	0.82	0.0235156	[um]	1.0435	h(x=x5)	0.911343	0.842	0.0369546	[um]		h(x=x3)	1.95509	2.02	0.0787342	[um]		h(x=x2)	1.86194	2.05	0.0730745	[um]		h(x=x2)	1.83804	1.58	0.0908426	[um]		h(x=x2)	2.12196	1.9
	Analytical	Uncertainty (Δ)															h(x=x8)	0.660723	0.745	0.0210198	[um]	1.0435	h(x=x6)	0.782075	0.7	0.0305953	[um]		h(x=x4)	1.618	1.75	0.0611218	[um]		h(x=x3)	1.77653	2.02	0.0686505	[um]		h(x=x3)	1.34394	1.47	0.0571454	[um]		h(x=x3)	1.90977	1.67
lj	3.85358	0.151723	[mm]														h(x=x9)	0.639478	0.684	0.0202333	[um]	1.0435	h(x=x7)	0.684923	0.62	0.0261378	[um]		h(x=x5)	1.38006	1.56	0.0499818	[um]		h(x=x4)	1.44509	1.56	0.0527369	[um]		h(x=x4)	1.05921	1.115	0.0414553	[um]		h(x=x4)	1.48537	1.235
wj	0.919202	0.0396411	[mm]														h(x=x10)	0.619557	0.675	0.0196361	[um]	1.0435	h(x=x8)	0.60924	0.601	0.0228394	[um]		h(x=x6)	1.20313	1.37	0.0423285	[um]		h(x=x5)	1.21787	1.288	0.0428909	[um]		h(x=x5)	0.874031	0.945	0.0325542	[um]		h(x=x5)	1.21531	1.3
h(x=x1)	2.08656	0.0884286	[um]														h(x=x11)	0.600839	0.673	0.0190117	[um]	1.0435	h(x=x9)	0.54862	0.48	0.0199282	[um]		h(x=x7)	1.06641	1.235	0.0367501	[um]		h(x=x6)	1.0524	1.18	0.0362046	[um]		h(x=x6)	0.743967	0.775	0.026848	[um]		h(x=x6)	1.02834	1.12
h(x=x2)	1.56923	0.0601287	[um]														h(x=x12)	0.583219	0.606	0.0184264	[um]	1.0435	h(x=x10)	0.498971	0.47	0.0182778	[um]		h(x=x8)	0.957594	1.1	0.0325015	[um]		h(x=x7)	0.926514	0.996	0.0313625	[um]		h(x=x7)	0.647598	0.61	0.0228793	[um]		h(x=x7)	0.891224	0.944
h(x=x3)	1.25746	0.045607	[um]																SSTot	3.07003		12.522	h(x=x11)	0.457562	0.466	0.0166318	[um]		h(x=x9)	0.868928	1.01	0.0286796	[um]		h(x=x8)	0.827527	0.914	0.027689	[um]		h(x=x8)	0.573332	0.585	0.0199563	[um]		h(x=x8)	0.786374	0.783
h(x=x4)	1.04904	0.0368229	[um]																SS Res	0.0870821			h(x=x12)	0.4225	0.413	0.0152638	[um]		h(x=x10)	0.79529	0.906	0.0264483	[um]		h(x=x9)	0.74765	0.785	0.0245074	[um]		h(x=x9)	0.514348	0.584	0.0174504	[um]		h(x=x9)	0.703598	0.762
h(x=x5)	0.899889	0.0309347	[um]															R2 = 1- SSres/Sstot		0.971635			h(x=x13)	0.392429	0.405	0.014108	[um]		h(x=x11)	0.733158	0.88	0.0242122	[um]		h(x=x10)	0.681836	0.807	0.0224728	[um]		h(x=x10)	0.466367	0.43	0.0159295	[um]		h(x=x10)	0.636588	0.67
h(x=x6)	0.78787	0.0267057	[um]																	3.07003			h(x=x14)	0.366354	0.345	0.0131181	[um]		h(x=x12)	0.68003	0.822	0.0223323	[um]		h(x=x11)	0.626671	0.724	0.0205505	[um]		h(x=x11)	0.426575	0.44	0.0144805	[um]		h(x=x11)	0.581233	0.592
h(x=x7)	0.700652	0.0235156	[um]																	3.07003					SSTot	1.42538			h(x=x13)	0.634082	0.762	0.0207289	[um]		h(x=x12)	0.579765	0.638	0.0189365	[um]		h(x=x12)	0.393039	0.43	0.0132777	[um]		h(x=x12)	0.534734	0.589
h(x=x8)	0.630819	0.0210198	[um]																						SS Res	0.0295125			h(x=x14)	0.593951	0.74	0.0193444	[um]		h(x=x13)	0.539391	0.627	0.0175613	[um]		h(x=x13)	0.364392	0.417	0.0122626	[um]		h(x=x13)	0.495124	0.56
h(x=x9)	0.610536	0.0202333	[um]																					R2 = 1- SSres/Sstot		0.979295			h(x=x15)	0.558596	0.69	0.0181364	[um]		h(x=x14)	0.504274	0.59	0.016375	[um]		h(x=x14)	0.339637	NA	0.011394	[um]		h(x=x14)	0.460978	0.525
h(x=x10)	0.591516	0.0196361	[um]													Variable to multiply by													h(x=x16)	0.542452	0.685	0.0175882	[um]		h(x=x15)	0.473451	0.45	0.0153408	[um]		h(x=x15)	0.318032	NA	0.010642	[um]		h(x=x15)	0.431237	0.493
h(x=x11)	0.573645	0.0190117	[um]													0.964562																			h(x=x16)	0.446178		0.014431	[um]		h(x=x16)	0.299011	NA	0.0099843	[um]		h(x=x16)	0.405102	NA
h(x=x12)	0.556823	0.0184264	[um]																												SSTot	3.64929			h(x=x17)	0.421877		0.0136242	[um]		h(x=x17)	0.282136	NA	0.00940411	[um]		h(x=x17)	0.381953	NA
h(x=x13)	#DIV/0!	#DIV/0!	[um]																												SS Res	0.284023					SSTot	3.45142					SSTot	3.70996					SSTot
h(x=x14)	#DIV/0!	#DIV/0!	[um]																											R2 = 1- SSres/Sstot		0.92217					SS Res	0.186858					SS Res	0.193461					SS Res
h(x=x15)	#DIV/0!	#DIV/0!	[um]																																	R2 = 1- SSres/Sstot		0.945861				R2 = 1- SSres/Sstot		0.947853				R2 = 1- SSres/Sstot
h(x=x16)	#DIV/0!	#DIV/0!	[um]
h(x=x17)	#DIV/0!	#DIV/0!	[um]
																																				0.993637						0.976688						0.975301
																	A03						D04						B05						B07						B03							D01
																	Q	2.47	[mL/min]				Q	1.9	[mL/min]				Q	3.6	[mL/min]				Q	3.6	[mL/min]				Q	3.6	[mL/min]					Q	3.3
																	w0	69.8	[um]	0.989331			w0	57	[um]				w0	120.22	[um]	0.997744			w0	117.15	[um]	0.999768			w0	116.83	[um]	0.99524				w0	88.81
																	d	18.4	[um]				d	17.17	[um]				d	17.4	[um]				d	17.4	[um]				d	17.24	[um]					d	17.67
																	x1	0.7	[mm]				x1	0.24	[mm]				x1	0.72	[mm]				x1	0.51	[mm]				x1	0.57	[mm]					x1	0.45
																	x2	0.83	[mm]				x2	0.44	[mm]				x2	0.73	[mm]				x2	0.59	[mm]				x2	0.58	[mm]					x2	0.46
																	x3	0.98	[mm]				x3	0.64	[mm]				x3	0.92	[mm]				x3	0.66	[mm]				x3	0.6	[mm]					x3	0.65
																	x4	1.08	[mm]				x4	0.84	[mm]				x4	1.12	[mm]				x4	0.76	[mm]				x4	0.85	[mm]					x4	0.95
																	x5	1.2	[mm]				x5	1.04	[mm]				x5	1.32	[mm]				x5	1.01	[mm]				x5	1.1	[mm]					x5	1.25
																	x6	1.33	[mm]				x6	1.24	[mm]				x6	1.52	[mm]				x6	1.26	[mm]				x6	1.35	[mm]					x6	1.55
																	x7	1.45	[mm]				x7	1.44	[mm]				x7	1.72	[mm]				x7	1.51	[mm]				x7	1.6	[mm]					x7	1.85
																	x8	1.58	[mm]				x8	1.64	[mm]				x8	1.92	[mm]				x8	1.76	[mm]				x8	1.85	[mm]					x8	2.15
																	x9	1.7	[mm]				x9	1.84	[mm]				x9	2.12	[mm]				x9	2.01	[mm]				x9	2.1	[mm]					x9	2.45
																	x10	1.83	[mm]				x10	2.04	[mm]				x10	2.32	[mm]				x10	2.26	[mm]				x10	2.35	[mm]					x10	2.75
																		Analytical	Experimental	Uncertainty (Δ)				Analytical	Experimental	Uncertainty (Δ)			x11	2.52	[mm]				x11	2.51	[mm]				x11	2.6	[mm]					x11	3.05
																	lj	2.90499	2.12	0.107147	[mm]		lj	2.22177	2.25	0.083454	[mm]		x12	2.72	[mm]				x12	2.76	[mm]				x12	2.85	[mm]					x12	3.35
																	wj	0.653495		0.0289361	[mm]		wj	0.492276		0.0228798	[mm]		x13	2.92	[mm]				x13	3.01	[mm]				x13	3.1	[mm]					x13	3.65
																	h(x=x1)	1.54202	1.537	0.0782843	[um]		h(x=x1)	3.5532	1.43	0.403295	[um]		x14	3.12	[mm]				x14	3.26	[mm]				x14	3.35	[mm]					x14	3.95
																	h(x=x2)	1.3005	1.23	0.0607847	[um]		h(x=x2)	1.93811	1.07	0.135347	[um]	103.245	x15	3.32	[mm]				x15	3.51	[mm]				x15	3.6	[mm]					x15	4.25
																	h(x=x3)	1.10145	1.087	0.0481504	[um]		h(x=x3)	1.33245	0.825	0.0740534	[um]		x16	3.52	[mm]				x16	3.76	[mm]				x16	3.7	[mm]
																	h(x=x4)	0.99946	1.012	0.0422677	[um]		h(x=x4)	1.0152	0.743	0.0499049	[um]		x17	3.65	[mm]				x17	4.01	[mm]
																	h(x=x5)	0.899514	0.88	0.0368682	[um]		h(x=x5)	0.819969	0.602	0.0375136	[um]			Analytical	Experimental	Uncertainty (Δ)				Analytical	Experimental	Uncertainty (Δ)				Analytical	Experimental	Uncertainty (Δ)					Analytical
																	h(x=x6)	0.811591	0.795	0.0324012	[um]		h(x=x6)	0.687716	0.513	0.0300798	[um]		lj	3.96406	3.71	0.152773	[mm]		lj	4.05415	3.66	0.15616	[mm]		lj	4.09893	3.87	0.158537	[mm]			lj	4.29417
																	h(x=x7)	0.744425	0.783	0.029157	[um]		h(x=x7)	0.5922	0.448	0.0251439	[um]		wj	0.932987		0.0400313	[mm]		wj	0.950957		0.0408564	[mm]		wj	0.960507		0.0413829	[mm]			wj	0.977468
																	h(x=x8)	0.683175	0.723	0.0263181	[um]		h(x=x8)	0.51998	0.372	0.021629	[um]		h(x=x1)	2.4418		0.110735	[um]		h(x=x1)	3.35921		0.189631	[um]		h(x=x1)	2.96984		0.155799	[um]			h(x=x1)	2.9309
																	h(x=x9)	0.634951	0.702	0.0236625	[um]		h(x=x9)	0.463461	0.35	0.0186221	[um]		h(x=x2)	2.40835	2.27	0.108404	[um]		h(x=x2)	2.90372	2.8	0.148621	[um]		h(x=x2)	2.91863	2.8	0.151397	[um]			h(x=x2)	2.86719
																	h(x=x10)	0.589845	0.64	0.0221963	[um]		h(x=x10)	0.418023	0.3	0.0169487	[um]		h(x=x3)	1.91097	1.79	0.0769599	[um]		h(x=x3)	2.59575	2.5	0.124028	[um]		h(x=x3)	2.82134	2.69	0.143228	[um]			h(x=x3)	2.02909
																													h(x=x4)	1.56973	1.59	0.0587006	[um]		h(x=x4)	2.25421	2.18	0.0996388	[um]		h(x=x4)	1.99154	2.02	0.0836626	[um]			h(x=x4)	1.38832
																													h(x=x5)	1.33189	1.315	0.0474381	[um]		h(x=x5)	1.69623	1.66	0.0660358	[um]		h(x=x5)	1.53892	1.576	0.0583916	[um]			h(x=x5)	1.05513
																													h(x=x6)	1.15664	1.13	0.0398417	[um]		h(x=x6)	1.35968	1.38	0.0492342	[um]		h(x=x6)	1.25393	1.226	0.0448233	[um]			h(x=x6)	0.850908
																													h(x=x7)	1.02215	1.023	0.0343812	[um]		h(x=x7)	1.13457	1.163	0.0392955	[um]		h(x=x7)	1.058	1.054	0.0364305	[um]			h(x=x7)	0.712923
																													h(x=x8)	0.915673	0.93	0.0302669	[um]		h(x=x8)	0.973407	0.983	0.0327511	[um]		h(x=x8)	0.915031	0.882	0.0307355	[um]			h(x=x8)	0.613445
																													h(x=x9)	0.829289	0.836	0.0265508	[um]		h(x=x9)	0.852337	0.874	0.0274083	[um]		h(x=x9)	0.806098	0.788	0.0260238	[um]			h(x=x9)	0.538329
																													h(x=x10)	0.757799	0.752	0.024472	[um]		h(x=x10)	0.758052	0.783	0.0246562	[um]		h(x=x10)	0.720343	0.704	0.0234913	[um]			h(x=x10)	0.479603
																			SSTot	0.710297									h(x=x11)	0.697656	0.738	0.0223512	[um]		h(x=x11)	0.682549	0.714	0.0219723	[um]		h(x=x11)	0.65108	0.762	0.0210388	[um]			h(x=x11)	0.432429
																			SS Res	0.0161029									h(x=x12)	0.646358	0.67	0.0205764	[um]		h(x=x12)	0.620724	0.66	0.0198271	[um]		h(x=x12)	0.593967	0.599	0.0190599	[um]			h(x=x12)	0.393704
																		R2 = 1- SSres/Sstot		0.977329									h(x=x13)	0.602086	0.63	0.0190685	[um]		h(x=x13)	0.569168	0.608	0.0180713	[um]		h(x=x13)	0.546067	0.588	0.017428	[um]			h(x=x13)	0.361344
																													h(x=x14)	0.563491	0.598	0.0177707	[um]		h(x=x14)	0.525521	0.575	0.0166067	[um]		h(x=x14)	0.505315	0.595	0.0160583	[um]			h(x=x14)	0.333901
																													h(x=x15)	0.529546	0.57	0.0166415	[um]		h(x=x15)	0.48809	NA	0.0153656	[um]		h(x=x15)	0.470224	0.597	0.0148915	[um]			h(x=x15)	0.310331
																													h(x=x16)	0.499458	0.553	0.0156496	[um]		h(x=x16)	0.455637	NA	0.0142998	[um]		h(x=x16)	0.457515	0.597	0.0144717	[um]
																													h(x=x17)	0.481669	0.547	0.0150669	[um]		h(x=x17)	0.427231	NA	0.0133743	[um]
																															SSTot	3.86081					SSTot	6.92588					SSTot	8.13542
																															SS Res	0.048392					SS Res	0.0356398					SS Res	0.0936508
																														R2 = 1- SSres/Sstot		0.987466				R2 = 1- SSres/Sstot		0.994854				R2 = 1- SSres/Sstot		0.988489					R2 = 1- SSres/Sstot
[truncated: 5 more columns]

## Sheet: ExperimentData&HaTrends
Evaluate Error - Plug in Values Below																	C02						B06						C04						B01						A04						A06
Q	3.75	[mL/min]															Q	3.75	[mL/min]				Q	2.65	[mL/min]				Q	2.65	[mL/min]				Q	4.3	[mL/min]				Q	3.2	[mL/min]				Q	3.2	[mL/min]
w0	141.61	[um]															w0	141.61	[um]				w0	76.46	[um]				w0	137.68	[um]				w0	144	[um]				w0	81.8	[um]				w0	95.36	[um]
d	16.71	[um]															d	16.71	[um]				d	17.16	[um]				d	16.22	[um]				d	16	[um]				d	18.18	[um]				d	16.68	[um]
x1	0.91	[mm]															x1	0.91	[mm]				x1	0.71	[mm]				x1	0.76	[mm]				x1	0.89	[mm]				x1	0.5	[mm]				x1	0.6	[mm]
x2	1.21	[mm]															x2	1.21	[mm]				x2	0.79	[mm]				x2	0.84	[mm]				x2	1.04	[mm]				x2	0.68	[mm]				x2	0.63	[mm]
x3	1.51	[mm]															x3	1.51	[mm]				x3	0.86	[mm]				x3	0.96	[mm]				x3	1.09	[mm]				x3	0.93	[mm]				x3	0.7	[mm]
x4	1.81	[mm]															x4	1.81	[mm]				x4	1.01	[mm]				x4	1.16	[mm]				x4	1.34	[mm]				x4	1.18	[mm]				x4	0.9	[mm]
x5	2.11	[mm]															x5	2.11	[mm]				x5	1.21	[mm]				x5	1.36	[mm]				x5	1.59	[mm]				x5	1.43	[mm]				x5	1.1	[mm]
x6	2.41	[mm]															x6	2.41	[mm]				x6	1.41	[mm]				x6	1.56	[mm]				x6	1.84	[mm]				x6	1.68	[mm]				x6	1.3	[mm]
x7	2.71	[mm]															x7	2.71	[mm]				x7	1.61	[mm]				x7	1.76	[mm]				x7	2.09	[mm]				x7	1.93	[mm]				x7	1.5	[mm]
x8	3.01	[mm]															x8	3.01	[mm]				x8	1.81	[mm]				x8	1.96	[mm]				x8	2.34	[mm]				x8	2.18	[mm]				x8	1.7	[mm]
x9	3.11	[mm]															x9	3.11	[mm]				x9	2.01	[mm]				x9	2.16	[mm]				x9	2.59	[mm]				x9	2.43	[mm]				x9	1.9	[mm]
x10	3.21	[mm]															x10	3.21	[mm]				x10	2.21	[mm]				x10	2.36	[mm]				x10	2.84	[mm]				x10	2.68	[mm]				x10	2.1	[mm]
x11	3.31	[mm]															x11	3.31	[mm]				x11	2.41	[mm]				x11	2.56	[mm]				x11	3.09	[mm]				x11	2.93	[mm]				x11	2.3	[mm]
x12	3.41	[mm]															x12	3.41	[mm]				x12	2.61	[mm]				x12	2.76	[mm]				x12	3.34	[mm]				x12	3.18	[mm]				x12	2.5	[mm]
x13		[mm]																Analytical	Experimental	Uncertainty (Δ)			x13	2.81	[mm]				x13	2.96	[mm]				x13	3.59	[mm]				x13	3.43	[mm]				x13	2.7	[mm]
x14		[mm]															lj	3.85358	3.61	0.151723	[mm]		x14	3.01	[mm]				x14	3.16	[mm]				x14	3.84	[mm]				x14	3.68	[mm]				x14	2.9	[mm]
x15		[mm]															wj	0.919202		0.0396411	[mm]			Analytical	Experimental	Uncertainty (Δ)			x15	3.36	[mm]				x15	4.09	[mm]				x15	3.93	[mm]				x15	3.1	[mm]
x16		[mm]															h(x=x1)	2.08656	2.42	0.235869	[um]		lj	3.30029	3.35	0.126183	[mm]		x16	3.46	[mm]				x16	4.34	[mm]				x16	4.18	[mm]				x16	3.3	[mm]
x17		[mm]															h(x=x2)	1.56923	1.595	0.176941	[um]		wj	0.748578		0.0333857	[mm]			Analytical	Experimental	Uncertainty (Δ)			x17	4.59	[mm]				x17	4.43	[mm]				x17	3.5	[mm]
… ΔQ	1	[%]															h(x=x3)	1.25746	1.335	0.141619	[um]		h(x=x1)	1.56225		0.187723	[um]		lj	2.09904	3.35	0.0837854	[mm]			Analytical	Experimental	Uncertainty (Δ)				Analytical	Experimental	Uncertainty (Δ)				Analytical	Experimental
… Δw0	0.5	[um]															h(x=x4)	1.04904	1.139	0.11807	[um]		h(x=x2)	1.40404	1.43	0.168466	[um]		wj	0.5154		0.022459	[mm]		lj	5.12541	4.64	0.206079	[mm]		lj	4.22191	3.91	0.157746	[mm]		lj	4.0271	3.65
… Δd	0.5	[um]															h(x=x5)	0.899889	0.99	0.101243	[um]		h(x=x3)	1.28976	1.25	0.154604	[um]		h(x=x1)	2.35766		0.27509	[um]		wj	1.20414		0.0526201	[mm]		wj	0.952223		0.041521	[mm]		wj	0.926661
… Δx	25	[um]															h(x=x6)	0.78787	0.84	0.0886175	[um]		h(x=x4)	1.09821	1.02	0.131454	[um]		h(x=x2)	2.13312	2.3	0.248538	[um]		h(x=x1)	2.07246		0.243506	[um]		h(x=x1)	2.51098	2.2	0.287015	[um]		h(x=x1)	2.17933
Results - Take Resulting Analytical and Error																	h(x=x7)	0.700652	0.82	0.0787937	[um]		h(x=x5)	0.91669	0.842	0.1096	[um]		h(x=x3)	1.86648	2.02	0.217143	[um]		h(x=x2)	1.77354	2.05	0.20807	[um]		h(x=x2)	1.84631	1.58	0.209385	[um]		h(x=x2)	2.07555	1.9
	Analytical	Uncertainty (Δ)															h(x=x8)	0.630819	0.745	0.0709316	[um]		h(x=x6)	0.786663	0.7	0.0939884	[um]		h(x=x4)	1.54467	1.75	0.179425	[um]		h(x=x3)	1.69219	2.02	0.198451	[um]		h(x=x3)	1.34999	1.47	0.152431	[um]		h(x=x3)	1.86799	1.67
lj	3.85358	0.151723	[mm]														h(x=x9)	0.610536	0.684	0.0686485	[um]		h(x=x7)	0.688941	0.62	0.0822754	[um]		h(x=x5)	1.31751	1.56	0.152898	[um]		h(x=x4)	1.37648	1.56	0.16122	[um]		h(x=x4)	1.06397	1.115	0.119907	[um]		h(x=x4)	1.45288	1.235
wj	0.919202	0.0396411	[mm]														h(x=x10)	0.591516	0.675	0.0665078	[um]		h(x=x8)	0.612815	0.601	0.0731613	[um]		h(x=x6)	1.1486	1.37	0.133216	[um]		h(x=x5)	1.16005	1.288	0.135772	[um]		h(x=x5)	0.877964	0.945	0.0988451	[um]		h(x=x5)	1.18872	1.3
h(x=x1)	2.08656	0.0884286	[um]														h(x=x11)	0.573645	0.673	0.0644967	[um]		h(x=x9)	0.551838	0.48	0.0658668	[um]		h(x=x7)	1.01808	1.235	0.118031	[um]		h(x=x6)	1.00244	1.18	0.117272	[um]		h(x=x6)	0.747314	0.775	0.0840863	[um]		h(x=x6)	1.00584	1.12
h(x=x2)	1.56923	0.0601287	[um]														h(x=x12)	0.556823	0.606	0.0626037	[um]		h(x=x10)	0.501898	0.47	0.059896	[um]		h(x=x8)	0.914193	1.1	0.105956	[um]		h(x=x7)	0.882529	0.996	0.103213	[um]		h(x=x7)	0.650512	0.61	0.0731667	[um]		h(x=x7)	0.871731	0.944
h(x=x3)	1.25746	0.045607	[um]																				h(x=x11)	0.460247	0.466	0.0549184	[um]		h(x=x9)	0.829546	1.01	0.0961253	[um]		h(x=x8)	0.788242	0.914	0.0921668	[um]		h(x=x8)	0.575912	0.585	0.0647595	[um]		h(x=x8)	0.769174	0.783
h(x=x4)	1.04904	0.0368229	[um]																				h(x=x12)	0.424979	0.413	0.0507051	[um]		h(x=x10)	0.759245	0.906	0.0879651	[um]		h(x=x9)	0.712157	0.785	0.0832578	[um]		h(x=x9)	0.516662	0.584	0.0580865	[um]		h(x=x9)	0.688209	0.762
h(x=x5)	0.899889	0.0309347	[um]													0.89							h(x=x13)	0.394731	0.405	0.0470925	[um]		h(x=x11)	0.699929	0.88	0.0810828	[um]		h(x=x10)	0.649467	0.807	0.0759201	[um]		h(x=x10)	0.468466	0.43	0.052661	[um]		h(x=x10)	0.622665	0.67
h(x=x6)	0.78787	0.0267057	[um]													0.89							h(x=x14)	0.368503	0.345	0.0439607	[um]		h(x=x12)	0.64921	0.822	0.0751999	[um]		h(x=x11)	0.596921	0.724	0.0697716	[um]		h(x=x11)	0.428494	0.44	0.0481629	[um]		h(x=x11)	0.56852	0.592
h(x=x7)	0.700652	0.0235156	[um]													0.00089													h(x=x13)	0.605344	0.762	0.0701133	[um]		h(x=x12)	0.552241	0.638	0.0645448	[um]		h(x=x12)	0.394808	0.43	0.0443731	[um]		h(x=x12)	0.523038	0.589
h(x=x8)	0.630819	0.0210198	[um]																SSTot	3.07003									h(x=x14)	0.567031	0.74	0.0656715	[um]		h(x=x13)	0.513784	0.627	0.0600468	[um]		h(x=x13)	0.366032	0.417	0.0411364	[um]		h(x=x13)	0.484295	0.56
h(x=x9)	0.610536	0.0202333	[um]																SS Res	0.188728									h(x=x15)	0.53328	0.69	0.0617592	[um]		h(x=x14)	0.480335	0.59	0.056135	[um]		h(x=x14)	0.341165	NA	0.0383399	[um]		h(x=x14)	0.450895	0.525
h(x=x10)	0.591516	0.0196361	[um]															R2 = 1- SSres/Sstot		0.938526					SSTot	1.42538			h(x=x16)	0.517867	0.685	0.0599729	[um]		h(x=x15)	0.450975	0.45	0.0527018	[um]		h(x=x15)	0.319463	NA	0.0358996	[um]		h(x=x15)	0.421805	0.493
h(x=x11)	0.573645	0.0190117	[um]																						SS Res	0.0333658									h(x=x16)	0.424997		0.0496645	[um]		h(x=x16)	0.300356	NA	0.0337513	[um]		h(x=x16)	0.396241	NA
h(x=x12)	0.556823	0.0184264	[um]																					R2 = 1- SSres/Sstot		0.976592					SSTot	3.64929			h(x=x17)	0.401849		0.0469583	[um]		h(x=x17)	0.283406	NA	0.0318458	[um]		h(x=x17)	0.373599	NA
h(x=x13)	#DIV/0!	#DIV/0!	[um]																												SS Res	0.50631					SSTot	3.45142					SSTot	3.70996					SSTot
h(x=x14)	#DIV/0!	#DIV/0!	[um]																											R2 = 1- SSres/Sstot		0.861258					SS Res	0.372628					SS Res	0.201599					SS Res
h(x=x15)	#DIV/0!	#DIV/0!	[um]																																	R2 = 1- SSres/Sstot		0.892036				R2 = 1- SSres/Sstot		0.94566				R2 = 1- SSres/Sstot
h(x=x16)	#DIV/0!	#DIV/0!	[um]
h(x=x17)	#DIV/0!	#DIV/0!	[um]
																	A03												B05						B07						B03							D01
																	Q	2.47	[mL/min]										Q	3.6	[mL/min]				Q	3.6	[mL/min]				Q	3.6	[mL/min]					Q	3.3
																	w0	69.8	[um]										w0	120.22	[um]				w0	117.15	[um]				w0	116.83	[um]					w0	88.81
																	d	18.4	[um]										d	17.4	[um]				d	17.4	[um]				d	17.24	[um]					d	17.67
																	x1	0.7	[mm]										x1	0.72	[mm]				x1	0.51	[mm]				x1	0.57	[mm]					x1	0.45
																	x2	0.83	[mm]										x2	0.73	[mm]				x2	0.59	[mm]				x2	0.58	[mm]					x2	0.46
																	x3	0.98	[mm]										x3	0.92	[mm]				x3	0.66	[mm]				x3	0.6	[mm]					x3	0.65
																	x4	1.08	[mm]										x4	1.12	[mm]				x4	0.76	[mm]				x4	0.85	[mm]					x4	0.95
… Δw0	5e-06	[m]	5	um		0.0918132											x5	1.2	[mm]										x5	1.32	[mm]				x5	1.01	[mm]				x5	1.1	[mm]					x5	1.25
… Δd	1.587e-06	[m]	1.587	um		0.246962											x6	1.33	[mm]										x6	1.52	[mm]				x6	1.26	[mm]				x6	1.35	[mm]					x6	1.55
… Δx	0.00015	[m]	10	um		26.0033											x7	1.45	[mm]										x7	1.72	[mm]				x7	1.51	[mm]				x7	1.6	[mm]					x7	1.85
																	x8	1.58	[mm]										x8	1.92	[mm]				x8	1.76	[mm]				x8	1.85	[mm]					x8	2.15
																	x9	1.7	[mm]										x9	2.12	[mm]				x9	2.01	[mm]				x9	2.1	[mm]					x9	2.45
																	x10	1.83	[mm]										x10	2.32	[mm]				x10	2.26	[mm]				x10	2.35	[mm]					x10	2.75
																		Analytical	Experimental	Uncertainty (Δ)									x11	2.52	[mm]				x11	2.51	[mm]				x11	2.6	[mm]					x11	3.05
																	lj	2.90499	2.12	0.107147	[mm]								x12	2.72	[mm]				x12	2.76	[mm]				x12	2.85	[mm]					x12	3.35
																	wj	0.653495		0.0289361	[mm]								x13	2.92	[mm]				x13	3.01	[mm]				x13	3.1	[mm]					x13	3.65
																	h(x=x1)	1.59243	1.537	0.18456	[um]								x14	3.12	[mm]				x14	3.26	[mm]				x14	3.35	[mm]					x14	3.95
																	h(x=x2)	1.34301	1.23	0.155293	[um]							#DIV/0!	x15	3.32	[mm]				x15	3.51	[mm]				x15	3.6	[mm]					x15	4.25
																	h(x=x3)	1.13745	1.087	0.131311	[um]								x16	3.52	[mm]				x16	3.76	[mm]				x16	3.7	[mm]						Analytical
																	h(x=x4)	1.03213	1.012	0.119067	[um]								x17	3.65	[mm]				x17	4.01	[mm]					Analytical	Experimental	Uncertainty (Δ)				lj	4.29417
																	h(x=x5)	0.928919	0.88	0.107091	[um]									Analytical	Experimental	Uncertainty (Δ)				Analytical	Experimental	Uncertainty (Δ)			lj	4.09893	3.87	0.158537	[mm]			wj	0.977468
																	h(x=x6)	0.838122	0.795	0.096574	[um]								lj	3.96406	3.71	0.152773	[mm]		lj	4.05415	3.66	0.15616	[mm]		wj	0.960507		0.0413829	[mm]			h(x=x1)	2.90377
																	h(x=x7)	0.76876	0.783	0.0885502	[um]								wj	0.932987		0.0400313	[mm]		wj	0.950957		0.0408564	[mm]		h(x=x1)	2.86813		0.323989	[um]			h(x=x2)	2.84064
																	h(x=x8)	0.705508	0.723	0.0812403	[um]								h(x=x1)	2.35534		0.261675	[um]		h(x=x1)	3.24552		0.364937	[um]		h(x=x2)	2.81868	2.8	0.318245	[um]			h(x=x3)	2.0103
																	h(x=x9)	0.655707	0.702	0.0754893	[um]								h(x=x2)	2.32308	2.27	0.258024	[um]		h(x=x2)	2.80545	2.8	0.313994	[um]		h(x=x3)	2.72473	2.69	0.307354	[um]			h(x=x4)	1.37547
																	h(x=x10)	0.609127	0.64	0.0701135	[um]								h(x=x3)	1.84331	1.79	0.20404	[um]		h(x=x3)	2.5079	2.5	0.279914	[um]		h(x=x4)	1.92334	2.02	0.215523	[um]			h(x=x5)	1.04536
																													h(x=x4)	1.51415	1.59	0.167288	[um]		h(x=x4)	2.17791	2.18	0.242421	[um]		h(x=x5)	1.48621	1.576	0.166095	[um]			h(x=x6)	0.843029
																													h(x=x5)	1.28473	1.315	0.141784	[um]		h(x=x5)	1.63882	1.66	0.18175	[um]		h(x=x6)	1.21099	1.226	0.135156	[um]			h(x=x7)	0.706321
																													h(x=x6)	1.11569	1.13	0.123043	[um]		h(x=x6)	1.31366	1.38	0.145439	[um]		h(x=x7)	1.02177	1.054	0.11395	[um]			h(x=x8)	0.607765
																													h(x=x7)	0.985957	1.023	0.108684	[um]		h(x=x7)	1.09617	1.163	0.121246	[um]		h(x=x8)	0.883695	0.882	0.0985049	[um]			h(x=x9)	0.533345
																													h(x=x8)	0.883253	0.93	0.0973307	[um]		h(x=x8)	0.940462	0.983	0.103964	[um]		h(x=x9)	0.778493	0.788	0.0867506	[um]			h(x=x10)	0.475162
																													h(x=x9)	0.799927	0.836	0.0881272	[um]		h(x=x9)	0.823489	0.874	0.0909998	[um]		h(x=x10)	0.695675	0.704	0.0775047	[um]			h(x=x11)	0.428424
																													h(x=x10)	0.730968	0.752	0.0805154	[um]		h(x=x10)	0.732395	0.783	0.0809129	[um]		h(x=x11)	0.628783	0.762	0.0700411	[um]			h(x=x12)	0.390058
																			SSTot	0.710297									h(x=x11)	0.672955	0.738	0.0741149	[um]		h(x=x11)	0.659447	0.714	0.0728405	[um]		h(x=x12)	0.573627	0.599	0.0638894	[um]			h(x=x13)	0.357999
																			SS Res	0.0266531									h(x=x12)	0.623473	0.67	0.0686576	[um]		h(x=x12)	0.599715	0.66	0.0662337	[um]		h(x=x13)	0.527366	0.588	0.0587316	[um]			h(x=x14)	0.330809
																		R2 = 1- SSres/Sstot		0.962476									h(x=x13)	0.580769	0.63	0.0639494	[um]		h(x=x13)	0.549905	0.608	0.0607263	[um]		h(x=x14)	0.488011	0.595	0.0543447	[um]			h(x=x15)	0.307458
																													h(x=x14)	0.54354	0.598	0.0598457	[um]		h(x=x14)	0.507734	0.575	0.0560649	[um]		h(x=x15)	0.454121	0.597	0.0505679	[um]
																													h(x=x15)	0.510797	0.57	0.0562372	[um]		h(x=x15)	0.471571	NA	0.0520683	[um]		h(x=x16)	0.441848	0.597	0.0492002	[um]
																													h(x=x16)	0.481774	0.553	0.0530393	[um]		h(x=x16)	0.440216	NA	0.0486039	[um]
																													h(x=x17)	0.464615	0.547	0.0511488	[um]		h(x=x17)	0.412771	NA	0.0455718	[um]				SSTot	8.13542
																															SSTot	3.86081					SSTot	6.92588					SS Res	0.0983871					R2 = 1- SSres/Sstot
																															SS Res	0.0449853					SS Res	0.030844				R2 = 1- SSres/Sstot		0.987906
																														R2 = 1- SSres/Sstot		0.988348				R2 = 1- SSres/Sstot		0.995547
[truncated: 3 more columns]

## Sheet: Fig3b Data
	Width	Measured		New			Measured		New	Measured			Measured		New	Measured			Measured		New	Measured			Measured		New	Measured
	141.61	2.42		2.27096			0.0170892		0.0160368	0.0170892			0.0170892		0.0160368	0.0170892			0.0187026		0.0189702	0.0187026			0.0167054		0.0168637	0.0167054
	141.61	1.595		1.70792			0.0112633		0.0120607	0.0112633			0.0112633		0.0120607	0.0112633			0.0163484		0.0174261	0.0163484			0.0146717		0.0147557	0.0146717
	141.61	1.335		1.36859			0.0094273		0.00966453	0.0094273			0.0094273		0.00966453	0.0094273			0.0133403		0.0148381	0.0133403			0.0127106		0.0122116	0.0127106
	141.61	1.139		1.14176			0.00804322		0.00806268	0.00804322			0.00804322		0.00806268	0.00804322			0.0110123		0.0123855	0.0110123			0.0113306		0.0104158	0.0113306
	141.61	0.99		0.979421			0.00699103		0.00691633	0.00699103			0.00699103		0.00691633	0.00699103			0.00915511		0.0106287	0.00915511			0.00995061		0.00908046	0.00995061
	141.61	0.84		0.857501			0.00593178		0.00605537	0.00593178			0.00593178		0.00605537	0.00593178			0.00810882		0.00930835	0.00810882			0.00897008		0.00804859	0.00897008
	141.61	0.82		0.762575			0.00579055		0.00538504	0.00579055			0.00579055		0.00538504	0.00579055			0.00786032		0.00827981	0.00786032			0.00798954		0.0072273	0.00798954
	141.61	0.745		0.686571			0.00526093		0.00484832	0.00526093			0.00526093		0.00484832	0.00526093			0.00627779		0.00745594	0.00627779			0.00733585		0.00655811	0.00733585
	141.61	0.684		0.664494			0.00483017		0.00469243	0.00483017			0.00483017		0.00469243	0.00483017			0.006147		0.0067812	0.006147			0.00658048		0.00600234	0.00658048
	141.61	0.675		0.643794			0.00476661		0.00454624	0.00476661			0.00476661		0.00454624	0.00476661			0.00609469		0.00621844	0.00609469			0.00639163		0.0055334	0.00639163
	141.61	0.673		0.624344			0.00475249		0.0044089	0.00475249			0.00475249		0.0044089	0.00475249			0.00540152		0.00574193	0.00540152			0.00597037		0.00513243	0.00597037
	141.61	0.606		0.606035			0.00427936		0.0042796	0.00427936			0.00427936		0.0042796	0.00427936			0.00529689		0.00533326	0.00529689			0.00553457		0.00478565	0.00553457
	76.46	1.43		1.45046			0.0187026		0.0189702	0.0187026									0.00451216		0.00497889	0.00451216			0.00537478		0.00448276	0.00537478
	76.46	1.25		1.3324			0.0163484		0.0174261	0.0163484															0.00501162		0.00421593	0.00501162
	76.46	1.02		1.13452			0.0133403		0.0148381	0.0133403															0.00497531		0.00409408	0.00497531
	76.46	0.842		0.946995			0.0110123		0.0123855	0.0110123
	76.46	0.7		0.812669			0.00915511		0.0106287	0.00915511
	76.46	0.62		0.711717			0.00810882		0.00930835	0.00810882
	76.46	0.601		0.633074			0.00786032		0.00827981	0.00786032
	76.46	0.48		0.570081			0.00627779		0.00745594	0.00627779
	76.46	0.47		0.51849			0.006147		0.0067812	0.006147
	76.46	0.466		0.475462			0.00609469		0.00621844	0.00609469
	76.46	0.413		0.439028			0.00540152		0.00574193	0.00540152
	76.46	0.405		0.407781			0.00529689		0.00533326	0.00529689
	76.46	0.345		0.380686			0.00451216		0.00497889	0.00451216
	137.68	2.3		2.32179			0.0167054		0.0168637	0.0167054
	137.68	2.02		2.03157			0.0146717		0.0147557	0.0146717
	137.68	1.75		1.6813			0.0127106		0.0122116	0.0127106
	137.68	1.56		1.43405			0.0113306		0.0104158	0.0113306
	137.68	1.37		1.2502			0.00995061		0.00908046	0.00995061
	137.68	1.235		1.10813			0.00897008		0.00804859	0.00897008
	137.68	1.1		0.995055			0.00798954		0.0072273	0.00798954
	137.68	1.01		0.90292			0.00733585		0.00655811	0.00733585
	137.68	0.906		0.826402			0.00658048		0.00600234	0.00658048
	137.68	0.88		0.761839			0.00639163		0.0055334	0.00639163
	137.68	0.822		0.706633			0.00597037		0.00513243	0.00597037
	137.68	0.762		0.658888			0.00553457		0.00478565	0.00553457
	137.68	0.74		0.617186			0.00537478		0.00448276	0.00537478
	137.68	0.69		0.580449			0.00501162		0.00421593	0.00501162
	137.68	0.685		0.563673			0.00497531		0.00409408	0.00497531
	144	2.05		1.93478			0.0142361		0.0134359	0.0142361
	144	2.02		1.84602			0.0140278		0.0128196	0.0140278
	144	1.56		1.50162			0.0108333		0.0104279	0.0108333
	144	1.288		1.26551			0.00894444		0.00878829	0.00894444
	144	1.18		1.09357			0.00819444		0.00759423	0.00819444
	144	0.996		0.962759			0.00691667		0.00668583	0.00691667
	144	0.914		0.8599			0.00634722		0.00597153	0.00634722
	144	0.785		0.776898			0.00545139		0.00539513	0.00545139
	144	0.807		0.708509			0.00560417		0.0049202	0.00560417
	144	0.724		0.651187			0.00502778		0.00452213	0.00502778
	144	0.638		0.602445			0.00443056		0.00418365	0.00443056
	144	0.627		0.560492			0.00435417		0.00389231	0.00435417
	144	0.59		0.524002			0.00409722		0.0036389	0.00409722
	144	0.45		0.491972			0.003125		0.00341647	0.003125
	81.8	2.2		2.59752			0.0268949		0.0317545	0.0268949
	81.8	1.58		1.90994			0.0193154		0.0233489	0.0193154
	81.8	1.47		1.39652			0.0179707		0.0170723	0.0179707
	81.8	1.115		1.10064			0.0136308		0.0134553	0.0136308
	81.8	0.945		0.908223			0.0115526		0.011103	0.0115526
	81.8	0.775		0.773071			0.00947433		0.00945074	0.00947433
	81.8	0.61		0.672932			0.00745721		0.00822655	0.00745721
	81.8	0.585		0.595761			0.00715159		0.00728314	0.00715159
	81.8	0.584		0.534469			0.00713936		0.00653385	0.00713936
	81.8	0.43		0.484612			0.00525672		0.00592435	0.00525672
	81.8	0.44		0.443262			0.00537897		0.00541886	0.00537897
	81.8	0.43		0.408415			0.00525672		0.00499285	0.00525672
	81.8	0.417		0.378647			0.0050978		0.00462894	0.0050978
	95.36	1.9		2.20497			0.0199245		0.0231226	0.0199245
	95.36	1.67		1.98448			0.0175126		0.0208104	0.0175126
	95.36	1.235		1.54348			0.0129509		0.0161858	0.0129509
	95.36	1.3		1.26285			0.0136326		0.013243	0.0136326
	95.36	1.12		1.06856			0.011745		0.0112056	0.011745
	95.36	0.944		0.926088			0.00989933		0.0097115	0.00989933
	95.36	0.783		0.817137			0.00821099		0.00856897	0.00821099
	95.36	0.762		0.731122			0.00799077		0.00766697	0.00799077
	95.36	0.67		0.661492			0.00702601		0.00693678	0.00702601
	95.36	0.592		0.603971			0.00620805		0.00633359	0.00620805
	95.36	0.589		0.555653			0.00617659		0.0058269	0.00617659
	95.36	0.56		0.514494			0.00587248		0.00539528	0.00587248
	95.36	0.525		0.479011			0.00550545		0.00502319	0.00550545
	95.36	0.493		0.448107			0.00516988		0.00469911	0.00516988
	69.8	1.537		1.60235			0.0220201		0.0229563	0.0220201
	69.8	1.23		1.35138			0.0176218		0.0193607	0.0176218
	69.8	1.087		1.14453			0.0155731		0.0163973	0.0155731
	69.8	1.012		1.03856			0.0144986		0.0148791	0.0144986
	69.8	0.88		0.934702			0.0126074		0.0133912	0.0126074
	69.8	0.795		0.843341			0.0113897		0.0120822	0.0113897
	69.8	0.783		0.773547			0.0112178		0.0110823	0.0112178
	69.8	0.723		0.709901			0.0103582		0.0101705	0.0103582
	69.8	0.702		0.65979			0.0100573		0.00945258	0.0100573
	69.8	0.64		0.61292			0.00916905		0.00878108	0.00916905
	120.22	2.27		2.50256			0.018882		0.0208165	0.018882
	120.22	1.79		1.98573			0.0148894		0.0165174	0.0148894
	120.22	1.59		1.63113			0.0132258		0.0135679	0.0132258
	120.22	1.315		1.38399			0.0109383		0.0115122	0.0109383
	120.22	1.13		1.20189			0.00939943		0.0099974	0.00939943
	120.22	1.023		1.06213			0.0085094		0.00883491	0.0085094
	120.22	0.93		0.951494			0.00773582		0.00791461	0.00773582
	120.22	0.836		0.861731			0.00695392		0.00716795	0.00695392
	120.22	0.752		0.787443			0.0062552		0.00655002	0.0062552
	120.22	0.738		0.724948			0.00613875		0.00603018	0.00613875
	120.22	0.67		0.671643			0.00557312		0.00558678	0.00557312
	120.22	0.63		0.62564			0.00524039		0.00520413	0.00524039
	120.22	0.598		0.585535			0.00497421		0.00487053	0.00497421
	120.22	0.57		0.550262			0.00474131		0.00457712	0.00474131
	120.22	0.553		0.518997			0.0045999		0.00431706	0.0045999
	120.22	0.547		0.500512			0.00454999		0.0041633	0.00454999
	117.15	2.8		3.01732			0.023901		0.025756	0.023901
	117.15	2.5		2.6973			0.0213402		0.0230243	0.0213402
	117.15	2.18		2.34239			0.0186086		0.0199948	0.0186086
	117.15	1.66		1.76259			0.0141699		0.0150456	0.0141699
	117.15	1.38		1.41287			0.0117798		0.0120604	0.0117798
	117.15	1.163		1.17895			0.00992744		0.0100636	0.00992744
	117.15	0.983		1.01149			0.00839095		0.00863412	0.00839095
	117.15	0.874		0.88568			0.00746052		0.00756022	0.00746052
	117.15	0.783		0.787707			0.00668374		0.00672391	0.00668374
	117.15	0.714		0.70925			0.00609475		0.0060542	0.00609475
	117.15	0.66		0.645006			0.0056338		0.00550581	0.0056338
	117.15	0.608		0.591434			0.00518993		0.00504852	0.00518993
	117.15	0.575		0.546079			0.00490824		0.00466136	0.00490824
	116.83	2.8		3.03281			0.0239664		0.0259592	0.0239664
	116.83	2.69		2.93172			0.0230249		0.0250939	0.0230249
	116.83	2.02		2.06945			0.0172901		0.0177133	0.0172901
	116.83	1.576		1.59912			0.0134897		0.0136876	0.0134897
	116.83	1.226		1.30298			0.0104939		0.0111528	0.0104939
	116.83	1.054		1.09939			0.00902166		0.0094102	0.00902166
	116.83	0.882		0.950827			0.00754943		0.00813855	0.00754943
	116.83	0.788		0.837633			0.00674484		0.00716967	0.00674484
	116.83	0.704		0.748523			0.00602585		0.00640694	0.00602585
	116.83	0.762		0.67655			0.0065223		0.00579089	0.0065223
	116.83	0.599		0.617203			0.00512711		0.00528292	0.00512711
	116.83	0.588		0.567429			0.00503295		0.00485688	0.00503295
	116.83	0.595		0.525083			0.00509287		0.00449442	0.00509287
	116.83	0.597		0.488619			0.00510999		0.00418231	0.00510999
	116.83	0.597		0.475413			0.00510999		0.00406927	0.00510999
	88.81	2.6		2.97935			0.029276		0.0335475	0.029276
	88.81	1.88		2.10847			0.0211688		0.0237413	0.0211688
	88.81	1.25		1.44263			0.014075		0.0162441	0.014075
	88.81	1.07		1.0964			0.0120482		0.0123455	0.0120482
	88.81	0.88		0.884195			0.00990879		0.00995603	0.00990879
	88.81	0.785		0.740812			0.00883909		0.00834154	0.00883909
	88.81	0.62		0.637443			0.0069812		0.0071776	0.0069812
	88.81	0.611		0.559389			0.00687986		0.00629871	0.00687986
	88.81	0.525		0.498365			0.0059115		0.00561158	0.0059115
	88.81	0.518		0.449345			0.00583268		0.00505962	0.00583268
	88.81	0.522		0.409105			0.00587772		0.00460652	0.00587772

## Sheet: Fig3aThickness Trend Lines
This calculates sheet thickness, max length and max width for a converging nozzle					Length Comparison				μm	Nozzle Label		57μm	69.8μm	76.46μm	81.8μm	88.81μm	95.36μm	116.83μm	117.15μm	120.22μm	137.68μm	141.61μm	144μm								5μm	10μm	15μm	20μm	25μm	30μm	35μm	40μm	45μm	50μm	55μm	60μm	65μm	70μm
Valid for					Nozzle	Length Measured	Length Theory			Nozzle Depth (um)					Nozzle Width (um)
d/w between .07 to 0.8					A03	#REF!	#REF!	#REF!		17		57	69.8	76.46	81.8	88.81	95.36	116.83	117.15	120.22	137.68	141.61	144								5	10	15	20	25	30	35	40	45	50	55	60	65	70
												17.17	18.4	17.16	18.18	17.67	16.68	17.24	17.4	17.4	16.22	16.71	16
										d/x^?	1	D04	A03	B06	A04	D01	A06	B03	B07	B05	C04	C02	B01
										1st term w/d	0	0	0	0	0	0	0	0	0	0	0	0	0								1473.9	736.95	491.3	368.475	294.78	245.65	210.557	184.238	163.767	147.39	133.991	122.825	113.377	105.279
										2nd term coeff 1.5	0	0	0	0	0	0	0	0	0	0	0	0	0								1558.9	906.95	746.3	708.475	719.78	755.65	805.557	864.238	928.767	997.39	1068.99	1142.83	1218.38	1295.28
										2nd term d/w power	0	1	1	1	1	1	1	1	1	1	1	1	1
										Third Term Constant	1	1	1	1	1	1	1	1	1	1	1	1	1
									Coefficient	0.36*(1+cot(.67theta))	0.399084	0.000871	0.000871	0.000871	0.000871	0.000871	0.000871	0.000871	0.000871	0.000871	0.000871	0.000871	0.000871								0.000786002	0.000786002	0.000786002	0.000786002	0.000786002	0.000786002	0.000786002	0.000786002	0.000786002	0.000786002	0.000786002	0.000786002	0.000786002	0.000786002
Re between 74.7 – 3820					D04	#REF!	#REF!	#REF!		Distance from Nozzle	Thickness (um)
theta between 45˚ and 85˚					C02	#REF!	#REF!	#REF!		0.35		2.43554	3.19612	3.26514	3.70081	3.90525	3.95833	5.01235	5.07273	5.20566	5.5574	5.88871	5.73367	#DIV/0!	#DIV/0!	#DIV/0!	#DIV/0!	#DIV/0!	#DIV/0!	#DIV/0!
					B06	#REF!	#REF!	#REF!		0.475		1.79461	2.35504	2.40589	2.72692	2.87755	2.91667	3.69331	3.7378	3.83575	4.09493	4.33905	4.22481	#DIV/0!	#DIV/0!	#DIV/0!	#DIV/0!	#DIV/0!	#DIV/0!	#DIV/0!
d/w	0.224431				C04	#REF!	#REF!	#REF!		0.6		1.42073	1.8644	1.90466	2.15881	2.27806	2.30903	2.92387	2.95909	3.03664	3.24182	3.43508	3.34464	#DIV/0!	#DIV/0!	#DIV/0!	#DIV/0!	#DIV/0!	#DIV/0!	#DIV/0!
d	17.16	µm	nozzle depth (in plane of sheet)		B01	#REF!	#REF!	#REF!		0.725		1.17578	1.54296	1.57627	1.7866	1.88529	1.91092	2.41976	2.4489	2.51308	2.68288	2.84283	2.76798	#DIV/0!	#DIV/0!	#DIV/0!	#DIV/0!	#DIV/0!	#DIV/0!	#DIV/0!
w	76.46	µm	nozzle width (in plane of nozzle)		A04	#REF!	#REF!	#REF!		0.85		1.00287	1.31605	1.34447	1.52386	1.60804	1.6299	2.06391	2.08877	2.14351	2.28834	2.42476	2.36092	#DIV/0!	#DIV/0!	#DIV/0!	#DIV/0!	#DIV/0!	#DIV/0!	#DIV/0!
x	0.7	mm	distance from nozzle		A06	#REF!	#REF!	#REF!		0.975		0.874296	1.14733	1.1721	1.3285	1.40188	1.42094	1.79931	1.82098	1.8687	1.99496	2.1139	2.05824	#DIV/0!	#DIV/0!	#DIV/0!	#DIV/0!	#DIV/0!	#DIV/0!	#DIV/0!
theta	60	degree	converging angle		B05	#REF!	#REF!	#REF!		1.1		0.774945	1.01695	1.03891	1.17753	1.24258	1.25947	1.59484	1.61405	1.65635	1.76826	1.87368	1.82435	#DIV/0!	#DIV/0!	#DIV/0!	#DIV/0!	#DIV/0!	#DIV/0!	#DIV/0!
Q	2.47	ml/min	Flow rate		B07	#REF!	#REF!	#REF!		1.225		0.695869	0.913178	0.932897	1.05738	1.11578	1.13095	1.4321	1.44935	1.48733	1.58783	1.68249	1.63819	#DIV/0!	#DIV/0!	#DIV/0!	#DIV/0!	#DIV/0!	#DIV/0!	#DIV/0!
surface tension	0.072	N/m			B03	#REF!	#REF!	#REF!		1.35		0.631436	0.828624	0.846518	0.95947	1.01247	1.02623	1.2995	1.31515	1.34962	1.44081	1.5267	1.48651	#DIV/0!	#DIV/0!	#DIV/0!	#DIV/0!	#DIV/0!	#DIV/0!	#DIV/0!
viscosity	0.0009	Pa s			D01	#REF!	#REF!	#REF!		1.475		0.577925	0.758402	0.774779	0.878159	0.926669	0.939266	1.18937	1.2037	1.23524	1.31871	1.39732	1.36053	#DIV/0!	#DIV/0!	#DIV/0!	#DIV/0!	#DIV/0!	#DIV/0!	#DIV/0!
density	1000	kg/m^3			C04 R	0	0	0		1.6		0.532774	0.699152	0.714249	0.809553	0.854273	0.865885	1.09645	1.10966	1.13874	1.21568	1.28816	1.25424	#DIV/0!	#DIV/0!	#DIV/0!	#DIV/0!	#DIV/0!	#DIV/0!	#DIV/0!
D	100	µm	X-ray beam diameter (µm)		D01 R	0	0	0		1.725		0.494168	0.648489	0.662492	0.75089	0.792369	0.80314	1.017	1.02925	1.05622	1.12759	1.19481	1.16335	#DIV/0!	#DIV/0!	#DIV/0!	#DIV/0!	#DIV/0!	#DIV/0!	#DIV/0!
					B01 R	0	0	0	0.162345	1.85		0.460778	0.604672	0.617729	0.700154	0.738831	0.748874	0.948283	0.959705	0.984855	1.0514	1.11408	1.08475	#DIV/0!	#DIV/0!	#DIV/0!	#DIV/0!	#DIV/0!	#DIV/0!	#DIV/0!
										1.975		0.431615	0.566401	0.578632	0.655841	0.692069	0.701477	0.888265	0.898965	0.922523	0.984856	1.04357	1.01609	#DIV/0!	#DIV/0!	#DIV/0!	#DIV/0!	#DIV/0!	#DIV/0!	#DIV/0!
h(x-D/2)	1.70645	µm								2.1		0.405923	0.532687	0.54419	0.616802	0.650875	0.659722	0.835392	0.845455	0.867611	0.926234	0.981452	0.955611	#DIV/0!	#DIV/0!	#DIV/0!	#DIV/0!	#DIV/0!	#DIV/0!	#DIV/0!
h(x)	1.58456	µm								2.225		0.383119	0.502761	0.513617	0.582151	0.614309	0.622659	0.78846	0.797957	0.818868	0.874198	0.926315	0.901925	#DIV/0!	#DIV/0!	#DIV/0!	#DIV/0!	#DIV/0!	#DIV/0!	#DIV/0!
h(x+D/2)	1.47893	µm		0.230556						2.35		0.36274	0.476018	0.486297	0.551185	0.581633	0.589539	0.746521	0.755513	0.775312	0.827698	0.877043	0.853951	#DIV/0!	#DIV/0!	#DIV/0!	#DIV/0!	#DIV/0!	#DIV/0!	#DIV/0!
max width (Wm)	0.681686	mm								2.475		0.34442	0.451977	0.461737	0.523347	0.552257	0.559764	0.708818	0.717356	0.736154	0.785895	0.832747	0.810822	#DIV/0!	#DIV/0!	#DIV/0!	#DIV/0!	#DIV/0!	#DIV/0!	#DIV/0!
max length (Lm)	2.9567	mm								2.6		0.327861	0.430247	0.439538	0.498187	0.525706	0.532853	0.67474	0.682867	0.700762	0.748112	0.792712	0.77184	#DIV/0!	#DIV/0!	#DIV/0!	#DIV/0!	#DIV/0!	#DIV/0!	#DIV/0!
sheet width / sheet length	0.230556					x6 for B03 95.36um				2.725		0.312822	0.410511	0.419376	0.475334	0.501591	0.50841	0.643789	0.651543	0.668617	0.713795	0.756349	0.736434	#DIV/0!	#DIV/0!	#DIV/0!	#DIV/0!	#DIV/0!	#DIV/0!	#DIV/0!
						3.25746				2.85		0.299101	0.392506	0.400982	0.454486	0.479592	0.486111	0.615552	0.622967	0.639292	0.682488	0.723175	0.704135	#DIV/0!	#DIV/0!	#DIV/0!	#DIV/0!	#DIV/0!	#DIV/0!	#DIV/0!
										2.975		0.286534	0.376014	0.384134	0.43539	0.459441	0.465686	0.589689	0.596792	0.612431	0.653812	0.69279	0.674549	#DIV/0!	#DIV/0!	#DIV/0!	#DIV/0!	#DIV/0!	#DIV/0!	#DIV/0!
										3.1		0.27498	0.360852	0.368645	0.417834	0.440915	0.446909	0.565911	0.572727	0.587736	0.627449	0.664855	0.64735	#DIV/0!	#DIV/0!	#DIV/0!	#DIV/0!	#DIV/0!	#DIV/0!	#DIV/0!
										3.225		0.264322	0.346866	0.354356	0.401639	0.423825	0.429587	0.543976	0.550529	0.564956	0.603129	0.639085	0.622259	#DIV/0!	#DIV/0!	#DIV/0!	#DIV/0!	#DIV/0!	#DIV/0!	#DIV/0!
						2.18334				3.35		0.254459	0.333923	0.341134	0.386652	0.408011	0.413557	0.523679	0.529987	0.543875	0.580624	0.615239	0.59904	#DIV/0!	#DIV/0!	#DIV/0!	#DIV/0!	#DIV/0!	#DIV/0!	#DIV/0!
										3.475		0.245306	0.321912	0.328863	0.372744	0.393334	0.398681	0.504841	0.510922	0.524311	0.559738	0.593108	0.577492	#DIV/0!	#DIV/0!	#DIV/0!	#DIV/0!	#DIV/0!	#DIV/0!	#DIV/0!
										3.6		0.236789	0.310734	0.317444	0.359801	0.379677	0.384838	0.487312	0.493182	0.506106	0.540303	0.572514	0.55744	#DIV/0!	#DIV/0!	#DIV/0!	#DIV/0!	#DIV/0!	#DIV/0!	#DIV/0!
										3.725		0.228843	0.300307	0.306792	0.347728	0.366936	0.371924	0.470959	0.476632	0.489123	0.522172	0.553302	0.538734	#DIV/0!	#DIV/0!	#DIV/0!	#DIV/0!	#DIV/0!	#DIV/0!	#DIV/0!
										3.85		0.221413	0.290557	0.296831	0.336438	0.355022	0.359849	0.455669	0.461157	0.473242	0.505218	0.535338	0.521243	#DIV/0!	#DIV/0!	#DIV/0!	#DIV/0!	#DIV/0!	#DIV/0!	#DIV/0!
										3.975		0.21445	0.28142	0.287497	0.325858	0.343858	0.348533	0.441339	0.446655	0.45836	0.489331	0.518503	0.504851	#DIV/0!	#DIV/0!	#DIV/0!	#DIV/0!	#DIV/0!	#DIV/0!	#DIV/0!
										4.1		0.207912	0.27284	0.278731	0.315923	0.333375	0.337907	0.427884	0.433038	0.444386	0.474412	0.502695	0.48946	#DIV/0!	#DIV/0!	#DIV/0!	#DIV/0!	#DIV/0!	#DIV/0!	#DIV/0!
					0.000871					4.225		0.201761	0.264768	0.270485	0.306576	0.323512	0.327909	0.415225	0.420226	0.431238	0.460377	0.487822	0.474978	#DIV/0!	#DIV/0!	#DIV/0!	#DIV/0!	#DIV/0!	#DIV/0!	#DIV/0!
										Q	3.3	Experimental	Uncertainty (Δ)		3.75
										w0 [um]	88.81				141.61
										d [um]	17.67	4.3	0.162994		16.71
										D01	x distance [mm]		0.0426138	C02	x distance [mm]
										x1	0.45		0.187353		0.91	2.42
										x2	0.46	2.6	0.180335		1.21	1.595
										x3	0.65	1.88	0.10163		1.51	1.335
										x4	0.95	1.25	0.0578519		1.81	1.139
										x5	1.25	1.07	0.0401681		2.11	0.99
										x6	1.55	0.88	0.0308213		2.41	0.84
										x7	1.85	0.785	0.0250631		2.71	0.82
										x8	2.15	0.62	0.0211561		3.01	0.745
										x9	2.45	0.611	0.0180244		3.11	0.684
										x10	2.75	0.525	0.0161775		3.21	0.675
										x11	3.05	0.518	0.0144887		3.31	0.673
										x12	3.35	0.522	0.0131247		3.41	0.606
										x13	3.65	NA	0.0119992
										x14	3.95	NA	0.011054
										x15	4.25	NA	0.0102486
																		C02						B06						C04						B01						A04						A06
																		Q		[mL/min]				Q	2.65	[mL/min]				Q	2.65	[mL/min]				Q	4.3	[mL/min]				Q	3.2	[mL/min]				Q	3.2
																		w0		[um]				w0	76.46	[um]				w0	137.68	[um]				w0	144	[um]				w0	81.8	[um]				w0	95.36
																		d		[um]				d	17.16	[um]				d	16.22	[um]				d	16	[um]				d	18.18	[um]				d	16.68
																		x1		[mm]				x1	0.71	[mm]				x1	0.76	[mm]				x1	0.89	[mm]				x1	0.5	[mm]				x1	0.6
																		x2		[mm]				x2	0.79	[mm]				x2	0.84	[mm]				x2	1.04	[mm]				x2	0.68	[mm]				x2	0.63
																		x3		[mm]				x3	0.86	[mm]				x3	0.96	[mm]				x3	1.09	[mm]				x3	0.93	[mm]				x3	0.7
																		x4		[mm]				x4	1.01	[mm]				x4	1.16	[mm]				x4	1.34	[mm]				x4	1.18	[mm]				x4	0.9
																		x5		[mm]				x5	1.21	[mm]				x5	1.36	[mm]				x5	1.59	[mm]				x5	1.43	[mm]				x5	1.1
																		x6		[mm]				x6	1.41	[mm]				x6	1.56	[mm]				x6	1.84	[mm]				x6	1.68	[mm]				x6	1.3
																		x7		[mm]				x7	1.61	[mm]				x7	1.76	[mm]				x7	2.09	[mm]				x7	1.93	[mm]				x7	1.5
																		x8		[mm]				x8	1.81	[mm]				x8	1.96	[mm]				x8	2.34	[mm]				x8	2.18	[mm]				x8	1.7
																		x9		[mm]				x9	2.01	[mm]				x9	2.16	[mm]				x9	2.59	[mm]				x9	2.43	[mm]				x9	1.9
																		x10		[mm]				x10	2.21	[mm]				x10	2.36	[mm]				x10	2.84	[mm]				x10	2.68	[mm]				x10	2.1
																		x11		[mm]				x11	2.41	[mm]				x11	2.56	[mm]				x11	3.09	[mm]				x11	2.93	[mm]				x11	2.3
																		x12		[mm]				x12	2.61	[mm]				x12	2.76	[mm]				x12	3.34	[mm]				x12	3.18	[mm]				x12	2.5
																			Analytical	Experimental	Uncertainty (Δ)			x13	2.81	[mm]				x13	2.96	[mm]				x13	3.59	[mm]				x13	3.43	[mm]				x13	2.7
																		lj	3.85358	3.61	0.151723	[mm]		x14	3.01	[mm]				x14	3.16	[mm]				x14	3.84	[mm]				x14	3.68	[mm]				x14	2.9
																		wj	0.919202		0.0396411	[mm]			Analytical	Experimental	Uncertainty (Δ)			x15	3.36	[mm]				x15	4.09	[mm]				x15	3.93	[mm]				x15	3.1
																		h(x=x1)	2.08656		0.0884286	[um]		lj	3.30029	3.35	0.126183	[mm]		x16	3.46	[mm]				x16	4.34	[mm]				x16	4.18	[mm]				x16	3.3
																		h(x=x2)	1.56923		0.0601287	[um]		wj	0.748578		0.0333857	[mm]			Analytical	Experimental	Uncertainty (Δ)			x17	4.59	[mm]				x17	4.43	[mm]				x17	3.5
																		h(x=x3)	1.25746		0.045607	[um]		h(x=x1)	1.56225		0.0771391	[um]		lj	2.09904	3.35	0.0837854	[mm]			Analytical	Experimental	Uncertainty (Δ)				Analytical	Experimental	Uncertainty (Δ)				Analytical
																		h(x=x4)	1.04904		0.0368229	[um]		h(x=x2)	1.40404	1.43	0.065851	[um]		wj	0.5154		0.022459	[mm]		lj	5.12541	4.64	0.206079	[mm]		lj	4.22191	3.91	0.157746	[mm]		lj	4.0271
																		h(x=x5)	0.899889		0.0309347	[um]		h(x=x3)	1.28976	1.25	0.058301	[um]		h(x=x1)	2.35766		0.110164	[um]		wj	1.20414		0.0526201	[mm]		wj	0.952223		0.041521	[mm]		wj	0.926661
																		h(x=x6)	0.78787		0.0267057	[um]		h(x=x4)	1.09821	1.02	0.0467346	[um]		h(x=x2)	2.13312	2.3	0.0950862	[um]		h(x=x1)	2.07246		0.0905462	[um]		h(x=x1)	2.51098	2.2	0.150013	[um]		h(x=x1)	2.17933
																		h(x=x7)	0.700652		0.0235156	[um]		h(x=x5)	0.91669	0.842	0.0369546	[um]		h(x=x3)	1.86648	2.02	0.0787342	[um]		h(x=x2)	1.77354	2.05	0.0730745	[um]		h(x=x2)	1.84631	1.58	0.0908426	[um]		h(x=x2)	2.07555
																		h(x=x8)	0.630819		0.0210198	[um]		h(x=x6)	0.786663	0.7	0.0305953	[um]		h(x=x4)	1.54467	1.75	0.0611218	[um]		h(x=x3)	1.69219	2.02	0.0686505	[um]		h(x=x3)	1.34999	1.47	0.0571454	[um]		h(x=x3)	1.86799
																		h(x=x9)	0.610536		0.0202333	[um]		h(x=x7)	0.688941	0.62	0.0261378	[um]		h(x=x5)	1.31751	1.56	0.0499818	[um]		h(x=x4)	1.37648	1.56	0.0527369	[um]		h(x=x4)	1.06397	1.115	0.0414553	[um]		h(x=x4)	1.45288
																		h(x=x10)	0.591516		0.0196361	[um]		h(x=x8)	0.612815	0.601	0.0228394	[um]		h(x=x6)	1.1486	1.37	0.0423285	[um]		h(x=x5)	1.16005	1.288	0.0428909	[um]		h(x=x5)	0.877964	0.945	0.0325542	[um]		h(x=x5)	1.18872
																		h(x=x11)	0.573645		0.0190117	[um]		h(x=x9)	0.551838	0.48	0.0199282	[um]		h(x=x7)	1.01808	1.235	0.0367501	[um]		h(x=x6)	1.00244	1.18	0.0362046	[um]		h(x=x6)	0.747314	0.775	0.026848	[um]		h(x=x6)	1.00584
																		h(x=x12)	0.556823		0.0184264	[um]		h(x=x10)	0.501898	0.47	0.0182778	[um]		h(x=x8)	0.914193	1.1	0.0325015	[um]		h(x=x7)	0.882529	0.996	0.0313625	[um]		h(x=x7)	0.650512	0.61	0.0228793	[um]		h(x=x7)	0.871731
																								h(x=x11)	0.460247	0.466	0.0166318	[um]		h(x=x9)	0.829546	1.01	0.0286796	[um]		h(x=x8)	0.788242	0.914	0.027689	[um]		h(x=x8)	0.575912	0.585	0.0199563	[um]		h(x=x8)	0.769174
																								h(x=x12)	0.424979	0.413	0.0152638	[um]		h(x=x10)	0.759245	0.906	0.0264483	[um]		h(x=x9)	0.712157	0.785	0.0245074	[um]		h(x=x9)	0.516662	0.584	0.0174504	[um]		h(x=x9)	0.688209
																								h(x=x13)	0.394731	0.405	0.014108	[um]		h(x=x11)	0.699929	0.88	0.0242122	[um]		h(x=x10)	0.649467	0.807	0.0224728	[um]		h(x=x10)	0.468466	0.43	0.0159295	[um]		h(x=x10)	0.622665
																								h(x=x14)	0.368503	0.345	0.0131181	[um]		h(x=x12)	0.64921	0.822	0.0223323	[um]		h(x=x11)	0.596921	0.724	0.0205505	[um]		h(x=x11)	0.428494	0.44	0.0144805	[um]		h(x=x11)	0.56852
																														h(x=x13)	0.605344	0.762	0.0207289	[um]		h(x=x12)	0.552241	0.638	0.0189365	[um]		h(x=x12)	0.394808	0.43	0.0132777	[um]		h(x=x12)	0.523038
																														h(x=x14)	0.567031	0.74	0.0193444	[um]		h(x=x13)	0.513784	0.627	0.0175613	[um]		h(x=x13)	0.366032	0.417	0.0122626	[um]		h(x=x13)	0.484295
																														h(x=x15)	0.53328	0.69	0.0181364	[um]		h(x=x14)	0.480335	0.59	0.016375	[um]		h(x=x14)	0.341165	NA	0.011394	[um]		h(x=x14)	0.450895
																														h(x=x16)	0.517867	0.685	0.0175882	[um]		h(x=x15)	0.450975	0.45	0.0153408	[um]		h(x=x15)	0.319463	NA	0.010642	[um]		h(x=x15)	0.421805
																																				h(x=x16)	0.424997		0.014431	[um]		h(x=x16)	0.300356	NA	0.0099843	[um]		h(x=x16)	0.396241
																																				h(x=x17)	0.401849		0.0136242	[um]		h(x=x17)	0.283406	NA	0.00940411	[um]		h(x=x17)	0.373599
																		A03						D04						B05						B07						B03
																		Q	2.47	[mL/min]				Q	1.9	[mL/min]				Q	3.6	[mL/min]				Q	3.6	[mL/min]				Q	3.6	[mL/min]
																		w0	69.8	[um]				w0	57	[um]				w0	120.22	[um]				w0	117.15	[um]				w0	116.83	[um]
																		d	18.4	[um]				d	17.17	[um]				d	17.4	[um]				d	17.4	[um]				d	17.24	[um]
																		x1	0.7	[mm]				x1	0.24	[mm]				x1	0.72	[mm]				x1	0.51	[mm]				x1	0.57	[mm]
																		x2	0.83	[mm]				x2	0.44	[mm]				x2	0.73	[mm]				x2	0.59	[mm]				x2	0.58	[mm]
																		x3	0.98	[mm]				x3	0.64	[mm]				x3	0.92	[mm]				x3	0.66	[mm]				x3	0.6	[mm]
																		x4	1.08	[mm]				x4	0.84	[mm]				x4	1.12	[mm]				x4	0.76	[mm]				x4	0.85	[mm]
																		x5	1.2	[mm]				x5	1.04	[mm]				x5	1.32	[mm]				x5	1.01	[mm]				x5	1.1	[mm]
																		x6	1.33	[mm]				x6	1.24	[mm]				x6	1.52	[mm]				x6	1.26	[mm]				x6	1.35	[mm]
																		x7	1.45	[mm]				x7	1.44	[mm]				x7	1.72	[mm]				x7	1.51	[mm]				x7	1.6	[mm]
																		x8	1.58	[mm]				x8	1.64	[mm]				x8	1.92	[mm]				x8	1.76	[mm]				x8	1.85	[mm]
																		x9	1.7	[mm]				x9	1.84	[mm]				x9	2.12	[mm]				x9	2.01	[mm]				x9	2.1	[mm]
																		x10	1.83	[mm]				x10	2.04	[mm]				x10	2.32	[mm]				x10	2.26	[mm]				x10	2.35	[mm]
																			Analytical	Experimental	Uncertainty (Δ)				Analytical	Experimental	Uncertainty (Δ)			x11	2.52	[mm]				x11	2.51	[mm]				x11	2.6	[mm]
																		lj	2.90499	2.12	0.107147	[mm]		lj	2.22177	2.25	0.083454	[mm]		x12	2.72	[mm]				x12	2.76	[mm]				x12	2.85	[mm]
																		wj	0.653495		0.0289361	[mm]		wj	0.492276		0.0228798	[mm]		x13	2.92	[mm]				x13	3.01	[mm]				x13	3.1	[mm]
																		h(x=x1)	1.59243	1.537	0.0782843	[um]		h(x=x1)	3.64147	1.43	0.403295	[um]		x14	3.12	[mm]				x14	3.26	[mm]				x14	3.35	[mm]
																		h(x=x2)	1.34301	1.23	0.0607847	[um]		h(x=x2)	1.98626	1.07	0.135347	[um]	105.81	x15	3.32	[mm]				x15	3.51	[mm]				x15	3.6	[mm]
																		h(x=x3)	1.13745	1.087	0.0481504	[um]		h(x=x3)	1.36555	0.825	0.0740534	[um]		x16	3.52	[mm]				x16	3.76	[mm]				x16	3.7	[mm]
																		h(x=x4)	1.03213	1.012	0.0422677	[um]		h(x=x4)	1.04042	0.743	0.0499049	[um]		x17	3.65	[mm]				x17	4.01	[mm]					Analytical	Experimental	Uncertainty (Δ)
																		h(x=x5)	0.928919	0.88	0.0368682	[um]		h(x=x5)	0.84034	0.602	0.0375136	[um]			Analytical	Experimental	Uncertainty (Δ)				Analytical	Experimental	Uncertainty (Δ)			lj	4.09893	3.87	0.158537	[mm]
																		h(x=x6)	0.838122	0.795	0.0324012	[um]		h(x=x6)	0.704801	0.513	0.0300798	[um]		lj	3.96406	3.71	0.152773	[mm]		lj	4.05415	3.66	0.15616	[mm]		wj	0.960507		0.0413829	[mm]
																		h(x=x7)	0.76876	0.783	0.029157	[um]		h(x=x7)	0.606912	0.448	0.0251439	[um]		wj	0.932987		0.0400313	[mm]		wj	0.950957		0.0408564	[mm]		h(x=x1)	2.86813		0.155799	[um]
																		h(x=x8)	0.705508	0.723	0.0263181	[um]		h(x=x8)	0.532899	0.372	0.021629	[um]		h(x=x1)	2.35534		0.110735	[um]		h(x=x1)	3.24552		0.189631	[um]		h(x=x2)	2.81868	2.8	0.151397	[um]
																		h(x=x9)	0.655707	0.702	0.0236625	[um]		h(x=x9)	0.474975	0.35	0.0186221	[um]		h(x=x2)	2.32308	2.27	0.108404	[um]		h(x=x2)	2.80545	2.8	0.148621	[um]		h(x=x3)	2.72473	2.69	0.143228	[um]
																		h(x=x10)	0.609127	0.64	0.0221963	[um]		h(x=x10)	0.428409	0.3	0.0169487	[um]		h(x=x3)	1.84331	1.79	0.0769599	[um]		h(x=x3)	2.5079	2.5	0.124028	[um]		h(x=x4)	1.92334	2.02	0.0836626	[um]
																														h(x=x4)	1.51415	1.59	0.0587006	[um]		h(x=x4)	2.17791	2.18	0.0996388	[um]		h(x=x5)	1.48621	1.576	0.0583916	[um]
																														h(x=x5)	1.28473	1.315	0.0474381	[um]		h(x=x5)	1.63882	1.66	0.0660358	[um]		h(x=x6)	1.21099	1.226	0.0448233	[um]
																														h(x=x6)	1.11569	1.13	0.0398417	[um]		h(x=x6)	1.31366	1.38	0.0492342	[um]		h(x=x7)	1.02177	1.054	0.0364305	[um]
																														h(x=x7)	0.985957	1.023	0.0343812	[um]		h(x=x7)	1.09617	1.163	0.0392955	[um]		h(x=x8)	0.883695	0.882	0.0307355	[um]
																														h(x=x8)	0.883253	0.93	0.0302669	[um]		h(x=x8)	0.940462	0.983	0.0327511	[um]		h(x=x9)	0.778493	0.788	0.0260238	[um]
																														h(x=x9)	0.799927	0.836	0.0265508	[um]		h(x=x9)	0.823489	0.874	0.0274083	[um]		h(x=x10)	0.695675	0.704	0.0234913	[um]
																														h(x=x10)	0.730968	0.752	0.024472	[um]		h(x=x10)	0.732395	0.783	0.0246562	[um]		h(x=x11)	0.628783	0.762	0.0210388	[um]
																														h(x=x11)	0.672955	0.738	0.0223512	[um]		h(x=x11)	0.659447	0.714	0.0219723	[um]		h(x=x12)	0.573627	0.599	0.0190599	[um]
																														h(x=x12)	0.623473	0.67	0.0205764	[um]		h(x=x12)	0.599715	0.66	0.0198271	[um]		h(x=x13)	0.527366	0.588	0.017428	[um]
																														h(x=x13)	0.580769	0.63	0.0190685	[um]		h(x=x13)	0.549905	0.608	0.0180713	[um]		h(x=x14)	0.488011	0.595	0.0160583	[um]
																														h(x=x14)	0.54354	0.598	0.0177707	[um]		h(x=x14)	0.507734	0.575	0.0166067	[um]		h(x=x15)	0.454121	0.597	0.0148915	[um]
																														h(x=x15)	0.510797	0.57	0.0166415	[um]		h(x=x15)	0.471571	NA	0.0153656	[um]		h(x=x16)	0.441848	0.597	0.0144717	[um]
																																	h(x=x16)	0.481774	0.553	0.0156496	[um]		h(x=x16)	0.440216	NA	0.0142998	[um]
																																	h(x=x17)	0.464615	0.547	0.0150669	[um]		h(x=x17)	0.412771	NA	0.0133743	[um]
[truncated: 3 more columns]

## Sheet: Error Calculations for Ha
Evaluate Error				Partial Derivatives		Error Term
ρ	998	[kg/m^3]		dlj/dρ	3.8613e-06	((dlj/dρ)*wρ)^2	5.94004e-11
μ	0.001	[Pa*s]		dlj/dμ	-0.385358	((dlj/dρ)*wμ)^2	2.13841e-09
σ	0.0729	[N/m]		dlj/dσ	-0.0475751	((dlj/dρ)*wσ)^2	4.81143e-09
θ	1.0472	[rad]		dlj/dQ	117149	((dlj/dρ)*wQ)^2	5.36088e-09
Q	6.25001e-08	[m^3/s]		dlj/dd	202.836	((dlj/dρ)*wd)^2	1.02856e-08
w0	0.00014161	[m]		dlj/dw0	-23.9346	((dlj/dρ)*ww0)^2	1.43217e-10
d	1.671e-05	[m]		dlj/dθ	0.00141923	((dlj/dρ)*wθ)^2	2.20883e-10
x1	0.00091	[m]
x2	0.00121	[m]		lj	0.00385358	wlj	0.000151723
x3	0.00151	[m]
x4	0.00181	[m]		Partial Derivatives		Error Term
x5	0.00211	[m]		dwj/dρ	9.21044e-07	((dwj/dρ)*wρ)^2	3.37973e-12
x6	0.00241	[m]		dwj/dμ	-0.18384	((dwj/dρ)*wμ)^2	4.86681e-10
x7	0.00271	[m]		dwj/dσ	-0.0100873	((dwj/dρ)*wσ)^2	2.16303e-10
x8	0.00301	[m]		dwj/dQ	26473	((dwj/dρ)*wQ)^2	2.73758e-10
x9	0.00311	[m]		dwj/dd	-46.2581	((dwj/dρ)*wd)^2	5.34954e-10
x10	0.00321	[m]		dwj/dw0	4.92727	((dwj/dρ)*ww0)^2	6.06949e-12
x11	0.00331	[m]		dwj/dθ	0.000677062	((dwj/dρ)*wθ)^2	5.02707e-11
x12	0.00341	[m]
x13	0	[m]		wj	0.000919202	wwj	3.96411e-05
x14	0	[m]
x15	0	[m]		Partial Derivatives	x1	x2	x3	x4	x5	x6	x7	x8	x9	x10	x11	x12	x13	x14	x15	x16	x17
x16	0	[m]		dh/dd	0.129978	0.0977521	0.0783311	0.0653481	0.0560569	0.0490788	0.0436458	0.0392957	0.0380322	0.0368474	0.0357341	0.0346862	#DIV/0!	#DIV/0!	#DIV/0!	#DIV/0!	#DIV/0!
x17	0	[m]		dh/dw0	0.014295	0.0107508	0.00861487	0.00718699	0.00616515	0.0053977	0.00480017	0.00432175	0.00418278	0.00405248	0.00393005	0.0038148	#DIV/0!	#DIV/0!	#DIV/0!	#DIV/0!	#DIV/0!
… Δρ	0.2	[%]		dh/dθ	-1.53691e-06	-1.15586e-06	-9.26216e-07	-7.727e-07	-6.62837e-07	-5.80326e-07	-5.16084e-07	-4.64647e-07	-4.49706e-07	-4.35697e-07	-4.22534e-07	-4.10143e-07	#DIV/0!	#DIV/0!	#DIV/0!	#DIV/0!	#DIV/0!
… Δμ	12	[%]		dh/dx	-0.00229292	-0.00129688	-0.000832756	-0.000579581	-0.000426488	-0.000326917	-0.000258543	-0.000209575	-0.000184273	-0.000184273	-0.000173307	-0.000163291	#DIV/0!	#DIV/0!	#DIV/0!	#DIV/0!	#DIV/0!
… Δσ	2	[%]		Error Term	x1	x2	x3	x4	x5	x6	x7	x8	x9	x10	x11	x12	x13	x14	x15	x16	x17
… Δθ	1	[%]		((dh/dd)*wd)^2	4.22357e-15	2.38887e-15	1.53394e-15	1.06759e-15	7.85594e-16	6.02183e-16	4.76238e-16	3.86038e-16	3.61611e-16	3.39432e-16	3.19232e-16	3.00784e-16	#DIV/0!	#DIV/0!	#DIV/0!	#DIV/0!	#DIV/0!
… ΔQ	1	[%]		((dh/dw0)*ww0)^2	5.10868e-17	2.88949e-17	1.8554e-17	1.29132e-17	9.50226e-18	7.28379e-18	5.76041e-18	4.66937e-18	4.37392e-18	4.10565e-18	3.86132e-18	3.63817e-18	#DIV/0!	#DIV/0!	#DIV/0!	#DIV/0!	#DIV/0!
… Δw0	5e-07	[um]		((dh/dθ)*wθ)^2	2.59032e-16	1.46509e-16	9.40767e-17	6.54755e-17	4.81805e-17	3.69319e-17	2.92077e-17	2.36757e-17	2.21776e-17	2.08174e-17	1.95785e-17	1.84471e-17	#DIV/0!	#DIV/0!	#DIV/0!	#DIV/0!	#DIV/0!
… Δd	5e-07	[um]		((dh/dx)*wx)^2	3.28592e-15	1.05119e-15	4.33426e-16	2.09947e-16	1.13682e-16	6.67967e-17	4.17778e-17	2.74509e-17	2.12228e-17	2.12228e-17	1.8772e-17	1.6665e-17	#DIV/0!	#DIV/0!	#DIV/0!	#DIV/0!	#DIV/0!
… Δx	2.5e-05	[m]
				h	2.08656e-06	1.56923e-06	1.25746e-06	1.04904e-06	8.99889e-07	7.8787e-07	7.00652e-07	6.30819e-07	6.10536e-07	5.91516e-07	5.73645e-07	5.56823e-07	#DIV/0!	#DIV/0!	#DIV/0!	#DIV/0!	#DIV/0!
				wh	8.84286e-08	6.01287e-08	4.5607e-08	3.68229e-08	3.09347e-08	2.67057e-08	2.35156e-08	2.10198e-08	2.02333e-08	1.96361e-08	1.90117e-08	1.84264e-08	#DIV/0!	#DIV/0!	#DIV/0!	#DIV/0!	#DIV/0!

## Sheet: RGB
Distance	x	h	Blue	Green	Red								Blue	Green	Red
Pixel	mm	nm	normalized	normalized	normalized	#REF!	#REF!	#REF!					ImageJ raw	ImageJ raw	ImageJ raw
0	4.1	308.956	0.0235294	0.0196078	0.027451	#REF!	#REF!	#REF!	0	TRUE	0	TRUE	6	5	7
1	4.098	309.107	0.0235294	0.019702	0.0238196	#REF!	#REF!	#REF!	0.333333	FALSE			6	5.024	6.074
2	4.096	309.258	0.0235294	0.0199922	0.024102	#REF!	#REF!	#REF!	0.666667	FALSE			6	5.098	6.146
3	4.094	309.409	0.0235294	0.0201804	0.0221961	#REF!	#REF!	#REF!	1	TRUE	0.75	FALSE	6	5.146	5.66
4	4.092	309.56	0.0313573	0.0246706	0.023051	#REF!	#REF!	#REF!	1.33333	FALSE			7.9961	6.291	5.878
5	4.09	309.712	0.0313725	0.0293529	0.0267765	#REF!	#REF!	#REF!	1.66667	FALSE			8	7.485	6.828
6	4.08799	309.863	0.0235525	0.0336588	0.0282196	#REF!	#REF!	#REF!	2	TRUE	1.5	FALSE	6.0059	8.583	7.196
7	4.08599	310.015	0.0235294	0.0406314	0.0401412	#REF!	#REF!	#REF!	2.33333	FALSE			6	10.361	10.236
8	4.08399	310.167	0.0196231	0.0492314	0.0419961	#REF!	#REF!	#REF!	2.66667	FALSE			5.0039	12.554	10.709
9	4.08199	310.319	0.0196078	0.0526	0.0589569	#REF!	#REF!	#REF!	3	TRUE	2.25	FALSE	5	13.413	15.034
10	4.07999	310.471	0.0235102	0.0614667	0.0612235	#REF!	#REF!	#REF!	3.33333	FALSE			5.9951	15.674	15.612
11	4.07799	310.624	0.0235294	0.0724549	0.0772235	#REF!	#REF!	#REF!	3.66667	FALSE			6	18.476	19.692
12	4.07599	310.776	0.0235294	0.0893451	0.0796902	#REF!	#REF!	#REF!	4	TRUE	3	TRUE	6	22.783	20.321
13	4.07399	310.929	0.0235294	0.0995216	0.091298	#REF!	#REF!	#REF!	4.33333	FALSE			6	25.378	23.281
14	4.07199	311.081	0.0235294	0.115455	0.0935569	#REF!	#REF!	#REF!	4.66667	FALSE			6	29.441	23.857
15	4.06999	311.234	0.0235294	0.134843	0.124816	#REF!	#REF!	#REF!	5	TRUE	3.75	FALSE	6	34.385	31.828
16	4.06798	311.388	0.0157475	0.148851	0.127616	#REF!	#REF!	#REF!	5.33333	FALSE			4.0156	37.957	32.542
17	4.06598	311.541	0.0156863	0.166988	0.224518	#REF!	#REF!	#REF!	5.66667	FALSE			4	42.582	57.252
18	4.06398	311.694	0.0195733	0.181459	0.232102	#REF!	#REF!	#REF!	6	TRUE	4.5	FALSE	4.9912	46.272	59.186
19	4.06198	311.848	0.0196078	0.164427	0.335675	#REF!	#REF!	#REF!	6.33333	FALSE			5	41.929	85.597
20	4.05998	312.001	0.0157247	0.134804	0.346243	#REF!	#REF!	#REF!	6.66667	FALSE			4.0098	34.375	88.292
21	4.05798	312.155	0.0156863	0.0946431	0.209302	#REF!	#REF!	#REF!	7	TRUE	5.25	FALSE	4	24.134	53.372
22	4.05598	312.309	0.0234451	0.0633725	0.211518	#REF!	#REF!	#REF!	7.33333	FALSE			5.9785	16.16	53.937
23	4.05398	312.463	0.0235294	0.0411882	0.0695608	#REF!	#REF!	#REF!	7.66667	FALSE			6	10.503	17.738
24	4.05198	312.618	0.015778	0.0292118	0.0676196	#REF!	#REF!	#REF!	8	TRUE	6	TRUE	4.0234	7.449	17.243
25	4.04998	312.772	0.0156863	0.0274706	0.0285961	#REF!	#REF!	#REF!	8.33333	FALSE			4	7.005	7.292
26	4.04797	312.927	0.019558	0.0235804	0.0278314	#REF!	#REF!	#REF!	8.66667	FALSE			4.9873	6.013	7.097
27	4.04597	313.082	0.0196078	0.0209804	0.0235804	#REF!	#REF!	#REF!	9	TRUE	6.75	FALSE	5	5.35	6.013
28	4.04397	313.236	0.0196078	0.0196235	0.0235294	#REF!	#REF!	#REF!	9.33333	FALSE			5	5.004	6
29	4.04197	313.391	0.0196078	0.0196078	0.0207922	#REF!	#REF!	#REF!	9.66667	FALSE			5	5	5.302
30	4.03997	313.547	0.0234722	0.0157451	0.0206588	#REF!	#REF!	#REF!	10	TRUE	7.5	FALSE	5.9854	4.015	5.268
31	4.03797	313.702	0.0235294	0.0156863	0.0137804	#REF!	#REF!	#REF!	10.3333	FALSE			6	4	3.514
32	4.03597	313.858	0.0235294	0.0195451	0.0134824	#REF!	#REF!	#REF!	10.6667	FALSE			6	4.984	3.438
33	4.03397	314.013	0.0235294	0.0188549	0.0195059	#REF!	#REF!	#REF!	11	TRUE	8.25	FALSE	6	4.808	4.974
34	4.03197	314.169	0.0235294	0.0157412	0.0196078	#REF!	#REF!	#REF!	11.3333	FALSE			6	4.014	5
35	4.02997	314.325	0.0235294	0.0118314	0.0151922	#REF!	#REF!	#REF!	11.6667	FALSE			6	3.017	3.874
36	4.02796	314.481	0.0235294	0.0117647	0.0152078	#REF!	#REF!	#REF!	12	TRUE	9	TRUE	6	3	3.878
37	4.02596	314.638	0.0235294	0.0117647	0.00835294	#REF!	#REF!	#REF!	12.3333	FALSE			6	3	2.13
38	4.02396	314.794	0.0235239	0.0156118	0.00812941	#REF!	#REF!	#REF!	12.6667	FALSE			5.9986	3.981	2.073
39	4.02196	314.951	0.0234204	0.0195333	0.0118784	#REF!	#REF!	#REF!	13	TRUE	9.75	FALSE	5.9722	4.981	3.029
40	4.01996	315.107	0.0196804	0.0196078	0.0118588	#REF!	#REF!	#REF!	13.3333	FALSE			5.0185	5	3.024
41	4.01796	315.264	0.0196078	0.0196078	0.0156078	#REF!	#REF!	#REF!	13.6667	FALSE			5	5	3.98
42	4.01596	315.421	0.0161773	0.023451	0.0156863	#REF!	#REF!	#REF!	14	TRUE	10.5	FALSE	4.1252	5.98	4
43	4.01396	315.579	0.0162086	0.0235294	0.0156863	#REF!	#REF!	#REF!	14.3333	FALSE			4.1332	6	4
44	4.01196	315.736	0.0130871	0.0243765	0.0156863	#REF!	#REF!	#REF!	14.6667	FALSE			3.3372	6.216	4
45	4.00996	315.894	0.0132231	0.0361882	0.0271922	#REF!	#REF!	#REF!	15	TRUE			3.3719	9.228	6.934
46	4.00796	316.051	0.0164494	0.0400235	0.027451	#REF!	#REF!	#REF!	15.3333	FALSE			4.1946	10.206	7
47	4.00595	316.209	0.0166224	0.0558196	0.0734314	#REF!	#REF!	#REF!	15.6667	FALSE			4.2387	14.234	18.725
48	4.00395	316.367	0.0157106	0.0647922	0.0745098	#REF!	#REF!	#REF!	16	TRUE			4.0062	16.522	19
49	4.00195	316.525	0.0156863	0.0702431	0.131925	#REF!	#REF!	#REF!	16.3333	FALSE			4	17.912	33.641
50	3.99995	316.684	0.0156863	0.0704706	0.133333	#REF!	#REF!	#REF!	16.6667	FALSE			4	17.97	34
51	3.99795	316.842	0.0156863	0.0712275	0.194518	#REF!	#REF!	#REF!	17	TRUE			4	18.163	49.602
52	3.99595	317.001	0.0180925	0.0725412	0.196078	#REF!	#REF!	#REF!	17.3333	FALSE			4.6136	18.498	50
53	3.99395	317.16	0.0180518	0.0710784	0.173157	#REF!	#REF!	#REF!	17.6667	FALSE			4.6032	18.125	44.155
54	3.99195	317.319	0.0157459	0.0699176	0.172549	#REF!	#REF!	#REF!	18	TRUE			4.0152	17.829	44
55	3.98995	317.478	0.0156863	0.0786353	0.115306	#REF!	#REF!	#REF!	18.3333	FALSE			4	20.052	29.403
56	3.98795	317.637	0.0176855	0.0838078	0.113725	#REF!	#REF!	#REF!	18.6667	FALSE			4.5098	21.371	29
57	3.98594	317.797	0.0176384	0.081251	0.1366	#REF!	#REF!	#REF!	19	TRUE			4.4978	20.719	34.833
58	3.98394	317.956	0.019549	0.0845176	0.137255	#REF!	#REF!	#REF!	19.3333	FALSE			4.985	21.552	35
59	3.98194	318.116	0.0196078	0.0915765	0.156298	#REF!	#REF!	#REF!	19.6667	FALSE			5	23.352	39.856
60	3.97994	318.276	0.0196078	0.0982863	0.156863	#REF!	#REF!	#REF!	20	TRUE			5	25.063	40
61	3.97794	318.436	0.0196078	0.107114	0.153059	#REF!	#REF!	#REF!	20.3333	FALSE			5	27.314	39.03
62	3.97594	318.596	0.0220188	0.113957	0.152941	#REF!	#REF!	#REF!	20.6667	FALSE			5.6148	29.059	39
63	3.97394	318.757	0.0221973	0.116937	0.141537	#REF!	#REF!	#REF!	21	TRUE			5.6603	29.819	36.092
64	3.97194	318.917	0.0223008	0.121196	0.141176	#REF!	#REF!	#REF!	21.3333	FALSE			5.6867	30.905	36
65	3.96994	319.078	0.0224039	0.129569	0.148773	#REF!	#REF!	#REF!	21.6667	FALSE			5.713	33.04	37.937
66	3.96794	319.239	0.0291086	0.134922	0.14902	#REF!	#REF!	#REF!	22	TRUE			7.4227	34.405	38
67	3.96593	319.4	0.0295353	0.135451	0.14902	#REF!	#REF!	#REF!	22.3333	FALSE			7.5315	34.54	38
68	3.96393	319.561	0.0343216	0.140918	0.14902	#REF!	#REF!	#REF!	22.6667	FALSE			8.752	35.934	38
69	3.96193	319.723	0.034582	0.152745	0.152808	#REF!	#REF!	#REF!	23	TRUE			8.8184	38.95	38.966
70	3.95993	319.884	0.0480725	0.149169	0.152941	#REF!	#REF!	#REF!	23.3333	FALSE			12.2585	38.038	39
71	3.95793	320.046	0.0489592	0.145235	0.145369	#REF!	#REF!	#REF!	23.6667	FALSE			12.4846	37.035	37.069
72	3.95593	320.208	0.0573282	0.148882	0.145098	#REF!	#REF!	#REF!	24	TRUE			14.6187	37.965	37
73	3.95393	320.37	0.0579278	0.145239	0.141318	#REF!	#REF!	#REF!	24.3333	FALSE			14.7716	37.036	36.036
74	3.95193	320.532	0.0654216	0.151188	0.141176	#REF!	#REF!	#REF!	24.6667	FALSE			16.6825	38.553	36
75	3.94993	320.694	0.0662075	0.159165	0.13362	#REF!	#REF!	#REF!	25	TRUE			16.8829	40.587	34.073
76	3.94793	320.857	0.0742188	0.154286	0.133333	#REF!	#REF!	#REF!	25.3333	FALSE			18.9258	39.343	34
77	3.94592	321.02	0.0745098	0.15389	0.140882	#REF!	#REF!	#REF!	25.6667	FALSE			19	39.242	35.925
78	3.94392	321.183	0.078282	0.157106	0.141176	#REF!	#REF!	#REF!	26	TRUE			19.9619	40.062	36
79	3.94192	321.346	0.0784314	0.168184	0.152486	#REF!	#REF!	#REF!	26.3333	FALSE			20	42.887	38.884
80	3.93992	321.509	0.0897369	0.168808	0.152941	#REF!	#REF!	#REF!	26.6667	FALSE			22.8829	43.046	39
81	3.93792	321.672	0.0901961	0.165039	0.149176	#REF!	#REF!	#REF!	27	TRUE			23	42.085	38.04
82	3.93592	321.836	0.0826667	0.176	0.149027	#REF!	#REF!	#REF!	27.3333	FALSE			21.08	44.88	38.002
83	3.93392	321.999	0.0823529	0.183902	0.167843	#REF!	#REF!	#REF!	27.6667	FALSE			21	46.895	42.8
84	3.93192	322.163	0.0861137	0.191639	0.168627	#REF!	#REF!	#REF!	28	TRUE			21.959	48.868	43
85	3.92992	322.327	0.0862745	0.192145	0.185749	#REF!	#REF!	#REF!	28.3333	FALSE			22	48.997	47.366
86	3.92792	322.491	0.0862745	0.199671	0.185914	#REF!	#REF!	#REF!	28.6667	FALSE			22	50.916	47.408
87	3.92592	322.656	0.0862745	0.20751	0.184357	#REF!	#REF!	#REF!	29	TRUE			22	52.915	47.011
88	3.92391	322.82	0.0937808	0.207843	0.184314	#REF!	#REF!	#REF!	29.3333	FALSE			23.9141	53	47
89	3.92191	322.985	0.0941176	0.211596	0.209169	#REF!	#REF!	#REF!	29.6667	FALSE			24	53.957	53.338
90	3.91991	323.15	0.0903682	0.223012	0.209529	#REF!	#REF!	#REF!	30	TRUE			23.0439	56.868	53.43
91	3.91791	323.315	0.0901961	0.233118	0.209153	#REF!	#REF!	#REF!	30.3333	FALSE			23	59.445	53.334
92	3.91591	323.48	0.101433	0.233373	0.208882	#REF!	#REF!	#REF!	30.6667	FALSE			25.8653	59.51	53.265
93	3.91391	323.646	0.101961	0.236208	0.229039	#REF!	#REF!	#REF!	31	TRUE			26	60.233	58.405
94	3.91191	323.811	0.101961	0.247671	0.229533	#REF!	#REF!	#REF!	31.3333	FALSE			26	63.156	58.531
95	3.90991	323.977	0.101961	0.253408	0.239933	#REF!	#REF!	#REF!	31.6667	FALSE			26	64.619	61.183
96	3.90791	324.143	0.105698	0.253557	0.240561	#REF!	#REF!	#REF!	32	TRUE			26.9531	64.657	61.343
97	3.90591	324.309	0.105882	0.262306	0.25522	#REF!	#REF!	#REF!	32.3333	FALSE			27	66.888	65.081
98	3.9039	324.475	0.105882	0.277682	0.255753	#REF!	#REF!	#REF!	32.6667	FALSE			27	70.809	65.217
99	3.9019	324.641	0.105882	0.284345	0.275145	#REF!	#REF!	#REF!	33	TRUE			27	72.508	70.162
100	3.8999	324.808	0.105882	0.289922	0.276235	#REF!	#REF!	#REF!	33.3333	FALSE			27	73.93	70.44
101	3.8979	324.975	0.105882	0.297388	0.306157	#REF!	#REF!	#REF!	33.6667	FALSE			27	75.834	78.07
102	3.8959	325.142	0.117062	0.303584	0.3078	#REF!	#REF!	#REF!	34	TRUE			29.8507	77.414	78.489
103	3.8939	325.309	0.117647	0.311522	0.32682	#REF!	#REF!	#REF!	34.3333	FALSE			30	79.438	83.339
104	3.8919	325.476	0.113925	0.330824	0.32849	#REF!	#REF!	#REF!	34.6667	FALSE			29.0508	84.36	83.765
105	3.8899	325.643	0.113725	0.344192	0.352408	#REF!	#REF!	#REF!	35	TRUE			29	87.769	89.864
106	3.8879	325.811	0.124882	0.350773	0.354718	#REF!	#REF!	#REF!	35.3333	FALSE			31.8448	89.447	90.453
107	3.8859	325.979	0.12549	0.363404	0.365063	#REF!	#REF!	#REF!	35.6667	FALSE			32	92.668	93.091
108	3.88389	326.147	0.13292	0.364337	0.365769	#REF!	#REF!	#REF!	36	TRUE			33.8946	92.906	93.271
109	3.88189	326.315	0.133333	0.360988	0.371012	#REF!	#REF!	#REF!	36.3333	FALSE			34	92.052	94.608
110	3.87989	326.483	0.129622	0.367035	0.371106	#REF!	#REF!	#REF!	36.6667	FALSE			33.0537	93.594	94.632
111	3.87789	326.652	0.129412	0.356506	0.3604	#REF!	#REF!	#REF!	37	TRUE			33	90.909	91.902
112	3.87589	326.82	0.144241	0.340471	0.359224	#REF!	#REF!	#REF!	37.3333	FALSE			36.7814	86.82	91.602
113	3.87389	326.989	0.145098	0.323212	0.322275	#REF!	#REF!	#REF!	37.6667	FALSE			37	82.419	82.18
114	3.87189	327.158	0.141444	0.299204	0.318714	#REF!	#REF!	#REF!	38	TRUE			36.0683	76.297	81.272
115	3.86989	327.327	0.141538	0.274827	0.268329	#REF!	#REF!	#REF!	38.3333	FALSE			36.0922	70.081	68.424
116	3.86789	327.497	0.156435	0.253518	0.2636	#REF!	#REF!	#REF!	38.6667	FALSE			39.891	64.647	67.218
117	3.86589	327.666	0.157517	0.235745	0.225824	#REF!	#REF!	#REF!	39	TRUE			40.1669	60.115	57.585
118	3.86388	327.836	0.163086	0.219871	0.222306	#REF!	#REF!	#REF!	39.3333	FALSE			41.587	56.067	56.688
119	3.86188	328.006	0.163104	0.217259	0.227784	#REF!	#REF!	#REF!	39.6667	FALSE			41.5915	55.401	58.085
120	3.85988	328.176	0.167778	0.216812	0.228012	#REF!	#REF!	#REF!	40	TRUE			42.7833	55.287	58.143
121	3.85788	328.346	0.167364	0.226624	0.244702	#REF!	#REF!	#REF!	40.3333	FALSE			42.6779	57.789	62.399
122	3.85588	328.516	0.154783	0.231051	0.246427	#REF!	#REF!	#REF!	40.6667	FALSE			39.4696	58.918	62.839
123	3.85388	328.687	0.153205	0.235071	0.272863	#REF!	#REF!	#REF!	41	TRUE			39.0673	59.943	69.58
124	3.85188	328.858	0.140338	0.238894	0.27451	#REF!	#REF!	#REF!	41.3333	FALSE			35.7863	60.918	70
125	3.84988	329.028	0.138633	0.242702	0.270827	#REF!	#REF!	#REF!	41.6667	FALSE			35.3514	61.889	69.061
126	3.84788	329.2	0.125341	0.246525	0.270588	#REF!	#REF!	#REF!	42	TRUE			31.962	62.864	69
127	3.84588	329.371	0.123808	0.242992	0.26691	#REF!	#REF!	#REF!	42.3333	FALSE			31.571	61.963	68.062
128	3.84388	329.542	0.1148	0.239431	0.266667	#REF!	#REF!	#REF!	42.6667	FALSE			29.274	61.055	68
129	3.84187	329.714	0.113731	0.24289	0.262992	#REF!	#REF!	#REF!	43	TRUE			29.0015	61.937	67.063
130	3.83987	329.886	0.111107	0.240729	0.262745	#REF!	#REF!	#REF!	43.3333	FALSE			28.3322	61.386	67
131	3.83787	330.058	0.11055	0.237086	0.277427	#REF!	#REF!	#REF!	43.6667	FALSE			28.1903	60.457	70.744
132	3.83587	330.23	0.104556	0.241122	0.278431	#REF!	#REF!	#REF!	44	TRUE			26.6617	61.486	71
133	3.83387	330.402	0.103861	0.241212	0.289431	#REF!	#REF!	#REF!	44.3333	FALSE			26.4846	61.509	73.805
134	3.83187	330.575	0.100347	0.236659	0.290196	#REF!	#REF!	#REF!	44.6667	FALSE			25.5886	60.348	74
135	3.82987	330.748	0.100227	0.232784	0.279208	#REF!	#REF!	#REF!	45	TRUE			25.5578	59.36	71.198
136	3.82787	330.92	0.0990973	0.226467	0.278431	#REF!	#REF!	#REF!	45.3333	FALSE			25.2698	57.749	71
137	3.82587	331.094	0.0986996	0.229878	0.285749	#REF!	#REF!	#REF!	45.6667	FALSE			25.1684	58.619	72.866
138	3.82387	331.267	0.102047	0.235929	0.286275	#REF!	#REF!	#REF!	46	TRUE			26.022	60.162	73
139	3.82186	331.44	0.102001	0.236141	0.267996	#REF!	#REF!	#REF!	46.3333	FALSE			26.0102	60.216	68.339
140	3.81986	331.614	0.101691	0.225898	0.266667	#REF!	#REF!	#REF!	46.6667	FALSE			25.9312	57.604	68
141	3.81786	331.788	0.101381	0.216345	0.25571	#REF!	#REF!	#REF!	47	TRUE			25.8521	55.168	65.206
142	3.81586	331.962	0.0882404	0.217639	0.254902	#REF!	#REF!	#REF!	47.3333	FALSE			22.5013	55.498	65
143	3.81386	332.136	0.0871816	0.224984	0.269494	#REF!	#REF!	#REF!	47.6667	FALSE			22.2313	57.371	68.721
144	3.81186	332.31	0.0922188	0.218247	0.270588	#REF!	#REF!	#REF!	48	TRUE			23.5158	55.653	69
145	3.80986	332.485	0.0922976	0.21051	0.263302	#REF!	#REF!	#REF!	48.3333	FALSE			23.5359	53.68	67.142
146	3.80786	332.659	0.100141	0.211643	0.262745	#REF!	#REF!	#REF!	48.6667	FALSE			25.5359	53.969	67
147	3.80586	332.834	0.100973	0.211765	0.248184	#REF!	#REF!	#REF!	49	TRUE			25.7482	54	63.287
148	3.80386	333.009	0.0880757	0.209541	0.247059	#REF!	#REF!	#REF!	49.3333	FALSE			22.4593	53.433	63
149	3.80185	333.185	0.0868486	0.207945	0.250694	#REF!	#REF!	#REF!	49.6667	FALSE			22.1464	53.026	63.927
150	3.79985	333.36	0.0899361	0.209008	0.25098	#REF!	#REF!	#REF!	50	TRUE			22.9337	53.297	64
151	3.79785	333.536	0.0901961	0.205659	0.243714	#REF!	#REF!	#REF!	50.3333	FALSE			23	52.443	62.147
152	3.79585	333.712	0.0974573	0.200412	0.243137	#REF!	#REF!	#REF!	50.6667	FALSE			24.8516	51.105	62
153	3.79385	333.888	0.0980392	0.202663	0.250396	#REF!	#REF!	#REF!	51	TRUE			25	51.679	63.851
154	3.79185	334.064	0.0980392	0.212098	0.25098	#REF!	#REF!	#REF!	51.3333	FALSE			25	54.085	64
155	3.78985	334.24	0.0980392	0.216749	0.243729	#REF!	#REF!	#REF!	51.6667	FALSE			25	55.271	62.151
156	3.78785	334.417	0.0871702	0.21511	0.243137	#REF!	#REF!	#REF!	52	TRUE			22.2284	54.853	62
157	3.78585	334.593	0.0862745	0.218647	0.257624	#REF!	#REF!	#REF!	52.3333	FALSE			22	55.755	65.694
158	3.78385	334.77	0.0862745	0.228855	0.258824	#REF!	#REF!	#REF!	52.6667	FALSE			22	58.358	66
159	3.78184	334.948	0.0862745	0.237196	0.269675	#REF!	#REF!	#REF!	53	TRUE			22	60.485	68.767
160	3.77984	335.125	0.0935051	0.245322	0.270588	#REF!	#REF!	#REF!	53.3333	FALSE			23.8438	62.557	69
161	3.77784	335.302	0.0941176	0.253188	0.30311	#REF!	#REF!	#REF!	53.6667	FALSE			24	64.563	77.293
162	3.77584	335.48	0.0941176	0.257949	0.305882	#REF!	#REF!	#REF!	54	TRUE			24	65.777	78
163	3.77384	335.658	0.0941176	0.26578	0.320322	#REF!	#REF!	#REF!	54.3333	FALSE			24	67.774	81.682
164	3.77184	335.836	0.0905098	0.263075	0.321624	#REF!	#REF!	#REF!	54.6667	FALSE			23.08	67.084	82.014
165	3.76984	336.014	0.0901961	0.266271	0.332635	#REF!	#REF!	#REF!	55	TRUE			23	67.899	84.822
166	3.76784	336.193	0.0974039	0.277278	0.333733	#REF!	#REF!	#REF!	55.3333	FALSE			24.838	70.706	85.102
167	3.76584	336.371	0.0980392	0.282278	0.358055	#REF!	#REF!	#REF!	55.6667	FALSE			25	71.981	91.304
168	3.76384	336.55	0.101639	0.279145	0.360004	#REF!	#REF!	#REF!	56	TRUE			25.918	71.182	91.801
169	3.76184	336.729	0.101961	0.285224	0.357106	#REF!	#REF!	#REF!	56.3333	FALSE			26	72.732	91.062
170	3.75983	336.908	0.109153	0.28929	0.356863	#REF!	#REF!	#REF!	56.6667	FALSE			27.8341	73.769	91
171	3.75783	337.088	0.109804	0.29138	0.364671	#REF!	#REF!	#REF!	57	TRUE			28	74.302	92.991
172	3.75583	337.267	0.0990267	0.306114	0.365478	#REF!	#REF!	#REF!	57.3333	FALSE			25.2518	78.059	93.197
173	3.75383	337.447	0.0980392	0.30962	0.377141	#REF!	#REF!	#REF!	57.6667	FALSE			25	78.953	96.171
174	3.75183	337.627	0.112393	0.31698	0.3784	#REF!	#REF!	#REF!	58	TRUE			28.6603	80.83	96.492
175	3.74983	337.807	0.113725	0.321525	0.392553	#REF!	#REF!	#REF!	58.3333	FALSE			29	81.989	100.101
176	3.74783	337.988	0.106556	0.3248	0.394718	#REF!	#REF!	#REF!	58.6667	FALSE			27.1718	82.824	100.653
177	3.74583	338.168	0.105882	0.331345	0.42569	#REF!	#REF!	#REF!	59	TRUE			27	84.493	108.551
178	3.74383	338.349	0.109463	0.333337	0.428918	#REF!	#REF!	#REF!	59.3333	FALSE			27.9131	85.001	109.374
179	3.74183	338.53	0.109804	0.337322	0.441357	#REF!	#REF!	#REF!	59.6667	FALSE			28	86.017	112.546
180	3.73982	338.711	0.109804	0.345102	0.442988	#REF!	#REF!	#REF!	60	TRUE			28	88.001	112.962
181	3.73782	338.892	0.109804	0.349655	0.472067	#REF!	#REF!	#REF!	60.3333	FALSE			28	89.162	120.377
182	3.73582	339.074	0.106231	0.35029	0.475318	#REF!	#REF!	#REF!	60.6667	FALSE			27.0888	89.324	121.206
183	3.73382	339.256	0.105882	0.352482	0.480843	#REF!	#REF!	#REF!	61	TRUE			27	89.883	122.615
184	3.73182	339.437	0.116591	0.356431	0.480667	#REF!	#REF!	#REF!	61.3333	FALSE			29.7306	90.89	122.57
185	3.72982	339.62	0.117647	0.353204	0.481933	#REF!	#REF!	#REF!	61.6667	FALSE			30	90.067	122.893
186	3.72782	339.802	0.110516	0.350718	0.481745	#REF!	#REF!	#REF!	62	TRUE			28.1816	89.433	122.845
187	3.72582	339.984	0.109804	0.344667	0.462643	#REF!	#REF!	#REF!	62.3333	FALSE			28	87.89	117.974
188	3.72382	340.167	0.120489	0.333039	0.459996	#REF!	#REF!	#REF!	62.6667	FALSE			30.7247	84.925	117.299
189	3.72182	340.35	0.121569	0.324455	0.441804	#REF!	#REF!	#REF!	63	TRUE			31	82.736	112.66
190	3.71981	340.533	0.121592	0.312678	0.438498	#REF!	#REF!	#REF!	63.3333	FALSE			31.006	79.733	111.817
191	3.71781	340.716	0.121701	0.308792	0.411953	#REF!	#REF!	#REF!	63.6667	FALSE			31.0337	78.742	105.048
192	3.71581	340.9	0.11825	0.302361	0.408424	#REF!	#REF!	#REF!	64	TRUE			30.1537	77.102	104.148
193	3.71381	341.083	0.117986	0.300424	0.401851	#REF!	#REF!	#REF!	64.3333	FALSE			30.0864	76.608	102.472
194	3.71181	341.267	0.117289	0.297518	0.400502	#REF!	#REF!	#REF!	64.6667	FALSE			29.9086	75.867	102.128
195	3.70981	341.451	0.117102	0.296102	0.3864	#REF!	#REF!	#REF!	65	TRUE			29.8609	75.506	98.532
196	3.70781	341.636	0.115212	0.288729	0.384137	#REF!	#REF!	#REF!	65.3333	FALSE			29.3791	73.626	97.955
197	3.70581	341.82	0.11523	0.277835	0.369224	#REF!	#REF!	#REF!	65.6667	FALSE			29.3836	70.848	94.152
198	3.70381	342.005	0.118206	0.269404	0.367349	#REF!	#REF!	#REF!	66	TRUE			30.1426	68.698	93.674
199	3.70181	342.19	0.118606	0.270373	0.371016	#REF!	#REF!	#REF!	66.3333	FALSE			30.2445	68.945	94.609
200	3.6998	342.375	0.111632	0.274125	0.370973	#REF!	#REF!	#REF!	66.6667	FALSE			28.4661	69.902	94.598
201	3.6978	342.56	0.110969	0.271984	0.370157	#REF!	#REF!	#REF!	67	TRUE			28.2972	69.356	94.39
202	3.6958	342.745	0.118246	0.27142	0.369737	#REF!	#REF!	#REF!	67.3333	FALSE			30.1528	69.212	94.283
203	3.6938	342.931	0.118824	0.270969	0.365824	#REF!	#REF!	#REF!	67.6667	FALSE			30.3001	69.097	93.285
204	3.6918	343.117	0.110682	0.27429	0.365051	#REF!	#REF!	#REF!	68	TRUE			28.2238	69.944	93.088
205	3.6898	343.303	0.109804	0.27449	0.364706	#REF!	#REF!	#REF!	68.3333	FALSE			28	69.995	93
206	3.6878	343.489	0.110305	0.274392	0.364706	#REF!	#REF!	#REF!	68.6667	FALSE			28.1277	69.97	93
207	3.6858	343.676	0.110154	0.277835	0.354129	#REF!	#REF!	#REF!	69	TRUE			28.0893	70.848	90.303
208	3.6838	343.862	0.106424	0.274878	0.352941	#REF!	#REF!	#REF!	69.3333	FALSE			27.1381	70.094	90
209	3.6818	344.049	0.105819	0.264298	0.352941	#REF!	#REF!	#REF!	69.6667	FALSE			26.9839	67.396	90
210	3.6798	344.236	0.102093	0.263231	0.352941	#REF!	#REF!	#REF!	70	TRUE			26.0337	67.124	90
211	3.67779	344.424	0.101484	0.266847	0.349424	#REF!	#REF!	#REF!	70.3333	FALSE			25.8785	68.046	89.103
212	3.67579	344.611	0.108922	0.267957	0.34902	#REF!	#REF!	#REF!	70.6667	FALSE			27.775	68.329	89
213	3.67379	344.799	0.109804	0.271035	0.359561	#REF!	#REF!	#REF!	71	TRUE			28	69.114	91.688
214	3.67179	344.987	0.10531	0.276145	0.360784	#REF!	#REF!	#REF!	71.3333	FALSE			26.854	70.417	92
215	3.66979	345.175	0.104579	0.276498	0.350255	#REF!	#REF!	#REF!	71.6667	FALSE			26.6676	70.507	89.315
216	3.66779	345.363	0.110582	0.280765	0.34902	#REF!	#REF!	#REF!	72	TRUE			28.1985	71.595	89
217	3.66579	345.552	0.111521	0.284702	0.356031	#REF!	#REF!	#REF!	72.3333	FALSE			28.4378	72.599	90.788
218	3.66379	345.74	0.109116	0.278012	0.356863	#REF!	#REF!	#REF!	72.6667	FALSE			27.8245	70.893	91
219	3.66179	345.929	0.108908	0.280584	0.363867	#REF!	#REF!	#REF!	73	TRUE			27.7716	71.549	92.786
220	3.65979	346.119	0.112512	0.283118	0.364706	#REF!	#REF!	#REF!	73.3333	FALSE			28.6906	72.195	93
221	3.65778	346.308	0.113036	0.279694	0.364706	#REF!	#REF!	#REF!	73.6667	FALSE			28.8243	71.322	93
222	3.65578	346.497	0.104216	0.279961	0.364706	#REF!	#REF!	#REF!	74	TRUE			26.5752	71.39	93
223	3.65378	346.687	0.102925	0.275125	0.38218	#REF!	#REF!	#REF!	74.3333	FALSE			26.246	70.157	97.456
224	3.65178	346.877	0.108692	0.272882	0.384314	#REF!	#REF!	#REF!	74.6667	FALSE			27.7164	69.585	98
225	3.64978	347.067	0.109528	0.272588	0.370349	#REF!	#REF!	#REF!	75	TRUE			27.9297	69.51	94.439
226	3.64778	347.258	0.103113	0.2708	0.368627	#REF!	#REF!	#REF!	75.3333	FALSE			26.2939	69.054	94
227	3.64578	347.448	0.102098	0.26898	0.372114	#REF!	#REF!	#REF!	75.6667	FALSE			26.0351	68.59	94.889
228	3.64378	347.639	0.105446	0.266914	0.372549	#REF!	#REF!	#REF!	76	TRUE			26.8887	68.063	95
229	3.64178	347.83	0.105882	0.266667	0.362098	#REF!	#REF!	#REF!	76.3333	FALSE			27	68	92.335
230	3.63978	348.021	0.102401	0.268016	0.360784	#REF!	#REF!	#REF!	76.6667	FALSE			26.1122	68.344	92
231	3.63777	348.213	0.101961	0.26809	0.367745	#REF!	#REF!	#REF!	77	TRUE			26	68.363	93.775
232	3.63577	348.404	0.108916	0.266816	0.368627	#REF!	#REF!	#REF!	77.3333	FALSE			27.7735	68.038	94
233	3.63377	348.596	0.109804	0.262098	0.347773	#REF!	#REF!	#REF!	77.6667	FALSE			28	66.835	88.682
234	3.63177	348.788	0.102856	0.257682	0.345098	#REF!	#REF!	#REF!	78	TRUE			26.2284	65.709	88
235	3.62977	348.981	0.101961	0.263929	0.352043	#REF!	#REF!	#REF!	78.3333	FALSE			26	67.302	89.771
236	3.62777	349.173	0.105431	0.271698	0.352941	#REF!	#REF!	#REF!	78.6667	FALSE			26.8848	69.283	90
237	3.62577	349.366	0.105882	0.262408	0.363345	#REF!	#REF!	#REF!	79	TRUE			27	66.914	92.653
238	3.62377	349.559	0.102416	0.258439	0.364706	#REF!	#REF!	#REF!	79.3333	FALSE			26.1162	65.902	93
239	3.62177	349.752	0.101961	0.261627	0.350851	#REF!	#REF!	#REF!	79.6667	FALSE			26	66.715	89.467
240	3.61977	349.945	0.101961	0.259216	0.34902	#REF!	#REF!	#REF!	80	TRUE			26	66.1	89
241	3.61776	350.139	0.101961	0.255365	0.342098	#REF!	#REF!	#REF!	80.3333	FALSE			26	65.118	87.235
242	3.61576	350.332	0.0950439	0.251443	0.341176	#REF!	#REF!	#REF!	80.6667	FALSE			24.2362	64.118	87
243	3.61376	350.526	0.0941176	0.25098	0.341176	#REF!	#REF!	#REF!	81	TRUE			24	64	87
244	3.61176	350.721	0.101027	0.25098	0.341176	#REF!	#REF!	#REF!	81.3333	FALSE			25.7618	64	87
245	3.60976	350.915	0.101961	0.247529	0.323914	#REF!	#REF!	#REF!	81.6667	FALSE			26	63.12	82.598
246	3.60776	351.11	0.0950592	0.250498	0.321592	#REF!	#REF!	#REF!	82	TRUE			24.2401	63.877	82.006
247	3.60576	351.305	0.0941176	0.247518	0.318427	#REF!	#REF!	#REF!	82.3333	FALSE			24	63.117	81.199
248	3.60376	351.5	0.0975647	0.243612	0.318255	#REF!	#REF!	#REF!	82.6667	FALSE			24.879	62.121	81.155
249	3.60176	351.695	0.0980392	0.242875	0.333933	#REF!	#REF!	#REF!	83	TRUE			25	61.933	85.153
250	3.59976	351.89	0.0980392	0.242741	0.335678	#REF!	#REF!	#REF!	83.3333	FALSE			25	61.899	85.598
251	3.59776	352.086	0.0980392	0.239635	0.331855	#REF!	#REF!	#REF!	83.6667	FALSE			25	61.107	84.623
252	3.59575	352.282	0.0911608	0.23629	0.330992	#REF!	#REF!	#REF!	84	TRUE			23.246	60.254	84.403
253	3.59375	352.478	0.0901961	0.235976	0.327769	#REF!	#REF!	#REF!	84.3333	FALSE			23	60.174	83.581
254	3.59175	352.675	0.0970671	0.239506	0.327082	#REF!	#REF!	#REF!	84.6667	FALSE			24.7521	61.074	83.406
255	3.58975	352.871	0.0980392	0.240851	0.327557	#REF!	#REF!	#REF!	85	TRUE			25	61.417	83.527
256	3.58775	353.068	0.104902	0.235137	0.327475	#REF!	#REF!	#REF!	85.3333	FALSE			26.7501	59.96	83.506
257	3.58575	353.265	0.105882	0.237702	0.337573	#REF!	#REF!	#REF!	85.6667	FALSE			27	60.614	86.081
258	3.58375	353.462	0.0955988	0.234627	0.338855	#REF!	#REF!	#REF!	86	TRUE			24.3777	59.83	86.408
259	3.58175	353.66	0.0941176	0.234039	0.340996	#REF!	#REF!	#REF!	86.3333	FALSE			24	59.68	86.954
260	3.57975	353.857	0.0975416	0.240792	0.341043	#REF!	#REF!	#REF!	86.6667	FALSE			24.8731	61.402	86.966
261	3.57775	354.055	0.0980392	0.24169	0.328698	#REF!	#REF!	#REF!	87	TRUE			25	61.631	83.818
262	3.57574	354.253	0.101459	0.238176	0.327031	#REF!	#REF!	#REF!	87.3333	FALSE			25.8721	60.735	83.393
263	3.57374	354.452	0.101961	0.244416	0.339937	#REF!	#REF!	#REF!	87.6667	FALSE			26	62.326	86.684
264	3.57174	354.65	0.0985443	0.245325	0.341631	#REF!	#REF!	#REF!	88	TRUE			25.1288	62.558	87.116
265	3.56974	354.849	0.0980392	0.245227	0.341439	#REF!	#REF!	#REF!	88.3333	FALSE			25	62.533	87.067
266	3.56774	355.048	0.0946216	0.243396	0.341247	#REF!	#REF!	#REF!	88.6667	FALSE			24.1285	62.066	87.018
267	3.56574	355.247	0.0941176	0.244894	0.339298	#REF!	#REF!	#REF!	89	TRUE			24	62.448	86.521
268	3.56374	355.447	0.0943322	0.247094	0.338749	#REF!	#REF!	#REF!	89.3333	FALSE			24.0547	63.009	86.381
269	3.56174	355.647	0.0944678	0.249047	0.345275	#REF!	#REF!	#REF!	89.6667	FALSE			24.0893	63.507	88.045
270	3.55974	355.846	0.0945714	0.252773	0.346016	#REF!	#REF!	#REF!	90	TRUE			24.1157	64.457	88.234
271	3.55774	356.047	0.0946745	0.24998	0.348584	#REF!	#REF!	#REF!	90.3333	FALSE			24.142	63.745	88.889
272	3.55573	356.247	0.0958882	0.246157	0.34902	#REF!	#REF!	#REF!	90.6667	FALSE			24.4515	62.77	89
273	3.55373	356.448	0.0957482	0.24578	0.376212	#REF!	#REF!	#REF!	91	TRUE			24.4158	62.674	95.934
274	3.55173	356.648	0.0957965	0.255788	0.380392	#REF!	#REF!	#REF!	91.3333	FALSE			24.4281	65.226	97
275	3.54973	356.849	0.0960584	0.256188	0.370208	#REF!	#REF!	#REF!	91.6667	FALSE			24.4949	65.328	94.403
276	3.54773	357.051	0.0978004	0.259333	0.368627	#REF!	#REF!	#REF!	92	TRUE			24.9391	66.13	94
277	3.54573	357.252	0.0980392	0.264918	0.384769	#REF!	#REF!	#REF!	92.3333	FALSE			25	67.554	98.116
278	3.54373	357.454	0.0957565	0.262427	0.387388	#REF!	#REF!	#REF!	92.6667	FALSE			24.4179	66.919	98.784
279	3.54173	357.656	0.0955016	0.263294	0.385396	#REF!	#REF!	#REF!	93	TRUE			24.3529	67.14	98.276
280	3.53973	357.858	0.0956047	0.266788	0.384969	#REF!	#REF!	#REF!	93.3333	FALSE			24.3792	68.031	98.167
281	3.53773	358.06	0.0957082	0.271094	0.390192	#REF!	#REF!	#REF!	93.6667	FALSE			24.4056	69.129	99.499
282	3.53572	358.263	0.0962718	0.281663	0.391227	#REF!	#REF!	#REF!	94	TRUE			24.5493	71.824	99.763
283	3.53372	358.466	0.096242	0.282455	0.402196	#REF!	#REF!	#REF!	94.3333	FALSE			24.5417	72.026	102.56
284	3.53172	358.669	0.099309	0.282118	0.403922	#REF!	#REF!	#REF!	94.6667	FALSE			25.3238	71.94	103
285	3.52972	358.872	0.100129	0.282329	0.420494	#REF!	#REF!	#REF!	95	TRUE			25.5329	71.994	107.226
286	3.52772	359.076	0.0968129	0.285655	0.423365	#REF!	#REF!	#REF!	95.3333	FALSE			24.6873	72.842	107.958
287	3.52572	359.28	0.0963282	0.286275	0.416784	#REF!	#REF!	#REF!	95.6667	FALSE			24.5637	73	106.28
288	3.52372	359.484	0.103172	0.289737	0.415686	#REF!	#REF!	#REF!	96	TRUE			26.3089	73.883	106
289	3.52172	359.688	0.104378	0.297137	0.425792	#REF!	#REF!	#REF!	96.3333	FALSE			26.6164	75.77	108.577
290	3.51972	359.892	0.0999122	0.298341	0.427451	#REF!	#REF!	#REF!	96.6667	FALSE			25.4776	76.077	109
291	3.51772	360.097	0.0993655	0.298435	0.444275	#REF!	#REF!	#REF!	97	TRUE			25.3382	76.101	113.29
292	3.51571	360.302	0.0969431	0.292227	0.447059	#REF!	#REF!	#REF!	97.3333	FALSE			24.7205	74.518	114
293	3.51371	360.507	0.0962996	0.287506	0.443698	#REF!	#REF!	#REF!	97.6667	FALSE			24.5564	73.314	113.143
294	3.51171	360.713	0.0960929	0.287541	0.443137	#REF!	#REF!	#REF!	98	TRUE			24.5037	73.323	113
295	3.50971	360.918	0.0958863	0.287831	0.453208	#REF!	#REF!	#REF!	98.3333	FALSE			24.451	73.397	115.568
296	3.50771	361.124	0.101053	0.293239	0.454902	#REF!	#REF!	#REF!	98.6667	FALSE			25.7686	74.776	116
297	3.50571	361.33	0.101961	0.294118	0.458255	#REF!	#REF!	#REF!	99	TRUE			26	75	116.855
298	3.50371	361.537	0.0991004	0.292588	0.458824	#REF!	#REF!	#REF!	99.3333	FALSE			25.2706	74.61	117
299	3.50171	361.743	0.0985102	0.295871	0.452125	#REF!	#REF!	#REF!	99.6667	FALSE			25.1201	75.447	115.292
300	3.49971	361.95	0.0984067	0.291137	0.45098	#REF!	#REF!	#REF!	100	TRUE			25.0937	74.24	115
301	3.49771	362.157	0.0983035	0.281314	0.454325	#REF!	#REF!	#REF!	100.333	FALSE			25.0674	71.735	115.853
302	3.49571	362.365	0.101407	0.283224	0.454902	#REF!	#REF!	#REF!	100.667	FALSE			25.8587	72.222	116
303	3.4937	362.572	0.101961	0.289263	0.451561	#REF!	#REF!	#REF!	101	TRUE			26	73.762	115.148
304	3.4917	362.78	0.0986212	0.291592	0.45098	#REF!	#REF!	#REF!	101.333	FALSE			25.1484	74.356	115
305	3.4897	362.988	0.0980392	0.295271	0.447643	#REF!	#REF!	#REF!	101.667	FALSE			25	75.294	114.149
306	3.4877	363.196	0.0947031	0.292831	0.447059	#REF!	#REF!	#REF!	102	TRUE			24.1493	74.672	114
307	3.4857	363.405	0.0941176	0.288855	0.450392	#REF!	#REF!	#REF!	102.333	FALSE			24	73.658	114.85
308	3.4837	363.613	0.0974498	0.286561	0.45098	#REF!	#REF!	#REF!	102.667	FALSE			24.8497	73.073	115
309	3.4817	363.822	0.0980392	0.282945	0.460973	#REF!	#REF!	#REF!	103	TRUE			25	72.151	117.548
310	3.4797	364.032	0.101367	0.28611	0.462745	#REF!	#REF!	#REF!	103.333	FALSE			25.8487	72.958	118
311	3.4777	364.241	0.101961	0.290298	0.469396	#REF!	#REF!	#REF!	103.667	FALSE			26	74.026	119.696
312	3.4757	364.451	0.101961	0.287008	0.470588	#REF!	#REF!	#REF!	104	TRUE			26	73.187	120
313	3.47369	364.661	0.101961	0.289596	0.457298	#REF!	#REF!	#REF!	104.333	FALSE			26	73.847	116.611
314	3.47169	364.871	0.09864	0.291275	0.454902	#REF!	#REF!	#REF!	104.667	FALSE			25.1532	74.275	116
315	3.46969	365.081	0.0980392	0.282745	0.448263	#REF!	#REF!	#REF!	105	TRUE			25	72.1	114.307
316	3.46769	365.292	0.101356	0.275545	0.447059	#REF!	#REF!	#REF!	105.333	FALSE			25.8458	70.264	114
317	3.46569	365.503	0.101961	0.271196	0.45369	#REF!	#REF!	#REF!	105.667	FALSE			26	69.155	115.691
318	3.46369	365.714	0.101961	0.270588	0.454902	#REF!	#REF!	#REF!	106	TRUE			26	69	116
319	3.46169	365.925	0.101961	0.273898	0.471459	#REF!	#REF!	#REF!	106.333	FALSE			26	69.844	120.222
320	3.45969	366.137	0.10527	0.275141	0.47451	#REF!	#REF!	#REF!	106.667	FALSE			26.8438	70.161	121
321	3.45769	366.349	0.105882	0.275165	0.461282	#REF!	#REF!	#REF!	107	TRUE			27	70.167	117.627
322	3.45569	366.561	0.0992718	0.278373	0.458824	#REF!	#REF!	#REF!	107.333	FALSE			25.3143	70.985	117
323	3.45368	366.773	0.0980392	0.278894	0.455522	#REF!	#REF!	#REF!	107.667	FALSE			25	71.118	116.158
324	3.45168	366.986	0.107944	0.2788	0.454902	#REF!	#REF!	#REF!	108	TRUE			27.5256	71.094	116
325	3.44968	367.199	0.109804	0.275404	0.4648	#REF!	#REF!	#REF!	108.333	FALSE			28	70.228	118.524
326	3.44768	367.412	0.106506	0.280835	0.466667	#REF!	#REF!	#REF!	108.667	FALSE			27.1591	71.613	119
327	3.44568	367.625	0.105882	0.282192	0.466667	#REF!	#REF!	#REF!	109	TRUE			27	71.959	119
328	3.44368	367.839	0.102589	0.279047	0.466651	#REF!	#REF!	#REF!	109.333	FALSE			26.1601	71.157	118.996
329	3.44168	368.053	0.101961	0.278412	0.486122	#REF!	#REF!	#REF!	109.667	FALSE			26	70.995	123.961
330	3.43968	368.267	0.101961	0.281722	0.489576	#REF!	#REF!	#REF!	110	TRUE			26	71.839	124.842
331	3.43768	368.481	0.101961	0.285133	0.480439	#REF!	#REF!	#REF!	110.333	FALSE			26	72.709	122.512
332	3.43568	368.696	0.105247	0.288765	0.478831	#REF!	#REF!	#REF!	110.667	FALSE			26.838	73.635	122.102
333	3.43367	368.911	0.105882	0.289208	0.484255	#REF!	#REF!	#REF!	111	TRUE			27	73.748	123.485
334	3.43167	369.126	0.105882	0.279169	0.485094	#REF!	#REF!	#REF!	111.333	FALSE			27	71.188	123.699
335	3.42967	369.341	0.105882	0.277635	0.488184	#REF!	#REF!	#REF!	111.667	FALSE			27	70.797	124.487
336	3.42767	369.557	0.0993255	0.280929	0.488635	#REF!	#REF!	#REF!	112	TRUE			25.328	71.637	124.602
337	3.42567	369.773	0.0980392	0.281475	0.479	#REF!	#REF!	#REF!	112.333	FALSE			25	71.776	122.145
338	3.42367	369.989	0.101314	0.288741	0.477427	#REF!	#REF!	#REF!	112.667	FALSE			25.835	73.629	121.744
339	3.42167	370.205	0.101961	0.286922	0.493184	#REF!	#REF!	#REF!	113	TRUE			26	73.165	125.762
340	3.41967	370.422	0.105232	0.276463	0.496443	#REF!	#REF!	#REF!	113.333	FALSE			26.8341	70.498	126.593
341	3.41767	370.639	0.105882	0.278827	0.511929	#REF!	#REF!	#REF!	113.667	FALSE			27	71.101	130.542
342	3.41567	370.856	0.105874	0.285192	0.515082	#REF!	#REF!	#REF!	114	TRUE			26.9978	72.724	131.346
343	3.41367	371.073	0.105882	0.279745	0.510702	#REF!	#REF!	#REF!	114.333	FALSE			27	71.335	130.229
344	3.41166	371.291	0.102834	0.275169	0.509804	#REF!	#REF!	#REF!	114.667	FALSE			26.2227	70.168	130
345	3.40966	371.509	0.102322	0.279137	0.509498	#REF!	#REF!	#REF!	115	TRUE			26.0922	71.18	129.922
346	3.40766	371.727	0.102813	0.283427	0.508957	#REF!	#REF!	#REF!	115.333	FALSE			26.2172	72.274	129.784
347	3.40566	371.945	0.103098	0.285922	0.511525	#REF!	#REF!	#REF!	115.667	FALSE			26.2899	72.91	130.439
348	3.40366	372.164	0.102189	0.289529	0.511859	#REF!	#REF!	#REF!	116	TRUE			26.0582	73.83	130.524
349	3.40166	372.383	0.101961	0.286941	0.519761	#REF!	#REF!	#REF!	116.333	FALSE			26	73.17	132.539
350	3.39966	372.602	0.109531	0.283024	0.521251	#REF!	#REF!	#REF!	116.667	FALSE			27.9303	72.171	132.919
351	3.39766	372.821	0.11078	0.287439	0.51922	#REF!	#REF!	#REF!	117	TRUE			28.2489	73.297	132.401
352	3.39566	373.041	0.107569	0.291835	0.518553	#REF!	#REF!	#REF!	117.333	FALSE			27.4302	74.418	132.231
353	3.39366	373.261	0.107071	0.297102	0.52971	#REF!	#REF!	#REF!	117.667	FALSE			27.3031	75.761	135.076
354	3.39165	373.481	0.109349	0.299212	0.532667	#REF!	#REF!	#REF!	118	TRUE			27.8841	76.299	135.83
355	3.38965	373.702	0.109804	0.295027	0.530114	#REF!	#REF!	#REF!	118.333	FALSE			28	75.232	135.179
356	3.38765	373.923	0.111806	0.290878	0.529173	#REF!	#REF!	#REF!	118.667	FALSE			28.5105	74.174	134.939
357	3.38565	374.144	0.112124	0.290196	0.539906	#REF!	#REF!	#REF!	119	TRUE			28.5915	74	137.676
358	3.38365	374.365	0.115678	0.296671	0.542808	#REF!	#REF!	#REF!	119.333	FALSE			29.498	75.651	138.416
359	3.38165	374.586	0.116143	0.302957	0.5514	#REF!	#REF!	#REF!	119.667	FALSE			29.6164	77.254	140.607
360	3.37965	374.808	0.110863	0.300267	0.553486	#REF!	#REF!	#REF!	120	TRUE			28.2701	76.568	141.139
361	3.37765	375.03	0.109804	0.298333	0.574486	#REF!	#REF!	#REF!	120.333	FALSE			28	76.075	146.494
362	3.37565	375.252	0.114517	0.298039	0.579086	#REF!	#REF!	#REF!	120.667	FALSE			29.2018	76	147.667
363	3.37365	375.475	0.115425	0.29758	0.570973	#REF!	#REF!	#REF!	121	TRUE			29.4334	75.883	145.598
364	3.37164	375.698	0.118547	0.304027	0.56909	#REF!	#REF!	#REF!	121.333	FALSE			30.2294	77.527	145.118
365	3.36964	375.921	0.11914	0.305816	0.583686	#REF!	#REF!	#REF!	121.667	FALSE			30.3807	77.983	148.84
366	3.36764	376.144	0.116957	0.312325	0.586204	#REF!	#REF!	#REF!	122	TRUE			29.824	79.643	149.482
367	3.36564	376.368	0.116298	0.316945	0.600914	#REF!	#REF!	#REF!	122.333	FALSE			29.6559	80.821	153.233
368	3.36364	376.592	0.116091	0.311212	0.604078	#REF!	#REF!	#REF!	122.667	FALSE			29.6032	79.359	154.04
369	3.36164	376.816	0.115884	0.313004	0.623212	#REF!	#REF!	#REF!	123	TRUE			29.5505	79.816	158.919
370	3.35964	377.04	0.118091	0.316733	0.627451	#REF!	#REF!	#REF!	123.333	FALSE			30.1133	80.767	160
371	3.35764	377.265	0.11852	0.310808	0.611392	#REF!	#REF!	#REF!	123.667	FALSE			30.2225	79.256	155.905
372	3.35564	377.49	0.120996	0.312157	0.607843	#REF!	#REF!	#REF!	124	TRUE			30.8541	79.6	155
373	3.35364	377.715	0.121569	0.318941	0.614259	#REF!	#REF!	#REF!	124.333	FALSE			31	81.33	156.636
374	3.35163	377.941	0.121569	0.31529	0.615686	#REF!	#REF!	#REF!	124.667	FALSE			31	80.399	157
375	3.34963	378.167	0.121569	0.317522	0.612482	#REF!	#REF!	#REF!	125	TRUE			31	80.968	156.183
376	3.34763	378.393	0.115746	0.317773	0.611765	#REF!	#REF!	#REF!	125.333	FALSE			29.5152	81.032	156
377	3.34563	378.619	0.114231	0.317647	0.627765	#REF!	#REF!	#REF!	125.667	FALSE			29.1288	81	160.08
378	3.34363	378.845	0.123375	0.323325	0.631373	#REF!	#REF!	#REF!	126	TRUE			31.4606	82.448	161
379	3.34163	379.072	0.12549	0.324518	0.631373	#REF!	#REF!	#REF!	126.333	FALSE			32	82.752	161
380	3.33963	379.299	0.119102	0.323549	0.631373	#REF!	#REF!	#REF!	126.667	FALSE			30.3709	82.505	161
381	3.33763	379.527	0.117647	0.32411	0.653718	#REF!	#REF!	#REF!	127	TRUE			30	82.648	166.698
382	3.33563	379.755	0.114456	0.324227	0.658824	#REF!	#REF!	#REF!	127.333	FALSE			29.1864	82.678	168
383	3.33363	379.982	0.113725	0.318859	0.649259	#REF!	#REF!	#REF!	127.667	FALSE			29	81.309	165.561
384	3.33163	380.211	0.120099	0.317647	0.647059	#REF!	#REF!	#REF!	128	TRUE			30.6252	81	165
385	3.32962	380.439	0.121569	0.320831	0.64069	#REF!	#REF!	#REF!	128.333	FALSE			31	81.812	163.376
386	3.32762	380.668	0.124751	0.317051	0.639216	#REF!	#REF!	#REF!	128.667	FALSE			31.8116	80.848	163
387	3.32562	380.897	0.12549	0.312725	0.648757	#REF!	#REF!	#REF!	129	TRUE			32	79.745	165.433
388	3.32362	381.126	0.122311	0.311686	0.65098	#REF!	#REF!	#REF!	129.333	FALSE			31.1894	79.48	166
389	3.32162	381.356	0.121569	0.314914	0.644627	#REF!	#REF!	#REF!	129.667	FALSE			31	80.303	164.38
390	3.31962	381.586	0.121569	0.317286	0.643137	#REF!	#REF!	#REF!	130	TRUE			31	80.908	164
391	3.31762	381.816	0.121569	0.316192	0.643137	#REF!	#REF!	#REF!	130.333	FALSE			31	80.629	164
392	3.31562	382.046	0.121569	0.314149	0.643137	#REF!	#REF!	#REF!	130.667	FALSE			31	80.108	164
393	3.31362	382.277	0.121569	0.313725	0.649475	#REF!	#REF!	#REF!	131	TRUE			31	80	165.616
394	3.31162	382.508	0.124736	0.313725	0.65098	#REF!	#REF!	#REF!	131.333	FALSE			31.8077	80	166
395	3.30961	382.739	0.12549	0.313725	0.644651	#REF!	#REF!	#REF!	131.667	FALSE			32	80	164.386
396	3.30761	382.971	0.115999	0.311596	0.643137	#REF!	#REF!	#REF!	132	TRUE			29.5798	79.457	164
397	3.30561	383.203	0.113725	0.308114	0.646298	#REF!	#REF!	#REF!	132.333	FALSE			29	78.569	164.806
398	3.30361	383.435	0.120045	0.308455	0.647059	#REF!	#REF!	#REF!	132.667	FALSE			30.6115	78.656	165
399	3.30161	383.667	0.121569	0.311929	0.656533	#REF!	#REF!	#REF!	133	TRUE			31	79.542	167.416
400	3.29961	383.9	0.124725	0.309631	0.658824	#REF!	#REF!	#REF!	133.333	FALSE			31.8048	78.956	168
401	3.29761	384.133	0.12549	0.302655	0.655671	#REF!	#REF!	#REF!	133.667	FALSE			32	77.177	167.196
402	3.29561	384.366	0.119186	0.301216	0.654902	#REF!	#REF!	#REF!	134	TRUE			30.3924	76.81	167
403	3.29361	384.6	0.117647	0.308133	0.645451	#REF!	#REF!	#REF!	134.333	FALSE			30	78.574	164.59
404	3.29161	384.833	0.120795	0.312506	0.643137	#REF!	#REF!	#REF!	134.667	FALSE			30.8028	79.689	164
405	3.2896	385.067	0.121569	0.306973	0.646282	#REF!	#REF!	#REF!	135	TRUE			31	78.278	164.802
406	3.2876	385.302	0.11528	0.305812	0.647059	#REF!	#REF!	#REF!	135.333	FALSE			29.3963	77.982	165
407	3.2856	385.536	0.113725	0.312169	0.659627	#REF!	#REF!	#REF!	135.667	FALSE			29	79.603	168.205
408	3.2836	385.771	0.116866	0.313451	0.662745	#REF!	#REF!	#REF!	136	TRUE			29.8009	79.93	169
409	3.2816	386.007	0.117647	0.307357	0.665882	#REF!	#REF!	#REF!	136.333	FALSE			30	78.376	169.8
410	3.2796	386.242	0.117647	0.302725	0.666686	#REF!	#REF!	#REF!	136.667	FALSE			30	77.195	170.005
411	3.2776	386.478	0.117647	0.305075	0.675725	#REF!	#REF!	#REF!	137	TRUE			30	77.794	172.31
412	3.2756	386.714	0.117647	0.309016	0.677588	#REF!	#REF!	#REF!	137.333	FALSE			30	78.799	172.785
413	3.2736	386.95	0.117647	0.309561	0.669525	#REF!	#REF!	#REF!	137.667	FALSE			30	78.938	170.729
414	3.2716	387.187	0.130164	0.303463	0.667871	#REF!	#REF!	#REF!	138	TRUE			33.1918	77.383	170.307
415	3.26959	387.424	0.133333	0.301565	0.678686	#REF!	#REF!	#REF!	138.333	FALSE			34	76.899	173.065
416	3.26759	387.661	0.123957	0.298714	0.681165	#REF!	#REF!	#REF!	138.667	FALSE			31.6091	76.172	173.697
417	3.26559	387.899	0.121569	0.29749	0.679878	#REF!	#REF!	#REF!	139	TRUE			31	75.86	173.369
418	3.26359	388.137	0.121606	0.297878	0.679216	#REF!	#REF!	#REF!	139.333	FALSE			31.0095	75.959	173.2
419	3.26159	388.375	0.121735	0.298741	0.660878	#REF!	#REF!	#REF!	139.667	FALSE			31.0425	76.179	168.524
420	3.25959	388.613	0.121838	0.299016	0.656835	#REF!	#REF!	#REF!	140	TRUE			31.0688	76.249	167.493
421	3.25759	388.852	0.121942	0.295996	0.663914	#REF!	#REF!	#REF!	140.333	FALSE			31.0952	75.479	169.298
422	3.25559	389.091	0.124402	0.295286	0.665498	#REF!	#REF!	#REF!	140.667	FALSE			31.7226	75.298	169.702
423	3.25359	389.33	0.12491	0.298596	0.661184	#REF!	#REF!	#REF!	141	TRUE			31.8521	76.142	168.602
424	3.25159	389.57	0.127917	0.302353	0.660184	#REF!	#REF!	#REF!	141.333	FALSE			32.6188	77.1	168.347
425	3.24959	389.81	0.128625	0.300216	0.6688	#REF!	#REF!	#REF!	141.667	FALSE			32.7994	76.555	170.544
426	3.24758	390.05	0.123719	0.290271	0.671318	#REF!	#REF!	#REF!	142	TRUE			31.5484	74.019	171.186
427	3.24558	390.29	0.122562	0.28842	0.664592	#REF!	#REF!	#REF!	142.333	FALSE			31.2533	73.547	169.471
428	3.24358	390.531	0.127135	0.292933	0.662745	#REF!	#REF!	#REF!	142.667	FALSE			32.4194	74.698	169
429	3.24158	390.772	0.128212	0.295376	0.675149	#REF!	#REF!	#REF!	143	TRUE			32.694	75.321	172.163
430	3.23958	391.013	0.121911	0.292898	0.678431	#REF!	#REF!	#REF!	143.333	FALSE			31.0874	74.689	173
431	3.23758	391.255	0.120162	0.289157	0.656863	#REF!	#REF!	#REF!	143.667	FALSE			30.6413	73.735	167.5
432	3.23558	391.497	0.125056	0.290075	0.651306	#REF!	#REF!	#REF!	144	TRUE			31.8894	73.969	166.083
433	3.23358	391.739	0.126185	0.292055	0.653251	#REF!	#REF!	#REF!	144.333	FALSE			32.1772	74.474	166.579
434	3.23158	391.982	0.126363	0.28942	0.654008	#REF!	#REF!	#REF!	144.667	FALSE			32.2225	73.802	166.772
435	3.22958	392.225	0.126053	0.286788	0.669737	#REF!	#REF!	#REF!	145	TRUE			32.1435	73.131	170.783
436	3.22757	392.468	0.12564	0.286275	0.674188	#REF!	#REF!	#REF!	145.333	FALSE			32.0381	73	171.918
437	3.22557	392.711	0.125226	0.285235	0.684741	#REF!	#REF!	#REF!	145.667	FALSE			31.9326	72.735	174.609
438	3.22357	392.955	0.123937	0.285051	0.688004	#REF!	#REF!	#REF!	146	TRUE			31.6039	72.688	175.441
439	3.22157	393.199	0.123802	0.282953	0.677078	#REF!	#REF!	#REF!	146.333	FALSE			31.5695	72.153	172.655
440	3.21957	393.444	0.126394	0.282353	0.673682	#REF!	#REF!	#REF!	146.667	FALSE			32.2305	72	171.789
441	3.21757	393.688	0.126971	0.285431	0.678082	#REF!	#REF!	#REF!	147	TRUE			32.3777	72.785	172.911
442	3.21557	393.933	0.124873	0.289349	0.679271	#REF!	#REF!	#REF!	147.333	FALSE			31.8427	73.784	173.214
443	3.21357	394.179	0.124118	0.290196	0.677271	#REF!	#REF!	#REF!	147.667	FALSE			31.6501	74	172.704
444	3.21157	394.424	0.133446	0.289686	0.676455	#REF!	#REF!	#REF!	148	TRUE			34.0287	73.87	172.496
445	3.20957	394.67	0.136187	0.289643	0.681914	#REF!	#REF!	#REF!	148.333	FALSE			34.7277	73.859	173.888
446	3.20756	394.916	0.132468	0.283243	0.683988	#REF!	#REF!	#REF!	148.667	FALSE			33.7793	72.227	174.417
447	3.20556	395.163	0.131611	0.279129	0.672529	#REF!	#REF!	#REF!	149	TRUE			33.5608	71.178	171.495
448	3.20356	395.41	0.129938	0.284769	0.668529	#REF!	#REF!	#REF!	149.333	FALSE			33.1341	72.616	170.475
449	3.20156	395.657	0.129412	0.280455	0.687565	#REF!	#REF!	#REF!	149.667	FALSE			33	71.516	175.329
450	3.19956	395.904	0.127642	0.2724	0.693671	#REF!	#REF!	#REF!	150	TRUE			32.5487	69.462	176.886
451	3.19756	396.152	0.126834	0.270608	0.694118	#REF!	#REF!	#REF!	150.333	FALSE			32.3426	69.005	177
452	3.19556	396.4	0.128238	0.276725	0.694118	#REF!	#REF!	#REF!	150.667	FALSE			32.7006	70.565	177
453	3.19356	396.648	0.128929	0.284541	0.681898	#REF!	#REF!	#REF!	151	TRUE			32.877	72.558	173.884
454	3.19156	396.897	0.132296	0.289086	0.678431	#REF!	#REF!	#REF!	151.333	FALSE			33.7355	73.717	173
455	3.18956	397.146	0.133299	0.28369	0.693686	#REF!	#REF!	#REF!	151.667	FALSE			33.9912	72.341	176.89
456	3.18755	397.395	0.133333	0.276533	0.698039	#REF!	#REF!	#REF!	152	TRUE			34	70.516	178
457	3.18555	397.645	0.133333	0.278153	0.688898	#REF!	#REF!	#REF!	152.333	FALSE			34	70.929	175.669
458	3.18355	397.895	0.130288	0.281094	0.686275	#REF!	#REF!	#REF!	152.667	FALSE			33.2235	71.679	175
459	3.18155	398.145	0.129412	0.278522	0.695404	#REF!	#REF!	#REF!	153	TRUE			33	71.023	177.328
460	3.17955	398.396	0.135494	0.279906	0.698039	#REF!	#REF!	#REF!	153.333	FALSE			34.551	71.376	178
461	3.17755	398.647	0.137255	0.286475	0.704118	#REF!	#REF!	#REF!	153.667	FALSE			35	73.051	179.55
462	3.17555	398.898	0.137255	0.285843	0.705882	#REF!	#REF!	#REF!	154	TRUE			35	72.89	180
463	3.17355	399.149	0.137255	0.285106	0.705882	#REF!	#REF!	#REF!	154.333	FALSE			35	72.702	180
464	3.17155	399.401	0.140288	0.279922	0.705882	#REF!	#REF!	#REF!	154.667	FALSE			35.7735	71.38	180
465	3.16955	399.653	0.141176	0.2754	0.69982	#REF!	#REF!	#REF!	155	TRUE			36	70.227	178.454
466	3.16755	399.906	0.138147	0.278318	0.698039	#REF!	#REF!	#REF!	155.333	FALSE			35.2274	70.971	178
467	3.16554	400.159	0.137255	0.285306	0.72529	#REF!	#REF!	#REF!	155.667	FALSE			35	72.753	184.949
468	3.16354	400.412	0.137255	0.286416	0.733333	#REF!	#REF!	#REF!	156	TRUE			35	73.036	187
469	3.16154	400.665	0.137255	0.286275	0.727286	#REF!	#REF!	#REF!	156.333	FALSE			35	73	185.458
470	3.15954	400.919	0.140277	0.286463	0.72549	#REF!	#REF!	#REF!	156.667	FALSE			35.7706	73.048	185
471	3.15754	401.173	0.141176	0.281776	0.719451	#REF!	#REF!	#REF!	157	TRUE			36	71.853	183.46
472	3.15554	401.427	0.141176	0.277306	0.717647	#REF!	#REF!	#REF!	157.333	FALSE			36	70.713	183
473	3.15354	401.682	0.141176	0.282337	0.726694	#REF!	#REF!	#REF!	157.667	FALSE			36	71.996	185.307
474	3.15154	401.937	0.147205	0.290482	0.729412	#REF!	#REF!	#REF!	158	TRUE			37.5373	74.073	186
475	3.14954	402.192	0.14902	0.295525	0.738451	#REF!	#REF!	#REF!	158.333	FALSE			38	75.359	188.305
476	3.14754	402.448	0.14902	0.294678	0.741176	#REF!	#REF!	#REF!	158.667	FALSE			38	75.143	189
477	3.14553	402.704	0.14902	0.287016	0.729141	#REF!	#REF!	#REF!	159	TRUE			38	73.189	185.931
478	3.14353	402.96	0.152026	0.281973	0.72549	#REF!	#REF!	#REF!	159.333	FALSE			38.7667	71.903	185
479	3.14153	403.217	0.152941	0.288953	0.746525	#REF!	#REF!	#REF!	159.667	FALSE			39	73.683	190.364
480	3.13953	403.474	0.152941	0.291322	0.752941	#REF!	#REF!	#REF!	160	TRUE			39	74.287	192
481	3.13753	403.731	0.152941	0.288224	0.755941	#REF!	#REF!	#REF!	160.333	FALSE			39	73.497	192.765
482	3.13553	403.989	0.158939	0.290922	0.756863	#REF!	#REF!	#REF!	160.667	FALSE			40.5295	74.185	193
483	3.13353	404.247	0.160784	0.291875	0.762859	#REF!	#REF!	#REF!	161	TRUE			41	74.428	194.529
484	3.13153	404.505	0.160784	0.290545	0.764706	#REF!	#REF!	#REF!	161.333	FALSE			41	74.089	195
485	3.12953	404.764	0.160784	0.296184	0.767698	#REF!	#REF!	#REF!	161.667	FALSE			41	75.527	195.763
486	3.12753	405.023	0.157793	0.301031	0.768627	#REF!	#REF!	#REF!	162	TRUE			40.2372	76.763	196
487	3.12552	405.282	0.156863	0.298973	0.777596	#REF!	#REF!	#REF!	162.333	FALSE			40	76.238	198.287
488	3.12352	405.542	0.153875	0.300753	0.780392	#REF!	#REF!	#REF!	162.667	FALSE			39.2382	76.692	199
489	3.12152	405.802	0.152941	0.298914	0.771435	#REF!	#REF!	#REF!	163	TRUE			39	76.223	196.716
490	3.11952	406.062	0.155925	0.298039	0.768627	#REF!	#REF!	#REF!	163.333	FALSE			39.7609	76	196
491	3.11752	406.323	0.156863	0.298039	0.777573	#REF!	#REF!	#REF!	163.667	FALSE			40	76	198.281
492	3.11552	406.584	0.159843	0.298039	0.780278	#REF!	#REF!	#REF!	164	TRUE			40.7599	76	198.971
493	3.11352	406.845	0.160784	0.29822	0.783318	#REF!	#REF!	#REF!	164.333	FALSE			41	76.046	199.746
494	3.11152	407.107	0.1608	0.30442	0.784529	#REF!	#REF!	#REF!	164.667	FALSE			41.0039	77.627	200.055
495	3.10952	407.369	0.160606	0.306267	0.798318	#REF!	#REF!	#REF!	165	TRUE			40.9546	78.098	203.571
496	3.10752	407.631	0.154985	0.303318	0.802298	#REF!	#REF!	#REF!	165.333	FALSE			39.5211	77.346	204.586
497	3.10551	407.894	0.153326	0.307643	0.800776	#REF!	#REF!	#REF!	165.667	FALSE			39.0981	78.449	204.198
498	3.10351	408.157	0.15083	0.306239	0.799741	#REF!	#REF!	#REF!	166	TRUE			38.4617	78.091	203.934
499	3.10151	408.42	0.150202	0.302224	0.796282	#REF!	#REF!	#REF!	166.333	FALSE			38.3016	77.067	203.052
500	3.09951	408.684	0.166096	0.304137	0.79529	#REF!	#REF!	#REF!	166.667	FALSE			42.3545	77.555	202.799
501	3.09751	408.948	0.170953	0.302035	0.803125	#REF!	#REF!	#REF!	167	TRUE			43.593	77.019	204.797
502	3.09551	409.212	0.163905	0.29802	0.805882	#REF!	#REF!	#REF!	167.333	FALSE			41.7959	75.995	205.5
503	3.09351	409.477	0.161789	0.2994	0.803925	#REF!	#REF!	#REF!	167.667	FALSE			41.2562	76.347	205.001
504	3.09151	409.742	0.168642	0.303337	0.803514	#REF!	#REF!	#REF!	168	TRUE			43.0037	77.351	204.896
505	3.08951	410.007	0.171051	0.301631	0.815714	#REF!	#REF!	#REF!	168.333	FALSE			43.6179	76.916	208.007
506	3.08751	410.273	0.163371	0.305478	0.819608	#REF!	#REF!	#REF!	168.667	FALSE			41.6595	77.897	209
507	3.08551	410.539	0.160784	0.309839	0.823729	#REF!	#REF!	#REF!	169	TRUE			41	79.009	210.051
508	3.0835	410.805	0.169632	0.309447	0.824416	#REF!	#REF!	#REF!	169.333	FALSE			43.2562	78.909	210.226
509	3.0815	411.072	0.172549	0.3066	0.825922	#REF!	#REF!	#REF!	169.667	FALSE			44	78.183	210.61
510	3.0795	411.339	0.168655	0.299992	0.825682	#REF!	#REF!	#REF!	170	TRUE			43.007	76.498	210.549
511	3.0775	411.607	0.167054	0.296478	0.820039	#REF!	#REF!	#REF!	170.333	FALSE			42.5988	75.602	209.11
512	3.0755	411.874	0.166744	0.298996	0.817816	#REF!	#REF!	#REF!	170.667	FALSE			42.5198	76.244	208.543
513	3.0735	412.142	0.166434	0.303012	0.816161	#REF!	#REF!	#REF!	171	TRUE			42.4407	77.268	208.121
514	3.0715	412.411	0.169333	0.298212	0.81602	#REF!	#REF!	#REF!	171.333	FALSE			43.1799	76.044	208.085
515	3.0695	412.68	0.170304	0.297612	0.844694	#REF!	#REF!	#REF!	171.667	FALSE			43.4275	75.891	215.397
516	3.0675	412.949	0.174892	0.298039	0.854737	#REF!	#REF!	#REF!	172	TRUE			44.5974	76	217.958
517	3.0655	413.219	0.176471	0.296231	0.831506	#REF!	#REF!	#REF!	172.333	FALSE			45	75.539	212.034
518	3.06349	413.488	0.169722	0.292596	0.822259	#REF!	#REF!	#REF!	172.667	FALSE			43.2792	74.612	209.676
519	3.06149	413.759	0.167232	0.288584	0.830714	#REF!	#REF!	#REF!	173	TRUE			42.6442	73.589	211.832
520	3.05949	414.029	0.175269	0.296275	0.833812	#REF!	#REF!	#REF!	173.333	FALSE			44.6936	75.55	212.622
521	3.05749	414.3	0.178279	0.301251	0.838204	#REF!	#REF!	#REF!	173.667	FALSE			45.4612	76.819	213.742
522	3.05549	414.572	0.175482	0.302725	0.840055	#REF!	#REF!	#REF!	174	TRUE			44.7479	77.195	214.214
523	3.05349	414.843	0.174249	0.299278	0.842973	#REF!	#REF!	#REF!	174.333	FALSE			44.4334	76.316	214.958
524	3.05149	415.115	0.182384	0.295741	0.843396	#REF!	#REF!	#REF!	174.667	FALSE			46.5078	75.414	215.066
525	3.04949	415.388	0.185663	0.297776	0.8378	#REF!	#REF!	#REF!	175	TRUE			47.3441	75.933	213.639
526	3.04749	415.66	0.178936	0.292855	0.835937	#REF!	#REF!	#REF!	175.333	FALSE			45.6288	74.678	213.164
527	3.04549	415.934	0.176471	0.293251	0.845047	#REF!	#REF!	#REF!	175.667	FALSE			45	74.779	215.487
528	3.04348	416.207	0.176965	0.29669	0.848714	#REF!	#REF!	#REF!	176	TRUE			45.1261	75.656	216.422
529	3.04148	416.481	0.17693	0.292659	0.842322	#REF!	#REF!	#REF!	176.333	FALSE			45.1171	74.628	214.792
530	3.03948	416.755	0.185258	0.290722	0.839741	#REF!	#REF!	#REF!	176.667	FALSE			47.2407	74.134	214.134
531	3.03748	417.03	0.188235	0.290404	0.845235	#REF!	#REF!	#REF!	177	TRUE			48	74.053	215.535
532	3.03548	417.304	0.185332	0.290267	0.847129	#REF!	#REF!	#REF!	177.333	FALSE			47.2596	74.018	216.018
533	3.03348	417.58	0.184314	0.298875	0.838353	#REF!	#REF!	#REF!	177.667	FALSE			47	76.213	213.78
534	3.03148	417.855	0.184314	0.299031	0.835294	#REF!	#REF!	#REF!	178	TRUE			47	76.253	213
535	3.02948	418.131	0.184314	0.295141	0.855576	#REF!	#REF!	#REF!	178.333	FALSE			47	75.261	218.172
536	3.02748	418.408	0.190105	0.291224	0.862745	#REF!	#REF!	#REF!	178.667	FALSE			48.4768	74.262	220
537	3.02548	418.684	0.192157	0.284408	0.874322	#REF!	#REF!	#REF!	179	TRUE			49	72.524	222.952
538	3.02347	418.961	0.195049	0.290659	0.878431	#REF!	#REF!	#REF!	179.333	FALSE			49.7374	74.118	224
539	3.02147	419.239	0.196078	0.293961	0.86109	#REF!	#REF!	#REF!	179.667	FALSE			50	74.96	219.578
540	3.01947	419.517	0.181638	0.291231	0.854902	#REF!	#REF!	#REF!	180	TRUE			46.3177	74.264	218
541	3.01747	419.795	0.176471	0.290776	0.857788	#REF!	#REF!	#REF!	180.333	FALSE			45	74.148	218.736
542	3.01547	420.074	0.190892	0.288851	0.858824	#REF!	#REF!	#REF!	180.667	FALSE			48.6774	73.657	219
543	3.01347	420.352	0.196078	0.287518	0.855941	#REF!	#REF!	#REF!	181	TRUE			50	73.317	218.265
544	3.01147	420.632	0.196078	0.290737	0.854902	#REF!	#REF!	#REF!	181.333	FALSE			50	74.138	218
545	3.00947	420.911	0.196078	0.288894	0.834753	#REF!	#REF!	#REF!	181.667	FALSE			50	73.668	212.862
546	3.00747	421.191	0.187449	0.285627	0.827451	#REF!	#REF!	#REF!	182	TRUE			47.7994	72.835	211
547	3.00547	421.472	0.184314	0.282208	0.836075	#REF!	#REF!	#REF!	182.333	FALSE			47	71.963	213.199
548	3.00347	421.753	0.190059	0.279212	0.839216	#REF!	#REF!	#REF!	182.667	FALSE			48.4651	71.199	214
549	3.00146	422.034	0.192157	0.278431	0.836345	#REF!	#REF!	#REF!	183	TRUE			49	71	213.268
550	2.99946	422.315	0.189288	0.279639	0.835294	#REF!	#REF!	#REF!	183.333	FALSE			48.2684	71.308	213
551	2.99746	422.597	0.188235	0.283047	0.849627	#REF!	#REF!	#REF!	183.667	FALSE			48	72.177	216.655
552	2.99546	422.88	0.1911	0.278639	0.854902	#REF!	#REF!	#REF!	184	TRUE			48.7306	71.053	218
553	2.99346	423.162	0.192157	0.273627	0.829133	#REF!	#REF!	#REF!	184.333	FALSE			49	69.775	211.429
554	2.99146	423.445	0.186435	0.275443	0.819608	#REF!	#REF!	#REF!	184.667	FALSE			47.5408	70.238	209
555	2.98946	423.729	0.184314	0.276639	0.831047	#REF!	#REF!	#REF!	185	TRUE			47	70.543	211.917
556	2.98746	424.013	0.192886	0.273878	0.835294	#REF!	#REF!	#REF!	185.333	FALSE			49.1859	69.839	213
557	2.98546	424.297	0.196078	0.27291	0.852427	#REF!	#REF!	#REF!	185.667	FALSE			50	69.592	217.369
558	2.98346	424.581	0.198932	0.271247	0.858824	#REF!	#REF!	#REF!	186	TRUE			50.7277	69.168	219
559	2.98145	424.866	0.2	0.271612	0.858824	#REF!	#REF!	#REF!	186.333	FALSE			51	69.261	219
560	2.97945	425.152	0.2	0.2776	0.858824	#REF!	#REF!	#REF!	186.667	FALSE			51	70.788	219
561	2.97745	425.437	0.2	0.274835	0.850278	#REF!	#REF!	#REF!	187	TRUE			51	70.083	216.821
562	2.97545	425.723	0.197154	0.271204	0.847059	#REF!	#REF!	#REF!	187.333	FALSE			50.2743	69.157	216
563	2.97345	426.01	0.196078	0.270588	0.841373	#REF!	#REF!	#REF!	187.667	FALSE			50	69	214.55
564	2.97145	426.297	0.196078	0.272082	0.839216	#REF!	#REF!	#REF!	188	TRUE			50	69.381	214
565	2.96945	426.584	0.196078	0.270604	0.844898	#REF!	#REF!	#REF!	188.333	FALSE			50	69.004	215.449
566	2.96745	426.872	0.196078	0.267545	0.847059	#REF!	#REF!	#REF!	188.667	FALSE			50	68.224	216
567	2.96545	427.16	0.196078	0.266667	0.847059	#REF!	#REF!	#REF!	189	TRUE			50	68	216
568	2.96345	427.448	0.198913	0.264227	0.847059	#REF!	#REF!	#REF!	189.333	FALSE			50.7228	67.378	216
569	2.96144	427.737	0.2	0.266027	0.8244	#REF!	#REF!	#REF!	189.667	FALSE			51	67.837	210.222
570	2.95944	428.026	0.199938	0.264706	0.815686	#REF!	#REF!	#REF!	190	TRUE			50.9841	67.5	208
571	2.95744	428.316	0.199811	0.26051	0.838318	#REF!	#REF!	#REF!	190.333	FALSE			50.9517	66.43	213.771
572	2.95544	428.606	0.210592	0.264451	0.847059	#REF!	#REF!	#REF!	190.667	FALSE			53.701	67.435	216
573	2.95344	428.896	0.214498	0.272247	0.841408	#REF!	#REF!	#REF!	191	TRUE			54.6969	69.423	214.559
574	2.95144	429.187	0.201871	0.266031	0.839243	#REF!	#REF!	#REF!	191.333	FALSE			51.477	67.838	214.007
575	2.94944	429.478	0.197284	0.260012	0.820118	#REF!	#REF!	#REF!	191.667	FALSE			50.3075	66.303	209.13
576	2.94744	429.77	0.203918	0.261863	0.81329	#REF!	#REF!	#REF!	192	TRUE			51.999	66.775	207.389
577	2.94544	430.062	0.206224	0.265651	0.822188	#REF!	#REF!	#REF!	192.333	FALSE			52.5871	67.741	209.658
578	2.94344	430.354	0.198033	0.266667	0.825988	#REF!	#REF!	#REF!	192.667	FALSE			50.4984	68	210.627
579	2.94143	430.647	0.195206	0.266306	0.830012	#REF!	#REF!	#REF!	193	TRUE			49.7775	67.908	211.653
580	2.93943	430.94	0.206362	0.263686	0.831373	#REF!	#REF!	#REF!	193.333	FALSE			52.6224	67.24	212
581	2.93743	431.234	0.210542	0.260435	0.824941	#REF!	#REF!	#REF!	193.667	FALSE			53.6881	66.411	210.36
582	2.93543	431.527	0.211306	0.262424	0.822776	#REF!	#REF!	#REF!	194	TRUE			53.883	66.918	209.808
583	2.93343	431.822	0.21103	0.261725	0.832106	#REF!	#REF!	#REF!	194.333	FALSE			53.8126	66.74	212.187
584	2.93143	432.117	0.20809	0.255169	0.835282	#REF!	#REF!	#REF!	194.667	FALSE			53.063	65.068	212.997
585	2.92943	432.412	0.206856	0.254286	0.830067	#REF!	#REF!	#REF!	195	TRUE			52.7482	64.843	211.667
586	2.92743	432.707	0.204356	0.257702	0.827847	#REF!	#REF!	#REF!	195.333	FALSE			52.1109	65.714	211.101
587	2.92543	433.003	0.203686	0.258824	0.828467	#REF!	#REF!	#REF!	195.667	FALSE			51.94	66	211.259
588	2.92343	433.3	0.216465	0.258824	0.828639	#REF!	#REF!	#REF!	196	TRUE			55.1987	66	211.303
589	2.92143	433.596	0.221836	0.257071	0.823522	#REF!	#REF!	#REF!	196.333	FALSE			56.5681	65.553	209.998
590	2.91942	433.894	0.210428	0.253667	0.821918	#REF!	#REF!	#REF!	196.667	FALSE			53.6592	64.685	209.589
591	2.91742	434.191	0.205587	0.255424	0.814502	#REF!	#REF!	#REF!	197	TRUE			52.4246	65.133	207.698
592	2.91542	434.489	0.213849	0.256651	0.810863	#REF!	#REF!	#REF!	197.333	FALSE			54.5315	65.446	206.77
593	2.91342	434.788	0.217145	0.251173	0.806937	#REF!	#REF!	#REF!	197.667	FALSE			55.3719	64.049	205.769
594	2.91142	435.086	0.21223	0.249	0.805824	#REF!	#REF!	#REF!	198	TRUE			54.1187	63.495	205.485
595	2.90942	435.386	0.21068	0.247651	0.807447	#REF!	#REF!	#REF!	198.333	FALSE			53.7233	63.151	205.899
596	2.90742	435.685	0.215979	0.247059	0.808184	#REF!	#REF!	#REF!	198.667	FALSE			55.0746	63	206.087
597	2.90542	435.985	0.217776	0.248259	0.813871	#REF!	#REF!	#REF!	199	TRUE			55.5329	63.306	207.537
598	2.90342	436.286	0.211349	0.248659	0.816988	#REF!	#REF!	#REF!	199.333	FALSE			53.8939	63.408	208.332
599	2.90142	436.587	0.208682	0.245784	0.811831	#REF!	#REF!	#REF!	199.667	FALSE			53.2138	62.675	207.017
600	2.89941	436.888	0.214125	0.241773	0.809251	#REF!	#REF!	#REF!	200	TRUE			54.6018	61.652	206.359
601	2.89741	437.19	0.216318	0.244216	0.786075	#REF!	#REF!	#REF!	200.333	FALSE			55.1611	62.275	200.449
602	2.89541	437.492	0.223031	0.248612	0.775918	#REF!	#REF!	#REF!	200.667	FALSE			56.8728	63.396	197.859
603	2.89341	437.794	0.226176	0.249859	0.77851	#REF!	#REF!	#REF!	201	TRUE			57.675	63.714	198.52
604	2.89141	438.097	0.216558	0.247192	0.779541	#REF!	#REF!	#REF!	201.333	FALSE			55.2222	63.034	198.783
605	2.88941	438.401	0.212201	0.24402	0.776639	#REF!	#REF!	#REF!	201.667	FALSE			54.1113	62.225	198.043
606	2.88741	438.705	0.22816	0.243137	0.775639	#REF!	#REF!	#REF!	202	TRUE			58.1809	62	197.788
607	2.88541	439.009	0.23526	0.243655	0.78229	#REF!	#REF!	#REF!	202.333	FALSE			59.9912	62.132	199.484
608	2.88341	439.314	0.224262	0.243329	0.784953	#REF!	#REF!	#REF!	202.667	FALSE			57.1869	62.049	200.163
609	2.88141	439.619	0.219608	0.240765	0.787306	#REF!	#REF!	#REF!	203	TRUE			56	61.395	200.763
610	2.8794	439.924	0.219608	0.24242	0.789008	#REF!	#REF!	#REF!	203.333	FALSE			56	61.817	201.197
611	2.8774	440.23	0.219608	0.24349	0.781153	#REF!	#REF!	#REF!	203.667	FALSE			56	62.09	199.194
612	2.8754	440.536	0.225108	0.243396	0.777247	#REF!	#REF!	#REF!	204	TRUE			57.4026	62.066	198.198
613	2.8734	440.843	0.227451	0.243184	0.777302	#REF!	#REF!	#REF!	204.333	FALSE			58	62.012	198.212
614	2.8714	441.15	0.224705	0.240392	0.776871	#REF!	#REF!	#REF!	204.667	FALSE			57.2997	61.3	198.102
615	2.8694	441.458	0.223529	0.239196	0.795682	#REF!	#REF!	#REF!	205	TRUE			57	60.995	202.899
616	2.8674	441.766	0.220787	0.23909	0.803922	#REF!	#REF!	#REF!	205.333	FALSE			56.3006	60.968	205
617	2.8654	442.075	0.219608	0.238996	0.773773	#REF!	#REF!	#REF!	205.667	FALSE			56	60.944	197.312
618	2.8634	442.384	0.227824	0.23638	0.760784	#REF!	#REF!	#REF!	206	TRUE			58.0952	60.277	194
619	2.8614	442.693	0.231373	0.235294	0.758047	#REF!	#REF!	#REF!	206.333	FALSE			59	60	193.302
620	2.85939	443.003	0.231373	0.236	0.756863	#REF!	#REF!	#REF!	206.667	FALSE			59	60.18	193
621	2.85739	443.313	0.231373	0.239231	0.762329	#REF!	#REF!	#REF!	207	TRUE			59	61.004	194.394
622	2.85539	443.624	0.228642	0.240125	0.764706	#REF!	#REF!	#REF!	207.333	FALSE			58.3036	61.232	195
623	2.85339	443.935	0.227451	0.237282	0.778353	#REF!	#REF!	#REF!	207.667	FALSE			58	60.507	198.48
624	2.85139	444.246	0.224724	0.232839	0.784314	#REF!	#REF!	#REF!	208	TRUE			57.3045	59.374	200
625	2.84939	444.558	0.223529	0.231373	0.776137	#REF!	#REF!	#REF!	208.333	FALSE			57	59	197.915
626	2.84739	444.871	0.2317	0.235596	0.772549	#REF!	#REF!	#REF!	208.667	FALSE			59.0835	60.077	197
627	2.84539	445.183	0.235294	0.234925	0.772549	#REF!	#REF!	#REF!	209	TRUE			60	59.906	197
628	2.84339	445.497	0.221696	0.232153	0.772549	#REF!	#REF!	#REF!	209.333	FALSE			56.5325	59.199	197
629	2.84139	445.81	0.215686	0.23409	0.756243	#REF!	#REF!	#REF!	209.667	FALSE			55	59.693	192.842
630	2.83939	446.125	0.231981	0.237682	0.74902	#REF!	#REF!	#REF!	210	TRUE			59.1552	60.609	191
631	2.83738	446.439	0.239216	0.233031	0.754447	#REF!	#REF!	#REF!	210.333	FALSE			61	59.423	192.384
632	2.83538	446.754	0.236504	0.229906	0.756863	#REF!	#REF!	#REF!	210.667	FALSE			60.3084	58.626	193
633	2.83338	447.07	0.235294	0.235043	0.743314	#REF!	#REF!	#REF!	211	TRUE			60	59.936	189.545
634	2.83138	447.386	0.240711	0.237212	0.737255	#REF!	#REF!	#REF!	211.333	FALSE			61.3812	60.489	188
635	2.82938	447.702	0.243137	0.231824	0.742667	#REF!	#REF!	#REF!	211.667	FALSE			62	59.115	189.38
636	2.82738	448.019	0.235024	0.228192	0.745098	#REF!	#REF!	#REF!	212	TRUE			59.9312	58.189	190
637	2.82538	448.336	0.231373	0.229027	0.753204	#REF!	#REF!	#REF!	212.333	FALSE			59	58.402	192.067
638	2.82338	448.654	0.236774	0.229682	0.756863	#REF!	#REF!	#REF!	212.667	FALSE			60.3773	58.569	193
639	2.82138	448.972	0.239216	0.232475	0.746067	#REF!	#REF!	#REF!	213	TRUE			61	59.281	190.247
640	2.81938	449.291	0.244609	0.231098	0.741176	#REF!	#REF!	#REF!	213.333	FALSE			62.3753	58.93	189
641	2.81737	449.61	0.247059	0.229969	0.714227	#REF!	#REF!	#REF!	213.667	FALSE			63	58.642	182.128
642	2.81537	449.929	0.236287	0.230961	0.701961	#REF!	#REF!	#REF!	214	TRUE			60.2533	58.895	179
643	2.81337	450.25	0.231373	0.228682	0.72349	#REF!	#REF!	#REF!	214.333	FALSE			59	58.314	184.49
644	2.81137	450.57	0.244818	0.228608	0.733333	#REF!	#REF!	#REF!	214.667	FALSE			62.4285	58.295	187
645	2.80937	450.891	0.25098	0.230027	0.730647	#REF!	#REF!	#REF!	215	TRUE			64	58.657	186.315
646	2.80737	451.212	0.250785	0.228396	0.729412	#REF!	#REF!	#REF!	215.333	FALSE			63.9502	58.241	186
647	2.80537	451.534	0.250578	0.224769	0.734776	#REF!	#REF!	#REF!	215.667	FALSE			63.8975	57.316	187.368
648	2.80337	451.856	0.243368	0.226714	0.737255	#REF!	#REF!	#REF!	216	TRUE			62.0588	57.812	188
649	2.80137	452.179	0.240439	0.230769	0.731894	#REF!	#REF!	#REF!	216.333	FALSE			61.3119	58.846	186.633
650	2.79937	452.502	0.241098	0.229239	0.729412	#REF!	#REF!	#REF!	216.667	FALSE			61.4799	58.456	186
651	2.79736	452.826	0.241673	0.230573	0.721384	#REF!	#REF!	#REF!	217	TRUE			61.6266	58.796	183.953
652	2.79536	453.15	0.241108	0.229051	0.717647	#REF!	#REF!	#REF!	217.333	FALSE			61.4825	58.408	183
653	2.79336	453.475	0.240858	0.227706	0.701616	#REF!	#REF!	#REF!	217.667	FALSE			61.4187	58.065	178.912
654	2.79136	453.8	0.246557	0.230173	0.694118	#REF!	#REF!	#REF!	218	TRUE			62.872	58.694	177
655	2.78936	454.125	0.248925	0.231373	0.694118	#REF!	#REF!	#REF!	218.333	FALSE			63.4758	59	177
656	2.78736	454.451	0.251384	0.234008	0.694302	#REF!	#REF!	#REF!	218.667	FALSE			64.103	59.672	177.047
657	2.78536	454.778	0.252433	0.230012	0.704933	#REF!	#REF!	#REF!	219	TRUE			64.3704	58.653	179.758
658	2.78336	455.105	0.251318	0.225012	0.70958	#REF!	#REF!	#REF!	219.333	FALSE			64.0861	57.378	180.943
659	2.78136	455.432	0.250578	0.228737	0.689282	#REF!	#REF!	#REF!	219.667	FALSE			63.8975	58.328	175.767
660	2.77936	455.76	0.256632	0.22858	0.680086	#REF!	#REF!	#REF!	220	TRUE			65.4412	58.288	173.422
661	2.77735	456.088	0.259449	0.225141	0.691439	#REF!	#REF!	#REF!	220.333	FALSE			66.1596	57.411	176.317
662	2.77535	456.417	0.260144	0.224133	0.697141	#REF!	#REF!	#REF!	220.667	FALSE			66.3368	57.154	177.771
663	2.77335	456.747	0.260678	0.224231	0.690137	#REF!	#REF!	#REF!	221	TRUE			66.4729	57.179	175.985
664	2.77135	457.076	0.255484	0.224325	0.687129	#REF!	#REF!	#REF!	221.333	FALSE			65.1484	57.203	175.218
665	2.76935	457.407	0.252841	0.225867	0.696733	#REF!	#REF!	#REF!	221.667	FALSE			64.4744	57.596	177.667
666	2.76735	457.737	0.257671	0.229776	0.700973	#REF!	#REF!	#REF!	222	TRUE			65.706	58.593	178.748
667	2.76535	458.069	0.260667	0.237847	0.685737	#REF!	#REF!	#REF!	222.333	FALSE			66.47	60.651	174.863
668	2.76335	458.4	0.260671	0.238137	0.678431	#REF!	#REF!	#REF!	222.667	FALSE			66.4712	60.725	173
669	2.76135	458.732	0.260271	0.2296	0.681867	#REF!	#REF!	#REF!	223	TRUE			66.369	58.548	173.876
670	2.75935	459.065	0.264615	0.227004	0.683914	#REF!	#REF!	#REF!	223.333	FALSE			67.4768	57.886	174.398
671	2.75735	459.398	0.266466	0.227773	0.67838	#REF!	#REF!	#REF!	223.667	FALSE			67.9488	58.082	172.987
672	2.75534	459.732	0.258593	0.227165	0.67531	#REF!	#REF!	#REF!	224	TRUE			65.9412	57.927	172.204
673	2.75334	460.066	0.254902	0.227251	0.6746	#REF!	#REF!	#REF!	224.333	FALSE			65	57.949	172.023
674	2.75134	460.401	0.258293	0.22482	0.675016	#REF!	#REF!	#REF!	224.667	FALSE			65.8646	57.329	172.129
675	2.74934	460.736	0.260265	0.220898	0.677827	#REF!	#REF!	#REF!	225	TRUE			66.3675	56.329	172.846
676	2.74734	461.071	0.265345	0.223537	0.678498	#REF!	#REF!	#REF!	225.333	FALSE			67.6631	57.002	173.017
677	2.74534	461.407	0.268108	0.226827	0.682212	#REF!	#REF!	#REF!	225.667	FALSE			68.3675	57.841	173.964
678	2.74334	461.744	0.269904	0.224827	0.684137	#REF!	#REF!	#REF!	226	TRUE			68.8256	57.331	174.455
679	2.74134	462.081	0.270588	0.224659	0.666455	#REF!	#REF!	#REF!	226.333	FALSE			69	57.288	169.946
680	2.73934	462.418	0.260108	0.226678	0.657357	#REF!	#REF!	#REF!	226.667	FALSE			66.3275	57.803	167.626
681	2.73734	462.756	0.254902	0.228451	0.667914	#REF!	#REF!	#REF!	227	TRUE			65	58.255	170.318
682	2.73533	463.095	0.260135	0.228855	0.673937	#REF!	#REF!	#REF!	227.333	FALSE			66.3343	58.358	171.854
683	2.73333	463.434	0.262745	0.229631	0.659694	#REF!	#REF!	#REF!	227.667	FALSE			67	58.556	168.222
684	2.73133	463.773	0.265358	0.227549	0.652192	#REF!	#REF!	#REF!	228	TRUE			67.6662	58.025	166.309
685	2.72933	464.113	0.266667	0.224467	0.657698	#REF!	#REF!	#REF!	228.333	FALSE			68	57.239	167.713
686	2.72733	464.454	0.269275	0.228745	0.660706	#REF!	#REF!	#REF!	228.667	FALSE			68.6652	58.33	168.48
687	2.72533	464.795	0.270588	0.23398	0.64909	#REF!	#REF!	#REF!	229	TRUE			69	59.665	165.518
688	2.72333	465.137	0.275798	0.235294	0.643137	#REF!	#REF!	#REF!	229.333	FALSE			70.3285	60	164
689	2.72133	465.479	0.278431	0.237898	0.641361	#REF!	#REF!	#REF!	229.667	FALSE			71	60.664	163.547
690	2.71933	465.821	0.27583	0.236616	0.641322	#REF!	#REF!	#REF!	230	TRUE			70.3367	60.337	163.537
691	2.71733	466.164	0.27451	0.232694	0.627494	#REF!	#REF!	#REF!	230.333	FALSE			70	59.337	160.011
692	2.71532	466.508	0.261524	0.233969	0.619255	#REF!	#REF!	#REF!	230.667	FALSE			66.6886	59.662	157.91
693	2.71332	466.852	0.254902	0.233161	0.633412	#REF!	#REF!	#REF!	231	TRUE			65	59.456	161.52
694	2.71132	467.196	0.275649	0.234306	0.641612	#REF!	#REF!	#REF!	231.333	FALSE			70.2904	59.748	163.611
695	2.70932	467.541	0.286275	0.237835	0.622502	#REF!	#REF!	#REF!	231.667	FALSE			73	60.648	158.738
696	2.70732	467.887	0.286275	0.241702	0.612016	#REF!	#REF!	#REF!	232	TRUE			73	61.634	156.064
697	2.70532	468.233	0.286275	0.237929	0.622114	#REF!	#REF!	#REF!	232.333	FALSE			73	60.672	158.639
698	2.70332	468.579	0.283689	0.232667	0.627451	#REF!	#REF!	#REF!	232.667	FALSE			72.3407	59.33	160
699	2.70132	468.927	0.282353	0.231522	0.611949	#REF!	#REF!	#REF!	233	TRUE			72	59.038	156.047
700	2.69932	469.274	0.282353	0.233855	0.603922	#REF!	#REF!	#REF!	233.333	FALSE			72	59.633	154
701	2.69732	469.622	0.282353	0.232298	0.606502	#REF!	#REF!	#REF!	233.667	FALSE			72	59.236	154.658
702	2.69531	469.971	0.287509	0.226376	0.607843	#REF!	#REF!	#REF!	234	TRUE			73.3148	57.726	155
703	2.69331	470.32	0.290196	0.231863	0.60269	#REF!	#REF!	#REF!	234.333	FALSE			74	59.125	153.686
704	2.69131	470.67	0.295344	0.235537	0.6	#REF!	#REF!	#REF!	234.667	FALSE			75.3128	60.062	153
705	2.68931	471.02	0.298039	0.233247	0.597427	#REF!	#REF!	#REF!	235	TRUE			76	59.478	152.344
706	2.68731	471.371	0.287758	0.239392	0.596078	#REF!	#REF!	#REF!	235.333	FALSE			73.3782	61.045	152
707	2.68531	471.722	0.282353	0.243137	0.59351	#REF!	#REF!	#REF!	235.667	FALSE			72	62	151.345
708	2.68331	472.074	0.279786	0.239859	0.592157	#REF!	#REF!	#REF!	236	TRUE			71.3455	61.164	151
709	2.68131	472.426	0.278431	0.2406	0.594722	#REF!	#REF!	#REF!	236.333	FALSE			71	61.353	151.654
710	2.67931	472.779	0.283557	0.239239	0.596078	#REF!	#REF!	#REF!	236.667	FALSE			72.307	61.006	152
711	2.67731	473.132	0.286275	0.238039	0.583275	#REF!	#REF!	#REF!	237	TRUE			73	60.7	148.735
712	2.67531	473.486	0.281157	0.238875	0.576471	#REF!	#REF!	#REF!	237.333	FALSE			71.695	60.913	147
713	2.6733	473.84	0.278431	0.239216	0.571357	#REF!	#REF!	#REF!	237.667	FALSE			71	61	145.696
714	2.6713	474.195	0.283542	0.237741	0.568627	#REF!	#REF!	#REF!	238	TRUE			72.3031	60.624	145
715	2.6693	474.551	0.286275	0.237051	0.576286	#REF!	#REF!	#REF!	238.333	FALSE			73	60.448	146.953
716	2.6673	474.907	0.286275	0.241043	0.580392	#REF!	#REF!	#REF!	238.667	FALSE			73	61.466	148
717	2.6653	475.263	0.286275	0.246953	0.565098	#REF!	#REF!	#REF!	239	TRUE			73	62.973	144.1
718	2.6633	475.62	0.293917	0.247773	0.556863	#REF!	#REF!	#REF!	239.333	FALSE			74.9488	63.182	142
719	2.6613	475.978	0.298039	0.244514	0.549227	#REF!	#REF!	#REF!	239.667	FALSE			76	62.351	140.053
720	2.6593	476.336	0.303126	0.243137	0.545098	#REF!	#REF!	#REF!	240	TRUE			77.2972	62	139
721	2.6573	476.695	0.305865	0.24671	0.55018	#REF!	#REF!	#REF!	240.333	FALSE			77.9956	62.911	140.296
722	2.6553	477.054	0.298148	0.251698	0.552941	#REF!	#REF!	#REF!	240.667	FALSE			76.0277	64.183	141
723	2.65329	477.414	0.294118	0.253502	0.537714	#REF!	#REF!	#REF!	241	TRUE			75	64.643	137.117
724	2.65129	477.774	0.296449	0.256133	0.529412	#REF!	#REF!	#REF!	241.333	FALSE			75.5946	65.314	135
725	2.64929	478.135	0.29762	0.255078	0.55222	#REF!	#REF!	#REF!	241.667	FALSE			75.8931	65.045	140.816
726	2.64729	478.496	0.295997	0.251255	0.564706	#REF!	#REF!	#REF!	242	TRUE			75.4792	64.07	144
727	2.64529	478.858	0.295369	0.249961	0.557114	#REF!	#REF!	#REF!	242.333	FALSE			75.3192	63.74	142.064
728	2.64329	479.221	0.298752	0.24738	0.552941	#REF!	#REF!	#REF!	242.667	FALSE			76.1818	63.082	141
729	2.64129	479.584	0.300296	0.248145	0.530204	#REF!	#REF!	#REF!	243	TRUE			76.5754	63.277	135.202
730	2.63929	479.948	0.294323	0.250835	0.517647	#REF!	#REF!	#REF!	243.333	FALSE			75.0524	63.963	132
731	2.63729	480.312	0.291235	0.252024	0.53278	#REF!	#REF!	#REF!	243.667	FALSE			74.265	64.266	135.859
732	2.63529	480.676	0.299952	0.25858	0.541176	#REF!	#REF!	#REF!	244	TRUE			76.4878	65.938	138
733	2.63328	481.042	0.304636	0.259784	0.528584	#REF!	#REF!	#REF!	244.333	FALSE			77.6823	66.245	134.789
734	2.63128	481.407	0.298715	0.254114	0.521569	#REF!	#REF!	#REF!	244.667	FALSE			76.1722	64.799	133
735	2.62928	481.774	0.29557	0.251486	0.524082	#REF!	#REF!	#REF!	245	TRUE			75.3704	64.129	133.641
736	2.62728	482.141	0.297189	0.25602	0.52549	#REF!	#REF!	#REF!	245.333	FALSE			75.7833	65.285	134
737	2.62528	482.508	0.298039	0.261275	0.52549	#REF!	#REF!	#REF!	245.667	FALSE			76	66.625	134
738	2.62328	482.876	0.303057	0.26522	0.525388	#REF!	#REF!	#REF!	246	TRUE			77.2796	67.631	133.974
739	2.62128	483.245	0.305882	0.26662	0.512647	#REF!	#REF!	#REF!	246.333	FALSE			78	67.988	130.725
740	2.61928	483.614	0.304624	0.264161	0.505431	#REF!	#REF!	#REF!	246.667	FALSE			77.6792	67.361	128.885
741	2.61728	483.984	0.30381	0.264839	0.518208	#REF!	#REF!	#REF!	247	TRUE			77.4715	67.534	132.143
742	2.61528	484.354	0.308145	0.270569	0.524404	#REF!	#REF!	#REF!	247.333	FALSE			78.577	68.995	133.723
743	2.61327	484.725	0.311078	0.273624	0.498165	#REF!	#REF!	#REF!	247.667	FALSE			79.325	69.774	127.032
744	2.61127	485.096	0.308899	0.269294	0.48418	#REF!	#REF!	#REF!	248	TRUE			78.7693	68.67	123.466
745	2.60927	485.468	0.307318	0.26462	0.482675	#REF!	#REF!	#REF!	248.333	FALSE			78.366	67.478	123.082
746	2.60727	485.841	0.321283	0.271027	0.481553	#REF!	#REF!	#REF!	248.667	FALSE			81.9271	69.112	122.796
747	2.60527	486.214	0.329647	0.27982	0.471275	#REF!	#REF!	#REF!	249	TRUE			84.06	71.354	120.175
748	2.60327	486.588	0.325345	0.279863	0.465718	#REF!	#REF!	#REF!	249.333	FALSE			82.9631	71.365	118.758
749	2.60127	486.962	0.322591	0.275945	0.469184	#REF!	#REF!	#REF!	249.667	FALSE			82.2606	70.366	119.642
750	2.59927	487.337	0.312543	0.273761	0.471396	#REF!	#REF!	#REF!	250	TRUE			79.6984	69.809	120.206
751	2.59727	487.712	0.306698	0.269882	0.458494	#REF!	#REF!	#REF!	250.333	FALSE			78.2079	68.82	116.916
752	2.59527	488.089	0.31201	0.268039	0.45138	#REF!	#REF!	#REF!	250.667	FALSE			79.5625	68.35	115.102
753	2.59327	488.465	0.314943	0.272169	0.449169	#REF!	#REF!	#REF!	251	TRUE			80.3104	69.403	114.538
754	2.59126	488.842	0.310098	0.276	0.447835	#REF!	#REF!	#REF!	251.333	FALSE			79.0751	70.38	114.198
755	2.58926	489.22	0.307088	0.274965	0.449925	#REF!	#REF!	#REF!	251.667	FALSE			78.3075	70.116	114.731
756	2.58726	489.598	0.308687	0.279051	0.45098	#REF!	#REF!	#REF!	252	TRUE			78.7153	71.158	115
757	2.58526	489.977	0.309804	0.282545	0.443561	#REF!	#REF!	#REF!	252.333	FALSE			79	72.049	113.108
758	2.58326	490.357	0.312217	0.282404	0.439216	#REF!	#REF!	#REF!	252.667	FALSE			79.6153	72.013	112
759	2.58126	490.737	0.313725	0.283518	0.438902	#REF!	#REF!	#REF!	253	TRUE			80	72.297	111.92
760	2.57926	491.118	0.313725	0.282027	0.438141	#REF!	#REF!	#REF!	253.333	FALSE			80	71.917	111.726
761	2.57726	491.499	0.313725	0.281725	0.434388	#REF!	#REF!	#REF!	253.667	FALSE			80	71.84	110.769
762	2.57526	491.881	0.311262	0.284816	0.432224	#REF!	#REF!	#REF!	254	TRUE			79.3719	72.628	110.217
763	2.57326	492.263	0.309804	0.287796	0.422443	#REF!	#REF!	#REF!	254.333	FALSE			79	73.388	107.723
764	2.57125	492.647	0.304885	0.288796	0.416239	#REF!	#REF!	#REF!	254.667	FALSE			77.7457	73.643	106.141
765	2.56925	493.03	0.301961	0.288894	0.42878	#REF!	#REF!	#REF!	255	TRUE			77	73.668	109.339
766	2.56725	493.415	0.311783	0.289745	0.436502	#REF!	#REF!	#REF!	255.333	FALSE			79.5046	73.885	111.308
767	2.56525	493.799	0.317647	0.291953	0.4252	#REF!	#REF!	#REF!	255.667	FALSE			81	74.448	108.426
768	2.56325	494.185	0.315195	0.298004	0.418592	#REF!	#REF!	#REF!	256	TRUE			80.3748	75.991	106.741
769	2.56125	494.571	0.313725	0.301616	0.410039	#REF!	#REF!	#REF!	256.333	FALSE			80	76.912	104.56
770	2.55925	494.958	0.316173	0.301961	0.404745	#REF!	#REF!	#REF!	256.667	FALSE			80.6242	77	103.21
771	2.55725	495.345	0.317647	0.301961	0.402831	#REF!	#REF!	#REF!	257	TRUE			81	77	102.722
772	2.55525	495.733	0.317647	0.301565	0.40202	#REF!	#REF!	#REF!	257.333	FALSE			81	76.899	102.515
773	2.55325	496.121	0.317647	0.299651	0.404749	#REF!	#REF!	#REF!	257.667	FALSE			81	76.411	103.211
774	2.55124	496.51	0.312767	0.300922	0.406518	#REF!	#REF!	#REF!	258	TRUE			79.7555	76.735	103.662
775	2.54924	496.9	0.309804	0.306537	0.397482	#REF!	#REF!	#REF!	258.333	FALSE			79	78.167	101.358
776	2.54724	497.29	0.314677	0.311737	0.391906	#REF!	#REF!	#REF!	258.667	FALSE			80.2426	79.493	99.936
777	2.54524	497.681	0.317647	0.311078	0.387227	#REF!	#REF!	#REF!	259	TRUE			81	79.325	98.743
778	2.54324	498.073	0.310349	0.304878	0.384314	#REF!	#REF!	#REF!	259.333	FALSE			79.1391	77.744	98
779	2.54124	498.465	0.305882	0.301925	0.384314	#REF!	#REF!	#REF!	259.667	FALSE			78	76.991	98
780	2.53924	498.858	0.320455	0.306769	0.384314	#REF!	#REF!	#REF!	260	TRUE			81.716	78.226	98
781	2.53724	499.251	0.329412	0.312231	0.381886	#REF!	#REF!	#REF!	260.333	FALSE			84	79.619	97.381
782	2.53524	499.645	0.312437	0.311302	0.380392	#REF!	#REF!	#REF!	260.667	FALSE			79.6715	79.382	97
783	2.53324	500.04	0.301961	0.312227	0.375545	#REF!	#REF!	#REF!	261	TRUE			77	79.618	95.764
784	2.53123	500.435	0.306803	0.315827	0.372549	#REF!	#REF!	#REF!	261.333	FALSE			78.2347	80.536	95
785	2.52923	500.831	0.309804	0.314616	0.36771	#REF!	#REF!	#REF!	261.667	FALSE			79	80.227	93.766
786	2.52723	501.228	0.300135	0.315	0.364706	#REF!	#REF!	#REF!	262	TRUE			76.5344	80.325	93
787	2.52523	501.625	0.294118	0.314122	0.359875	#REF!	#REF!	#REF!	262.333	FALSE			75	80.101	91.768
788	2.52323	502.023	0.313425	0.31338	0.356863	#REF!	#REF!	#REF!	262.667	FALSE			79.9234	79.912	91
789	2.52123	502.421	0.32549	0.320961	0.364098	#REF!	#REF!	#REF!	263	TRUE			83	81.845	92.845
790	2.51923	502.82	0.311033	0.327898	0.368627	#REF!	#REF!	#REF!	263.333	FALSE			79.3133	83.614	94
791	2.51723	503.22	0.301961	0.327004	0.356588	#REF!	#REF!	#REF!	263.667	FALSE			77	83.386	90.93
792	2.51523	503.62	0.304367	0.32549	0.34902	#REF!	#REF!	#REF!	264	TRUE			77.6135	83	89
793	2.51323	504.021	0.305882	0.32549	0.361039	#REF!	#REF!	#REF!	264.333	FALSE			78	83	92.065
794	2.51122	504.423	0.308284	0.32309	0.368627	#REF!	#REF!	#REF!	264.667	FALSE			78.6125	82.388	94
795	2.50922	504.825	0.309804	0.326369	0.356627	#REF!	#REF!	#REF!	265	TRUE			79	83.224	90.94
796	2.50722	505.228	0.307406	0.334573	0.34902	#REF!	#REF!	#REF!	265.333	FALSE			78.3885	85.316	89
797	2.50522	505.632	0.3059	0.340055	0.344227	#REF!	#REF!	#REF!	265.667	FALSE			78.0044	86.714	87.778
798	2.50322	506.036	0.306076	0.342392	0.341176	#REF!	#REF!	#REF!	266	TRUE			78.0495	87.31	87
799	2.50122	506.441	0.30633	0.343125	0.345961	#REF!	#REF!	#REF!	266.333	FALSE			78.1142	87.497	88.22
800	2.49922	506.846	0.310919	0.34551	0.34902	#REF!	#REF!	#REF!	266.667	FALSE			79.2843	88.105	89
801	2.49722	507.252	0.313725	0.349267	0.346631	#REF!	#REF!	#REF!	267	TRUE			80	89.063	88.391
802	2.49522	507.659	0.321322	0.349678	0.345098	#REF!	#REF!	#REF!	267.333	FALSE			81.9371	89.168	88
803	2.49322	508.066	0.325588	0.346635	0.340329	#REF!	#REF!	#REF!	267.667	FALSE			83.0249	88.392	86.784
804	2.49122	508.475	0.331084	0.347482	0.337255	#REF!	#REF!	#REF!	268	TRUE			84.4263	88.608	86
805	2.48921	508.883	0.334723	0.35378	0.334875	#REF!	#REF!	#REF!	268.333	FALSE			85.3543	90.214	85.393
806	2.48721	509.293	0.320634	0.355275	0.333333	#REF!	#REF!	#REF!	268.667	FALSE			81.7616	90.595	85
807	2.48521	509.703	0.311905	0.347016	0.330957	#REF!	#REF!	#REF!	269	TRUE			79.5359	88.489	84.394
808	2.48321	510.113	0.312112	0.348067	0.329412	#REF!	#REF!	#REF!	269.333	FALSE			79.5886	88.757	84
809	2.48121	510.525	0.312319	0.359047	0.327039	#REF!	#REF!	#REF!	269.667	FALSE			79.6413	91.557	83.395
810	2.47921	510.937	0.323462	0.365604	0.32549	#REF!	#REF!	#REF!	270	TRUE			82.4828	93.229	83
811	2.47721	511.35	0.330405	0.369349	0.320753	#REF!	#REF!	#REF!	270.333	FALSE			84.2533	94.184	81.792
812	2.47521	511.763	0.322146	0.369165	0.317647	#REF!	#REF!	#REF!	270.667	FALSE			82.1473	94.137	81
813	2.47321	512.177	0.317067	0.366012	0.317647	#REF!	#REF!	#REF!	271	TRUE			80.8521	93.333	81
814	2.47121	512.592	0.322676	0.367714	0.317647	#REF!	#REF!	#REF!	271.333	FALSE			82.2824	93.767	81
815	2.4692	513.007	0.325823	0.376329	0.322369	#REF!	#REF!	#REF!	271.667	FALSE			83.0849	95.964	82.204
816	2.4672	513.423	0.316091	0.378376	0.32549	#REF!	#REF!	#REF!	272	TRUE			80.6033	96.486	83
817	2.4652	513.84	0.310545	0.381286	0.316059	#REF!	#REF!	#REF!	272.333	FALSE			79.1889	97.228	80.595
818	2.4632	514.257	0.311934	0.386855	0.309804	#REF!	#REF!	#REF!	272.667	FALSE			79.5432	98.648	79
819	2.4612	514.675	0.312755	0.385961	0.300388	#REF!	#REF!	#REF!	273	TRUE			79.7526	98.42	76.599
820	2.4592	515.094	0.314897	0.386706	0.294231	#REF!	#REF!	#REF!	273.333	FALSE			80.2988	98.61	75.029
821	2.4572	515.514	0.316223	0.390718	0.303357	#REF!	#REF!	#REF!	273.667	FALSE			80.6369	99.633	77.356
822	2.4552	515.934	0.319465	0.394733	0.308886	#REF!	#REF!	#REF!	274	TRUE			81.4637	100.657	78.766
823	2.4532	516.355	0.321569	0.401098	0.311043	#REF!	#REF!	#REF!	274.333	FALSE			82	102.28	79.316
824	2.4512	516.776	0.325592	0.406686	0.312463	#REF!	#REF!	#REF!	274.667	FALSE			83.0259	103.705	79.678
825	2.44919	517.198	0.328401	0.406016	0.301698	#REF!	#REF!	#REF!	275	TRUE			83.7423	103.534	76.933
826	2.44719	517.621	0.330304	0.404533	0.294729	#REF!	#REF!	#REF!	275.333	FALSE			84.2275	103.156	75.156
827	2.44519	518.045	0.331725	0.406545	0.297361	#REF!	#REF!	#REF!	275.667	FALSE			84.59	103.669	75.827
828	2.44319	518.469	0.323837	0.412518	0.299745	#REF!	#REF!	#REF!	276	TRUE			82.5785	105.192	76.435
829	2.44119	518.894	0.318244	0.418557	0.309259	#REF!	#REF!	#REF!	276.333	FALSE			81.1523	106.732	78.861
830	2.43919	519.32	0.326592	0.420604	0.314604	#REF!	#REF!	#REF!	276.667	FALSE			83.2809	107.254	80.224
831	2.43719	519.746	0.332553	0.425098	0.303451	#REF!	#REF!	#REF!	277	TRUE			84.8009	108.4	77.38
832	2.43519	520.173	0.319466	0.429435	0.29649	#REF!	#REF!	#REF!	277.333	FALSE			81.4638	109.506	75.605
833	2.43319	520.601	0.310171	0.426227	0.298247	#REF!	#REF!	#REF!	277.667	FALSE			79.0937	108.688	76.053
834	2.43119	521.029	0.323631	0.425855	0.299416	#REF!	#REF!	#REF!	278	TRUE			82.5259	108.593	76.351
835	2.42918	521.459	0.333333	0.429773	0.298937	#REF!	#REF!	#REF!	278.333	FALSE			85	109.592	76.229
836	2.42718	521.889	0.326369	0.434624	0.298827	#REF!	#REF!	#REF!	278.667	FALSE			83.224	110.829	76.201
837	2.42518	522.319	0.321569	0.440612	0.299176	#REF!	#REF!	#REF!	279	TRUE			82	112.356	76.29
838	2.42318	522.75	0.335475	0.445455	0.298839	#REF!	#REF!	#REF!	279.333	FALSE			85.5461	113.591	76.204
839	2.42118	523.182	0.345098	0.445961	0.292361	#REF!	#REF!	#REF!	279.667	FALSE			88	113.72	74.552
840	2.41918	523.615	0.335842	0.445106	0.288227	#REF!	#REF!	#REF!	280	TRUE			85.6398	113.502	73.498
841	2.41718	524.049	0.329412	0.448427	0.282698	#REF!	#REF!	#REF!	280.333	FALSE			84	114.349	72.088
842	2.41518	524.483	0.324792	0.452925	0.279161	#REF!	#REF!	#REF!	280.667	FALSE			82.8219	115.496	71.186
843	2.41318	524.918	0.321569	0.455992	0.282851	#REF!	#REF!	#REF!	281	TRUE			82	116.278	72.127
844	2.41118	525.353	0.330794	0.460475	0.284776	#REF!	#REF!	#REF!	281.333	FALSE			84.3524	117.421	72.618
845	2.40918	525.79	0.337255	0.467353	0.287804	#REF!	#REF!	#REF!	281.667	FALSE			86	119.175	73.39
846	2.40717	526.227	0.33265	0.470588	0.290196	#REF!	#REF!	#REF!	282	TRUE			84.8258	120	74
847	2.40517	526.665	0.329412	0.472114	0.287882	#REF!	#REF!	#REF!	282.333	FALSE			84	120.389	73.41
848	2.40317	527.103	0.33171	0.472996	0.285965	#REF!	#REF!	#REF!	282.667	FALSE			84.5861	120.614	72.921
849	2.40117	527.542	0.333333	0.471506	0.286675	#REF!	#REF!	#REF!	283	TRUE			85	120.234	73.102
850	2.39917	527.982	0.326449	0.470588	0.287286	#REF!	#REF!	#REF!	283.333	FALSE			83.2445	120	73.258
851	2.39717	528.423	0.321569	0.472882	0.289631	#REF!	#REF!	#REF!	283.667	FALSE			82	120.585	73.856
852	2.39517	528.864	0.316987	0.4768	0.291655	#REF!	#REF!	#REF!	284	TRUE			80.8316	121.584	74.372
853	2.39317	529.307	0.313725	0.478855	0.298808	#REF!	#REF!	#REF!	284.333	FALSE			80	122.108	76.196
854	2.39117	529.75	0.325161	0.481349	0.303992	#REF!	#REF!	#REF!	284.667	FALSE			82.9161	122.744	77.518
855	2.38917	530.193	0.333333	0.487145	0.290259	#REF!	#REF!	#REF!	285	TRUE			85	124.222	74.016
856	2.38716	530.638	0.328767	0.492478	0.2806	#REF!	#REF!	#REF!	285.333	FALSE			83.8355	125.582	71.553
857	2.38516	531.083	0.32549	0.4962	0.284063	#REF!	#REF!	#REF!	285.667	FALSE			83	126.531	72.436
858	2.38316	531.529	0.32777	0.502353	0.286275	#REF!	#REF!	#REF!	286	TRUE			83.5813	128.1	73
859	2.38116	531.975	0.329412	0.512475	0.283733	#REF!	#REF!	#REF!	286.333	FALSE			84	130.681	72.352
860	2.37916	532.423	0.32486	0.515259	0.282188	#REF!	#REF!	#REF!	286.667	FALSE			82.8394	131.391	71.958
861	2.37716	532.871	0.321569	0.509176	0.286902	#REF!	#REF!	#REF!	287	TRUE			82	129.84	73.16
862	2.37516	533.32	0.32384	0.510267	0.290196	#REF!	#REF!	#REF!	287.333	FALSE			82.5793	130.118	74
863	2.37316	533.77	0.32549	0.515533	0.290196	#REF!	#REF!	#REF!	287.667	FALSE			83	131.461	74
864	2.37116	534.22	0.332294	0.513024	0.290196	#REF!	#REF!	#REF!	288	TRUE			84.735	130.821	74
865	2.36916	534.671	0.337255	0.514761	0.290196	#REF!	#REF!	#REF!	288.333	FALSE			86	131.264	74
866	2.36715	535.123	0.337255	0.522694	0.290196	#REF!	#REF!	#REF!	288.667	FALSE			86	133.287	74
867	2.36515	535.576	0.337255	0.524196	0.290196	#REF!	#REF!	#REF!	289	TRUE			86	133.67	74
868	2.36315	536.029	0.330474	0.532243	0.290196	#REF!	#REF!	#REF!	289.333	FALSE			84.2709	135.722	74
869	2.36115	536.484	0.32549	0.541016	0.290196	#REF!	#REF!	#REF!	289.667	FALSE			83	137.959	74
870	2.35915	536.939	0.327747	0.542914	0.290196	#REF!	#REF!	#REF!	290	TRUE			83.5754	138.443	74
871	2.35715	537.395	0.329412	0.545357	0.287941	#REF!	#REF!	#REF!	290.333	FALSE			84	139.066	73.425
872	2.35515	537.851	0.33617	0.545208	0.286275	#REF!	#REF!	#REF!	290.667	FALSE			85.7233	139.028	73
873	2.35315	538.309	0.341119	0.546161	0.288525	#REF!	#REF!	#REF!	291	TRUE			86.9854	139.271	73.574
874	2.35115	538.767	0.336718	0.548471	0.290196	#REF!	#REF!	#REF!	291.333	FALSE			85.863	139.86	74
875	2.34915	539.226	0.333804	0.552059	0.292443	#REF!	#REF!	#REF!	291.667	FALSE			85.1201	140.775	74.573
876	2.34714	539.685	0.334011	0.558063	0.294118	#REF!	#REF!	#REF!	292	TRUE			85.1728	142.306	75
877	2.34514	540.146	0.334218	0.560784	0.296361	#REF!	#REF!	#REF!	292.333	FALSE			85.2255	143	75.572
878	2.34314	540.607	0.335418	0.568459	0.298039	#REF!	#REF!	#REF!	292.667	FALSE			85.5317	144.957	76
879	2.34114	541.069	0.335957	0.57431	0.286843	#REF!	#REF!	#REF!	293	TRUE			85.6691	146.449	73.145
880	2.33914	541.532	0.333422	0.577588	0.278431	#REF!	#REF!	#REF!	293.333	FALSE			85.0225	147.285	71
881	2.33714	541.996	0.331978	0.580365	0.289608	#REF!	#REF!	#REF!	293.667	FALSE			84.6545	147.993	73.85
882	2.33514	542.46	0.336258	0.57618	0.298039	#REF!	#REF!	#REF!	294	TRUE			85.7459	146.926	76
883	2.33314	542.925	0.339052	0.57738	0.306965	#REF!	#REF!	#REF!	294.333	FALSE			86.4583	147.232	78.276
884	2.33114	543.391	0.33547	0.585094	0.313725	#REF!	#REF!	#REF!	294.667	FALSE			85.5448	149.199	80
885	2.32914	543.858	0.333218	0.597145	0.307043	#REF!	#REF!	#REF!	295	TRUE			84.9707	152.272	78.296
886	2.32714	544.326	0.33097	0.606149	0.301961	#REF!	#REF!	#REF!	295.333	FALSE			84.3974	154.568	77
887	2.32513	544.794	0.328401	0.604184	0.299737	#REF!	#REF!	#REF!	295.667	FALSE			83.7423	154.067	76.433
888	2.32313	545.263	0.334938	0.599075	0.298039	#REF!	#REF!	#REF!	296	TRUE			85.4093	152.764	76
889	2.32113	545.733	0.34062	0.597278	0.302478	#REF!	#REF!	#REF!	296.333	FALSE			86.858	152.306	77.132
890	2.31913	546.204	0.339816	0.60162	0.305882	#REF!	#REF!	#REF!	296.667	FALSE			86.6531	153.413	78
891	2.31713	546.676	0.339144	0.604933	0.303667	#REF!	#REF!	#REF!	297	TRUE			86.4817	154.258	77.435
892	2.31513	547.148	0.33914	0.603655	0.301961	#REF!	#REF!	#REF!	297.333	FALSE			86.4808	153.932	77
893	2.31313	547.622	0.338541	0.601996	0.310812	#REF!	#REF!	#REF!	297.667	FALSE			86.328	153.509	79.257
894	2.31113	548.096	0.330422	0.603251	0.317647	#REF!	#REF!	#REF!	298	TRUE			84.2575	153.829	81
895	2.30913	548.571	0.324124	0.611176	0.319855	#REF!	#REF!	#REF!	298.333	FALSE			82.6515	155.85	81.563
896	2.30713	549.047	0.328977	0.618125	0.321569	#REF!	#REF!	#REF!	298.667	FALSE			83.8891	157.622	82
897	2.30512	549.523	0.332553	0.619608	0.317161	#REF!	#REF!	#REF!	299	TRUE			84.8009	158	80.876
898	2.30312	550.001	0.334229	0.617024	0.313725	#REF!	#REF!	#REF!	299.333	FALSE			85.2284	157.341	80
899	2.30112	550.479	0.336353	0.617396	0.318125	#REF!	#REF!	#REF!	299.667	FALSE			85.7701	157.436	81.122
900	2.29912	550.958	0.332642	0.626075	0.321569	#REF!	#REF!	#REF!	300	TRUE			84.8238	159.649	82
901	2.29712	551.438	0.329412	0.629176	0.323765	#REF!	#REF!	#REF!	300.333	FALSE			84	160.44	82.56
902	2.29512	551.919	0.33719	0.62302	0.325573	#REF!	#REF!	#REF!	300.667	FALSE			85.9834	158.87	83.021
903	2.29312	552.4	0.343513	0.621663	0.330075	#REF!	#REF!	#REF!	301	TRUE			87.5959	158.524	84.169
904	2.29112	552.883	0.335724	0.621106	0.333569	#REF!	#REF!	#REF!	301.333	FALSE			85.6097	158.382	85.06
905	2.28912	553.366	0.329412	0.617639	0.338043	#REF!	#REF!	#REF!	301.667	FALSE			84	157.498	86.201
906	2.28712	553.85	0.325575	0.62091	0.3416	#REF!	#REF!	#REF!	302	TRUE			83.0215	158.332	87.108
907	2.28511	554.335	0.322327	0.623702	0.334851	#REF!	#REF!	#REF!	302.333	FALSE			82.1933	159.044	85.387
908	2.28311	554.821	0.328671	0.625098	0.329412	#REF!	#REF!	#REF!	302.667	FALSE			83.8111	159.4	84
909	2.28111	555.308	0.333678	0.631894	0.33338	#REF!	#REF!	#REF!	303	TRUE			85.0878	161.133	85.012
910	2.27911	555.795	0.328996	0.633922	0.336447	#REF!	#REF!	#REF!	303.333	FALSE			83.8941	161.65	85.794
911	2.27711	556.284	0.32549	0.633624	0.335004	#REF!	#REF!	#REF!	303.667	FALSE			83	161.574	85.426
912	2.27511	556.773	0.332018	0.635843	0.334408	#REF!	#REF!	#REF!	304	TRUE			84.6647	162.14	85.274
913	2.27311	557.263	0.337255	0.633082	0.3408	#REF!	#REF!	#REF!	304.333	FALSE			86	161.436	86.904
914	2.27111	557.754	0.324221	0.625839	0.345937	#REF!	#REF!	#REF!	304.667	FALSE			82.6764	159.589	88.214
915	2.26911	558.246	0.313725	0.622957	0.347102	#REF!	#REF!	#REF!	305	TRUE			80	158.854	88.511
916	2.26711	558.739	0.315894	0.627867	0.347639	#REF!	#REF!	#REF!	305.333	FALSE			80.553	160.106	88.648
917	2.2651	559.232	0.317647	0.628925	0.351059	#REF!	#REF!	#REF!	305.667	FALSE			81	160.376	89.52
918	2.2631	559.727	0.317647	0.626651	0.353718	#REF!	#REF!	#REF!	306	TRUE			81	159.796	90.198
919	2.2611	560.222	0.317647	0.627565	0.360933	#REF!	#REF!	#REF!	306.333	FALSE			81	160.029	92.038
920	2.2591	560.718	0.315486	0.633145	0.366863	#REF!	#REF!	#REF!	306.667	FALSE			80.449	161.452	93.55
921	2.2571	561.215	0.313725	0.637176	0.362451	#REF!	#REF!	#REF!	307	TRUE			80	162.48	92.425
922	2.2551	561.713	0.307255	0.637259	0.358827	#REF!	#REF!	#REF!	307.333	FALSE			78.3499	162.501	91.501
923	2.2531	562.212	0.301961	0.638392	0.365298	#REF!	#REF!	#REF!	307.667	FALSE			77	162.79	93.151
924	2.2511	562.712	0.312726	0.640769	0.370776	#REF!	#REF!	#REF!	308	TRUE			79.7452	163.396	94.548
925	2.2491	563.212	0.321569	0.645706	0.375784	#REF!	#REF!	#REF!	308.333	FALSE			82	164.655	95.825
926	2.2471	563.714	0.31727	0.652075	0.379635	#REF!	#REF!	#REF!	308.667	FALSE			80.9039	166.279	96.807
927	2.2451	564.216	0.313725	0.652235	0.380482	#REF!	#REF!	#REF!	309	TRUE			80	166.32	97.023
928	2.24309	564.72	0.302998	0.646933	0.381529	#REF!	#REF!	#REF!	309.333	FALSE			77.2645	164.968	97.29
929	2.24109	565.224	0.294118	0.648012	0.380996	#REF!	#REF!	#REF!	309.667	FALSE			75	165.243	97.154
930	2.23909	565.729	0.300543	0.653122	0.380392	#REF!	#REF!	#REF!	310	TRUE			76.6384	166.546	97
931	2.23709	566.235	0.305882	0.657976	0.389886	#REF!	#REF!	#REF!	310.333	FALSE			78	167.784	99.421
932	2.23509	566.742	0.303745	0.658588	0.397984	#REF!	#REF!	#REF!	310.667	FALSE			77.4549	167.94	101.486
933	2.23309	567.25	0.301961	0.659133	0.393259	#REF!	#REF!	#REF!	311	TRUE			77	168.079	100.281
934	2.23109	567.759	0.299827	0.66538	0.389051	#REF!	#REF!	#REF!	311.333	FALSE			76.4558	169.672	99.208
935	2.22909	568.268	0.298039	0.662749	0.399396	#REF!	#REF!	#REF!	311.667	FALSE			76	169.001	101.846
936	2.22709	568.779	0.295909	0.655443	0.408635	#REF!	#REF!	#REF!	312	TRUE			75.4568	167.138	104.202
937	2.22509	569.29	0.294118	0.65131	0.413659	#REF!	#REF!	#REF!	312.333	FALSE			75	166.084	105.483
938	2.22308	569.803	0.296244	0.653051	0.417871	#REF!	#REF!	#REF!	312.667	FALSE			75.5422	166.528	106.557
939	2.22108	570.316	0.298039	0.665776	0.415945	#REF!	#REF!	#REF!	313	TRUE			76	169.773	106.066
940	2.21908	570.83	0.289549	0.678137	0.414471	#REF!	#REF!	#REF!	313.333	FALSE			73.835	172.925	105.69
941	2.21708	571.345	0.282353	0.679871	0.423592	#REF!	#REF!	#REF!	313.667	FALSE			72	173.367	108.016
942	2.21508	571.862	0.288709	0.684655	0.431216	#REF!	#REF!	#REF!	314	TRUE			73.6208	174.587	109.96
943	2.21308	572.379	0.294118	0.68378	0.431373	#REF!	#REF!	#REF!	314.333	FALSE			75	174.364	110
944	2.21108	572.897	0.285658	0.66802	0.431373	#REF!	#REF!	#REF!	314.667	FALSE			72.8428	170.345	110
945	2.20908	573.416	0.278431	0.665996	0.429259	#REF!	#REF!	#REF!	315	TRUE			71	169.829	109.461
946	2.20708	573.935	0.27632	0.6756	0.427451	#REF!	#REF!	#REF!	315.333	FALSE			70.4617	172.278	109
947	2.20508	574.456	0.27451	0.676749	0.446431	#REF!	#REF!	#REF!	315.667	FALSE			70	172.571	113.84
948	2.20307	574.978	0.280831	0.679525	0.462745	#REF!	#REF!	#REF!	316	TRUE			71.612	173.279	118
949	2.20107	575.501	0.286315	0.685694	0.460639	#REF!	#REF!	#REF!	316.333	FALSE			73.0102	174.852	117.463
950	2.19907	576.024	0.282519	0.686365	0.458824	#REF!	#REF!	#REF!	316.667	FALSE			72.0424	175.023	117
951	2.19707	576.549	0.279666	0.685592	0.463027	#REF!	#REF!	#REF!	317	TRUE			71.3148	174.826	118.072
952	2.19507	577.075	0.285544	0.684522	0.466667	#REF!	#REF!	#REF!	317.333	FALSE			72.8136	174.553	119
953	2.19307	577.601	0.290196	0.681792	0.468765	#REF!	#REF!	#REF!	317.667	FALSE			74	173.857	119.535
954	2.19107	578.129	0.293792	0.685741	0.470588	#REF!	#REF!	#REF!	318	TRUE			74.917	174.864	120
955	2.18907	578.657	0.296719	0.690196	0.481059	#REF!	#REF!	#REF!	318.333	FALSE			75.6633	176	122.67
956	2.18707	579.186	0.292328	0.696471	0.490196	#REF!	#REF!	#REF!	318.667	FALSE			74.5437	177.6	125
957	2.18507	579.717	0.288462	0.713149	0.490196	#REF!	#REF!	#REF!	319	TRUE			73.5578	181.853	125
958	2.18306	580.248	0.280915	0.719933	0.490196	#REF!	#REF!	#REF!	319.333	FALSE			71.6333	183.583	125
959	2.18106	580.781	0.274883	0.712259	0.492282	#REF!	#REF!	#REF!	319.667	FALSE			70.0952	181.626	125.532
960	2.17906	581.314	0.282797	0.707792	0.494118	#REF!	#REF!	#REF!	320	TRUE			72.1133	180.487	126
961	2.17706	581.848	0.288996	0.709729	0.500365	#REF!	#REF!	#REF!	320.333	FALSE			73.694	180.981	127.593
962	2.17506	582.383	0.285278	0.712443	0.505882	#REF!	#REF!	#REF!	320.667	FALSE			72.7458	181.673	129
963	2.17306	582.92	0.282353	0.715788	0.514196	#REF!	#REF!	#REF!	321	TRUE			72	182.526	131.12
964	2.17106	583.457	0.279492	0.71702	0.521569	#REF!	#REF!	#REF!	321.333	FALSE			71.2704	182.84	133
965	2.16906	583.995	0.277364	0.7204	0.523643	#REF!	#REF!	#REF!	321.667	FALSE			70.7277	183.702	133.529
966	2.16706	584.534	0.283649	0.722894	0.52549	#REF!	#REF!	#REF!	322	TRUE			72.3305	184.338	134
967	2.16506	585.075	0.289714	0.720733	0.52549	#REF!	#REF!	#REF!	322.333	FALSE			73.877	183.787	134
968	2.16306	585.616	0.292518	0.725004	0.52549	#REF!	#REF!	#REF!	322.667	FALSE			74.5922	184.876	134
969	2.16105	586.158	0.294703	0.733545	0.533757	#REF!	#REF!	#REF!	323	TRUE			75.1493	187.054	136.108
970	2.15905	586.701	0.291362	0.740043	0.541176	#REF!	#REF!	#REF!	323.333	FALSE			74.2972	188.711	138
971	2.15705	587.246	0.287882	0.736839	0.55562	#REF!	#REF!	#REF!	323.667	FALSE			73.41	187.894	141.683
972	2.15505	587.791	0.292861	0.734384	0.568627	#REF!	#REF!	#REF!	324	TRUE			74.6796	187.268	145
973	2.15305	588.337	0.297758	0.739208	0.574804	#REF!	#REF!	#REF!	324.333	FALSE			75.9283	188.498	146.575
974	2.15105	588.884	0.292546	0.74351	0.580392	#REF!	#REF!	#REF!	324.667	FALSE			74.5993	189.595	148
975	2.14905	589.433	0.28713	0.752353	0.592725	#REF!	#REF!	#REF!	325	TRUE			73.2182	191.85	151.145
976	2.14705	589.982	0.292985	0.761055	0.603922	#REF!	#REF!	#REF!	325.333	FALSE			74.7113	194.069	154
977	2.14505	590.532	0.298998	0.767561	0.605973	#REF!	#REF!	#REF!	325.667	FALSE			76.2445	195.728	154.523
978	2.14305	591.084	0.29547	0.769718	0.607843	#REF!	#REF!	#REF!	326	TRUE			75.3448	196.278	155
979	2.14104	591.636	0.291758	0.767969	0.616035	#REF!	#REF!	#REF!	326.333	FALSE			74.3982	195.832	157.089
980	2.13904	592.19	0.294304	0.766082	0.623529	#REF!	#REF!	#REF!	326.667	FALSE			75.0475	195.351	159
981	2.13704	592.744	0.296415	0.76651	0.621486	#REF!	#REF!	#REF!	327	TRUE			75.5857	195.46	158.479
982	2.13504	593.3	0.296817	0.776498	0.619608	#REF!	#REF!	#REF!	327.333	FALSE			75.6884	198.007	158
983	2.13304	593.856	0.297672	0.786231	0.637969	#REF!	#REF!	#REF!	327.667	FALSE			75.9063	200.489	162.682
984	2.13104	594.414	0.2956	0.788235	0.655176	#REF!	#REF!	#REF!	328	TRUE			75.3779	201	167.07
985	2.12904	594.973	0.293796	0.796161	0.667529	#REF!	#REF!	#REF!	328.333	FALSE			74.918	203.021	170.22
986	2.12704	595.532	0.298012	0.803208	0.678431	#REF!	#REF!	#REF!	328.667	FALSE			75.9931	204.818	173
987	2.12504	596.093	0.301961	0.801408	0.684702	#REF!	#REF!	#REF!	329	TRUE			77	204.359	174.599
988	2.12304	596.655	0.306022	0.804063	0.690624	#REF!	#REF!	#REF!	329.333	FALSE			78.0356	205.036	176.109
989	2.12103	597.218	0.309804	0.802298	0.694376	#REF!	#REF!	#REF!	329.667	FALSE			79	204.586	177.066
990	2.11903	597.782	0.311831	0.799345	0.698459	#REF!	#REF!	#REF!	330	TRUE			79.5168	203.833	178.107
991	2.11703	598.347	0.313725	0.809529	0.710345	#REF!	#REF!	#REF!	330.333	FALSE			80	206.43	181.138
992	2.11503	598.913	0.305634	0.811239	0.720757	#REF!	#REF!	#REF!	330.667	FALSE			77.9366	206.866	183.793
993	2.11303	599.48	0.298039	0.801376	0.722835	#REF!	#REF!	#REF!	331	TRUE			76	204.351	184.323
994	2.11103	600.048	0.302078	0.801031	0.724396	#REF!	#REF!	#REF!	331.333	FALSE			77.0298	204.263	184.721
995	2.10903	600.617	0.305882	0.807373	0.735137	#REF!	#REF!	#REF!	331.667	FALSE			78	205.88	187.46
996	2.10703	601.188	0.307898	0.80962	0.745435	#REF!	#REF!	#REF!	332	TRUE			78.5139	206.453	190.086
997	2.10503	601.759	0.309804	0.807808	0.745176	#REF!	#REF!	#REF!	332.333	FALSE			79	205.991	190.02
998	2.10303	602.332	0.305781	0.806459	0.744627	#REF!	#REF!	#REF!	332.667	FALSE			77.9741	205.647	189.88
999	2.10102	602.906	0.301961	0.805604	0.748341	#REF!	#REF!	#REF!	333	TRUE			77	205.429	190.827
1000	2.09902	603.48	0.301961	0.800675	0.752133	#REF!	#REF!	#REF!	333.333	FALSE			77	204.172	191.794
1001	2.09702	604.056	0.301961	0.793792	0.762463	#REF!	#REF!	#REF!	333.667	FALSE			77	202.417	194.428
1002	2.09502	604.633	0.303965	0.796784	0.771933	#REF!	#REF!	#REF!	334	TRUE			77.511	203.18	196.843
1003	2.09302	605.211	0.305882	0.796145	0.765161	#REF!	#REF!	#REF!	334.333	FALSE			78	203.017	195.116
1004	2.09102	605.79	0.313882	0.784196	0.758827	#REF!	#REF!	#REF!	334.667	FALSE			80.04	199.97	193.501
1005	2.08902	606.371	0.321569	0.781286	0.767196	#REF!	#REF!	#REF!	335	TRUE			82	199.228	195.635
1006	2.08702	606.952	0.317576	0.783933	0.774949	#REF!	#REF!	#REF!	335.333	FALSE			80.9819	199.903	197.612
1007	2.08502	607.534	0.313725	0.781455	0.78189	#REF!	#REF!	#REF!	335.667	FALSE			80	199.271	199.382
1008	2.08302	608.118	0.305756	0.772886	0.789051	#REF!	#REF!	#REF!	336	TRUE			77.9678	197.086	201.208
1009	2.08102	608.703	0.298039	0.767957	0.785369	#REF!	#REF!	#REF!	336.333	FALSE			76	195.829	200.269
1010	2.07901	609.289	0.307982	0.770859	0.780451	#REF!	#REF!	#REF!	336.667	FALSE			78.5354	196.569	199.015
1011	2.07701	609.876	0.317647	0.769816	0.796749	#REF!	#REF!	#REF!	337	TRUE			81	196.303	203.171
1012	2.07501	610.464	0.311693	0.762463	0.813157	#REF!	#REF!	#REF!	337.333	FALSE			79.4817	194.428	207.355
1013	2.07301	611.053	0.305882	0.756467	0.807898	#REF!	#REF!	#REF!	337.667	FALSE			78	192.899	206.014
1014	2.07101	611.643	0.303902	0.756933	0.803114	#REF!	#REF!	#REF!	338	TRUE			77.4949	193.018	204.794
1015	2.06901	612.235	0.301961	0.756847	0.811247	#REF!	#REF!	#REF!	338.333	FALSE			77	192.996	206.868
1016	2.06701	612.827	0.299984	0.749714	0.820275	#REF!	#REF!	#REF!	338.667	FALSE			76.4958	191.177	209.17
1017	2.06501	613.421	0.298039	0.745467	0.816733	#REF!	#REF!	#REF!	339	TRUE			76	190.094	208.267
1018	2.06301	614.016	0.300013	0.74271	0.812196	#REF!	#REF!	#REF!	339.333	FALSE			76.5032	189.391	207.11
1019	2.06101	614.612	0.301961	0.740275	0.824918	#REF!	#REF!	#REF!	339.667	FALSE			77	188.77	210.354
1020	2.059	615.21	0.294083	0.741608	0.838353	#REF!	#REF!	#REF!	340	TRUE			74.9912	189.11	213.78
1021	2.057	615.808	0.286275	0.741345	0.843824	#REF!	#REF!	#REF!	340.333	FALSE			73	189.043	215.175
1022	2.055	616.408	0.290205	0.737365	0.848494	#REF!	#REF!	#REF!	340.667	FALSE			74.0024	188.028	216.366
1023	2.053	617.009	0.294118	0.729333	0.839776	#REF!	#REF!	#REF!	341	TRUE			75	185.98	214.143
1024	2.051	617.611	0.284309	0.723431	0.831467	#REF!	#REF!	#REF!	341.333	FALSE			72.4988	184.475	212.024
1025	2.049	618.214	0.274613	0.715667	0.843133	#REF!	#REF!	#REF!	341.667	FALSE			70.0264	182.495	214.999
1026	2.047	618.818	0.276855	0.713576	0.854902	#REF!	#REF!	#REF!	342	TRUE			70.5981	181.962	218
1027	2.045	619.423	0.279207	0.713255	0.854902	#REF!	#REF!	#REF!	342.333	FALSE			71.1977	181.88	218
1028	2.043	620.03	0.28111	0.705894	0.854902	#REF!	#REF!	#REF!	342.667	FALSE			71.6831	180.003	218
1029	2.041	620.638	0.282818	0.704561	0.852949	#REF!	#REF!	#REF!	343	TRUE			72.1186	179.663	217.502
1030	2.03899	621.247	0.275403	0.704459	0.85098	#REF!	#REF!	#REF!	343.333	FALSE			70.2278	179.637	217
1031	2.03699	621.857	0.26801	0.696737	0.856824	#REF!	#REF!	#REF!	343.667	FALSE			68.3426	177.668	218.49
1032	2.03499	622.469	0.270956	0.694451	0.862745	#REF!	#REF!	#REF!	344	TRUE			69.0937	177.085	220
1033	2.03299	623.082	0.273631	0.699984	0.874412	#REF!	#REF!	#REF!	344.333	FALSE			69.776	178.496	222.975
1034	2.03099	623.695	0.276927	0.70002	0.886275	#REF!	#REF!	#REF!	344.667	FALSE			70.6163	178.505	226
1035	2.02899	624.31	0.280183	0.694157	0.895976	#REF!	#REF!	#REF!	345	TRUE			71.4466	177.01	228.474
1036	2.02699	624.927	0.270106	0.689651	0.905882	#REF!	#REF!	#REF!	345.333	FALSE			68.877	175.861	231
1037	2.02499	625.544	0.260115	0.690937	0.900071	#REF!	#REF!	#REF!	345.667	FALSE			66.3294	176.189	229.518
1038	2.02299	626.163	0.264647	0.690867	0.894118	#REF!	#REF!	#REF!	346	TRUE			67.4849	176.171	228
1039	2.02099	626.783	0.26909	0.690984	0.905718	#REF!	#REF!	#REF!	346.333	FALSE			68.6179	176.201	230.958
1040	2.01898	627.404	0.274344	0.691231	0.917647	#REF!	#REF!	#REF!	346.667	FALSE			69.9578	176.264	234
1041	2.01698	628.027	0.279453	0.687502	0.915718	#REF!	#REF!	#REF!	347	TRUE			71.2606	175.313	233.508
1042	2.01498	628.65	0.271032	0.681847	0.913725	#REF!	#REF!	#REF!	347.333	FALSE			69.1131	173.871	233
1043	2.01298	629.275	0.262745	0.670349	0.921427	#REF!	#REF!	#REF!	347.667	FALSE			67	170.939	234.964
1044	2.01098	629.901	0.264722	0.664478	0.929412	#REF!	#REF!	#REF!	348	TRUE			67.5041	169.442	237
1045	2.00898	630.529	0.266982	0.674353	0.946706	#REF!	#REF!	#REF!	348.333	FALSE			68.0805	171.96	241.41
1046	2.00698	631.157	0.265269	0.678424	0.964706	#REF!	#REF!	#REF!	348.667	FALSE			67.6437	172.998	246
1047	2.00498	631.787	0.263474	0.671824	0.966624	#REF!	#REF!	#REF!	349	TRUE			67.1859	171.315	246.489
1048	2.00298	632.418	0.264682	0.67138	0.968627	#REF!	#REF!	#REF!	349.333	FALSE			67.494	171.202	247
1049	2.00098	633.051	0.265524	0.673702	0.960973	#REF!	#REF!	#REF!	349.667	FALSE			67.7086	171.794	245.048
1050	1.99898	633.684	0.266006	0.671141	0.952941	#REF!	#REF!	#REF!	350	TRUE			67.8315	171.141	243
1051	1.99697	634.319	0.26704	0.661647	0.968224	#REF!	#REF!	#REF!	350.333	FALSE			68.0952	168.72	246.897
1052	1.99497	634.956	0.265302	0.652992	0.984314	#REF!	#REF!	#REF!	350.667	FALSE			67.652	166.513	251
1053	1.99297	635.593	0.262728	0.6504	0.978596	#REF!	#REF!	#REF!	351	TRUE			66.9956	165.852	249.542
1054	1.99097	636.232	0.265908	0.654529	0.972549	#REF!	#REF!	#REF!	351.333	FALSE			67.8066	166.905	248
1055	1.98897	636.872	0.269819	0.665443	0.974451	#REF!	#REF!	#REF!	351.667	FALSE			68.8038	169.688	248.485
1056	1.98697	637.513	0.268022	0.667847	0.976471	#REF!	#REF!	#REF!	352	TRUE			68.3455	170.301	249
1057	1.98497	638.156	0.266104	0.657863	0.987863	#REF!	#REF!	#REF!	352.333	FALSE			67.8565	167.755	251.905
1058	1.98297	638.8	0.267438	0.650659	1	#REF!	#REF!	#REF!	352.667	FALSE			68.1966	165.918	255
1059	1.98097	639.445	0.269164	0.655424	1	#REF!	#REF!	#REF!	353	TRUE			68.6369	167.133	255
1060	1.97897	640.092	0.271593	0.657537	1	#REF!	#REF!	#REF!	353.333	FALSE			69.2561	167.672	255
1061	1.97696	640.74	0.274062	0.643035	1	#REF!	#REF!	#REF!	353.667	FALSE			69.8858	163.974	255
1062	1.97496	641.389	0.270705	0.631569	1	#REF!	#REF!	#REF!	354	TRUE			69.0297	161.05	255
1063	1.97296	642.039	0.266667	0.632784	1	#REF!	#REF!	#REF!	354.333	FALSE			68	161.36	255
1064	1.97096	642.691	0.264782	0.629561	1	#REF!	#REF!	#REF!	354.667	FALSE			67.5193	160.538	255
1065	1.96896	643.344	0.262745	0.625459	1	#REF!	#REF!	#REF!	355	TRUE			67	159.492	255
1066	1.96696	643.999	0.268389	0.6274	1	#REF!	#REF!	#REF!	355.333	FALSE			68.4392	159.987	255
1067	1.96496	644.655	0.27451	0.627306	1	#REF!	#REF!	#REF!	355.667	FALSE			70	159.963	255
1068	1.96296	645.312	0.278265	0.632843	1	#REF!	#REF!	#REF!	356	TRUE			70.9575	161.375	255
1069	1.96096	645.97	0.282353	0.633737	1	#REF!	#REF!	#REF!	356.333	FALSE			72	161.603	255
1070	1.95896	646.63	0.271111	0.624361	1	#REF!	#REF!	#REF!	356.667	FALSE			69.1332	159.212	255
1071	1.95695	647.291	0.258824	0.614773	1	#REF!	#REF!	#REF!	357	TRUE			66	156.767	255
1072	1.95495	647.954	0.268173	0.611259	1	#REF!	#REF!	#REF!	357.333	FALSE			68.3841	155.871	255
1073	1.95295	648.618	0.278431	0.618157	1	#REF!	#REF!	#REF!	357.667	FALSE			71	157.63	255
1074	1.95095	649.283	0.272833	0.61898	1	#REF!	#REF!	#REF!	358	TRUE			69.5725	157.84	255
1075	1.94895	649.949	0.266667	0.611478	1	#REF!	#REF!	#REF!	358.333	FALSE			68	155.927	255
1076	1.94695	650.617	0.266667	0.607365	1	#REF!	#REF!	#REF!	358.667	FALSE			68	154.878	255
1077	1.94495	651.287	0.266667	0.608078	1	#REF!	#REF!	#REF!	359	TRUE			68	155.06	255
1078	1.94295	651.958	0.268525	0.60751	1	#REF!	#REF!	#REF!	359.333	FALSE			68.4739	154.915	255
1079	1.94095	652.63	0.270588	0.604012	1	#REF!	#REF!	#REF!	359.667	FALSE			69	154.023	255
1080	1.93895	653.303	0.268734	0.608094	1	#REF!	#REF!	#REF!	360	TRUE			68.5271	155.064	255
1081	1.93694	653.978	0.266667	0.611647	1	#REF!	#REF!	#REF!	360.333	FALSE			68	155.97	255
1082	1.93494	654.654	0.27592	0.606753	1	#REF!	#REF!	#REF!	360.667	FALSE			70.3597	154.722	255
1083	1.93294	655.332	0.286275	0.60449	1	#REF!	#REF!	#REF!	361	TRUE			73	154.145	255
1084	1.93094	656.011	0.282581	0.595063	1	#REF!	#REF!	#REF!	361.333	FALSE			72.0581	151.741	255
1085	1.92894	656.692	0.278431	0.578788	1	#REF!	#REF!	#REF!	361.667	FALSE			71	147.591	255
1086	1.92694	657.374	0.274745	0.568867	1	#REF!	#REF!	#REF!	362	TRUE			70.06	145.061	255
1087	1.92494	658.057	0.270588	0.564718	1	#REF!	#REF!	#REF!	362.333	FALSE			69	144.003	255
1088	1.92294	658.742	0.268749	0.567169	1	#REF!	#REF!	#REF!	362.667	FALSE			68.531	144.628	255
1089	1.92094	659.428	0.266667	0.571353	1	#REF!	#REF!	#REF!	363	TRUE			68	145.695	255
1090	1.91894	660.116	0.274008	0.569616	1	#REF!	#REF!	#REF!	363.333	FALSE			69.8721	145.252	255
1091	1.91694	660.805	0.282353	0.564353	1	#REF!	#REF!	#REF!	363.667	FALSE			72	143.91	255
1092	1.91493	661.495	0.284185	0.560337	1	#REF!	#REF!	#REF!	364	TRUE			72.4671	142.886	255
1093	1.91293	662.187	0.286275	0.555722	1	#REF!	#REF!	#REF!	364.333	FALSE			73	141.709	255
1094	1.91093	662.88	0.284447	0.551114	1	#REF!	#REF!	#REF!	364.667	FALSE			72.5339	140.534	255
1095	1.90893	663.575	0.282353	0.550553	1	#REF!	#REF!	#REF!	365	TRUE			72	140.391	255
1096	1.90693	664.272	0.284177	0.552024	1	#REF!	#REF!	#REF!	365.333	FALSE			72.4651	140.766	255
1097	1.90493	664.969	0.286275	0.552294	1	#REF!	#REF!	#REF!	365.667	FALSE			73	140.835	255
1098	1.90293	665.669	0.286275	0.551498	1	#REF!	#REF!	#REF!	366	TRUE			73	140.632	255
1099	1.90093	666.369	0.286275	0.547914	1	#REF!	#REF!	#REF!	366.333	FALSE			73	139.718	255
1100	1.89893	667.071	0.286275	0.545718	1	#REF!	#REF!	#REF!	366.667	FALSE			73	139.158	255
1101	1.89693	667.775	0.286085	0.539937	1	#REF!	#REF!	#REF!	367	TRUE			72.9517	137.684	255
1102	1.89492	668.48	0.284347	0.524271	1	#REF!	#REF!	#REF!	367.333	FALSE			72.5086	133.689	255
1103	1.89292	669.187	0.282893	0.515843	1	#REF!	#REF!	#REF!	367.667	FALSE			72.1376	131.54	255
1104	1.89092	669.895	0.284564	0.521733	1	#REF!	#REF!	#REF!	368	TRUE			72.5638	133.042	255
1105	1.88892	670.605	0.286275	0.528996	1	#REF!	#REF!	#REF!	368.333	FALSE			73	134.894	255
1106	1.88692	671.316	0.287012	0.529569	1	#REF!	#REF!	#REF!	368.667	FALSE			73.188	135.04	255
1107	1.88492	672.028	0.287463	0.520082	1	#REF!	#REF!	#REF!	369	TRUE			73.3031	132.621	255
1108	1.88292	672.743	0.291741	0.513588	1	#REF!	#REF!	#REF!	369.333	FALSE			74.3939	130.965	255
1109	1.88092	673.458	0.297678	0.513239	1	#REF!	#REF!	#REF!	369.667	FALSE			75.9078	130.876	255
1110	1.87892	674.176	0.291765	0.513047	1	#REF!	#REF!	#REF!	370	TRUE			74.4002	130.827	255
1111	1.87692	674.894	0.284081	0.507471	1	#REF!	#REF!	#REF!	370.333	FALSE			72.4407	129.405	255
1112	1.87491	675.615	0.288412	0.499106	1	#REF!	#REF!	#REF!	370.667	FALSE			73.545	127.272	255
1113	1.87291	676.336	0.294106	0.494996	1	#REF!	#REF!	#REF!	371	TRUE			74.9971	126.224	255
1114	1.87091	677.06	0.290059	0.492345	1	#REF!	#REF!	#REF!	371.333	FALSE			73.9651	125.548	255
1115	1.86891	677.785	0.284764	0.489506	1	#REF!	#REF!	#REF!	371.667	FALSE			72.6149	124.824	255
1116	1.86691	678.511	0.284345	0.479157	1	#REF!	#REF!	#REF!	372	TRUE			72.5079	122.185	255
1117	1.86491	679.239	0.28407	0.472486	1	#REF!	#REF!	#REF!	372.333	FALSE			72.4378	120.484	255
1118	1.86291	679.969	0.284872	0.47478	1	#REF!	#REF!	#REF!	372.667	FALSE			72.6424	121.069	255
1119	1.86091	680.7	0.286125	0.472184	1	#REF!	#REF!	#REF!	373	TRUE			72.9619	120.407	255
1120	1.85891	681.433	0.292552	0.468102	1	#REF!	#REF!	#REF!	373.333	FALSE			74.6008	119.366	255
1121	1.85691	682.167	0.299492	0.466667	1	#REF!	#REF!	#REF!	373.667	FALSE			76.3704	119	255
1122	1.8549	682.903	0.29588	0.465992	1	#REF!	#REF!	#REF!	374	TRUE			75.4495	118.828	255
1123	1.8529	683.64	0.291781	0.459769	1	#REF!	#REF!	#REF!	374.333	FALSE			74.4041	117.241	255
1124	1.8509	684.379	0.294549	0.449937	1	#REF!	#REF!	#REF!	374.667	FALSE			75.1101	114.734	255
1125	1.8489	685.12	0.298039	0.445659	1	#REF!	#REF!	#REF!	375	TRUE			76	113.643	255
1126	1.8469	685.862	0.298701	0.446129	1	#REF!	#REF!	#REF!	375.333	FALSE			76.1688	113.763	255
1127	1.8449	686.606	0.300026	0.445294	1	#REF!	#REF!	#REF!	375.667	FALSE			76.5066	113.55	255
1128	1.8429	687.352	0.30118	0.440718	1	#REF!	#REF!	#REF!	376	TRUE			76.8009	112.383	255
1129	1.8409	688.099	0.301961	0.434714	1	#REF!	#REF!	#REF!	376.333	FALSE			77	110.852	255
1130	1.8389	688.847	0.297284	0.431357	1	#REF!	#REF!	#REF!	376.667	FALSE			75.8075	109.996	255
1131	1.8369	689.598	0.291844	0.432149	1	#REF!	#REF!	#REF!	377	TRUE			74.4202	110.198	255
1132	1.8349	690.35	0.297129	0.426871	1	#REF!	#REF!	#REF!	377.333	FALSE			75.7678	108.852	255
1133	1.83289	691.103	0.303063	0.418078	1	#REF!	#REF!	#REF!	377.667	FALSE			77.2811	106.61	255
1134	1.83089	691.859	0.303808	0.414475	1	#REF!	#REF!	#REF!	378	TRUE			77.471	105.691	255
1135	1.82889	692.616	0.305193	0.412957	1	#REF!	#REF!	#REF!	378.333	FALSE			77.8243	105.304	255
1136	1.82689	693.374	0.300803	0.414118	1	#REF!	#REF!	#REF!	378.667	FALSE			76.7047	105.6	255
1137	1.82489	694.135	0.294669	0.415686	1	#REF!	#REF!	#REF!	379	TRUE			75.1406	106	255
1138	1.82289	694.897	0.304609	0.410455	1	#REF!	#REF!	#REF!	379.333	FALSE			77.6754	104.666	255
1139	1.82089	695.66	0.317647	0.404278	1	#REF!	#REF!	#REF!	379.667	FALSE			81	103.091	255
1140	1.81889	696.426	0.310688	0.404949	1	#REF!	#REF!	#REF!	380	TRUE			79.2255	103.262	255
1141	1.81689	697.193	0.301961	0.401678	1	#REF!	#REF!	#REF!	380.333	FALSE			77	102.428	255
1142	1.81489	697.961	0.308904	0.397933	1	#REF!	#REF!	#REF!	380.667	FALSE			78.7706	101.473	255
1143	1.81288	698.732	0.317647	0.399149	1	#REF!	#REF!	#REF!	381	TRUE			81	101.783	255
1144	1.81088	699.504	0.310719	0.397902	1	#REF!	#REF!	#REF!	381.333	FALSE			79.2333	101.465	255
1145	1.80888	700.277	0.301961	0.396078	1	#REF!	#REF!	#REF!	381.667	FALSE			77	101	255
1146	1.80688	701.053	0.303689	0.394412	1	#REF!	#REF!	#REF!	382	TRUE			77.4407	100.575	255
1147	1.80488	701.83	0.305882	0.387039	1	#REF!	#REF!	#REF!	382.333	FALSE			78	98.695	255
1148	1.80288	702.609	0.300709	0.378776	1	#REF!	#REF!	#REF!	382.667	FALSE			76.6808	96.588	255
1149	1.80088	703.39	0.294118	0.376769	1	#REF!	#REF!	#REF!	383	TRUE			75	96.076	255
1150	1.79888	704.172	0.295838	0.382016	1	#REF!	#REF!	#REF!	383.333	FALSE			75.4388	97.414	255
1151	1.79688	704.956	0.298039	0.389996	1	#REF!	#REF!	#REF!	383.667	FALSE			76	99.449	255
1152	1.79488	705.742	0.299756	0.386569	1	#REF!	#REF!	#REF!	384	TRUE			76.4378	98.575	255
1153	1.79287	706.53	0.301961	0.376894	1	#REF!	#REF!	#REF!	384.333	FALSE			77	96.108	255
1154	1.79087	707.319	0.312238	0.376604	1	#REF!	#REF!	#REF!	384.667	FALSE			79.6208	96.034	255
1155	1.78887	708.111	0.32549	0.382196	1	#REF!	#REF!	#REF!	385	TRUE			83	97.46	255
1156	1.78687	708.903	0.316945	0.380075	1	#REF!	#REF!	#REF!	385.333	FALSE			80.8209	96.919	255
1157	1.78487	709.698	0.305882	0.373451	1	#REF!	#REF!	#REF!	385.667	FALSE			78	95.23	255
1158	1.78287	710.495	0.307587	0.368824	1	#REF!	#REF!	#REF!	386	TRUE			78.4348	94.05	255
1159	1.78087	711.293	0.309804	0.368118	1	#REF!	#REF!	#REF!	386.333	FALSE			79	93.87	255
1160	1.77887	712.093	0.314908	0.369624	1	#REF!	#REF!	#REF!	386.667	FALSE			80.3016	94.254	255
1161	1.77687	712.895	0.321569	0.365808	1	#REF!	#REF!	#REF!	387	TRUE			82	93.281	255
1162	1.77487	713.699	0.318173	0.362176	1	#REF!	#REF!	#REF!	387.333	FALSE			81.1342	92.355	255
1163	1.77286	714.504	0.313725	0.360576	1	#REF!	#REF!	#REF!	387.667	FALSE			80	91.947	255
1164	1.77086	715.312	0.315419	0.355059	1	#REF!	#REF!	#REF!	388	TRUE			80.4319	90.54	255
1165	1.76886	716.121	0.317647	0.35191	1	#REF!	#REF!	#REF!	388.333	FALSE			81	89.737	255
1166	1.76686	716.932	0.324407	0.35669	1	#REF!	#REF!	#REF!	388.667	FALSE			82.7238	90.956	255
1167	1.76486	717.745	0.333333	0.360886	1	#REF!	#REF!	#REF!	389	TRUE			85	92.026	255
1168	1.76286	718.559	0.326589	0.355725	1	#REF!	#REF!	#REF!	389.333	FALSE			83.2801	90.71	255
1169	1.76086	719.376	0.317647	0.347247	1	#REF!	#REF!	#REF!	389.667	FALSE			81	88.548	255
1170	1.75886	720.194	0.319329	0.344702	1	#REF!	#REF!	#REF!	390	TRUE			81.429	87.899	255
1171	1.75686	721.015	0.321569	0.343796	0.992271	#REF!	#REF!	#REF!	390.333	FALSE			82	87.668	253.029
1172	1.75486	721.837	0.316533	0.343753	0.981196	#REF!	#REF!	#REF!	390.667	FALSE			80.716	87.657	250.205
1173	1.75286	722.661	0.309804	0.344051	0.974557	#REF!	#REF!	#REF!	391	TRUE			79	87.733	248.512
1174	1.75085	723.487	0.321527	0.34482	0.966306	#REF!	#REF!	#REF!	391.333	FALSE			81.9893	87.929	246.408
1175	1.74885	724.314	0.337255	0.348216	0.952541	#REF!	#REF!	#REF!	391.667	FALSE			86	88.795	242.898
1176	1.74685	725.144	0.333913	0.346992	0.934165	#REF!	#REF!	#REF!	392	TRUE			85.1479	88.483	238.212
1177	1.74485	725.976	0.329038	0.343525	0.930447	#REF!	#REF!	#REF!	392.333	FALSE			83.9048	87.599	237.264
1178	1.74285	726.809	0.322384	0.340082	0.925557	#REF!	#REF!	#REF!	392.667	FALSE			82.2078	86.721	236.017
1179	1.74085	727.645	0.314288	0.337639	0.925557	#REF!	#REF!	#REF!	393	TRUE			80.1435	86.098	236.017
1180	1.73885	728.482	0.312505	0.339725	0.925596	#REF!	#REF!	#REF!	393.333	FALSE			79.6889	86.63	236.027
1181	1.73685	729.321	0.309804	0.342188	0.924976	#REF!	#REF!	#REF!	393.667	FALSE			79	87.258	235.869
1182	1.73485	730.162	0.317851	0.339086	0.924875	#REF!	#REF!	#REF!	394	TRUE			81.0519	86.467	235.843
1183	1.73285	731.006	0.328717	0.335808	0.921	#REF!	#REF!	#REF!	394.333	FALSE			83.8228	85.631	234.855
1184	1.73084	731.851	0.327295	0.336024	0.915957	#REF!	#REF!	#REF!	394.667	FALSE			83.4602	85.686	233.569
1185	1.72884	732.698	0.32549	0.331871	0.907659	#REF!	#REF!	#REF!	395	TRUE			83	84.627	231.453
1186	1.72684	733.547	0.324262	0.32951	0.895275	#REF!	#REF!	#REF!	395.333	FALSE			82.6867	84.025	228.295
1187	1.72484	734.398	0.322677	0.331196	0.881886	#REF!	#REF!	#REF!	395.667	FALSE			82.2826	84.455	224.881
1188	1.72284	735.251	0.321762	0.33502	0.863145	#REF!	#REF!	#REF!	396	TRUE			82.0493	85.43	220.102
1189	1.72084	736.106	0.320254	0.333906	0.861098	#REF!	#REF!	#REF!	396.333	FALSE			81.6647	85.146	219.58
1190	1.71884	736.963	0.318506	0.329259	0.858824	#REF!	#REF!	#REF!	396.667	FALSE			81.2191	83.961	219
1191	1.71684	737.821	0.316125	0.329165	0.853898	#REF!	#REF!	#REF!	397	TRUE			80.612	83.937	217.744
1192	1.71484	738.682	0.323544	0.330565	0.847059	#REF!	#REF!	#REF!	397.333	FALSE			82.5036	84.294	216
1193	1.71284	739.545	0.333798	0.334094	0.847059	#REF!	#REF!	#REF!	397.667	FALSE			85.1186	85.194	216
1194	1.71083	740.41	0.326938	0.336188	0.847059	#REF!	#REF!	#REF!	398	TRUE			83.3693	85.728	216
1195	1.70883	741.277	0.317647	0.332988	0.827447	#REF!	#REF!	#REF!	398.333	FALSE			81	84.912	210.999
1196	1.70683	742.146	0.315231	0.328988	0.8	#REF!	#REF!	#REF!	398.667	FALSE			80.3838	83.892	204
1197	1.70483	743.017	0.311945	0.329412	0.796737	#REF!	#REF!	#REF!	399	TRUE			79.5461	84	203.168
1198	1.70283	743.89	0.316463	0.329031	0.792157	#REF!	#REF!	#REF!	399.333	FALSE			80.698	83.903	202
1199	1.70083	744.766	0.322367	0.331231	0.788902	#REF!	#REF!	#REF!	399.667	FALSE			82.2035	84.464	201.17
1200	1.69883	745.643	0.322261	0.333416	0.784314	#REF!	#REF!	#REF!	400	TRUE			82.1766	85.021	200
1201	1.69683	746.522	0.322757	0.3298	0.774576	#REF!	#REF!	#REF!	400.333	FALSE			82.3031	84.099	197.517
1202	1.69483	747.404	0.319667	0.330271	0.760784	#REF!	#REF!	#REF!	400.667	FALSE			81.5151	84.219	194
1203	1.69283	748.287	0.314885	0.334953	0.755925	#REF!	#REF!	#REF!	401	TRUE			80.2958	85.413	192.761
1204	1.69082	749.173	0.314782	0.336024	0.74902	#REF!	#REF!	#REF!	401.333	FALSE			80.2694	85.686	191
1205	1.68882	750.06	0.314678	0.333427	0.747404	#REF!	#REF!	#REF!	401.667	FALSE			80.243	85.024	190.588
1206	1.68682	750.95	0.312962	0.331749	0.745098	#REF!	#REF!	#REF!	402	TRUE			79.8053	84.596	190
1207	1.68482	751.842	0.31055	0.331188	0.738651	#REF!	#REF!	#REF!	402.333	FALSE			79.1903	84.453	188.356
1208	1.68282	752.736	0.314194	0.328906	0.729412	#REF!	#REF!	#REF!	402.667	FALSE			80.1195	83.871	186
1209	1.68082	753.632	0.319266	0.32549	0.710122	#REF!	#REF!	#REF!	403	TRUE			81.4129	83	181.081
1210	1.67882	754.53	0.319311	0.327773	0.682353	#REF!	#REF!	#REF!	403.333	FALSE			81.4243	83.582	174
1211	1.67682	755.431	0.320236	0.333259	0.680749	#REF!	#REF!	#REF!	403.667	FALSE			81.6603	84.981	173.591
1212	1.67482	756.333	0.314618	0.34011	0.678431	#REF!	#REF!	#REF!	404	TRUE			80.2275	86.728	173
1213	1.67282	757.238	0.305882	0.343498	0.681631	#REF!	#REF!	#REF!	404.333	FALSE			78	87.592	173.816
1214	1.67082	758.145	0.305892	0.33858	0.686275	#REF!	#REF!	#REF!	404.667	FALSE			78.0024	86.338	175
1215	1.66881	759.054	0.305882	0.33471	0.67989	#REF!	#REF!	#REF!	405	TRUE			78	85.351	173.372
1216	1.66681	759.965	0.3011	0.336212	0.670588	#REF!	#REF!	#REF!	405.333	FALSE			76.7804	85.734	171
1217	1.66481	760.878	0.294118	0.338443	0.66422	#REF!	#REF!	#REF!	405.667	FALSE			75	86.303	169.376
1218	1.66281	761.794	0.298889	0.337639	0.654902	#REF!	#REF!	#REF!	406	TRUE			76.2167	86.098	167
1219	1.66081	762.712	0.305882	0.336318	0.654902	#REF!	#REF!	#REF!	406.333	FALSE			78	85.761	167
1220	1.65881	763.632	0.309056	0.339337	0.654902	#REF!	#REF!	#REF!	406.667	FALSE			78.8092	86.531	167
1221	1.65681	764.554	0.313725	0.348722	0.642224	#REF!	#REF!	#REF!	407	TRUE			80	88.924	163.767
1222	1.65481	765.479	0.31056	0.354722	0.623529	#REF!	#REF!	#REF!	407.333	FALSE			79.1928	90.454	159
1223	1.65281	766.405	0.305882	0.35222	0.62511	#REF!	#REF!	#REF!	407.667	FALSE			78	89.816	159.403
1224	1.65081	767.334	0.307461	0.35238	0.627451	#REF!	#REF!	#REF!	408	TRUE			78.4026	89.857	160
1225	1.6488	768.266	0.309804	0.35602	0.619565	#REF!	#REF!	#REF!	408.333	FALSE			79	90.785	157.989
1226	1.6468	769.199	0.305078	0.356475	0.607843	#REF!	#REF!	#REF!	408.667	FALSE			77.795	90.901	155
1227	1.6448	770.135	0.298039	0.358529	0.587392	#REF!	#REF!	#REF!	409	TRUE			76	91.425	149.785
1228	1.6428	771.073	0.301182	0.360918	0.556863	#REF!	#REF!	#REF!	409.333	FALSE			76.8014	92.034	142
1229	1.6408	772.013	0.305882	0.360808	0.56942	#REF!	#REF!	#REF!	409.667	FALSE			78	92.006	145.202
1230	1.6388	772.956	0.302747	0.362467	0.588004	#REF!	#REF!	#REF!	410	TRUE			77.2006	92.429	149.941
1231	1.6368	773.901	0.298039	0.367961	0.579976	#REF!	#REF!	#REF!	410.333	FALSE			76	93.83	147.894
1232	1.6348	774.848	0.296476	0.3722	0.56838	#REF!	#REF!	#REF!	410.667	FALSE			75.6013	94.911	144.937
1233	1.6328	775.798	0.294118	0.370573	0.568145	#REF!	#REF!	#REF!	411	TRUE			75	94.496	144.877
1234	1.6308	776.749	0.292558	0.371749	0.567745	#REF!	#REF!	#REF!	411.333	FALSE			74.6022	94.796	144.775
1235	1.62879	777.704	0.290196	0.373569	0.559765	#REF!	#REF!	#REF!	411.667	FALSE			74	95.26	142.74
1236	1.62679	778.66	0.290196	0.370565	0.547757	#REF!	#REF!	#REF!	412	TRUE			74	94.494	139.678
1237	1.62479	779.619	0.290196	0.375369	0.541635	#REF!	#REF!	#REF!	412.333	FALSE			74	95.719	138.117
1238	1.62279	780.581	0.291748	0.378016	0.53251	#REF!	#REF!	#REF!	412.667	FALSE			74.3958	96.394	135.79
1239	1.62079	781.544	0.294118	0.377827	0.529678	#REF!	#REF!	#REF!	413	TRUE			75	96.346	135.068
1240	1.61879	782.51	0.281731	0.386051	0.52549	#REF!	#REF!	#REF!	413.333	FALSE			71.8414	98.443	134
1241	1.61679	783.479	0.262745	0.394812	0.521082	#REF!	#REF!	#REF!	413.667	FALSE			67	100.677	132.876
1242	1.61479	784.45	0.270468	0.396808	0.514031	#REF!	#REF!	#REF!	414	TRUE			68.9693	101.186	131.078
1243	1.61279	785.423	0.282353	0.398651	0.512718	#REF!	#REF!	#REF!	414.333	FALSE			72	101.656	130.743
1244	1.61079	786.399	0.280812	0.405604	0.510663	#REF!	#REF!	#REF!	414.667	FALSE			71.6071	103.429	130.219
1245	1.60878	787.377	0.278431	0.409537	0.497137	#REF!	#REF!	#REF!	415	TRUE			71	104.432	126.77
1246	1.60678	788.357	0.279968	0.406529	0.476843	#REF!	#REF!	#REF!	415.333	FALSE			71.3919	103.665	121.595
1247	1.60478	789.34	0.282353	0.403584	0.483545	#REF!	#REF!	#REF!	415.667	FALSE			72	102.914	123.304
1248	1.60278	790.326	0.276221	0.407682	0.494118	#REF!	#REF!	#REF!	416	TRUE			70.4363	103.959	126
1249	1.60078	791.314	0.266667	0.412976	0.484133	#REF!	#REF!	#REF!	416.333	FALSE			68	105.309	123.454
1250	1.59878	792.304	0.271254	0.411745	0.468639	#REF!	#REF!	#REF!	416.667	FALSE			69.1698	104.995	119.503
1251	1.59678	793.297	0.278431	0.412439	0.465761	#REF!	#REF!	#REF!	417	TRUE			71	105.172	118.769
1252	1.59478	794.292	0.275381	0.415451	0.461388	#REF!	#REF!	#REF!	417.333	FALSE			70.2221	105.94	117.654
1253	1.59278	795.29	0.270847	0.419882	0.458816	#REF!	#REF!	#REF!	417.667	FALSE			69.0659	107.07	116.998
1254	1.59078	796.29	0.276728	0.424263	0.454114	#REF!	#REF!	#REF!	418	TRUE			70.5657	108.187	115.799
1255	1.58878	797.293	0.285103	0.428373	0.452592	#REF!	#REF!	#REF!	418.333	FALSE			72.7013	109.235	115.411
1256	1.58677	798.299	0.279845	0.433424	0.450773	#REF!	#REF!	#REF!	418.667	FALSE			71.3606	110.523	114.947
1257	1.58477	799.307	0.272586	0.438616	0.443945	#REF!	#REF!	#REF!	419	TRUE			69.5095	111.847	113.206
1258	1.58277	800.317	0.274281	0.441953	0.432557	#REF!	#REF!	#REF!	419.333	FALSE			69.9416	112.698	110.302
1259	1.58077	801.33	0.276629	0.442467	0.437251	#REF!	#REF!	#REF!	419.667	FALSE			70.5403	112.829	111.499
1260	1.57877	802.346	0.27689	0.443137	0.445071	#REF!	#REF!	#REF!	420	TRUE			70.6069	113	113.493
1261	1.57677	803.364	0.276605	0.443827	0.433416	#REF!	#REF!	#REF!	420.333	FALSE			70.5344	113.176	110.521
1262	1.57477	804.385	0.271935	0.447753	0.414169	#REF!	#REF!	#REF!	420.667	FALSE			69.3435	114.177	105.613
1263	1.57277	805.408	0.264984	0.454859	0.416498	#REF!	#REF!	#REF!	421	TRUE			67.571	115.989	106.207
1264	1.57077	806.434	0.264626	0.458824	0.421086	#REF!	#REF!	#REF!	421.333	FALSE			67.4796	117	107.377
1265	1.56877	807.463	0.264129	0.459416	0.417165	#REF!	#REF!	#REF!	421.667	FALSE			67.3529	117.151	106.377
1266	1.56676	808.494	0.265495	0.46158	0.410506	#REF!	#REF!	#REF!	422	TRUE			67.7011	117.703	104.679
1267	1.56476	809.528	0.267344	0.466463	0.410671	#REF!	#REF!	#REF!	422.333	FALSE			68.1728	118.948	104.721
1268	1.56276	810.564	0.266654	0.47231	0.410855	#REF!	#REF!	#REF!	422.667	FALSE			67.9968	120.439	104.768
1269	1.56076	811.604	0.264927	0.474592	0.40258	#REF!	#REF!	#REF!	423	TRUE			67.5564	121.021	102.658
1270	1.55876	812.645	0.262453	0.474494	0.38831	#REF!	#REF!	#REF!	423.333	FALSE			66.9255	120.996	99.019
1271	1.55676	813.69	0.258795	0.477549	0.386745	#REF!	#REF!	#REF!	423.667	FALSE			65.9927	121.775	98.62
1272	1.55476	814.737	0.258157	0.485424	0.384314	#REF!	#REF!	#REF!	424	TRUE			65.83	123.783	98
1273	1.55276	815.787	0.256671	0.493165	0.384314	#REF!	#REF!	#REF!	424.333	FALSE			65.451	125.757	98
1274	1.55076	816.84	0.260205	0.499522	0.384314	#REF!	#REF!	#REF!	424.667	FALSE			66.3522	127.378	98
1275	1.54876	817.895	0.266701	0.497518	0.391722	#REF!	#REF!	#REF!	425	TRUE			68.0088	126.867	99.889
1276	1.54675	818.953	0.260163	0.492082	0.403922	#REF!	#REF!	#REF!	425.333	FALSE			66.3415	125.481	103
1277	1.54475	820.014	0.248414	0.501294	0.403922	#REF!	#REF!	#REF!	425.667	FALSE			63.3455	127.83	103
1278	1.54275	821.078	0.253742	0.510988	0.403922	#REF!	#REF!	#REF!	426	TRUE			64.7042	130.302	103
1279	1.54075	822.144	0.262745	0.513576	0.396553	#REF!	#REF!	#REF!	426.333	FALSE			67	130.962	101.121
1280	1.53875	823.213	0.260489	0.52229	0.384314	#REF!	#REF!	#REF!	426.667	FALSE			66.4247	133.184	98
1281	1.53675	824.285	0.25694	0.526925	0.384314	#REF!	#REF!	#REF!	427	TRUE			65.5198	134.366	98
1282	1.53475	825.36	0.255365	0.523741	0.384314	#REF!	#REF!	#REF!	427.333	FALSE			65.1181	133.554	98
1283	1.53275	826.437	0.252697	0.522776	0.387247	#REF!	#REF!	#REF!	427.667	FALSE			64.4378	133.308	98.748
1284	1.53075	827.517	0.252771	0.525314	0.392157	#REF!	#REF!	#REF!	428	TRUE			64.4567	133.955	100
1285	1.52875	828.601	0.252789	0.530875	0.39362	#REF!	#REF!	#REF!	428.333	FALSE			64.4612	135.373	100.373
1286	1.52674	829.687	0.250756	0.534792	0.396078	#REF!	#REF!	#REF!	428.667	FALSE			63.9429	136.372	101
1287	1.52474	830.775	0.246737	0.532878	0.387329	#REF!	#REF!	#REF!	429	TRUE			62.918	135.884	98.769
1288	1.52274	831.867	0.247165	0.524455	0.372549	#REF!	#REF!	#REF!	429.333	FALSE			63.027	133.736	95
1289	1.52074	832.962	0.247403	0.525902	0.372549	#REF!	#REF!	#REF!	429.667	FALSE			63.0878	134.105	95
1290	1.51874	834.059	0.248525	0.533965	0.372549	#REF!	#REF!	#REF!	430	TRUE			63.3738	136.161	95
1291	1.51674	835.159	0.25098	0.546533	0.375451	#REF!	#REF!	#REF!	430.333	FALSE			64	139.366	95.74
1292	1.51474	836.263	0.25098	0.559204	0.380392	#REF!	#REF!	#REF!	430.667	FALSE			64	142.597	97
1293	1.51274	837.369	0.25098	0.556133	0.384733	#REF!	#REF!	#REF!	431	TRUE			64	141.814	98.107
1294	1.51074	838.478	0.248091	0.550447	0.392157	#REF!	#REF!	#REF!	431.333	FALSE			63.2631	140.364	100
1295	1.50874	839.59	0.243137	0.553349	0.389271	#REF!	#REF!	#REF!	431.667	FALSE			62	141.104	99.264
1296	1.50673	840.705	0.244578	0.562224	0.384314	#REF!	#REF!	#REF!	432	TRUE			62.3675	143.367	98
1297	1.50473	841.823	0.247059	0.564706	0.382875	#REF!	#REF!	#REF!	432.333	FALSE			63	144	97.633
1298	1.50273	842.944	0.245622	0.564737	0.380392	#REF!	#REF!	#REF!	432.667	FALSE			62.6335	144.008	97
1299	1.50073	844.068	0.243137	0.565078	0.380392	#REF!	#REF!	#REF!	433	TRUE			62	144.095	97
1300	1.49873	845.195	0.246004	0.565522	0.380392	#REF!	#REF!	#REF!	433.333	FALSE			62.7311	144.208	97
1301	1.49673	846.325	0.25098	0.569992	0.380392	#REF!	#REF!	#REF!	433.667	FALSE			64	145.348	97
1302	1.49473	847.458	0.249551	0.58178	0.380392	#REF!	#REF!	#REF!	434	TRUE			63.6354	148.354	97
1303	1.49273	848.594	0.247059	0.590047	0.384675	#REF!	#REF!	#REF!	434.333	FALSE			63	150.462	98.092
1304	1.49073	849.733	0.244207	0.591663	0.392157	#REF!	#REF!	#REF!	434.667	FALSE			62.2728	150.874	100
1305	1.48873	850.875	0.239216	0.593643	0.396427	#REF!	#REF!	#REF!	435	TRUE			61	151.379	101.089
1306	1.48673	852.02	0.240638	0.590506	0.403922	#REF!	#REF!	#REF!	435.333	FALSE			61.3626	150.579	103
1307	1.48472	853.168	0.243137	0.585733	0.403922	#REF!	#REF!	#REF!	435.667	FALSE			62	149.362	103
1308	1.48272	854.32	0.240301	0.589769	0.403922	#REF!	#REF!	#REF!	436	TRUE			61.2767	150.391	103
1309	1.48072	855.474	0.235294	0.592384	0.405337	#REF!	#REF!	#REF!	436.333	FALSE			60	151.058	103.361
1310	1.47872	856.632	0.236709	0.596247	0.407843	#REF!	#REF!	#REF!	436.667	FALSE			60.3607	152.043	104
1311	1.47672	857.792	0.239216	0.602337	0.402192	#REF!	#REF!	#REF!	437	TRUE			61	153.596	102.559
1312	1.47472	858.956	0.243447	0.597302	0.3924	#REF!	#REF!	#REF!	437.333	FALSE			62.0791	152.312	100.062
1313	1.47272	860.123	0.25098	0.592416	0.399659	#REF!	#REF!	#REF!	437.667	FALSE			64	151.066	101.913
1314	1.47072	861.294	0.243947	0.596537	0.412016	#REF!	#REF!	#REF!	438	TRUE			62.2064	152.117	105.064
1315	1.46872	862.467	0.231373	0.605325	0.416451	#REF!	#REF!	#REF!	438.333	FALSE			59	154.358	106.195
1316	1.46672	863.644	0.235581	0.609247	0.424416	#REF!	#REF!	#REF!	438.667	FALSE			60.0732	155.358	108.226
1317	1.46471	864.824	0.243137	0.610557	0.431612	#REF!	#REF!	#REF!	439	TRUE			62	155.692	110.061
1318	1.46271	866.007	0.243137	0.608478	0.444408	#REF!	#REF!	#REF!	439.333	FALSE			62	155.162	113.324
1319	1.46071	867.193	0.243137	0.607698	0.444859	#REF!	#REF!	#REF!	439.667	FALSE			62	154.963	113.439
1320	1.45871	868.382	0.241742	0.599722	0.44562	#REF!	#REF!	#REF!	440	TRUE			61.6442	152.929	113.633
1321	1.45671	869.575	0.239216	0.589478	0.446969	#REF!	#REF!	#REF!	440.333	FALSE			61	150.317	113.977
1322	1.45471	870.771	0.24339	0.596329	0.449094	#REF!	#REF!	#REF!	440.667	FALSE			62.0644	152.064	114.519
1323	1.45271	871.971	0.25098	0.602925	0.452459	#REF!	#REF!	#REF!	441	TRUE			64	153.746	115.377
1324	1.45071	873.174	0.246818	0.602596	0.458529	#REF!	#REF!	#REF!	441.333	FALSE			62.9385	153.662	116.925
1325	1.44871	874.38	0.239216	0.605227	0.463439	#REF!	#REF!	#REF!	441.667	FALSE			61	154.333	118.177
1326	1.44671	875.589	0.236448	0.602557	0.471988	#REF!	#REF!	#REF!	442	TRUE			60.2943	153.652	120.357
1327	1.4447	876.802	0.231373	0.602247	0.471757	#REF!	#REF!	#REF!	442.333	FALSE			59	153.573	120.298
1328	1.4427	878.018	0.232753	0.612408	0.471443	#REF!	#REF!	#REF!	442.667	FALSE			59.3519	156.164	120.218
1329	1.4407	879.237	0.235587	0.613553	0.475271	#REF!	#REF!	#REF!	443	TRUE			60.0747	156.456	121.194
1330	1.4387	880.46	0.238508	0.608961	0.482	#REF!	#REF!	#REF!	443.333	FALSE			60.8196	155.285	122.91
1331	1.4367	881.686	0.243442	0.605353	0.491035	#REF!	#REF!	#REF!	443.667	FALSE			62.0776	154.365	125.214
1332	1.4347	882.916	0.24326	0.604604	0.507914	#REF!	#REF!	#REF!	444	TRUE			62.0312	154.174	129.518
1333	1.4327	884.149	0.242626	0.605204	0.510255	#REF!	#REF!	#REF!	444.333	FALSE			61.8697	154.327	130.115
1334	1.4307	885.386	0.245474	0.604333	0.513725	#REF!	#REF!	#REF!	444.667	FALSE			62.5959	154.105	131
1335	1.4287	886.626	0.25098	0.605471	0.517247	#REF!	#REF!	#REF!	445	TRUE			64	154.395	131.898
1336	1.4267	887.869	0.247744	0.603776	0.523925	#REF!	#REF!	#REF!	445.333	FALSE			63.1746	153.963	133.601
1337	1.42469	889.116	0.241989	0.597545	0.528796	#REF!	#REF!	#REF!	445.667	FALSE			61.7072	152.374	134.843
1338	1.42269	890.367	0.243237	0.598812	0.538235	#REF!	#REF!	#REF!	446	TRUE			62.0255	152.697	137.25
1339	1.42069	891.621	0.244796	0.601718	0.545004	#REF!	#REF!	#REF!	446.333	FALSE			62.4231	153.438	138.976
1340	1.41869	892.878	0.242228	0.59829	0.556863	#REF!	#REF!	#REF!	446.667	FALSE			61.7681	152.564	142
1341	1.41669	894.14	0.23797	0.591239	0.560639	#REF!	#REF!	#REF!	447	TRUE			60.6823	150.766	142.963
1342	1.41469	895.404	0.240883	0.598522	0.568553	#REF!	#REF!	#REF!	447.333	FALSE			61.4251	152.623	144.981
1343	1.41269	896.673	0.246226	0.607424	0.576384	#REF!	#REF!	#REF!	447.667	FALSE			62.7877	154.893	146.978
1344	1.41069	897.944	0.245515	0.604651	0.59049	#REF!	#REF!	#REF!	448	TRUE			62.6062	154.186	150.575
1345	1.40869	899.22	0.243556	0.601576	0.587702	#REF!	#REF!	#REF!	448.333	FALSE			62.1069	153.402	149.864
1346	1.40669	900.499	0.247313	0.590549	0.581	#REF!	#REF!	#REF!	448.667	FALSE			63.0649	150.59	148.155
1347	1.40469	901.782	0.254902	0.5846	0.589784	#REF!	#REF!	#REF!	449	TRUE			65	149.073	150.395
1348	1.40268	903.068	0.254059	0.588651	0.607012	#REF!	#REF!	#REF!	449.333	FALSE			64.7851	150.106	154.788
1349	1.40068	904.358	0.251922	0.587106	0.613247	#REF!	#REF!	#REF!	449.667	FALSE			64.2401	149.712	156.378
1350	1.39868	905.652	0.25126	0.585651	0.625659	#REF!	#REF!	#REF!	450	TRUE			64.0714	149.341	159.543
1351	1.39668	906.95	0.25098	0.588365	0.624102	#REF!	#REF!	#REF!	450.333	FALSE			64	150.033	159.146
1352	1.39468	908.251	0.255475	0.585675	0.619608	#REF!	#REF!	#REF!	450.667	FALSE			65.146	149.347	158
1353	1.39268	909.556	0.264089	0.580392	0.628933	#REF!	#REF!	#REF!	451	TRUE			67.3426	148	160.378
1354	1.39068	910.864	0.259574	0.579063	0.647059	#REF!	#REF!	#REF!	451.333	FALSE			66.1914	147.661	165
1355	1.38868	912.177	0.25098	0.5778	0.651043	#REF!	#REF!	#REF!	451.667	FALSE			64	147.339	166.016
1356	1.38668	913.493	0.252584	0.5816	0.658824	#REF!	#REF!	#REF!	452	TRUE			64.409	148.308	168
1357	1.38468	914.813	0.256033	0.582545	0.672067	#REF!	#REF!	#REF!	452.333	FALSE			65.2884	148.549	171.377
1358	1.38267	916.137	0.257944	0.577937	0.698039	#REF!	#REF!	#REF!	452.667	FALSE			65.7758	147.374	178
1359	1.38067	917.465	0.261298	0.573357	0.6954	#REF!	#REF!	#REF!	453	TRUE			66.631	146.206	177.327
1360	1.37867	918.797	0.260603	0.57082	0.690196	#REF!	#REF!	#REF!	453.333	FALSE			66.4538	145.559	176
1361	1.37667	920.132	0.258824	0.565506	0.698098	#REF!	#REF!	#REF!	453.667	FALSE			66	144.204	178.015
1362	1.37467	921.471	0.257786	0.559102	0.713725	#REF!	#REF!	#REF!	454	TRUE			65.7354	142.571	182
1363	1.37267	922.815	0.255522	0.563118	0.721604	#REF!	#REF!	#REF!	454.333	FALSE			65.1581	143.595	184.009
1364	1.37067	924.162	0.253866	0.561325	0.737255	#REF!	#REF!	#REF!	454.667	FALSE			64.7359	143.138	188
1365	1.36867	925.513	0.25098	0.551345	0.737255	#REF!	#REF!	#REF!	455	TRUE			64	140.593	188
1366	1.36667	926.868	0.252287	0.552071	0.737255	#REF!	#REF!	#REF!	455.333	FALSE			64.3333	140.778	188
1367	1.36467	928.227	0.254902	0.559282	0.738561	#REF!	#REF!	#REF!	455.667	FALSE			65	142.617	188.333
1368	1.36266	929.59	0.256205	0.557988	0.741176	#REF!	#REF!	#REF!	456	TRUE			65.3324	142.287	189
1369	1.36066	930.957	0.258824	0.54618	0.747682	#REF!	#REF!	#REF!	456.333	FALSE			66	139.276	190.659
1370	1.35866	932.328	0.264022	0.536875	0.760784	#REF!	#REF!	#REF!	456.667	FALSE			67.3255	136.903	194
1371	1.35666	933.703	0.27451	0.534522	0.772463	#REF!	#REF!	#REF!	457	TRUE			70	136.303	196.978
1372	1.35466	935.082	0.273214	0.531506	0.796078	#REF!	#REF!	#REF!	457.333	FALSE			69.6696	135.534	203
1373	1.35266	936.466	0.270588	0.531388	0.79349	#REF!	#REF!	#REF!	457.667	FALSE			69	135.504	202.34
1374	1.35066	937.853	0.268004	0.52829	0.788235	#REF!	#REF!	#REF!	458	TRUE			68.3411	134.714	201
1375	1.34866	939.245	0.262745	0.520694	0.788235	#REF!	#REF!	#REF!	458.333	FALSE			67	132.777	201
1376	1.34666	940.64	0.264033	0.519886	0.788235	#REF!	#REF!	#REF!	458.667	FALSE			67.3285	132.571	201
1377	1.34466	942.04	0.266667	0.521843	0.795953	#REF!	#REF!	#REF!	459	TRUE			68	133.07	202.968
1378	1.34265	943.444	0.269235	0.513498	0.811765	#REF!	#REF!	#REF!	459.333	FALSE			68.655	130.942	207
1379	1.34065	944.852	0.27451	0.505808	0.820741	#REF!	#REF!	#REF!	459.667	FALSE			70	128.981	209.289
1380	1.33865	946.264	0.27451	0.515008	0.839216	#REF!	#REF!	#REF!	460	TRUE			70	131.327	214
1381	1.33665	947.681	0.27451	0.512533	0.837937	#REF!	#REF!	#REF!	460.333	FALSE			70	130.696	213.674
1382	1.33465	949.102	0.275786	0.499408	0.835294	#REF!	#REF!	#REF!	460.667	FALSE			70.3255	127.349	213
1383	1.33265	950.527	0.278431	0.494439	0.840392	#REF!	#REF!	#REF!	461	TRUE			71	126.082	214.3
1384	1.33065	951.956	0.283522	0.494722	0.85098	#REF!	#REF!	#REF!	461.333	FALSE			72.2982	126.154	217
1385	1.32865	953.39	0.294118	0.491576	0.854792	#REF!	#REF!	#REF!	461.667	FALSE			75	125.352	217.972
1386	1.32665	954.828	0.283966	0.482694	0.862745	#REF!	#REF!	#REF!	462	TRUE			72.4114	123.087	220
1387	1.32465	956.27	0.262745	0.47258	0.866545	#REF!	#REF!	#REF!	462.333	FALSE			67	120.508	220.969
1388	1.32265	957.717	0.267805	0.470643	0.87451	#REF!	#REF!	#REF!	462.667	FALSE			68.2904	120.014	223
1389	1.32064	959.168	0.278431	0.480678	0.868192	#REF!	#REF!	#REF!	463	TRUE			71	122.573	221.389
1390	1.31864	960.623	0.278431	0.485012	0.854902	#REF!	#REF!	#REF!	463.333	FALSE			71	123.678	218
1391	1.31664	962.083	0.278431	0.481024	0.866235	#REF!	#REF!	#REF!	463.667	FALSE			71	122.661	220.89
1392	1.31464	963.548	0.275916	0.474533	0.890196	#REF!	#REF!	#REF!	464	TRUE			70.3587	121.006	227
1393	1.31264	965.016	0.270588	0.462871	0.896475	#REF!	#REF!	#REF!	464.333	FALSE			69	118.032	228.601
1394	1.31064	966.49	0.274349	0.454969	0.909804	#REF!	#REF!	#REF!	464.667	FALSE			69.959	116.017	232
1395	1.30864	967.968	0.282353	0.45371	0.908706	#REF!	#REF!	#REF!	465	TRUE			72	115.696	231.72
1396	1.30664	969.45	0.281103	0.450725	0.906651	#REF!	#REF!	#REF!	465.333	FALSE			71.6813	114.935	231.196
1397	1.30464	970.937	0.278431	0.451988	0.908298	#REF!	#REF!	#REF!	465.667	FALSE			71	115.257	231.616
1398	1.30264	972.428	0.277185	0.454902	0.911596	#REF!	#REF!	#REF!	466	TRUE			70.6823	116	232.457
1399	1.30063	973.924	0.27451	0.452416	0.922867	#REF!	#REF!	#REF!	466.333	FALSE			70	115.366	235.331
1400	1.29863	975.425	0.283205	0.443333	0.945824	#REF!	#REF!	#REF!	466.667	FALSE			72.2172	113.05	241.185
1401	1.29663	976.93	0.301961	0.434286	0.933639	#REF!	#REF!	#REF!	467	TRUE			77	110.743	238.078
1402	1.29463	978.44	0.297007	0.429725	0.909667	#REF!	#REF!	#REF!	467.333	FALSE			75.7369	109.58	231.965
1403	1.29263	979.955	0.286275	0.426051	0.915078	#REF!	#REF!	#REF!	467.667	FALSE			73	108.643	233.345
1404	1.29063	981.474	0.285045	0.429651	0.924969	#REF!	#REF!	#REF!	468	TRUE			72.6866	109.561	235.867
1405	1.28863	982.998	0.28268	0.428141	0.932725	#REF!	#REF!	#REF!	468.333	FALSE			72.0835	109.176	237.845
1406	1.28663	984.527	0.286349	0.425612	0.946875	#REF!	#REF!	#REF!	468.667	FALSE			73.019	108.531	241.453
1407	1.28463	986.06	0.293486	0.428427	0.954176	#REF!	#REF!	#REF!	469	TRUE			74.8389	109.249	243.315
1408	1.28263	987.599	0.29534	0.422039	0.970851	#REF!	#REF!	#REF!	469.333	FALSE			75.3116	107.62	247.567
1409	1.28062	989.142	0.299348	0.415686	0.962651	#REF!	#REF!	#REF!	469.667	FALSE			76.3338	106	245.476
1410	1.27862	990.69	0.297556	0.414463	0.944961	#REF!	#REF!	#REF!	470	TRUE			75.8769	105.688	240.965
1411	1.27662	992.243	0.294847	0.411239	0.948698	#REF!	#REF!	#REF!	470.333	FALSE			75.1859	104.866	241.918
1412	1.27462	993.8	0.292771	0.411753	0.958302	#REF!	#REF!	#REF!	470.667	FALSE			74.6565	104.997	244.367
1413	1.27262	995.363	0.288146	0.413835	0.960345	#REF!	#REF!	#REF!	471	TRUE			73.4773	105.528	244.888
1414	1.27062	996.93	0.290462	0.408608	0.964816	#REF!	#REF!	#REF!	471.333	FALSE			74.0677	104.195	246.028
1415	1.26862	998.503	0.29526	0.405996	0.959612	#REF!	#REF!	#REF!	471.667	FALSE			75.2914	103.529	244.701
1416	1.26662	1000.08	0.29619	0.403671	0.946431	#REF!	#REF!	#REF!	472	TRUE			75.5285	102.936	241.34
1417	1.26462	1001.66	0.298039	0.397647	0.947541	#REF!	#REF!	#REF!	472.333	FALSE			76	101.4	241.623
1418	1.26262	1003.25	0.294864	0.398494	0.95058	#REF!	#REF!	#REF!	472.667	FALSE			75.1902	101.616	242.398
1419	1.26061	1004.84	0.287831	0.402718	0.954263	#REF!	#REF!	#REF!	473	TRUE			73.3968	102.693	243.337
1420	1.25861	1006.44	0.290342	0.396388	0.963153	#REF!	#REF!	#REF!	473.333	FALSE			74.0371	101.079	245.604
1421	1.25661	1008.04	0.29588	0.389435	0.951125	#REF!	#REF!	#REF!	473.667	FALSE			75.4495	99.306	242.537
1422	1.25461	1009.65	0.293642	0.394557	0.923525	#REF!	#REF!	#REF!	474	TRUE			74.8786	100.612	235.499
1423	1.25261	1011.26	0.288227	0.397275	0.93078	#REF!	#REF!	#REF!	474.333	FALSE			73.4978	101.305	237.349
1424	1.25061	1012.88	0.292771	0.390275	0.946082	#REF!	#REF!	#REF!	474.667	FALSE			74.6567	99.52	241.251
1425	1.24861	1014.5	0.302845	0.388506	0.943871	#REF!	#REF!	#REF!	475	TRUE			77.2255	99.069	240.687
1426	1.24661	1016.13	0.302716	0.386643	0.938843	#REF!	#REF!	#REF!	475.333	FALSE			77.1925	98.594	239.405
1427	1.24461	1017.77	0.3035	0.383259	0.937039	#REF!	#REF!	#REF!	475.667	FALSE			77.3924	97.731	238.945
1428	1.24261	1019.41	0.302091	0.388235	0.933333	#REF!	#REF!	#REF!	476	TRUE			77.0332	99	238
1429	1.24061	1021.05	0.299296	0.388235	0.930961	#REF!	#REF!	#REF!	476.333	FALSE			76.3206	99	237.395
1430	1.2386	1022.7	0.300617	0.387051	0.92549	#REF!	#REF!	#REF!	476.667	FALSE			76.6573	98.698	236
1431	1.2366	1024.35	0.303086	0.383322	0.92629	#REF!	#REF!	#REF!	477	TRUE			77.287	97.747	236.204
1432	1.2346	1026.01	0.301494	0.383192	0.928529	#REF!	#REF!	#REF!	477.333	FALSE			76.881	97.714	236.775
1433	1.2326	1027.68	0.298039	0.390694	0.921914	#REF!	#REF!	#REF!	477.667	FALSE			76	99.627	235.088
1434	1.2306	1029.35	0.298284	0.39602	0.905824	#REF!	#REF!	#REF!	478	TRUE			76.0624	100.985	230.985
1435	1.2286	1031.03	0.298751	0.393596	0.897655	#REF!	#REF!	#REF!	478.333	FALSE			76.1815	100.367	228.902
1436	1.2266	1032.71	0.301257	0.386882	0.878431	#REF!	#REF!	#REF!	478.667	FALSE			76.8206	98.655	224
1437	1.2246	1034.4	0.307783	0.383325	0.87609	#REF!	#REF!	#REF!	479	TRUE			78.4846	97.748	223.403
1438	1.2226	1036.09	0.306217	0.378263	0.870588	#REF!	#REF!	#REF!	479.333	FALSE			78.0853	96.457	222
1439	1.2206	1037.79	0.301662	0.375784	0.877592	#REF!	#REF!	#REF!	479.667	FALSE			76.9239	95.825	223.786
1440	1.21859	1039.49	0.302815	0.382647	0.894118	#REF!	#REF!	#REF!	480	TRUE			77.2178	97.575	228
1441	1.21659	1041.2	0.305607	0.383459	0.882482	#REF!	#REF!	#REF!	480.333	FALSE			77.9297	97.782	225.033
1442	1.21459	1042.92	0.300074	0.379188	0.854902	#REF!	#REF!	#REF!	480.667	FALSE			76.5188	96.693	218
1443	1.21259	1044.64	0.286275	0.380392	0.846784	#REF!	#REF!	#REF!	481	TRUE			73	97	215.93
1444	1.21059	1046.36	0.287433	0.380118	0.827451	#REF!	#REF!	#REF!	481.333	FALSE			73.2953	96.93	211
1445	1.20859	1048.1	0.290196	0.378514	0.832075	#REF!	#REF!	#REF!	481.667	FALSE			74	96.521	212.179
1446	1.20659	1049.84	0.292504	0.377953	0.843137	#REF!	#REF!	#REF!	482	TRUE			74.5886	96.378	215
1447	1.20459	1051.58	0.298039	0.384706	0.839682	#REF!	#REF!	#REF!	482.333	FALSE			76	98.1	214.119
1448	1.20259	1053.33	0.298039	0.393306	0.831373	#REF!	#REF!	#REF!	482.667	FALSE			76	100.293	212
1449	1.20059	1055.08	0.298039	0.396078	0.821039	#REF!	#REF!	#REF!	483	TRUE			76	101	209.365
1450	1.19858	1056.85	0.295746	0.394663	0.796078	#REF!	#REF!	#REF!	483.333	FALSE			75.4153	100.639	203
1451	1.19658	1058.61	0.290196	0.390286	0.794933	#REF!	#REF!	#REF!	483.667	FALSE			74	99.523	202.708
1452	1.19458	1060.39	0.290196	0.389494	0.792157	#REF!	#REF!	#REF!	484	TRUE			74	99.321	202
1453	1.19258	1062.17	0.290196	0.396227	0.788733	#REF!	#REF!	#REF!	484.333	FALSE			74	101.038	201.127
1454	1.19058	1063.95	0.294751	0.403024	0.780392	#REF!	#REF!	#REF!	484.667	FALSE			75.1615	102.771	199
1455	1.18858	1065.74	0.305882	0.405902	0.773573	#REF!	#REF!	#REF!	485	TRUE			78	103.505	197.261
1456	1.18658	1067.54	0.300208	0.406467	0.756863	#REF!	#REF!	#REF!	485.333	FALSE			76.553	103.649	193
1457	1.18458	1069.34	0.286275	0.409686	0.7478	#REF!	#REF!	#REF!	485.667	FALSE			73	104.47	190.689
1458	1.18258	1071.15	0.284012	0.415071	0.72549	#REF!	#REF!	#REF!	486	TRUE			72.4231	105.843	185
1459	1.18058	1072.97	0.278431	0.414882	0.723231	#REF!	#REF!	#REF!	486.333	FALSE			71	105.795	184.424
1460	1.17857	1074.79	0.280686	0.416388	0.717647	#REF!	#REF!	#REF!	486.667	FALSE			71.5749	106.179	183
1461	1.17657	1076.62	0.286275	0.421922	0.708643	#REF!	#REF!	#REF!	487	TRUE			73	107.59	180.704
1462	1.17457	1078.45	0.288522	0.425671	0.686275	#REF!	#REF!	#REF!	487.333	FALSE			73.573	108.546	175
1463	1.17257	1080.29	0.294118	0.427063	0.687396	#REF!	#REF!	#REF!	487.667	FALSE			75	108.901	175.286
1464	1.17057	1082.14	0.292998	0.426216	0.690196	#REF!	#REF!	#REF!	488	TRUE			74.7145	108.685	176
1465	1.16857	1083.99	0.290196	0.430671	0.682373	#REF!	#REF!	#REF!	488.333	FALSE			74	109.821	174.005
1466	1.16657	1085.85	0.287964	0.434812	0.662745	#REF!	#REF!	#REF!	488.667	FALSE			73.4309	110.877	169
1467	1.16457	1087.72	0.282353	0.430259	0.666086	#REF!	#REF!	#REF!	489	TRUE			72	109.716	169.852
1468	1.16257	1089.59	0.285689	0.429478	0.67451	#REF!	#REF!	#REF!	489.333	FALSE			72.8507	109.517	172
1469	1.16057	1091.47	0.294118	0.436745	0.663408	#REF!	#REF!	#REF!	489.667	FALSE			75	111.37	169.169
1470	1.15857	1093.35	0.293009	0.442412	0.635294	#REF!	#REF!	#REF!	490	TRUE			74.7174	112.815	162
1471	1.15656	1095.24	0.290196	0.443137	0.624231	#REF!	#REF!	#REF!	490.333	FALSE			74	113	159.179
1472	1.15456	1097.14	0.285779	0.444243	0.596078	#REF!	#REF!	#REF!	490.667	FALSE			72.8736	113.282	152
1473	1.15256	1099.05	0.27451	0.447122	0.600486	#REF!	#REF!	#REF!	491	TRUE			70	114.016	153.124
1474	1.15056	1100.96	0.27561	0.448247	0.611765	#REF!	#REF!	#REF!	491.333	FALSE			70.2806	114.303	156
1475	1.14856	1102.88	0.278431	0.45098	0.599682	#REF!	#REF!	#REF!	491.667	FALSE			71	115	152.919
1476	1.14656	1104.8	0.271851	0.453243	0.568835	#REF!	#REF!	#REF!	492	TRUE			69.3221	115.577	145.053
1477	1.14456	1106.73	0.254902	0.457941	0.564604	#REF!	#REF!	#REF!	492.333	FALSE			65	116.775	143.974
1478	1.14256	1108.67	0.259273	0.455424	0.552941	#REF!	#REF!	#REF!	492.667	FALSE			66.1147	116.133	141
1479	1.14056	1110.62	0.270588	0.458788	0.555918	#REF!	#REF!	#REF!	493	TRUE			69	116.991	141.759
1480	1.13856	1112.57	0.269536	0.470384	0.563349	#REF!	#REF!	#REF!	493.333	FALSE			68.7318	119.948	143.654
1481	1.13655	1114.53	0.266667	0.479129	0.557604	#REF!	#REF!	#REF!	493.667	FALSE			68	122.178	142.189
1482	1.13455	1116.49	0.264682	0.478631	0.543749	#REF!	#REF!	#REF!	494	TRUE			67.494	122.051	138.656
1483	1.13255	1118.46	0.259805	0.475376	0.539043	#REF!	#REF!	#REF!	494.333	FALSE			66.2504	121.221	137.456
1484	1.13055	1120.44	0.261803	0.475839	0.525239	#REF!	#REF!	#REF!	494.667	FALSE			66.7598	121.339	133.936
1485	1.12855	1122.43	0.266133	0.48358	0.525275	#REF!	#REF!	#REF!	495	TRUE			67.8638	123.313	133.945
1486	1.12655	1124.42	0.265504	0.489169	0.526333	#REF!	#REF!	#REF!	495.333	FALSE			67.7035	124.738	134.215
1487	1.12455	1126.42	0.263704	0.488769	0.516984	#REF!	#REF!	#REF!	495.667	FALSE			67.2445	124.636	131.831
1488	1.12255	1128.43	0.264215	0.488835	0.493576	#REF!	#REF!	#REF!	496	TRUE			67.3748	124.653	125.862
1489	1.12055	1130.45	0.266667	0.493282	0.493792	#REF!	#REF!	#REF!	496.333	FALSE			68	125.787	125.917
1490	1.11855	1132.47	0.26424	0.498039	0.493318	#REF!	#REF!	#REF!	496.667	FALSE			67.3813	127	125.796
1491	1.11654	1134.5	0.257669	0.497792	0.489525	#REF!	#REF!	#REF!	497	TRUE			65.7057	126.937	124.829
1492	1.11454	1136.54	0.257143	0.500082	0.478588	#REF!	#REF!	#REF!	497.333	FALSE			65.5715	127.521	122.04
1493	1.11254	1138.58	0.256424	0.508039	0.480878	#REF!	#REF!	#REF!	497.667	FALSE			65.388	129.55	122.624
1494	1.11054	1140.63	0.254444	0.506278	0.485937	#REF!	#REF!	#REF!	498	TRUE			64.8831	129.101	123.914
1495	1.10854	1142.69	0.24862	0.497933	0.480396	#REF!	#REF!	#REF!	498.333	FALSE			63.3982	126.973	122.501
1496	1.10654	1144.76	0.252278	0.500157	0.464639	#REF!	#REF!	#REF!	498.667	FALSE			64.3309	127.54	118.483
1497	1.10454	1146.83	0.260598	0.506443	0.464416	#REF!	#REF!	#REF!	499	TRUE			66.4524	129.143	118.426
1498	1.10254	1148.91	0.258682	0.50911	0.464494	#REF!	#REF!	#REF!	499.333	FALSE			65.9638	129.823	118.446
1499	1.10054	1151	0.252881	0.510855	0.462514	#REF!	#REF!	#REF!	499.667	FALSE			64.4846	130.268	117.941
1500	1.09854	1153.1	0.25382	0.507439	0.456333	#REF!	#REF!	#REF!	500	TRUE			64.7241	129.397	116.365
1501	1.09653	1155.2	0.257543	0.508271	0.457812	#REF!	#REF!	#REF!	500.333	FALSE			65.6735	129.609	116.742
1502	1.09453	1157.31	0.257677	0.512408	0.465129	#REF!	#REF!	#REF!	500.667	FALSE			65.7076	130.664	118.608
1503	1.09253	1159.43	0.257296	0.517055	0.464098	#REF!	#REF!	#REF!	501	TRUE			65.6105	131.849	118.345
1504	1.09053	1161.56	0.255407	0.517776	0.4604	#REF!	#REF!	#REF!	501.333	FALSE			65.1287	132.033	117.402
1505	1.08853	1163.7	0.2497	0.5166	0.460122	#REF!	#REF!	#REF!	501.667	FALSE			63.6735	131.733	117.331
1506	1.08653	1165.84	0.248131	0.520529	0.458824	#REF!	#REF!	#REF!	502	TRUE			63.2735	132.735	117
1507	1.08453	1167.99	0.244251	0.516608	0.460196	#REF!	#REF!	#REF!	502.333	FALSE			62.284	131.735	117.35
1508	1.08253	1170.15	0.244649	0.515796	0.464294	#REF!	#REF!	#REF!	502.667	FALSE			62.3856	131.528	118.395
1509	1.08053	1172.32	0.246152	0.522051	0.464882	#REF!	#REF!	#REF!	503	TRUE			62.7687	133.123	118.545
1510	1.07853	1174.49	0.247498	0.525757	0.466396	#REF!	#REF!	#REF!	503.333	FALSE			63.112	134.068	118.931
1511	1.07653	1176.67	0.25098	0.531059	0.461678	#REF!	#REF!	#REF!	503.667	FALSE			64	135.42	117.728
1512	1.07452	1178.87	0.248925	0.526949	0.446651	#REF!	#REF!	#REF!	504	TRUE			63.4758	134.372	113.896
1513	1.07252	1181.06	0.243137	0.519369	0.449208	#REF!	#REF!	#REF!	504.333	FALSE			62	132.439	114.548
1514	1.07052	1183.27	0.243137	0.513941	0.455769	#REF!	#REF!	#REF!	504.667	FALSE			62	131.055	116.221
1515	1.06852	1185.49	0.243137	0.513878	0.45529	#REF!	#REF!	#REF!	505	TRUE			62	131.039	116.099
1516	1.06652	1187.71	0.239439	0.514796	0.454925	#REF!	#REF!	#REF!	505.333	FALSE			61.057	131.273	116.006
1517	1.06452	1189.95	0.228094	0.516576	0.461012	#REF!	#REF!	#REF!	505.667	FALSE			58.164	131.727	117.558
1518	1.06252	1192.19	0.229484	0.509745	0.478431	#REF!	#REF!	#REF!	506	TRUE			58.5183	129.985	122
1519	1.06052	1194.44	0.235294	0.500525	0.483502	#REF!	#REF!	#REF!	506.333	FALSE			60	127.634	123.293
1520	1.05852	1196.69	0.236307	0.506424	0.498039	#REF!	#REF!	#REF!	506.667	FALSE			60.2582	129.138	127
1521	1.05652	1198.96	0.239216	0.507125	0.497027	#REF!	#REF!	#REF!	507	TRUE			61	129.317	126.742
1522	1.05451	1201.23	0.241233	0.507706	0.494118	#REF!	#REF!	#REF!	507.333	FALSE			61.5144	129.465	126
1523	1.05251	1203.52	0.247059	0.509804	0.498145	#REF!	#REF!	#REF!	507.667	FALSE			63	130	127.027
1524	1.05051	1205.81	0.24304	0.508365	0.509804	#REF!	#REF!	#REF!	508	TRUE			61.9751	129.633	130
1525	1.04851	1208.11	0.231373	0.501247	0.509804	#REF!	#REF!	#REF!	508.333	FALSE			59	127.818	130
1526	1.04651	1210.42	0.238379	0.491584	0.509804	#REF!	#REF!	#REF!	508.667	FALSE			60.7867	125.354	130
1527	1.04451	1212.74	0.258824	0.491196	0.518796	#REF!	#REF!	#REF!	509	TRUE			66	125.255	132.293
1528	1.04251	1215.07	0.252841	0.492408	0.545098	#REF!	#REF!	#REF!	509.333	FALSE			64.4744	125.564	139
1529	1.04051	1217.41	0.235294	0.48451	0.544102	#REF!	#REF!	#REF!	509.667	FALSE			60	123.55	138.746
1530	1.03851	1219.75	0.237281	0.47682	0.541176	#REF!	#REF!	#REF!	510	TRUE			60.5066	121.589	138
1531	1.03651	1222.11	0.243137	0.478494	0.544149	#REF!	#REF!	#REF!	510.333	FALSE			62	122.016	138.758
1532	1.0345	1224.47	0.243137	0.473902	0.552941	#REF!	#REF!	#REF!	510.667	FALSE			62	120.845	141
1533	1.0325	1226.84	0.243137	0.474569	0.554918	#REF!	#REF!	#REF!	511	TRUE			62	121.015	141.504
1534	1.0305	1229.22	0.245109	0.479988	0.560784	#REF!	#REF!	#REF!	511.333	FALSE			62.5027	122.397	143
1535	1.0285	1231.62	0.25098	0.471557	0.563737	#REF!	#REF!	#REF!	511.667	FALSE			64	120.247	143.753
1536	1.0265	1234.02	0.249017	0.462816	0.572549	#REF!	#REF!	#REF!	512	TRUE			63.4993	118.018	146
1537	1.0245	1236.43	0.243137	0.462165	0.577447	#REF!	#REF!	#REF!	512.333	FALSE			62	117.852	147.249
1538	1.0225	1238.85	0.246071	0.461004	0.592157	#REF!	#REF!	#REF!	512.667	FALSE			62.7482	117.556	151
1539	1.0205	1241.28	0.254902	0.461227	0.598012	#REF!	#REF!	#REF!	513	TRUE			65	117.613	152.493
1540	1.0185	1243.71	0.254902	0.454039	0.615686	#REF!	#REF!	#REF!	513.333	FALSE			65	115.78	157
1541	1.0165	1246.16	0.254902	0.446247	0.612769	#REF!	#REF!	#REF!	513.667	FALSE			65	113.793	156.256
1542	1.01449	1248.62	0.251991	0.446302	0.603922	#REF!	#REF!	#REF!	514	TRUE			64.2577	113.807	154
1543	1.01249	1251.09	0.243137	0.445122	0.613604	#REF!	#REF!	#REF!	514.333	FALSE			62	113.506	156.469
1544	1.01049	1253.57	0.24507	0.437906	0.643137	#REF!	#REF!	#REF!	514.667	FALSE			62.4929	111.666	164
1545	1.00849	1256.05	0.25098	0.432749	0.642173	#REF!	#REF!	#REF!	515	TRUE			64	110.351	163.754
1546	1.00649	1258.55	0.249055	0.42811	0.639216	#REF!	#REF!	#REF!	515.333	FALSE			63.509	109.168	163
1547	1.00449	1261.06	0.243137	0.422808	0.647863	#REF!	#REF!	#REF!	515.667	FALSE			62	107.816	165.205
1548	1.00249	1263.57	0.244096	0.420059	0.67451	#REF!	#REF!	#REF!	516	TRUE			62.2445	107.115	172
1549	1.00049	1266.1	0.247059	0.420733	0.670682	#REF!	#REF!	#REF!	516.333	FALSE			63	107.287	171.024
1550	0.998487	1268.64	0.249924	0.426141	0.658824	#REF!	#REF!	#REF!	516.667	FALSE			63.7306	108.666	168
1551	0.996486	1271.19	0.258824	0.42222	0.6674	#REF!	#REF!	#REF!	517	TRUE			66	107.666	170.187
1552	0.994485	1273.74	0.256921	0.417016	0.694118	#REF!	#REF!	#REF!	517.333	FALSE			65.5149	106.339	177
1553	0.992484	1276.31	0.25098	0.41771	0.696016	#REF!	#REF!	#REF!	517.667	FALSE			64	106.516	177.484
1554	0.990483	1278.89	0.249085	0.409871	0.701961	#REF!	#REF!	#REF!	518	TRUE			63.5168	104.517	179
1555	0.988482	1281.48	0.243137	0.403922	0.704796	#REF!	#REF!	#REF!	518.333	FALSE			62	103	179.723
1556	0.986481	1284.08	0.242237	0.403894	0.713725	#REF!	#REF!	#REF!	518.667	FALSE			61.7705	102.993	182
1557	0.98448	1286.69	0.239216	0.402016	0.711843	#REF!	#REF!	#REF!	519	TRUE			61	102.514	181.52
1558	0.982479	1289.31	0.238558	0.395137	0.706027	#REF!	#REF!	#REF!	519.333	FALSE			60.8323	100.76	180.037
1559	0.980478	1291.94	0.236988	0.392973	0.711643	#REF!	#REF!	#REF!	519.667	FALSE			60.4319	100.208	181.469
1560	0.978477	1294.58	0.23906	0.394349	0.72862	#REF!	#REF!	#REF!	520	TRUE			60.9603	100.559	185.798
1561	0.976476	1297.24	0.244228	0.3904	0.727063	#REF!	#REF!	#REF!	520.333	FALSE			62.2782	99.552	185.401
1562	0.974475	1299.9	0.242879	0.388235	0.723392	#REF!	#REF!	#REF!	520.667	FALSE			61.9342	99	184.465
1563	0.972474	1302.57	0.238303	0.386769	0.727918	#REF!	#REF!	#REF!	521	TRUE			60.7672	98.626	185.619
1564	0.970473	1305.26	0.240286	0.38311	0.740569	#REF!	#REF!	#REF!	521.333	FALSE			61.2729	97.693	188.845
1565	0.968472	1307.96	0.245141	0.385447	0.74298	#REF!	#REF!	#REF!	521.667	FALSE			62.511	98.289	189.46
1566	0.966471	1310.66	0.245685	0.383388	0.752941	#REF!	#REF!	#REF!	522	TRUE			62.6498	97.764	192
1567	0.96447	1313.38	0.248224	0.380392	0.751976	#REF!	#REF!	#REF!	522.333	FALSE			63.2972	97	191.754
1568	0.962469	1316.11	0.250765	0.379471	0.749216	#REF!	#REF!	#REF!	522.667	FALSE			63.945	96.765	191.05
1569	0.960469	1318.86	0.259019	0.374898	0.747498	#REF!	#REF!	#REF!	523	TRUE			66.0498	95.599	190.612
1570	0.958468	1321.61	0.255199	0.368933	0.740918	#REF!	#REF!	#REF!	523.333	FALSE			65.0757	94.078	188.934
1571	0.956467	1324.37	0.241558	0.366016	0.736933	#REF!	#REF!	#REF!	523.667	FALSE			61.5974	93.334	187.918
1572	0.954466	1327.15	0.24276	0.366714	0.72298	#REF!	#REF!	#REF!	524	TRUE			61.9037	93.512	184.36
1573	0.952465	1329.94	0.247059	0.3682	0.729314	#REF!	#REF!	#REF!	524.333	FALSE			63	93.891	185.975
1574	0.950464	1332.74	0.246216	0.363082	0.750976	#REF!	#REF!	#REF!	524.667	FALSE			62.7851	92.586	191.499
1575	0.948463	1335.55	0.243011	0.359749	0.751604	#REF!	#REF!	#REF!	525	TRUE			61.9678	91.736	191.659
1576	0.946462	1338.37	0.243206	0.357008	0.750482	#REF!	#REF!	#REF!	525.333	FALSE			62.0175	91.037	191.373
1577	0.944461	1341.21	0.245336	0.353769	0.741365	#REF!	#REF!	#REF!	525.667	FALSE			62.5608	90.211	189.048
1578	0.94246	1344.06	0.244381	0.357714	0.709753	#REF!	#REF!	#REF!	526	TRUE			62.3172	91.217	180.987
1579	0.940459	1346.92	0.240731	0.358855	0.711525	#REF!	#REF!	#REF!	526.333	FALSE			61.3865	91.508	181.439
1580	0.938458	1349.79	0.243176	0.354275	0.718518	#REF!	#REF!	#REF!	526.667	FALSE			62.01	90.34	183.222
1581	0.936457	1352.67	0.252278	0.35862	0.716537	#REF!	#REF!	#REF!	527	TRUE			64.3309	91.448	182.717
1582	0.934456	1355.57	0.249011	0.361443	0.708169	#REF!	#REF!	#REF!	527.333	FALSE			63.4979	92.168	180.583
1583	0.932455	1358.48	0.235782	0.358318	0.706894	#REF!	#REF!	#REF!	527.667	FALSE			60.1245	91.371	180.258
1584	0.930454	1361.4	0.234479	0.359694	0.703482	#REF!	#REF!	#REF!	528	TRUE			59.7921	91.722	179.388
1585	0.928453	1364.33	0.231034	0.36382	0.696369	#REF!	#REF!	#REF!	528.333	FALSE			58.9136	92.774	177.574
1586	0.926452	1367.28	0.229018	0.362557	0.673753	#REF!	#REF!	#REF!	528.667	FALSE			58.3996	92.452	171.807
1587	0.924451	1370.24	0.223529	0.369027	0.673663	#REF!	#REF!	#REF!	529	TRUE			57	94.102	171.784
1588	0.92245	1373.21	0.225294	0.369047	0.671557	#REF!	#REF!	#REF!	529.333	FALSE			57.45	94.107	171.247
1589	0.920449	1376.2	0.231373	0.364506	0.671165	#REF!	#REF!	#REF!	529.667	FALSE			59	92.949	171.147
1590	0.918448	1379.2	0.228822	0.367055	0.671376	#REF!	#REF!	#REF!	530	TRUE			58.3496	93.599	171.201
1591	0.916447	1382.21	0.219884	0.3674	0.662565	#REF!	#REF!	#REF!	530.333	FALSE			56.0703	93.687	168.954
1592	0.914446	1385.23	0.221606	0.366282	0.631616	#REF!	#REF!	#REF!	530.667	FALSE			56.5096	93.402	161.062
1593	0.912445	1388.27	0.227658	0.359635	0.631043	#REF!	#REF!	#REF!	531	TRUE			58.0527	91.707	160.916
1594	0.910444	1391.32	0.22658	0.359008	0.631373	#REF!	#REF!	#REF!	531.333	FALSE			57.7779	91.547	161
1595	0.908443	1394.39	0.223529	0.367278	0.627369	#REF!	#REF!	#REF!	531.667	FALSE			57	93.656	159.979
1596	0.906442	1397.46	0.224396	0.37562	0.612827	#REF!	#REF!	#REF!	532	TRUE			57.2211	95.783	156.271
1597	0.904441	1400.55	0.227451	0.374404	0.612067	#REF!	#REF!	#REF!	532.333	FALSE			58	95.473	156.077
1598	0.90244	1403.66	0.224862	0.366922	0.611639	#REF!	#REF!	#REF!	532.667	FALSE			57.3397	93.565	155.968
1599	0.900439	1406.78	0.215686	0.361945	0.60229	#REF!	#REF!	#REF!	533	TRUE			55	92.296	153.584
1600	0.898438	1409.91	0.216545	0.368639	0.568627	#REF!	#REF!	#REF!	533.333	FALSE			55.2191	94.003	145
1601	0.896437	1413.06	0.219608	0.382639	0.5712	#REF!	#REF!	#REF!	533.667	FALSE			56	97.573	145.656
1602	0.894436	1416.22	0.220464	0.389184	0.580392	#REF!	#REF!	#REF!	534	TRUE			56.2182	99.242	148
1603	0.892435	1419.4	0.223529	0.3796	0.573565	#REF!	#REF!	#REF!	534.333	FALSE			57	96.798	146.259
1604	0.890434	1422.59	0.220123	0.375851	0.54902	#REF!	#REF!	#REF!	534.667	FALSE			56.1313	95.842	140
1605	0.888433	1425.79	0.207843	0.387063	0.546471	#REF!	#REF!	#REF!	535	TRUE			53	98.701	139.35
1606	0.886432	1429.01	0.209539	0.398408	0.537255	#REF!	#REF!	#REF!	535.333	FALSE			53.4324	101.594	137
1607	0.884431	1432.24	0.215686	0.393545	0.533871	#REF!	#REF!	#REF!	535.667	FALSE			55	100.354	136.137
1608	0.88243	1435.49	0.217375	0.387502	0.521569	#REF!	#REF!	#REF!	536	TRUE			55.4305	98.813	133
1609	0.880429	1438.75	0.223529	0.389078	0.516518	#REF!	#REF!	#REF!	536.333	FALSE			57	99.215	131.712
1610	0.878429	1442.03	0.223529	0.393596	0.498039	#REF!	#REF!	#REF!	536.667	FALSE			57	100.367	127
1611	0.876428	1445.32	0.223529	0.399616	0.4972	#REF!	#REF!	#REF!	537	TRUE			57	101.902	126.786
1612	0.874427	1448.63	0.221857	0.403722	0.494118	#REF!	#REF!	#REF!	537.333	FALSE			56.5735	102.949	126
1613	0.872426	1451.95	0.215686	0.407008	0.491616	#REF!	#REF!	#REF!	537.667	FALSE			55	103.787	125.362
1614	0.870425	1455.29	0.215686	0.402576	0.482353	#REF!	#REF!	#REF!	538	TRUE			55	102.657	123
1615	0.868424	1458.64	0.215686	0.396855	0.474047	#REF!	#REF!	#REF!	538.333	FALSE			55	101.198	120.882
1616	0.866423	1462.01	0.215686	0.394329	0.443137	#REF!	#REF!	#REF!	538.667	FALSE			55	100.554	113
1617	0.864422	1465.4	0.215686	0.397733	0.441482	#REF!	#REF!	#REF!	539	TRUE			55	101.422	112.578
1618	0.862421	1468.8	0.216511	0.403922	0.435294	#REF!	#REF!	#REF!	539.333	FALSE			55.2103	103	111
1619	0.86042	1472.21	0.219608	0.404745	0.433647	#REF!	#REF!	#REF!	539.667	FALSE			56	103.21	110.58
1620	0.858419	1475.64	0.219608	0.407792	0.427451	#REF!	#REF!	#REF!	540	TRUE			56	103.987	109
1621	0.856418	1479.09	0.219608	0.406584	0.426631	#REF!	#REF!	#REF!	540.333	FALSE			56	103.679	108.791
1622	0.854417	1482.55	0.217973	0.402604	0.423529	#REF!	#REF!	#REF!	540.667	FALSE			55.5832	102.664	108
1623	0.852416	1486.03	0.211765	0.4	0.423529	#REF!	#REF!	#REF!	541	TRUE			54	102	108
1624	0.850415	1489.53	0.212578	0.40009	0.423529	#REF!	#REF!	#REF!	541.333	FALSE			54.2074	102.023	108
1625	0.848414	1493.04	0.215686	0.401776	0.427588	#REF!	#REF!	#REF!	541.667	FALSE			55	102.453	109.035
1626	0.846413	1496.57	0.215686	0.409098	0.443137	#REF!	#REF!	#REF!	542	TRUE			55	104.32	113
1627	0.844412	1500.12	0.215686	0.414518	0.439098	#REF!	#REF!	#REF!	542.333	FALSE			55	105.702	111.97
1628	0.842411	1503.68	0.21488	0.412416	0.423529	#REF!	#REF!	#REF!	542.667	FALSE			54.7945	105.166	108
1629	0.84041	1507.26	0.211765	0.403118	0.423529	#REF!	#REF!	#REF!	543	TRUE			54	102.795	108
1630	0.838409	1510.86	0.210963	0.40018	0.423529	#REF!	#REF!	#REF!	543.333	FALSE			53.7955	102.046	108
1631	0.836408	1514.48	0.207843	0.400145	0.425129	#REF!	#REF!	#REF!	543.667	FALSE			53	102.037	108.408
1632	0.834407	1518.11	0.209511	0.398773	0.431373	#REF!	#REF!	#REF!	544	TRUE			53.4254	101.687	110
1633	0.832406	1521.76	0.21583	0.403922	0.434557	#REF!	#REF!	#REF!	544.333	FALSE			55.0366	103	110.812
1634	0.830405	1525.42	0.215089	0.403125	0.447059	#REF!	#REF!	#REF!	544.667	FALSE			54.8477	102.797	114
1635	0.828404	1529.11	0.211765	0.400082	0.448643	#REF!	#REF!	#REF!	545	TRUE			54	102.021	114.404
1636	0.826403	1532.81	0.212464	0.398725	0.454902	#REF!	#REF!	#REF!	545.333	FALSE			54.1782	101.675	116
1637	0.824402	1536.53	0.215129	0.392369	0.453325	#REF!	#REF!	#REF!	545.667	FALSE			54.858	100.054	115.598
1638	0.822401	1540.27	0.215291	0.393012	0.447059	#REF!	#REF!	#REF!	546	TRUE			54.8992	100.218	114
1639	0.8204	1544.03	0.21645	0.39449	0.446275	#REF!	#REF!	#REF!	546.333	FALSE			55.1947	100.595	113.8
1640	0.818399	1547.8	0.2176	0.387451	0.443443	#REF!	#REF!	#REF!	546.667	FALSE			55.4879	98.8	113.078
1641	0.816398	1551.6	0.221589	0.385059	0.449188	#REF!	#REF!	#REF!	547	TRUE			56.5051	98.19	114.543
1642	0.814397	1555.41	0.221456	0.388745	0.470855	#REF!	#REF!	#REF!	547.333	FALSE			56.4713	99.13	120.068
1643	0.812396	1559.24	0.221962	0.389608	0.474694	#REF!	#REF!	#REF!	547.667	FALSE			56.6003	99.35	121.047
1644	0.810395	1563.09	0.220634	0.380075	0.489737	#REF!	#REF!	#REF!	548	TRUE			56.2617	96.919	124.883
1645	0.808394	1566.96	0.214302	0.376251	0.488757	#REF!	#REF!	#REF!	548.333	FALSE			54.6471	95.944	124.633
1646	0.806393	1570.85	0.215076	0.372427	0.484973	#REF!	#REF!	#REF!	548.667	FALSE			54.8445	94.969	123.668
1647	0.804392	1574.75	0.218867	0.368604	0.488004	#REF!	#REF!	#REF!	549	TRUE			55.8111	93.994	124.441
1648	0.802391	1578.68	0.217644	0.365549	0.501118	#REF!	#REF!	#REF!	549.333	FALSE			55.4991	93.215	127.785
1649	0.80039	1582.63	0.211765	0.365459	0.500157	#REF!	#REF!	#REF!	549.667	FALSE			54	93.192	127.54
1650	0.798389	1586.59	0.211741	0.363941	0.497643	#REF!	#REF!	#REF!	550	TRUE			53.994	92.805	126.899
1651	0.796388	1590.58	0.211851	0.360565	0.508886	#REF!	#REF!	#REF!	550.333	FALSE			54.022	91.944	129.766
1652	0.794388	1594.59	0.211649	0.358039	0.550008	#REF!	#REF!	#REF!	550.667	FALSE			53.9706	91.3	140.252
1653	0.792387	1598.61	0.210054	0.352122	0.550149	#REF!	#REF!	#REF!	551	TRUE			53.5637	89.791	140.288
1654	0.790386	1602.66	0.210777	0.353549	0.555447	#REF!	#REF!	#REF!	551.333	FALSE			53.7481	90.155	141.639
1655	0.788385	1606.73	0.213269	0.350094	0.551753	#REF!	#REF!	#REF!	551.667	FALSE			54.3836	89.274	140.697
1656	0.786384	1610.82	0.210909	0.343443	0.536353	#REF!	#REF!	#REF!	552	TRUE			53.7818	87.578	136.77
1657	0.784383	1614.93	0.201298	0.340541	0.539294	#REF!	#REF!	#REF!	552.333	FALSE			51.3309	86.838	137.52
1658	0.782382	1619.06	0.201194	0.341478	0.552941	#REF!	#REF!	#REF!	552.667	FALSE			51.3045	87.077	141
1659	0.780381	1623.21	0.201091	0.334145	0.553325	#REF!	#REF!	#REF!	553	TRUE			51.2782	85.207	141.098
1660	0.77838	1627.38	0.201738	0.327863	0.554871	#REF!	#REF!	#REF!	553.333	FALSE			51.4431	83.605	141.492
1661	0.776379	1631.57	0.204421	0.321067	0.554129	#REF!	#REF!	#REF!	553.667	FALSE			52.1274	81.872	141.303
1662	0.774378	1635.79	0.203167	0.322494	0.551643	#REF!	#REF!	#REF!	554	TRUE			51.8076	82.236	140.669
1663	0.772377	1640.03	0.2	0.331894	0.555816	#REF!	#REF!	#REF!	554.333	FALSE			51	84.633	141.733
1664	0.770376	1644.29	0.198742	0.32758	0.572549	#REF!	#REF!	#REF!	554.667	FALSE			50.6792	83.533	146
1665	0.768375	1648.57	0.193098	0.316467	0.571431	#REF!	#REF!	#REF!	555	TRUE			49.2401	80.699	145.715
1666	0.766374	1652.87	0.194679	0.31838	0.566212	#REF!	#REF!	#REF!	555.333	FALSE			49.6431	81.187	144.384
1667	0.764373	1657.2	0.202865	0.321569	0.565149	#REF!	#REF!	#REF!	555.667	FALSE			51.7306	82	144.113
1668	0.762372	1661.55	0.20124	0.320839	0.562376	#REF!	#REF!	#REF!	556	TRUE			51.3163	81.814	143.406
1669	0.760371	1665.92	0.192214	0.316922	0.558533	#REF!	#REF!	#REF!	556.333	FALSE			49.0146	80.815	142.426
1670	0.75837	1670.32	0.192882	0.313725	0.540153	#REF!	#REF!	#REF!	556.667	FALSE			49.185	80	137.739
1671	0.756369	1674.74	0.196078	0.313165	0.543251	#REF!	#REF!	#REF!	557	TRUE			50	79.857	138.529
1672	0.754368	1679.18	0.193192	0.311886	0.56	#REF!	#REF!	#REF!	557.333	FALSE			49.264	79.531	142.8
1673	0.752367	1683.65	0.180392	0.316925	0.557722	#REF!	#REF!	#REF!	557.667	FALSE			46	80.816	142.219
1674	0.750366	1688.14	0.182545	0.31229	0.546871	#REF!	#REF!	#REF!	558	TRUE			46.549	79.634	139.452
1675	0.748365	1692.65	0.192157	0.3066	0.546133	#REF!	#REF!	#REF!	558.333	FALSE			49	78.183	139.264
1676	0.746364	1697.19	0.192157	0.309165	0.544298	#REF!	#REF!	#REF!	558.667	FALSE			49	78.837	138.796
1677	0.744363	1701.75	0.192157	0.306243	0.542463	#REF!	#REF!	#REF!	559	TRUE			49	78.092	138.328
1678	0.742362	1706.34	0.190737	0.305588	0.533333	#REF!	#REF!	#REF!	559.333	FALSE			48.6379	77.925	136
1679	0.740361	1710.95	0.184314	0.302855	0.529247	#REF!	#REF!	#REF!	559.667	FALSE			47	77.228	134.958
1680	0.73836	1715.58	0.18502	0.306588	0.509941	#REF!	#REF!	#REF!	560	TRUE			47.1801	78.18	130.035
1681	0.736359	1720.25	0.188235	0.309741	0.50769	#REF!	#REF!	#REF!	560.333	FALSE			48	78.984	129.461
1682	0.734358	1724.93	0.186128	0.309071	0.498039	#REF!	#REF!	#REF!	560.667	FALSE			47.4627	78.813	127
1683	0.732357	1729.65	0.176471	0.304212	0.498039	#REF!	#REF!	#REF!	561	TRUE			45	77.574	127
1684	0.730356	1734.39	0.178566	0.297871	0.498039	#REF!	#REF!	#REF!	561.333	FALSE			45.5344	75.957	127
1685	0.728355	1739.15	0.188235	0.299659	0.494557	#REF!	#REF!	#REF!	561.667	FALSE			48	76.413	126.112
1686	0.726354	1743.94	0.186151	0.304169	0.478431	#REF!	#REF!	#REF!	562	TRUE			47.4685	77.563	122
1687	0.724353	1748.76	0.176471	0.308459	0.474969	#REF!	#REF!	#REF!	562.333	FALSE			45	78.657	121.117
1688	0.722352	1753.6	0.177162	0.304576	0.458824	#REF!	#REF!	#REF!	562.667	FALSE			45.1762	77.667	117
1689	0.720351	1758.47	0.180392	0.303192	0.45538	#REF!	#REF!	#REF!	563	TRUE			46	77.314	116.122
1690	0.71835	1763.37	0.179705	0.308341	0.439216	#REF!	#REF!	#REF!	563.333	FALSE			45.8248	78.627	112
1691	0.716349	1768.3	0.176471	0.305196	0.439216	#REF!	#REF!	#REF!	563.667	FALSE			45	77.825	112
1692	0.714348	1773.25	0.175104	0.302157	0.439216	#REF!	#REF!	#REF!	564	TRUE			44.6515	77.05	112
1693	0.712347	1778.23	0.168627	0.303188	0.434447	#REF!	#REF!	#REF!	564.333	FALSE			43	77.313	110.784
1694	0.710347	1783.24	0.170666	0.303514	0.411765	#REF!	#REF!	#REF!	564.667	FALSE			43.5198	77.396	105
1695	0.708346	1788.28	0.180392	0.305475	0.411086	#REF!	#REF!	#REF!	565	TRUE			46	77.896	104.827
1696	0.706345	1793.35	0.179716	0.308804	0.407843	#REF!	#REF!	#REF!	565.333	FALSE			45.8277	78.745	104
1697	0.704344	1798.44	0.176471	0.308867	0.4038	#REF!	#REF!	#REF!	565.667	FALSE			45	78.761	102.969
1698	0.702343	1803.56	0.176471	0.312224	0.384314	#REF!	#REF!	#REF!	566	TRUE			45	79.617	98
1699	0.700342	1808.72	0.176471	0.312737	0.382973	#REF!	#REF!	#REF!	566.333	FALSE			45	79.748	97.658
1700	0.698341	1813.9	0.179142	0.310345	0.376471	#REF!	#REF!	#REF!	566.667	FALSE			45.6813	79.138	96
1701	0.69634	1819.11	0.192157	0.313122	0.375137	#REF!	#REF!	#REF!	567	TRUE			49	79.846	95.66
1702	0.694339	1824.35	0.191493	0.309663	0.368627	#REF!	#REF!	#REF!	567.333	FALSE			48.8307	78.964	94
1703	0.692338	1829.63	0.188235	0.308282	0.369953	#REF!	#REF!	#REF!	567.667	FALSE			48	78.612	94.338
1704	0.690337	1834.93	0.188235	0.311169	0.376471	#REF!	#REF!	#REF!	568	TRUE			48	79.348	96
1705	0.688336	1840.26	0.188235	0.309804	0.375812	#REF!	#REF!	#REF!	568.333	FALSE			48	79	95.832
1706	0.686335	1845.63	0.185609	0.310459	0.372549	#REF!	#REF!	#REF!	568.667	FALSE			47.3304	79.167	95
1707	0.684334	1851.03	0.172549	0.313071	0.372549	#REF!	#REF!	#REF!	569	TRUE			44	79.833	95
1708	0.682333	1856.45	0.174584	0.308918	0.372549	#REF!	#REF!	#REF!	569.333	FALSE			44.519	78.774	95
1709	0.680332	1861.91	0.184159	0.304745	0.371898	#REF!	#REF!	#REF!	569.667	FALSE			46.9605	77.71	94.834
1710	0.678331	1867.41	0.182195	0.307071	0.368627	#REF!	#REF!	#REF!	570	TRUE			46.4596	78.303	94
1711	0.67633	1872.93	0.172911	0.306565	0.369922	#REF!	#REF!	#REF!	570.333	FALSE			44.0922	78.174	94.33
1712	0.674329	1878.49	0.174151	0.299996	0.376471	#REF!	#REF!	#REF!	570.667	FALSE			44.4085	76.499	96
1713	0.672328	1884.08	0.179824	0.298176	0.376471	#REF!	#REF!	#REF!	571	TRUE			45.8551	76.035	96
1714	0.670327	1889.7	0.178548	0.29469	0.376471	#REF!	#REF!	#REF!	571.333	FALSE			45.5297	75.146	96
1715	0.668326	1895.36	0.172549	0.294757	0.377749	#REF!	#REF!	#REF!	571.667	FALSE			44	75.163	96.326
1716	0.666325	1901.05	0.172692	0.297482	0.384314	#REF!	#REF!	#REF!	572	TRUE			44.0364	75.858	98
1717	0.664324	1906.78	0.173531	0.294518	0.384949	#REF!	#REF!	#REF!	572.333	FALSE			44.2504	75.102	98.162
1718	0.662323	1912.54	0.173176	0.294957	0.388235	#REF!	#REF!	#REF!	572.667	FALSE			44.1599	75.214	99
1719	0.660322	1918.34	0.171004	0.2972	0.387604	#REF!	#REF!	#REF!	573	TRUE			43.6061	75.786	98.839
1720	0.658321	1924.17	0.170374	0.292173	0.384314	#REF!	#REF!	#REF!	573.333	FALSE			43.4454	74.504	98
1721	0.65632	1930.03	0.166101	0.281753	0.387451	#REF!	#REF!	#REF!	573.667	FALSE			42.3558	71.847	98.8
1722	0.654319	1935.94	0.166739	0.277886	0.403922	#REF!	#REF!	#REF!	574	TRUE			42.5184	70.861	103
1723	0.652318	1941.87	0.169345	0.27409	0.403867	#REF!	#REF!	#REF!	574.333	FALSE			43.183	69.893	102.986
1724	0.650317	1947.85	0.168787	0.272333	0.403376	#REF!	#REF!	#REF!	574.667	FALSE			43.0407	69.445	102.861
1725	0.648316	1953.86	0.166819	0.278741	0.403533	#REF!	#REF!	#REF!	575	TRUE			42.5388	71.079	102.901
1726	0.646315	1959.91	0.165811	0.277196	0.405773	#REF!	#REF!	#REF!	575.333	FALSE			42.2819	70.685	103.472
1727	0.644314	1966	0.160566	0.270412	0.406863	#REF!	#REF!	#REF!	575.667	FALSE			40.9444	68.955	103.75
1728	0.642313	1972.12	0.159969	0.26938	0.410455	#REF!	#REF!	#REF!	576	TRUE			40.7922	68.692	104.666
1729	0.640312	1978.28	0.159085	0.268353	0.41149	#REF!	#REF!	#REF!	576.333	FALSE			40.5666	68.43	104.93
1730	0.638311	1984.49	0.159777	0.259294	0.417918	#REF!	#REF!	#REF!	576.667	FALSE			40.7432	66.12	106.569
1731	0.63631	1990.73	0.163592	0.253035	0.416678	#REF!	#REF!	#REF!	577	TRUE			41.716	64.524	106.253
1732	0.634309	1997.01	0.162253	0.253863	0.410498	#REF!	#REF!	#REF!	577.333	FALSE			41.3746	64.735	104.677
1733	0.632308	2003.33	0.151655	0.254373	0.412455	#REF!	#REF!	#REF!	577.667	FALSE			38.672	64.865	105.176
1734	0.630307	2009.69	0.152725	0.256992	0.425988	#REF!	#REF!	#REF!	578	TRUE			38.9449	65.533	108.627
1735	0.628306	2016.09	0.157942	0.252773	0.425165	#REF!	#REF!	#REF!	578.333	FALSE			40.2753	64.457	108.417
1736	0.626306	2022.53	0.157091	0.248141	0.419271	#REF!	#REF!	#REF!	578.667	FALSE			40.0581	63.276	106.914
1737	0.624305	2029.01	0.152941	0.24818	0.417192	#REF!	#REF!	#REF!	579	TRUE			39	63.286	106.384
1738	0.622304	2035.53	0.152463	0.24818	0.406929	#REF!	#REF!	#REF!	579.333	FALSE			38.878	63.286	103.767
1739	0.620303	2042.1	0.149685	0.241431	0.404271	#REF!	#REF!	#REF!	579.667	FALSE			38.1698	61.565	103.089
1740	0.618302	2048.71	0.150004	0.241333	0.390671	#REF!	#REF!	#REF!	580	TRUE			38.251	61.54	99.621
1741	0.616301	2055.36	0.152482	0.24122	0.390345	#REF!	#REF!	#REF!	580.333	FALSE			38.8829	61.511	99.538
1742	0.6143	2062.05	0.149754	0.241212	0.390231	#REF!	#REF!	#REF!	580.667	FALSE			38.1873	61.509	99.509
1743	0.612299	2068.79	0.133586	0.240447	0.387671	#REF!	#REF!	#REF!	581	TRUE			34.0644	61.314	98.856
1744	0.610298	2075.58	0.135773	0.236004	0.372549	#REF!	#REF!	#REF!	581.333	FALSE			34.6221	60.181	95
1745	0.608297	2082.4	0.148974	0.237478	0.371914	#REF!	#REF!	#REF!	581.667	FALSE			37.9883	60.557	94.838
1746	0.606296	2089.28	0.14786	0.236839	0.368749	#REF!	#REF!	#REF!	582	TRUE			37.7042	60.394	94.031
1747	0.604295	2096.19	0.141176	0.236894	0.367494	#REF!	#REF!	#REF!	582.333	FALSE			36	60.408	93.711
1748	0.602294	2103.16	0.141753	0.237286	0.357941	#REF!	#REF!	#REF!	582.667	FALSE			36.1469	60.508	91.275
1749	0.600293	2110.17	0.145098	0.234035	0.354149	#REF!	#REF!	#REF!	583	TRUE			37	59.679	90.308
1750	0.598292	2117.23	0.145098	0.234133	0.328976	#REF!	#REF!	#REF!	583.333	FALSE			37	59.704	83.889
1751	0.596291	2124.33	0.145098	0.233812	0.329518	#REF!	#REF!	#REF!	583.667	FALSE			37	59.622	84.027
1752	0.59429	2131.48	0.143961	0.231941	0.334302	#REF!	#REF!	#REF!	584	TRUE			36.7101	59.145	85.247
1753	0.592289	2138.69	0.137255	0.235294	0.329988	#REF!	#REF!	#REF!	584.333	FALSE			35	60	84.147
1754	0.590288	2145.93	0.138949	0.235859	0.305102	#REF!	#REF!	#REF!	584.667	FALSE			35.4319	60.144	77.801
1755	0.588287	2153.23	0.14902	0.238753	0.305298	#REF!	#REF!	#REF!	585	TRUE			38	60.882	77.851
1756	0.586286	2160.58	0.147337	0.235322	0.305882	#REF!	#REF!	#REF!	585.333	FALSE			37.571	60.007	78
1757	0.584285	2167.98	0.137255	0.231796	0.303298	#REF!	#REF!	#REF!	585.667	FALSE			35	59.108	77.341
1758	0.582284	2175.43	0.138369	0.231427	0.287463	#REF!	#REF!	#REF!	586	TRUE			35.284	59.014	73.303
1759	0.580283	2182.93	0.145098	0.232227	0.289267	#REF!	#REF!	#REF!	586.333	FALSE			37	59.218	73.763
1760	0.578282	2190.49	0.143992	0.234976	0.301961	#REF!	#REF!	#REF!	586.667	FALSE			36.7179	59.919	77
1761	0.576281	2198.09	0.137255	0.232125	0.301408	#REF!	#REF!	#REF!	587	TRUE			35	59.192	76.859
1762	0.57428	2205.75	0.136705	0.234757	0.298039	#REF!	#REF!	#REF!	587.333	FALSE			34.8599	59.863	76
1763	0.572279	2213.46	0.133333	0.231443	0.295302	#REF!	#REF!	#REF!	587.667	FALSE			34	59.018	75.302
1764	0.570278	2221.23	0.134424	0.230827	0.278431	#REF!	#REF!	#REF!	588	TRUE			34.2782	58.861	71
1765	0.568277	2229.05	0.141176	0.228537	0.278976	#REF!	#REF!	#REF!	588.333	FALSE			36	58.277	71.139
1766	0.566276	2236.93	0.140635	0.235243	0.282353	#REF!	#REF!	#REF!	588.667	FALSE			35.8619	59.987	72
1767	0.564275	2244.86	0.137255	0.233275	0.282353	#REF!	#REF!	#REF!	589	TRUE			35	59.485	72
1768	0.562274	2252.85	0.136717	0.223608	0.282353	#REF!	#REF!	#REF!	589.333	FALSE			34.8629	57.02	72
1769	0.560273	2260.9	0.133333	0.223651	0.283424	#REF!	#REF!	#REF!	589.667	FALSE			34	57.031	72.273
1770	0.558272	2269	0.133333	0.21929	0.290196	#REF!	#REF!	#REF!	590	TRUE			34	55.919	74
1771	0.556271	2277.16	0.133333	0.213145	0.290196	#REF!	#REF!	#REF!	590.333	FALSE			34	54.352	74
1772	0.55427	2285.38	0.132803	0.216502	0.290196	#REF!	#REF!	#REF!	590.667	FALSE			33.8648	55.208	74
1773	0.552269	2293.66	0.129412	0.215545	0.29178	#REF!	#REF!	#REF!	591	TRUE			33	54.964	74.404
1774	0.550268	2302	0.128885	0.214482	0.301961	#REF!	#REF!	#REF!	591.333	FALSE			32.8658	54.693	77
1775	0.548267	2310.4	0.12549	0.213012	0.302486	#REF!	#REF!	#REF!	591.667	FALSE			32	54.318	77.134
1776	0.546266	2318.87	0.12549	0.205071	0.305882	#REF!	#REF!	#REF!	592	TRUE			32	52.293	78
1777	0.544265	2327.39	0.12549	0.204961	0.305361	#REF!	#REF!	#REF!	592.333	FALSE			32	52.265	77.867
1778	0.542265	2335.98	0.126009	0.210929	0.301961	#REF!	#REF!	#REF!	592.667	FALSE			32.1323	53.787	77
1779	0.540264	2344.63	0.129412	0.204502	0.302478	#REF!	#REF!	#REF!	593	TRUE			33	52.148	77.132
1780	0.538263	2353.35	0.128382	0.197855	0.305882	#REF!	#REF!	#REF!	593.333	FALSE			32.7374	50.453	78
1781	0.536262	2362.13	0.121569	0.198196	0.304345	#REF!	#REF!	#REF!	593.667	FALSE			31	50.54	77.608
1782	0.534261	2370.98	0.122591	0.197835	0.294118	#REF!	#REF!	#REF!	594	TRUE			31.2606	50.448	75
1783	0.53226	2379.89	0.129412	0.196078	0.294627	#REF!	#REF!	#REF!	594.333	FALSE			33	50	75.13
1784	0.530259	2388.87	0.128233	0.195063	0.298039	#REF!	#REF!	#REF!	594.667	FALSE			32.6993	49.741	76
1785	0.528258	2397.92	0.121569	0.187729	0.297533	#REF!	#REF!	#REF!	595	TRUE			31	47.871	75.871
1786	0.526257	2407.04	0.120596	0.184525	0.294118	#REF!	#REF!	#REF!	595.333	FALSE			30.7521	47.054	75
1787	0.524256	2416.22	0.114099	0.185553	0.292114	#REF!	#REF!	#REF!	595.667	FALSE			29.0952	47.316	74.489
1788	0.522255	2425.48	0.114202	0.183549	0.278431	#REF!	#REF!	#REF!	596	TRUE			29.1215	46.805	71
1789	0.520254	2434.81	0.114305	0.1862	0.276937	#REF!	#REF!	#REF!	596.333	FALSE			29.1479	47.481	70.619
1790	0.518253	2444.21	0.114732	0.190227	0.266667	#REF!	#REF!	#REF!	596.667	FALSE			29.2566	48.508	68
1791	0.516252	2453.69	0.11686	0.18498	0.26469	#REF!	#REF!	#REF!	597	TRUE			29.7994	47.17	67.496
1792	0.514251	2463.23	0.116489	0.182173	0.25098	#REF!	#REF!	#REF!	597.333	FALSE			29.7046	46.454	64
1793	0.51225	2472.85	0.114719	0.186776	0.252941	#REF!	#REF!	#REF!	597.667	FALSE			29.2533	47.628	64.5
1794	0.510249	2482.55	0.114198	0.183063	0.266667	#REF!	#REF!	#REF!	598	TRUE			29.1204	46.681	68
1795	0.508248	2492.33	0.109804	0.180878	0.264235	#REF!	#REF!	#REF!	598.333	FALSE			28	46.124	67.38
1796	0.506247	2502.18	0.109802	0.183514	0.247059	#REF!	#REF!	#REF!	598.667	FALSE			27.9996	46.796	63
1797	0.504246	2512.11	0.110102	0.177161	0.245612	#REF!	#REF!	#REF!	599	TRUE			28.0761	45.176	62.631
1798	0.502245	2522.11	0.110153	0.17431	0.235294	#REF!	#REF!	#REF!	599.333	FALSE			28.089	44.449	60
1799	0.500244	2532.2	0.108191	0.180475	0.237686	#REF!	#REF!	#REF!	599.667	FALSE			27.5886	46.021	60.61
1800	0.498243	2542.37	0.108296	0.183537	0.254902	#REF!	#REF!	#REF!	600	TRUE			27.6154	46.802	65
1801	0.496242	2552.62	0.109804	0.180188	0.25158	#REF!	#REF!	#REF!	600.333	FALSE			28	45.948	64.153
1802	0.494241	2562.96	0.110276	0.180286	0.227451	#REF!	#REF!	#REF!	600.667	FALSE			28.1205	45.973	58
1803	0.49224	2573.38	0.113725	0.18038	0.227451	#REF!	#REF!	#REF!	601	TRUE			29	45.997	58
1804	0.490239	2583.88	0.113256	0.179369	0.227702	#REF!	#REF!	#REF!	601.333	FALSE			28.8804	45.739	58.064
1805	0.488238	2594.47	0.109804	0.172392	0.227016	#REF!	#REF!	#REF!	601.667	FALSE			28	43.96	57.889
1806	0.486237	2605.15	0.109804	0.172549	0.219882	#REF!	#REF!	#REF!	602	TRUE			28	44	56.07
1807	0.484236	2615.91	0.109804	0.172129	0.221282	#REF!	#REF!	#REF!	602.333	FALSE			28	43.893	56.427
1808	0.482235	2626.77	0.109343	0.169557	0.230906	#REF!	#REF!	#REF!	602.667	FALSE			27.8824	43.237	58.881
1809	0.480234	2637.71	0.105882	0.173176	0.231204	#REF!	#REF!	#REF!	603	TRUE			27	44.16	58.957
1810	0.478233	2648.75	0.106019	0.173408	0.234663	#REF!	#REF!	#REF!	603.333	FALSE			27.0348	44.219	59.839
1811	0.476232	2659.88	0.10695	0.169961	0.233863	#REF!	#REF!	#REF!	603.667	FALSE			27.2723	43.34	59.635
1812	0.474231	2671.1	0.106282	0.168627	0.224706	#REF!	#REF!	#REF!	604	TRUE			27.1019	43	57.3
1813	0.47223	2682.42	0.101961	0.168176	0.226216	#REF!	#REF!	#REF!	604.333	FALSE			26	42.885	57.685
1814	0.470229	2693.83	0.1017	0.163808	0.233212	#REF!	#REF!	#REF!	604.667	FALSE			25.9335	41.771	59.469
1815	0.468228	2705.35	0.0999973	0.156992	0.232761	#REF!	#REF!	#REF!	605	TRUE			25.4993	40.033	59.354
1816	0.466227	2716.96	0.100433	0.157957	0.230365	#REF!	#REF!	#REF!	605.333	FALSE			25.6103	40.279	58.743
1817	0.464226	2728.67	0.101513	0.156863	0.23102	#REF!	#REF!	#REF!	605.667	FALSE			25.8858	40	58.91
1818	0.462225	2740.48	0.10081	0.156863	0.238867	#REF!	#REF!	#REF!	606	TRUE			25.7065	40	60.911
1819	0.460224	2752.39	0.0943588	0.155984	0.236278	#REF!	#REF!	#REF!	606.333	FALSE			24.0615	39.776	60.251
1820	0.458224	2764.41	0.0946475	0.14858	0.217992	#REF!	#REF!	#REF!	606.667	FALSE			24.1351	37.888	55.588
1821	0.456223	2776.54	0.0979702	0.145533	0.217706	#REF!	#REF!	#REF!	607	TRUE			24.9824	37.111	55.515
1822	0.454222	2788.77	0.0980392	0.14902	0.215996	#REF!	#REF!	#REF!	607.333	FALSE			25	38	55.079
1823	0.452221	2801.11	0.0980392	0.148588	0.214494	#REF!	#REF!	#REF!	607.667	FALSE			25	37.89	54.696
1824	0.45022	2813.56	0.0976086	0.145098	0.203922	#REF!	#REF!	#REF!	608	TRUE			24.8902	37	52
1825	0.448219	2826.12	0.0941176	0.145325	0.203094	#REF!	#REF!	#REF!	608.333	FALSE			24	37.058	51.789
1826	0.446218	2838.79	0.0941176	0.146859	0.196537	#REF!	#REF!	#REF!	608.667	FALSE			24	37.449	50.117
1827	0.444217	2851.58	0.0941176	0.143463	0.195914	#REF!	#REF!	#REF!	609	TRUE			24	36.583	49.958
1828	0.442216	2864.48	0.0936945	0.143302	0.188937	#REF!	#REF!	#REF!	609.333	FALSE			23.8921	36.542	48.179
1829	0.440215	2877.5	0.0901961	0.14049	0.188294	#REF!	#REF!	#REF!	609.667	FALSE			23	35.825	48.015
1830	0.438214	2890.64	0.0914533	0.135102	0.185537	#REF!	#REF!	#REF!	610	TRUE			23.3206	34.451	47.312
1831	0.436213	2903.9	0.101961	0.138376	0.184761	#REF!	#REF!	#REF!	610.333	FALSE			26	35.286	47.114
1832	0.434212	2917.28	0.10113	0.137133	0.176918	#REF!	#REF!	#REF!	610.667	FALSE			25.7882	34.969	45.114
1833	0.432211	2930.79	0.0941176	0.136306	0.178635	#REF!	#REF!	#REF!	611	TRUE			24	34.758	45.552
1834	0.43021	2944.42	0.0928831	0.137667	0.191247	#REF!	#REF!	#REF!	611.333	FALSE			23.6852	35.105	48.768
1835	0.428209	2958.18	0.0823529	0.141176	0.190176	#REF!	#REF!	#REF!	611.667	FALSE			21	36	48.495
1836	0.426208	2972.07	0.0831682	0.141094	0.17729	#REF!	#REF!	#REF!	612	TRUE			21.2079	35.979	45.209
1837	0.424207	2986.09	0.0901961	0.139827	0.177216	#REF!	#REF!	#REF!	612.333	FALSE			23	35.656	45.19
1838	0.422206	3000.24	0.0901961	0.133514	0.173133	#REF!	#REF!	#REF!	612.667	FALSE			23	34.046	44.149
1839	0.420205	3014.53	0.0901961	0.130251	0.172333	#REF!	#REF!	#REF!	613	TRUE			23	33.214	43.945
1840	0.418204	3028.95	0.0901961	0.132973	0.165882	#REF!	#REF!	#REF!	613.333	FALSE			23	33.908	42.3
1841	0.416203	3043.51	0.0901961	0.129678	0.167467	#REF!	#REF!	#REF!	613.667	FALSE			23	33.068	42.704
1842	0.414202	3058.22	0.0894039	0.129392	0.184114	#REF!	#REF!	#REF!	614	TRUE			22.798	32.995	46.949
1843	0.412201	3073.06	0.0823529	0.128922	0.183824	#REF!	#REF!	#REF!	614.333	FALSE			21	32.875	46.875
1844	0.4102	3088.05	0.0831376	0.12549	0.180392	#REF!	#REF!	#REF!	614.667	FALSE			21.2001	32	46
1845	0.408199	3103.19	0.0901961	0.125412	0.180392	#REF!	#REF!	#REF!	615	TRUE			23	31.98	46
1846	0.406198	3118.48	0.0894192	0.12549	0.180392	#REF!	#REF!	#REF!	615.333	FALSE			22.8019	32	46
1847	0.404197	3133.91	0.0823529	0.125102	0.17962	#REF!	#REF!	#REF!	615.667	FALSE			21	31.901	45.803
1848	0.402196	3149.51	0.0815835	0.121918	0.172549	#REF!	#REF!	#REF!	616	TRUE			20.8038	31.089	44
1849	0.400195	3165.25	0.0745098	0.124639	0.172165	#REF!	#REF!	#REF!	616.333	FALSE			19	31.783	43.902
1850	0.398194	3181.16	0.0752714	0.120733	0.168627	#REF!	#REF!	#REF!	616.667	FALSE			19.1942	30.787	43
1851	0.396193	3197.23	0.0823529	0.118306	0.16749	#REF!	#REF!	#REF!	617	TRUE			21	30.168	42.71
1852	0.394192	3213.46	0.0819761	0.118259	0.156863	#REF!	#REF!	#REF!	617.333	FALSE			20.9039	30.156	40
1853	0.392191	3229.85	0.0784314	0.116502	0.156114	#REF!	#REF!	#REF!	617.667	FALSE			20	29.708	39.809
1854	0.39019	3246.41	0.0784314	0.113725	0.14902	#REF!	#REF!	#REF!	618	TRUE			20	29	38
1855	0.388189	3263.15	0.0784314	0.113725	0.14902	#REF!	#REF!	#REF!	618.333	FALSE			20	29	38
1856	0.386188	3280.06	0.0784314	0.114094	0.14902	#REF!	#REF!	#REF!	618.667	FALSE			20	29.094	38
1857	0.384187	3297.14	0.0784314	0.117396	0.148286	#REF!	#REF!	#REF!	619	TRUE			20	29.936	37.813
1858	0.382186	3314.4	0.0780659	0.115055	0.141176	#REF!	#REF!	#REF!	619.333	FALSE			19.9068	29.339	36
1859	0.380185	3331.85	0.0745098	0.115153	0.141541	#REF!	#REF!	#REF!	619.667	FALSE			19	29.364	36.093
1860	0.378184	3349.48	0.0745235	0.114886	0.145098	#REF!	#REF!	#REF!	620	TRUE			19.0035	29.296	37
1861	0.376184	3367.29	0.0748659	0.111275	0.14582	#REF!	#REF!	#REF!	620.333	FALSE			19.0908	28.375	37.184
1862	0.374183	3385.3	0.0746631	0.109804	0.152941	#REF!	#REF!	#REF!	620.667	FALSE			19.0391	28	39
1863	0.372182	3403.5	0.0705882	0.109447	0.151875	#REF!	#REF!	#REF!	621	TRUE			18	27.909	38.728
1864	0.370181	3421.9	0.0709424	0.105882	0.141176	#REF!	#REF!	#REF!	621.333	FALSE			18.0903	27	36
1865	0.36818	3440.49	0.0745098	0.106235	0.141176	#REF!	#REF!	#REF!	621.667	FALSE			19	27.09	36
1866	0.366179	3459.29	0.0742835	0.109827	0.141176	#REF!	#REF!	#REF!	622	TRUE			18.9423	28.006	36
1867	0.364178	3478.3	0.0721843	0.109918	0.141875	#REF!	#REF!	#REF!	622.333	FALSE			18.407	28.029	36.178
1868	0.362177	3497.52	0.0721522	0.106129	0.14902	#REF!	#REF!	#REF!	622.667	FALSE			18.3988	27.063	38
1869	0.360176	3516.95	0.0695835	0.102306	0.147984	#REF!	#REF!	#REF!	623	TRUE			17.7438	26.088	37.736
1870	0.358175	3536.6	0.0699196	0.106098	0.137255	#REF!	#REF!	#REF!	623.333	FALSE			17.8295	27.055	35
1871	0.356174	3556.47	0.0745098	0.108231	0.136231	#REF!	#REF!	#REF!	623.667	FALSE			19	27.599	34.739
1872	0.354173	3576.56	0.0742847	0.105651	0.12549	#REF!	#REF!	#REF!	624	TRUE			18.9426	26.941	32
1873	0.352172	3596.88	0.0720063	0.103016	0.126165	#REF!	#REF!	#REF!	624.333	FALSE			18.3616	26.269	32.172
1874	0.350171	3617.43	0.0718498	0.101871	0.133333	#REF!	#REF!	#REF!	624.667	FALSE			18.3217	25.977	34
1875	0.34817	3638.22	0.0689635	0.100996	0.133667	#REF!	#REF!	#REF!	625	TRUE			17.5857	25.754	34.085
1876	0.346169	3659.25	0.0690451	0.10109	0.137255	#REF!	#REF!	#REF!	625.333	FALSE			17.6065	25.778	35
1877	0.344168	3680.53	0.0708467	0.101188	0.135937	#REF!	#REF!	#REF!	625.667	FALSE			18.0659	25.803	34.664
1878	0.342167	3702.05	0.0703039	0.100957	0.121569	#REF!	#REF!	#REF!	626	TRUE			17.9275	25.744	31
1879	0.340166	3723.83	0.0668216	0.0974588	0.121894	#REF!	#REF!	#REF!	626.333	FALSE			17.0395	24.852	31.083
1880	0.338165	3745.86	0.0670282	0.0972706	0.12549	#REF!	#REF!	#REF!	626.667	FALSE			17.0922	24.804	32
1881	0.336164	3768.16	0.0672349	0.0937961	0.125169	#REF!	#REF!	#REF!	627	TRUE			17.1449	23.918	31.918
1882	0.334163	3790.72	0.0669957	0.089902	0.121569	#REF!	#REF!	#REF!	627.333	FALSE			17.0839	22.925	31
1883	0.332162	3813.56	0.0617631	0.0867922	0.121251	#REF!	#REF!	#REF!	627.667	FALSE			15.7496	22.132	30.919
1884	0.330161	3836.67	0.0616522	0.0906078	0.117647	#REF!	#REF!	#REF!	628	TRUE			15.7213	23.105	30
1885	0.32816	3860.07	0.0627451	0.0941176	0.117961	#REF!	#REF!	#REF!	628.333	FALSE			16	24	30.08
1886	0.326159	3883.75	0.0626176	0.0943412	0.121392	#REF!	#REF!	#REF!	628.667	FALSE			15.9675	24.057	30.955
1887	0.324158	3907.72	0.0609365	0.0978549	0.121216	#REF!	#REF!	#REF!	629	TRUE			15.5388	24.953	30.91
1888	0.322157	3931.99	0.0609631	0.097451	0.12129	#REF!	#REF!	#REF!	629.333	FALSE			15.5456	24.85	30.929
1889	0.320156	3956.57	0.0635949	0.0934353	0.120553	#REF!	#REF!	#REF!	629.667	FALSE			16.2167	23.826	30.741
1890	0.318155	3981.45	0.0631294	0.0894588	0.112784	#REF!	#REF!	#REF!	630	TRUE			16.098	22.812	28.76
1891	0.316154	4006.65	0.0588235	0.0862745	0.112678	#REF!	#REF!	#REF!	630.333	FALSE			15	22	28.733
1892	0.314153	4032.17	0.0589063	0.0862745	0.113725	#REF!	#REF!	#REF!	630.667	FALSE			15.0211	22	29
1893	0.312152	4058.02	0.0596961	0.0865137	0.113725	#REF!	#REF!	#REF!	631	TRUE			15.2225	22.061	29
1894	0.310151	4084.2	0.0591929	0.0890471	0.113725	#REF!	#REF!	#REF!	631.333	FALSE			15.0942	22.707	29
1895	0.30815	4110.72	0.0553612	0.0848784	0.113286	#REF!	#REF!	#REF!	631.667	FALSE			14.1171	21.644	28.888
1896	0.306149	4137.59	0.0551545	0.0796902	0.107714	#REF!	#REF!	#REF!	632	TRUE			14.0644	20.321	27.467
1897	0.304148	4164.81	0.0549478	0.0823529	0.107439	#REF!	#REF!	#REF!	632.333	FALSE			14.0117	21	27.397
1898	0.302147	4192.39	0.055191	0.0823529	0.106094	#REF!	#REF!	#REF!	632.667	FALSE			14.0737	21	27.054
1899	0.300146	4220.34	0.0588235	0.0823529	0.105714	#REF!	#REF!	#REF!	633	TRUE			15	21	26.957
1900	0.298145	4248.66	0.0588235	0.0825333	0.104455	#REF!	#REF!	#REF!	633.333	FALSE			15	21.046	26.636
1901	0.296144	4277.37	0.0588235	0.0845765	0.104137	#REF!	#REF!	#REF!	633.667	FALSE			15	21.567	26.555
1902	0.294143	4306.47	0.0591047	0.0820706	0.101024	#REF!	#REF!	#REF!	634	TRUE			15.0717	20.928	25.761
1903	0.292143	4335.96	0.0627451	0.0785882	0.10058	#REF!	#REF!	#REF!	634.333	FALSE			16	20.04	25.648
1904	0.290142	4365.87	0.0624675	0.0805412	0.0983412	#REF!	#REF!	#REF!	634.667	FALSE			15.9292	20.538	25.077
1905	0.288141	4396.19	0.0588235	0.0800314	0.0985647	#REF!	#REF!	#REF!	635	TRUE			15	20.408	25.134
1906	0.28614	4426.93	0.0585498	0.0743686	0.1038	#REF!	#REF!	#REF!	635.333	FALSE			14.9302	18.964	26.469
1907	0.284139	4458.1	0.054902	0.0726824	0.103259	#REF!	#REF!	#REF!	635.667	FALSE			14	18.534	26.331
1908	0.282138	4489.72	0.0551718	0.0762392	0.0997686	#REF!	#REF!	#REF!	636	TRUE			14.0688	19.441	25.441
1909	0.280137	4521.79	0.0588235	0.0760314	0.0997176	#REF!	#REF!	#REF!	636.333	FALSE			15	19.388	25.428
1910	0.278136	4554.32	0.0582914	0.0747765	0.100424	#REF!	#REF!	#REF!	636.667	FALSE			14.8643	19.068	25.608
1911	0.276135	4587.32	0.0509804	0.0784314	0.100353	#REF!	#REF!	#REF!	637	TRUE			13	20	25.59
1912	0.274134	4620.81	0.0512427	0.0784314	0.0980392	#REF!	#REF!	#REF!	637.333	FALSE			13.0669	20	25
1913	0.272133	4654.79	0.054902	0.078349	0.0976	#REF!	#REF!	#REF!	637.667	FALSE			14	19.979	24.888
1914	0.270132	4689.27	0.0554188	0.0772784	0.091349	#REF!	#REF!	#REF!	638	TRUE			14.1318	19.706	23.294
1915	0.268131	4724.26	0.0627451	0.0774431	0.0912549	#REF!	#REF!	#REF!	638.333	FALSE			16	19.748	23.27
1916	0.26613	4759.78	0.0619816	0.0781765	0.0911569	#REF!	#REF!	#REF!	638.667	FALSE			15.8053	19.935	23.245
1917	0.264129	4795.84	0.0509804	0.0742588	0.0915686	#REF!	#REF!	#REF!	639	TRUE			13	18.936	23.35
1918	0.262128	4832.45	0.051231	0.0708392	0.0988118	#REF!	#REF!	#REF!	639.333	FALSE			13.0639	18.064	25.197
1919	0.260127	4869.62	0.054902	0.074302	0.0986275	#REF!	#REF!	#REF!	639.667	FALSE			14	18.947	25.15
1920	0.258126	4907.37	0.055149	0.0711686	0.0974588	#REF!	#REF!	#REF!	640	TRUE			14.063	18.148	24.852
1921	0.256125	4945.71	0.0588235	0.0712863	0.0972784	#REF!	#REF!	#REF!	640.333	FALSE			15	18.178	24.806
1922	0.254124	4984.65	0.0583373	0.0745098	0.0933412	#REF!	#REF!	#REF!	640.667	FALSE			14.876	19	23.802
1923	0.252123	5024.21	0.0509804	0.0745294	0.0935843	#REF!	#REF!	#REF!	641	TRUE			13	19.005	23.864
1924	0.250122	5064.41	0.0507412	0.0747059	0.0943137	#REF!	#REF!	#REF!	641.333	FALSE			12.939	19.05	24.05
1925	0.248121	5105.25	0.0470588	0.0746039	0.0944549	#REF!	#REF!	#REF!	641.667	FALSE			12	19.024	24.086
1926	0.24612	5146.75	0.0472941	0.0745098	0.0980431	#REF!	#REF!	#REF!	642	TRUE			12.06	19	25.001
1927	0.244119	5188.94	0.0509804	0.0744196	0.0975725	#REF!	#REF!	#REF!	642.333	FALSE			13	18.977	24.881
1928	0.242118	5231.82	0.0512122	0.0743333	0.0901961	#REF!	#REF!	#REF!	642.667	FALSE			13.0591	18.955	23
1929	0.240117	5275.42	0.054902	0.0742784	0.0904275	#REF!	#REF!	#REF!	643	TRUE			14	18.941	23.059
1930	0.238116	5319.75	0.054902	0.0705882	0.0941176	#REF!	#REF!	#REF!	643.333	FALSE			14	18	24
1931	0.236115	5364.84	0.054902	0.0708157	0.0945686	#REF!	#REF!	#REF!	643.667	FALSE			14	18.058	24.115
1932	0.234114	5410.69	0.054678	0.0742863	0.101961	#REF!	#REF!	#REF!	644	TRUE			13.9429	18.943	26
1933	0.232113	5457.33	0.0509804	0.0705882	0.101518	#REF!	#REF!	#REF!	644.333	FALSE			13	18	25.887
1934	0.230112	5504.79	0.0507604	0.0708078	0.0941176	#REF!	#REF!	#REF!	644.667	FALSE			12.9439	18.056	24
1935	0.228111	5553.08	0.0470588	0.0742902	0.0943373	#REF!	#REF!	#REF!	645	TRUE			12	18.944	24.056
1936	0.22611	5602.22	0.0475678	0.0707529	0.0980392	#REF!	#REF!	#REF!	645.333	FALSE			12.1298	18.042	25
1937	0.224109	5652.24	0.0547125	0.0733059	0.0973961	#REF!	#REF!	#REF!	645.667	FALSE			13.9517	18.693	24.836
1938	0.222108	5703.16	0.0545933	0.0705882	0.0862745	#REF!	#REF!	#REF!	646	TRUE			13.9213	18	22
1939	0.220107	5755.01	0.0541094	0.0705882	0.0866941	#REF!	#REF!	#REF!	646.333	FALSE			13.7979	18	22.107
1940	0.218106	5807.81	0.0539027	0.0705176	0.0941176	#REF!	#REF!	#REF!	646.667	FALSE			13.7452	17.982	24
1941	0.216105	5861.58	0.0536961	0.0693647	0.0941176	#REF!	#REF!	#REF!	647	TRUE			13.6925	17.688	24
1942	0.214104	5916.36	0.0533584	0.0729373	0.0941176	#REF!	#REF!	#REF!	647.333	FALSE			13.6064	18.599	24
1943	0.212103	5972.18	0.0509804	0.0721255	0.0945216	#REF!	#REF!	#REF!	647.667	FALSE			13	18.392	24.103
1944	0.210102	6029.06	0.0508263	0.0705882	0.101961	#REF!	#REF!	#REF!	648	TRUE			12.9607	18	26
1945	0.208102	6087.03	0.0480753	0.0705882	0.101761	#REF!	#REF!	#REF!	648.333	FALSE			12.2592	18	25.949
1946	0.206101	6146.12	0.0483192	0.0706902	0.0980392	#REF!	#REF!	#REF!	648.667	FALSE			12.3214	18.026	25
1947	0.2041	6206.38	0.0509804	0.0725059	0.0972588	#REF!	#REF!	#REF!	649	TRUE			13	18.489	24.801
1948	0.202099	6267.83	0.0505937	0.0724118	0.0823529	#REF!	#REF!	#REF!	649.333	FALSE			12.9014	18.465	21
1949	0.200098	6330.51	0.0431373	0.0723137	0.0827373	#REF!	#REF!	#REF!	649.667	FALSE			11	18.44	21.098
1950	0.198097	6394.45	0.0434008	0.0723294	0.0901961	#REF!	#REF!	#REF!	650	TRUE			11.0672	18.444	23
1951	0.196096	6459.7	0.0486953	0.0745098	0.0901961	#REF!	#REF!	#REF!	650.333	FALSE			12.4173	19	23
1952	0.194095	6526.3	0.0487984	0.0743922	0.0901961	#REF!	#REF!	#REF!	650.667	FALSE			12.4436	18.97	23
1953	0.192094	6594.28	0.048902	0.071749	0.090749	#REF!	#REF!	#REF!	651	TRUE			12.47	18.296	23.141
1954	0.190093	6663.69	0.0489149	0.0682196	0.101961	#REF!	#REF!	#REF!	651.333	FALSE			12.4733	17.396	26
1955	0.188092	6734.58	0.0470588	0.0746902	0.101961	#REF!	#REF!	#REF!	651.667	FALSE			12	19.046	26
1956	0.186091	6807	0.0471565	0.0782549	0.101961	#REF!	#REF!	#REF!	652	TRUE			12.0249	19.955	26
1957	0.18409	6880.99	0.0493153	0.0743333	0.101608	#REF!	#REF!	#REF!	652.333	FALSE			12.5754	18.955	25.91
1958	0.182089	6956.6	0.0494188	0.0708	0.0941176	#REF!	#REF!	#REF!	652.667	FALSE			12.6018	18.054	24
1959	0.180088	7033.9	0.049522	0.0751059	0.0944627	#REF!	#REF!	#REF!	653	TRUE			12.6281	19.152	24.088
1960	0.178087	7112.93	0.0495725	0.0712314	0.101961	#REF!	#REF!	#REF!	653.333	FALSE			12.641	18.164	26
1961	0.176086	7193.76	0.0483106	0.0707569	0.101961	#REF!	#REF!	#REF!	653.667	FALSE			12.3192	18.043	26
1962	0.174085	7276.45	0.0482071	0.0746549	0.101961	#REF!	#REF!	#REF!	654	TRUE			12.2928	19.037	26
1963	0.172084	7361.06	0.0481039	0.0778784	0.101961	#REF!	#REF!	#REF!	654.333	FALSE			12.2665	19.859	26
1964	0.170083	7447.66	0.0482024	0.0742431	0.101961	#REF!	#REF!	#REF!	654.667	FALSE			12.2916	18.932	26
1965	0.168082	7536.32	0.0526569	0.0747059	0.1018	#REF!	#REF!	#REF!	655	TRUE			13.4275	19.05	25.959
1966	0.166081	7627.12	0.0523906	0.0746078	0.0980392	#REF!	#REF!	#REF!	655.333	FALSE			13.3596	19.025	25
1967	0.16408	7720.13	0.0509804	0.0745137	0.0980392	#REF!	#REF!	#REF!	655.667	FALSE			13	19.001	25
1968	0.162079	7815.44	0.0509596	0.0745098	0.0982235	#REF!	#REF!	#REF!	656	TRUE			12.9947	19	25.047
1969	0.160078	7913.14	0.0505557	0.0746627	0.0986824	#REF!	#REF!	#REF!	656.333	FALSE			12.8917	19.039	25.164
1970	0.158077	8013.3	0.0508224	0.0784314	0.105031	#REF!	#REF!	#REF!	656.667	FALSE			12.9597	20	26.783
1971	0.156076	8116.04	0.054902	0.078298	0.104773	#REF!	#REF!	#REF!	657	TRUE			14	19.966	26.717
1972	0.154075	8221.44	0.0547588	0.0749647	0.105408	#REF!	#REF!	#REF!	657.333	FALSE			13.9635	19.116	26.879
1973	0.152074	8329.62	0.0509918	0.0746353	0.104937	#REF!	#REF!	#REF!	657.667	FALSE			13.0029	19.032	26.759
1974	0.150073	8440.68	0.0509804	0.0776471	0.095451	#REF!	#REF!	#REF!	658	TRUE			13	19.8	24.34
1975	0.148072	8554.74	0.0509804	0.0745373	0.0961843	#REF!	#REF!	#REF!	658.333	FALSE			13	19.007	24.527
1976	0.146071	8671.93	0.0508408	0.0755059	0.110294	#REF!	#REF!	#REF!	658.667	FALSE			12.9644	19.254	28.125
1977	0.14407	8792.37	0.0470588	0.0794549	0.109671	#REF!	#REF!	#REF!	659	TRUE			12	20.261	27.966
1978	0.142069	8916.21	0.0476024	0.0811686	0.102737	#REF!	#REF!	#REF!	659.333	FALSE			12.1386	20.698	26.198
1979	0.140068	9043.58	0.0627451	0.0772314	0.102584	#REF!	#REF!	#REF!	659.667	FALSE			16	19.694	26.159
1980	0.138067	9174.65	0.062349	0.075749	0.106082	#REF!	#REF!	#REF!	660	TRUE			15.899	19.316	27.051
1981	0.136066	9309.57	0.0509804	0.0758863	0.106012	#REF!	#REF!	#REF!	660.333	FALSE			13	19.351	27.033
1982	0.134065	9448.52	0.0508522	0.077	0.111922	#REF!	#REF!	#REF!	660.667	FALSE			12.9673	19.635	28.54
1983	0.132064	9591.68	0.0470588	0.0770314	0.111553	#REF!	#REF!	#REF!	661	TRUE			12	19.643	28.446
1984	0.130063	9739.24	0.0471831	0.0807294	0.112373	#REF!	#REF!	#REF!	661.333	FALSE			12.0317	20.586	28.655
1985	0.128062	9891.42	0.0509804	0.0806353	0.112643	#REF!	#REF!	#REF!	661.667	FALSE			13	20.562	28.724
1986	0.126061	10048.4	0.0512216	0.0805373	0.108576	#REF!	#REF!	#REF!	662	TRUE			13.0615	20.537	27.687
1987	0.124061	10210.5	0.0588235	0.0805608	0.108031	#REF!	#REF!	#REF!	662.333	FALSE			15	20.543	27.548
1988	0.12206	10377.9	0.0587067	0.0842706	0.105792	#REF!	#REF!	#REF!	662.667	FALSE			14.9702	21.489	26.977
1989	0.120059	10550.8	0.054902	0.0841725	0.105839	#REF!	#REF!	#REF!	663	TRUE			14	21.464	26.989
1990	0.118058	10729.7	0.054902	0.0840784	0.113725	#REF!	#REF!	#REF!	663.333	FALSE			14	21.44	29
1991	0.116057	10914.7	0.054902	0.0839373	0.113773	#REF!	#REF!	#REF!	663.667	FALSE			14	21.404	29.012
1992	0.114056	11106.2	0.054902	0.0824627	0.115259	#REF!	#REF!	#REF!	664	TRUE			14	21.028	29.391
1993	0.112055	11304.5	0.054902	0.0862745	0.115067	#REF!	#REF!	#REF!	664.333	FALSE			14	22	29.342
1994	0.110054	11510	0.0550071	0.0862745	0.111247	#REF!	#REF!	#REF!	664.667	FALSE			14.0268	22	28.368
1995	0.108053	11723.2	0.0588235	0.0863451	0.110871	#REF!	#REF!	#REF!	665	TRUE			15	22.018	28.272
1996	0.106052	11944.4	0.0589251	0.089149	0.110953	#REF!	#REF!	#REF!	665.333	FALSE			15.0259	22.733	28.293
1997	0.104051	12174.1	0.0627451	0.0930157	0.111059	#REF!	#REF!	#REF!	665.667	FALSE			16	23.719	28.32
[truncated: 52 more rows]

## Sheet: RGB Analysis
Distance	x	h	Blue	Green	Red								Blue	Green	Red
Pixel	mm	nm	normalized	normalized	normalized	#REF!	#REF!	#REF!					ImageJ raw	ImageJ raw	ImageJ raw
0	4.1	308.956	0.0235294	0.0196078	0.027451	#REF!	#REF!	#REF!					6	5	7
1	4.098	309.107	0.0235294	0.019702	0.0238196	#REF!	#REF!	#REF!					6	5.024	6.074
2	4.096	309.258	0.0235294	0.0199922	0.024102	#REF!	#REF!	#REF!					6	5.098	6.146
3	4.094	309.409	0.0235294	0.0201804	0.0221961	#REF!	#REF!	#REF!					6	5.146	5.66
4	4.092	309.56	0.0313573	0.0246706	0.023051	#REF!	#REF!	#REF!					7.9961	6.291	5.878
5	4.09	309.712	0.0313725	0.0293529	0.0267765	#REF!	#REF!	#REF!					8	7.485	6.828
6	4.08799	309.863	0.0235525	0.0336588	0.0282196	#REF!	#REF!	#REF!					6.0059	8.583	7.196
7	4.08599	310.015	0.0235294	0.0406314	0.0401412	#REF!	#REF!	#REF!					6	10.361	10.236
8	4.08399	310.167	0.0196231	0.0492314	0.0419961	#REF!	#REF!	#REF!					5.0039	12.554	10.709
9	4.08199	310.319	0.0196078	0.0526	0.0589569	#REF!	#REF!	#REF!					5	13.413	15.034
10	4.07999	310.471	0.0235102	0.0614667	0.0612235	#REF!	#REF!	#REF!					5.9951	15.674	15.612
11	4.07799	310.624	0.0235294	0.0724549	0.0772235	#REF!	#REF!	#REF!					6	18.476	19.692
12	4.07599	310.776	0.0235294	0.0893451	0.0796902	#REF!	#REF!	#REF!					6	22.783	20.321
13	4.07399	310.929	0.0235294	0.0995216	0.091298	#REF!	#REF!	#REF!					6	25.378	23.281
14	4.07199	311.081	0.0235294	0.115455	0.0935569	#REF!	#REF!	#REF!					6	29.441	23.857
15	4.06999	311.234	0.0235294	0.134843	0.124816	#REF!	#REF!	#REF!					6	34.385	31.828
16	4.06798	311.388	0.0157475	0.148851	0.127616	#REF!	#REF!	#REF!					4.0156	37.957	32.542
17	4.06598	311.541	0.0156863	0.166988	0.224518	#REF!	#REF!	#REF!					4	42.582	57.252
18	4.06398	311.694	0.0195733	0.181459	0.232102	#REF!	#REF!	#REF!					4.9912	46.272	59.186
19	4.06198	311.848	0.0196078	0.164427	0.335675	#REF!	#REF!	#REF!					5	41.929	85.597
20	4.05998	312.001	0.0157247	0.134804	0.346243	#REF!	#REF!	#REF!					4.0098	34.375	88.292
21	4.05798	312.155	0.0156863	0.0946431	0.209302	#REF!	#REF!	#REF!					4	24.134	53.372
22	4.05598	312.309	0.0234451	0.0633725	0.211518	#REF!	#REF!	#REF!					5.9785	16.16	53.937
23	4.05398	312.463	0.0235294	0.0411882	0.0695608	#REF!	#REF!	#REF!					6	10.503	17.738
24	4.05198	312.618	0.015778	0.0292118	0.0676196	#REF!	#REF!	#REF!					4.0234	7.449	17.243
25	4.04998	312.772	0.0156863	0.0274706	0.0285961	#REF!	#REF!	#REF!					4	7.005	7.292
26	4.04797	312.927	0.019558	0.0235804	0.0278314	#REF!	#REF!	#REF!					4.9873	6.013	7.097
27	4.04597	313.082	0.0196078	0.0209804	0.0235804	#REF!	#REF!	#REF!					5	5.35	6.013
28	4.04397	313.236	0.0196078	0.0196235	0.0235294	#REF!	#REF!	#REF!					5	5.004	6
29	4.04197	313.391	0.0196078	0.0196078	0.0207922	#REF!	#REF!	#REF!					5	5	5.302
30	4.03997	313.547	0.0234722	0.0157451	0.0206588	#REF!	#REF!	#REF!					5.9854	4.015	5.268
31	4.03797	313.702	0.0235294	0.0156863	0.0137804	#REF!	#REF!	#REF!					6	4	3.514
32	4.03597	313.858	0.0235294	0.0195451	0.0134824	#REF!	#REF!	#REF!					6	4.984	3.438
33	4.03397	314.013	0.0235294	0.0188549	0.0195059	#REF!	#REF!	#REF!					6	4.808	4.974
34	4.03197	314.169	0.0235294	0.0157412	0.0196078	#REF!	#REF!	#REF!					6	4.014	5
35	4.02997	314.325	0.0235294	0.0118314	0.0151922	#REF!	#REF!	#REF!					6	3.017	3.874
36	4.02796	314.481	0.0235294	0.0117647	0.0152078	#REF!	#REF!	#REF!					6	3	3.878
37	4.02596	314.638	0.0235294	0.0117647	0.00835294	#REF!	#REF!	#REF!					6	3	2.13
38	4.02396	314.794	0.0235239	0.0156118	0.00812941	#REF!	#REF!	#REF!					5.9986	3.981	2.073
39	4.02196	314.951	0.0234204	0.0195333	0.0118784	#REF!	#REF!	#REF!					5.9722	4.981	3.029
40	4.01996	315.107	0.0196804	0.0196078	0.0118588	#REF!	#REF!	#REF!					5.0185	5	3.024
41	4.01796	315.264	0.0196078	0.0196078	0.0156078	#REF!	#REF!	#REF!					5	5	3.98
42	4.01596	315.421	0.0161773	0.023451	0.0156863	#REF!	#REF!	#REF!					4.1252	5.98	4
43	4.01396	315.579	0.0162086	0.0235294	0.0156863	#REF!	#REF!	#REF!					4.1332	6	4
44	4.01196	315.736	0.0130871	0.0243765	0.0156863	#REF!	#REF!	#REF!					3.3372	6.216	4
45	4.00996	315.894	0.0132231	0.0361882	0.0271922	#REF!	#REF!	#REF!					3.3719	9.228	6.934
46	4.00796	316.051	0.0164494	0.0400235	0.027451	#REF!	#REF!	#REF!					4.1946	10.206	7
47	4.00595	316.209	0.0166224	0.0558196	0.0734314	#REF!	#REF!	#REF!					4.2387	14.234	18.725
48	4.00395	316.367	0.0157106	0.0647922	0.0745098	#REF!	#REF!	#REF!					4.0062	16.522	19
49	4.00195	316.525	0.0156863	0.0702431	0.131925	#REF!	#REF!	#REF!					4	17.912	33.641
50	3.99995	316.684	0.0156863	0.0704706	0.133333	#REF!	#REF!	#REF!					4	17.97	34
51	3.99795	316.842	0.0156863	0.0712275	0.194518	#REF!	#REF!	#REF!					4	18.163	49.602
52	3.99595	317.001	0.0180925	0.0725412	0.196078	#REF!	#REF!	#REF!					4.6136	18.498	50
53	3.99395	317.16	0.0180518	0.0710784	0.173157	#REF!	#REF!	#REF!					4.6032	18.125	44.155
54	3.99195	317.319	0.0157459	0.0699176	0.172549	#REF!	#REF!	#REF!					4.0152	17.829	44
55	3.98995	317.478	0.0156863	0.0786353	0.115306	#REF!	#REF!	#REF!					4	20.052	29.403
56	3.98795	317.637	0.0176855	0.0838078	0.113725	#REF!	#REF!	#REF!					4.5098	21.371	29
57	3.98594	317.797	0.0176384	0.081251	0.1366	#REF!	#REF!	#REF!					4.4978	20.719	34.833
58	3.98394	317.956	0.019549	0.0845176	0.137255	#REF!	#REF!	#REF!					4.985	21.552	35
59	3.98194	318.116	0.0196078	0.0915765	0.156298	#REF!	#REF!	#REF!					5	23.352	39.856
60	3.97994	318.276	0.0196078	0.0982863	0.156863	#REF!	#REF!	#REF!					5	25.063	40
61	3.97794	318.436	0.0196078	0.107114	0.153059	#REF!	#REF!	#REF!					5	27.314	39.03
62	3.97594	318.596	0.0220188	0.113957	0.152941	#REF!	#REF!	#REF!					5.6148	29.059	39
63	3.97394	318.757	0.0221973	0.116937	0.141537	#REF!	#REF!	#REF!					5.6603	29.819	36.092
64	3.97194	318.917	0.0223008	0.121196	0.141176	#REF!	#REF!	#REF!					5.6867	30.905	36
65	3.96994	319.078	0.0224039	0.129569	0.148773	#REF!	#REF!	#REF!					5.713	33.04	37.937
66	3.96794	319.239	0.0291086	0.134922	0.14902	#REF!	#REF!	#REF!					7.4227	34.405	38
67	3.96593	319.4	0.0295353	0.135451	0.14902	#REF!	#REF!	#REF!					7.5315	34.54	38
68	3.96393	319.561	0.0343216	0.140918	0.14902	#REF!	#REF!	#REF!					8.752	35.934	38
69	3.96193	319.723	0.034582	0.152745	0.152808	#REF!	#REF!	#REF!					8.8184	38.95	38.966
70	3.95993	319.884	0.0480725	0.149169	0.152941	#REF!	#REF!	#REF!					12.2585	38.038	39
71	3.95793	320.046	0.0489592	0.145235	0.145369	#REF!	#REF!	#REF!					12.4846	37.035	37.069
72	3.95593	320.208	0.0573282	0.148882	0.145098	#REF!	#REF!	#REF!					14.6187	37.965	37
73	3.95393	320.37	0.0579278	0.145239	0.141318	#REF!	#REF!	#REF!					14.7716	37.036	36.036
74	3.95193	320.532	0.0654216	0.151188	0.141176	#REF!	#REF!	#REF!					16.6825	38.553	36
75	3.94993	320.694	0.0662075	0.159165	0.13362	#REF!	#REF!	#REF!					16.8829	40.587	34.073
76	3.94793	320.857	0.0742188	0.154286	0.133333	#REF!	#REF!	#REF!					18.9258	39.343	34
77	3.94592	321.02	0.0745098	0.15389	0.140882	#REF!	#REF!	#REF!					19	39.242	35.925
78	3.94392	321.183	0.078282	0.157106	0.141176	#REF!	#REF!	#REF!					19.9619	40.062	36
79	3.94192	321.346	0.0784314	0.168184	0.152486	#REF!	#REF!	#REF!					20	42.887	38.884
80	3.93992	321.509	0.0897369	0.168808	0.152941	#REF!	#REF!	#REF!					22.8829	43.046	39
81	3.93792	321.672	0.0901961	0.165039	0.149176	#REF!	#REF!	#REF!					23	42.085	38.04
82	3.93592	321.836	0.0826667	0.176	0.149027	#REF!	#REF!	#REF!					21.08	44.88	38.002
83	3.93392	321.999	0.0823529	0.183902	0.167843	#REF!	#REF!	#REF!					21	46.895	42.8
84	3.93192	322.163	0.0861137	0.191639	0.168627	#REF!	#REF!	#REF!					21.959	48.868	43
85	3.92992	322.327	0.0862745	0.192145	0.185749	#REF!	#REF!	#REF!					22	48.997	47.366
86	3.92792	322.491	0.0862745	0.199671	0.185914	#REF!	#REF!	#REF!					22	50.916	47.408
87	3.92592	322.656	0.0862745	0.20751	0.184357	#REF!	#REF!	#REF!					22	52.915	47.011
88	3.92391	322.82	0.0937808	0.207843	0.184314	#REF!	#REF!	#REF!					23.9141	53	47
89	3.92191	322.985	0.0941176	0.211596	0.209169	#REF!	#REF!	#REF!					24	53.957	53.338
90	3.91991	323.15	0.0903682	0.223012	0.209529	#REF!	#REF!	#REF!					23.0439	56.868	53.43
91	3.91791	323.315	0.0901961	0.233118	0.209153	#REF!	#REF!	#REF!					23	59.445	53.334
92	3.91591	323.48	0.101433	0.233373	0.208882	#REF!	#REF!	#REF!					25.8653	59.51	53.265
93	3.91391	323.646	0.101961	0.236208	0.229039	#REF!	#REF!	#REF!					26	60.233	58.405
94	3.91191	323.811	0.101961	0.247671	0.229533	#REF!	#REF!	#REF!					26	63.156	58.531
95	3.90991	323.977	0.101961	0.253408	0.239933	#REF!	#REF!	#REF!					26	64.619	61.183
96	3.90791	324.143	0.105698	0.253557	0.240561	#REF!	#REF!	#REF!					26.9531	64.657	61.343
97	3.90591	324.309	0.105882	0.262306	0.25522	#REF!	#REF!	#REF!					27	66.888	65.081
98	3.9039	324.475	0.105882	0.277682	0.255753	#REF!	#REF!	#REF!					27	70.809	65.217
99	3.9019	324.641	0.105882	0.284345	0.275145	#REF!	#REF!	#REF!					27	72.508	70.162
100	3.8999	324.808	0.105882	0.289922	0.276235	#REF!	#REF!	#REF!					27	73.93	70.44
101	3.8979	324.975	0.105882	0.297388	0.306157	#REF!	#REF!	#REF!					27	75.834	78.07
102	3.8959	325.142	0.117062	0.303584	0.3078	#REF!	#REF!	#REF!					29.8507	77.414	78.489
103	3.8939	325.309	0.117647	0.311522	0.32682	#REF!	#REF!	#REF!					30	79.438	83.339
104	3.8919	325.476	0.113925	0.330824	0.32849	#REF!	#REF!	#REF!					29.0508	84.36	83.765
105	3.8899	325.643	0.113725	0.344192	0.352408	#REF!	#REF!	#REF!					29	87.769	89.864
106	3.8879	325.811	0.124882	0.350773	0.354718	#REF!	#REF!	#REF!					31.8448	89.447	90.453
107	3.8859	325.979	0.12549	0.363404	0.365063	#REF!	#REF!	#REF!					32	92.668	93.091
108	3.88389	326.147	0.13292	0.364337	0.365769	#REF!	#REF!	#REF!					33.8946	92.906	93.271
109	3.88189	326.315	0.133333	0.360988	0.371012	#REF!	#REF!	#REF!					34	92.052	94.608
110	3.87989	326.483	0.129622	0.367035	0.371106	#REF!	#REF!	#REF!					33.0537	93.594	94.632
111	3.87789	326.652	0.129412	0.356506	0.3604	#REF!	#REF!	#REF!					33	90.909	91.902
112	3.87589	326.82	0.144241	0.340471	0.359224	#REF!	#REF!	#REF!					36.7814	86.82	91.602
113	3.87389	326.989	0.145098	0.323212	0.322275	#REF!	#REF!	#REF!					37	82.419	82.18
114	3.87189	327.158	0.141444	0.299204	0.318714	#REF!	#REF!	#REF!					36.0683	76.297	81.272
115	3.86989	327.327	0.141538	0.274827	0.268329	#REF!	#REF!	#REF!					36.0922	70.081	68.424
116	3.86789	327.497	0.156435	0.253518	0.2636	#REF!	#REF!	#REF!					39.891	64.647	67.218
117	3.86589	327.666	0.157517	0.235745	0.225824	#REF!	#REF!	#REF!					40.1669	60.115	57.585
118	3.86388	327.836	0.163086	0.219871	0.222306	#REF!	#REF!	#REF!					41.587	56.067	56.688
119	3.86188	328.006	0.163104	0.217259	0.227784	#REF!	#REF!	#REF!					41.5915	55.401	58.085
120	3.85988	328.176	0.167778	0.216812	0.228012	#REF!	#REF!	#REF!					42.7833	55.287	58.143
121	3.85788	328.346	0.167364	0.226624	0.244702	#REF!	#REF!	#REF!					42.6779	57.789	62.399
122	3.85588	328.516	0.154783	0.231051	0.246427	#REF!	#REF!	#REF!					39.4696	58.918	62.839
123	3.85388	328.687	0.153205	0.235071	0.272863	#REF!	#REF!	#REF!					39.0673	59.943	69.58
124	3.85188	328.858	0.140338	0.238894	0.27451	#REF!	#REF!	#REF!					35.7863	60.918	70
125	3.84988	329.028	0.138633	0.242702	0.270827	#REF!	#REF!	#REF!					35.3514	61.889	69.061
126	3.84788	329.2	0.125341	0.246525	0.270588	#REF!	#REF!	#REF!					31.962	62.864	69
127	3.84588	329.371	0.123808	0.242992	0.26691	#REF!	#REF!	#REF!					31.571	61.963	68.062
128	3.84388	329.542	0.1148	0.239431	0.266667	#REF!	#REF!	#REF!					29.274	61.055	68
129	3.84187	329.714	0.113731	0.24289	0.262992	#REF!	#REF!	#REF!					29.0015	61.937	67.063
130	3.83987	329.886	0.111107	0.240729	0.262745	#REF!	#REF!	#REF!					28.3322	61.386	67
131	3.83787	330.058	0.11055	0.237086	0.277427	#REF!	#REF!	#REF!					28.1903	60.457	70.744
132	3.83587	330.23	0.104556	0.241122	0.278431	#REF!	#REF!	#REF!					26.6617	61.486	71
133	3.83387	330.402	0.103861	0.241212	0.289431	#REF!	#REF!	#REF!					26.4846	61.509	73.805
134	3.83187	330.575	0.100347	0.236659	0.290196	#REF!	#REF!	#REF!					25.5886	60.348	74
135	3.82987	330.748	0.100227	0.232784	0.279208	#REF!	#REF!	#REF!					25.5578	59.36	71.198
136	3.82787	330.92	0.0990973	0.226467	0.278431	#REF!	#REF!	#REF!					25.2698	57.749	71
137	3.82587	331.094	0.0986996	0.229878	0.285749	#REF!	#REF!	#REF!					25.1684	58.619	72.866
138	3.82387	331.267	0.102047	0.235929	0.286275	#REF!	#REF!	#REF!					26.022	60.162	73
139	3.82186	331.44	0.102001	0.236141	0.267996	#REF!	#REF!	#REF!					26.0102	60.216	68.339
140	3.81986	331.614	0.101691	0.225898	0.266667	#REF!	#REF!	#REF!					25.9312	57.604	68
141	3.81786	331.788	0.101381	0.216345	0.25571	#REF!	#REF!	#REF!					25.8521	55.168	65.206
142	3.81586	331.962	0.0882404	0.217639	0.254902	#REF!	#REF!	#REF!					22.5013	55.498	65
143	3.81386	332.136	0.0871816	0.224984	0.269494	#REF!	#REF!	#REF!					22.2313	57.371	68.721
144	3.81186	332.31	0.0922188	0.218247	0.270588	#REF!	#REF!	#REF!					23.5158	55.653	69
145	3.80986	332.485	0.0922976	0.21051	0.263302	#REF!	#REF!	#REF!					23.5359	53.68	67.142
146	3.80786	332.659	0.100141	0.211643	0.262745	#REF!	#REF!	#REF!					25.5359	53.969	67
147	3.80586	332.834	0.100973	0.211765	0.248184	#REF!	#REF!	#REF!					25.7482	54	63.287
148	3.80386	333.009	0.0880757	0.209541	0.247059	#REF!	#REF!	#REF!					22.4593	53.433	63
149	3.80185	333.185	0.0868486	0.207945	0.250694	#REF!	#REF!	#REF!					22.1464	53.026	63.927
150	3.79985	333.36	0.0899361	0.209008	0.25098	#REF!	#REF!	#REF!					22.9337	53.297	64
151	3.79785	333.536	0.0901961	0.205659	0.243714	#REF!	#REF!	#REF!					23	52.443	62.147
152	3.79585	333.712	0.0974573	0.200412	0.243137	#REF!	#REF!	#REF!					24.8516	51.105	62
153	3.79385	333.888	0.0980392	0.202663	0.250396	#REF!	#REF!	#REF!					25	51.679	63.851
154	3.79185	334.064	0.0980392	0.212098	0.25098	#REF!	#REF!	#REF!					25	54.085	64
155	3.78985	334.24	0.0980392	0.216749	0.243729	#REF!	#REF!	#REF!					25	55.271	62.151
156	3.78785	334.417	0.0871702	0.21511	0.243137	#REF!	#REF!	#REF!					22.2284	54.853	62
157	3.78585	334.593	0.0862745	0.218647	0.257624	#REF!	#REF!	#REF!					22	55.755	65.694
158	3.78385	334.77	0.0862745	0.228855	0.258824	#REF!	#REF!	#REF!					22	58.358	66
159	3.78184	334.948	0.0862745	0.237196	0.269675	#REF!	#REF!	#REF!					22	60.485	68.767
160	3.77984	335.125	0.0935051	0.245322	0.270588	#REF!	#REF!	#REF!					23.8438	62.557	69
161	3.77784	335.302	0.0941176	0.253188	0.30311	#REF!	#REF!	#REF!					24	64.563	77.293
162	3.77584	335.48	0.0941176	0.257949	0.305882	#REF!	#REF!	#REF!					24	65.777	78
163	3.77384	335.658	0.0941176	0.26578	0.320322	#REF!	#REF!	#REF!					24	67.774	81.682
164	3.77184	335.836	0.0905098	0.263075	0.321624	#REF!	#REF!	#REF!					23.08	67.084	82.014
165	3.76984	336.014	0.0901961	0.266271	0.332635	#REF!	#REF!	#REF!					23	67.899	84.822
166	3.76784	336.193	0.0974039	0.277278	0.333733	#REF!	#REF!	#REF!					24.838	70.706	85.102
167	3.76584	336.371	0.0980392	0.282278	0.358055	#REF!	#REF!	#REF!					25	71.981	91.304
168	3.76384	336.55	0.101639	0.279145	0.360004	#REF!	#REF!	#REF!					25.918	71.182	91.801
169	3.76184	336.729	0.101961	0.285224	0.357106	#REF!	#REF!	#REF!					26	72.732	91.062
170	3.75983	336.908	0.109153	0.28929	0.356863	#REF!	#REF!	#REF!					27.8341	73.769	91
171	3.75783	337.088	0.109804	0.29138	0.364671	#REF!	#REF!	#REF!					28	74.302	92.991
172	3.75583	337.267	0.0990267	0.306114	0.365478	#REF!	#REF!	#REF!					25.2518	78.059	93.197
173	3.75383	337.447	0.0980392	0.30962	0.377141	#REF!	#REF!	#REF!					25	78.953	96.171
174	3.75183	337.627	0.112393	0.31698	0.3784	#REF!	#REF!	#REF!					28.6603	80.83	96.492
175	3.74983	337.807	0.113725	0.321525	0.392553	#REF!	#REF!	#REF!					29	81.989	100.101
176	3.74783	337.988	0.106556	0.3248	0.394718	#REF!	#REF!	#REF!					27.1718	82.824	100.653
177	3.74583	338.168	0.105882	0.331345	0.42569	#REF!	#REF!	#REF!					27	84.493	108.551
178	3.74383	338.349	0.109463	0.333337	0.428918	#REF!	#REF!	#REF!					27.9131	85.001	109.374
179	3.74183	338.53	0.109804	0.337322	0.441357	#REF!	#REF!	#REF!					28	86.017	112.546
180	3.73982	338.711	0.109804	0.345102	0.442988	#REF!	#REF!	#REF!					28	88.001	112.962
181	3.73782	338.892	0.109804	0.349655	0.472067	#REF!	#REF!	#REF!					28	89.162	120.377
182	3.73582	339.074	0.106231	0.35029	0.475318	#REF!	#REF!	#REF!					27.0888	89.324	121.206
183	3.73382	339.256	0.105882	0.352482	0.480843	#REF!	#REF!	#REF!					27	89.883	122.615
184	3.73182	339.437	0.116591	0.356431	0.480667	#REF!	#REF!	#REF!					29.7306	90.89	122.57
185	3.72982	339.62	0.117647	0.353204	0.481933	#REF!	#REF!	#REF!					30	90.067	122.893
186	3.72782	339.802	0.110516	0.350718	0.481745	#REF!	#REF!	#REF!					28.1816	89.433	122.845
187	3.72582	339.984	0.109804	0.344667	0.462643	#REF!	#REF!	#REF!					28	87.89	117.974
188	3.72382	340.167	0.120489	0.333039	0.459996	#REF!	#REF!	#REF!					30.7247	84.925	117.299
189	3.72182	340.35	0.121569	0.324455	0.441804	#REF!	#REF!	#REF!					31	82.736	112.66
190	3.71981	340.533	0.121592	0.312678	0.438498	#REF!	#REF!	#REF!					31.006	79.733	111.817
191	3.71781	340.716	0.121701	0.308792	0.411953	#REF!	#REF!	#REF!					31.0337	78.742	105.048
192	3.71581	340.9	0.11825	0.302361	0.408424	#REF!	#REF!	#REF!					30.1537	77.102	104.148
193	3.71381	341.083	0.117986	0.300424	0.401851	#REF!	#REF!	#REF!					30.0864	76.608	102.472
194	3.71181	341.267	0.117289	0.297518	0.400502	#REF!	#REF!	#REF!					29.9086	75.867	102.128
195	3.70981	341.451	0.117102	0.296102	0.3864	#REF!	#REF!	#REF!					29.8609	75.506	98.532
196	3.70781	341.636	0.115212	0.288729	0.384137	#REF!	#REF!	#REF!					29.3791	73.626	97.955
197	3.70581	341.82	0.11523	0.277835	0.369224	#REF!	#REF!	#REF!					29.3836	70.848	94.152
198	3.70381	342.005	0.118206	0.269404	0.367349	#REF!	#REF!	#REF!					30.1426	68.698	93.674
199	3.70181	342.19	0.118606	0.270373	0.371016	#REF!	#REF!	#REF!					30.2445	68.945	94.609
200	3.6998	342.375	0.111632	0.274125	0.370973	#REF!	#REF!	#REF!					28.4661	69.902	94.598
201	3.6978	342.56	0.110969	0.271984	0.370157	#REF!	#REF!	#REF!					28.2972	69.356	94.39
202	3.6958	342.745	0.118246	0.27142	0.369737	#REF!	#REF!	#REF!					30.1528	69.212	94.283
203	3.6938	342.931	0.118824	0.270969	0.365824	#REF!	#REF!	#REF!					30.3001	69.097	93.285
204	3.6918	343.117	0.110682	0.27429	0.365051	#REF!	#REF!	#REF!					28.2238	69.944	93.088
205	3.6898	343.303	0.109804	0.27449	0.364706	#REF!	#REF!	#REF!					28	69.995	93
206	3.6878	343.489	0.110305	0.274392	0.364706	#REF!	#REF!	#REF!					28.1277	69.97	93
207	3.6858	343.676	0.110154	0.277835	0.354129	#REF!	#REF!	#REF!					28.0893	70.848	90.303
208	3.6838	343.862	0.106424	0.274878	0.352941	#REF!	#REF!	#REF!					27.1381	70.094	90
209	3.6818	344.049	0.105819	0.264298	0.352941	#REF!	#REF!	#REF!					26.9839	67.396	90
210	3.6798	344.236	0.102093	0.263231	0.352941	#REF!	#REF!	#REF!					26.0337	67.124	90
211	3.67779	344.424	0.101484	0.266847	0.349424	#REF!	#REF!	#REF!					25.8785	68.046	89.103
212	3.67579	344.611	0.108922	0.267957	0.34902	#REF!	#REF!	#REF!					27.775	68.329	89
213	3.67379	344.799	0.109804	0.271035	0.359561	#REF!	#REF!	#REF!					28	69.114	91.688
214	3.67179	344.987	0.10531	0.276145	0.360784	#REF!	#REF!	#REF!					26.854	70.417	92
215	3.66979	345.175	0.104579	0.276498	0.350255	#REF!	#REF!	#REF!					26.6676	70.507	89.315
216	3.66779	345.363	0.110582	0.280765	0.34902	#REF!	#REF!	#REF!					28.1985	71.595	89
217	3.66579	345.552	0.111521	0.284702	0.356031	#REF!	#REF!	#REF!					28.4378	72.599	90.788
218	3.66379	345.74	0.109116	0.278012	0.356863	#REF!	#REF!	#REF!					27.8245	70.893	91
219	3.66179	345.929	0.108908	0.280584	0.363867	#REF!	#REF!	#REF!					27.7716	71.549	92.786
220	3.65979	346.119	0.112512	0.283118	0.364706	#REF!	#REF!	#REF!					28.6906	72.195	93
221	3.65778	346.308	0.113036	0.279694	0.364706	#REF!	#REF!	#REF!					28.8243	71.322	93
222	3.65578	346.497	0.104216	0.279961	0.364706	#REF!	#REF!	#REF!					26.5752	71.39	93
223	3.65378	346.687	0.102925	0.275125	0.38218	#REF!	#REF!	#REF!					26.246	70.157	97.456
224	3.65178	346.877	0.108692	0.272882	0.384314	#REF!	#REF!	#REF!					27.7164	69.585	98
225	3.64978	347.067	0.109528	0.272588	0.370349	#REF!	#REF!	#REF!					27.9297	69.51	94.439
226	3.64778	347.258	0.103113	0.2708	0.368627	#REF!	#REF!	#REF!					26.2939	69.054	94
227	3.64578	347.448	0.102098	0.26898	0.372114	#REF!	#REF!	#REF!					26.0351	68.59	94.889
228	3.64378	347.639	0.105446	0.266914	0.372549	#REF!	#REF!	#REF!					26.8887	68.063	95
229	3.64178	347.83	0.105882	0.266667	0.362098	#REF!	#REF!	#REF!					27	68	92.335
230	3.63978	348.021	0.102401	0.268016	0.360784	#REF!	#REF!	#REF!					26.1122	68.344	92
231	3.63777	348.213	0.101961	0.26809	0.367745	#REF!	#REF!	#REF!					26	68.363	93.775
232	3.63577	348.404	0.108916	0.266816	0.368627	#REF!	#REF!	#REF!					27.7735	68.038	94
233	3.63377	348.596	0.109804	0.262098	0.347773	#REF!	#REF!	#REF!					28	66.835	88.682
234	3.63177	348.788	0.102856	0.257682	0.345098	#REF!	#REF!	#REF!					26.2284	65.709	88
235	3.62977	348.981	0.101961	0.263929	0.352043	#REF!	#REF!	#REF!					26	67.302	89.771
236	3.62777	349.173	0.105431	0.271698	0.352941	#REF!	#REF!	#REF!					26.8848	69.283	90
237	3.62577	349.366	0.105882	0.262408	0.363345	#REF!	#REF!	#REF!					27	66.914	92.653
238	3.62377	349.559	0.102416	0.258439	0.364706	#REF!	#REF!	#REF!					26.1162	65.902	93
239	3.62177	349.752	0.101961	0.261627	0.350851	#REF!	#REF!	#REF!					26	66.715	89.467
240	3.61977	349.945	0.101961	0.259216	0.34902	#REF!	#REF!	#REF!					26	66.1	89
241	3.61776	350.139	0.101961	0.255365	0.342098	#REF!	#REF!	#REF!					26	65.118	87.235
242	3.61576	350.332	0.0950439	0.251443	0.341176	#REF!	#REF!	#REF!					24.2362	64.118	87
243	3.61376	350.526	0.0941176	0.25098	0.341176	#REF!	#REF!	#REF!					24	64	87
244	3.61176	350.721	0.101027	0.25098	0.341176	#REF!	#REF!	#REF!					25.7618	64	87
245	3.60976	350.915	0.101961	0.247529	0.323914	#REF!	#REF!	#REF!					26	63.12	82.598
246	3.60776	351.11	0.0950592	0.250498	0.321592	#REF!	#REF!	#REF!					24.2401	63.877	82.006
247	3.60576	351.305	0.0941176	0.247518	0.318427	#REF!	#REF!	#REF!					24	63.117	81.199
248	3.60376	351.5	0.0975647	0.243612	0.318255	#REF!	#REF!	#REF!					24.879	62.121	81.155
249	3.60176	351.695	0.0980392	0.242875	0.333933	#REF!	#REF!	#REF!					25	61.933	85.153
250	3.59976	351.89	0.0980392	0.242741	0.335678	#REF!	#REF!	#REF!					25	61.899	85.598
251	3.59776	352.086	0.0980392	0.239635	0.331855	#REF!	#REF!	#REF!					25	61.107	84.623
252	3.59575	352.282	0.0911608	0.23629	0.330992	#REF!	#REF!	#REF!					23.246	60.254	84.403
253	3.59375	352.478	0.0901961	0.235976	0.327769	#REF!	#REF!	#REF!					23	60.174	83.581
254	3.59175	352.675	0.0970671	0.239506	0.327082	#REF!	#REF!	#REF!					24.7521	61.074	83.406
255	3.58975	352.871	0.0980392	0.240851	0.327557	#REF!	#REF!	#REF!					25	61.417	83.527
256	3.58775	353.068	0.104902	0.235137	0.327475	#REF!	#REF!	#REF!					26.7501	59.96	83.506
257	3.58575	353.265	0.105882	0.237702	0.337573	#REF!	#REF!	#REF!					27	60.614	86.081
258	3.58375	353.462	0.0955988	0.234627	0.338855	#REF!	#REF!	#REF!					24.3777	59.83	86.408
259	3.58175	353.66	0.0941176	0.234039	0.340996	#REF!	#REF!	#REF!					24	59.68	86.954
260	3.57975	353.857	0.0975416	0.240792	0.341043	#REF!	#REF!	#REF!					24.8731	61.402	86.966
261	3.57775	354.055	0.0980392	0.24169	0.328698	#REF!	#REF!	#REF!					25	61.631	83.818
262	3.57574	354.253	0.101459	0.238176	0.327031	#REF!	#REF!	#REF!					25.8721	60.735	83.393
263	3.57374	354.452	0.101961	0.244416	0.339937	#REF!	#REF!	#REF!					26	62.326	86.684
264	3.57174	354.65	0.0985443	0.245325	0.341631	#REF!	#REF!	#REF!					25.1288	62.558	87.116
265	3.56974	354.849	0.0980392	0.245227	0.341439	#REF!	#REF!	#REF!					25	62.533	87.067
266	3.56774	355.048	0.0946216	0.243396	0.341247	#REF!	#REF!	#REF!					24.1285	62.066	87.018
267	3.56574	355.247	0.0941176	0.244894	0.339298	#REF!	#REF!	#REF!					24	62.448	86.521
268	3.56374	355.447	0.0943322	0.247094	0.338749	#REF!	#REF!	#REF!					24.0547	63.009	86.381
269	3.56174	355.647	0.0944678	0.249047	0.345275	#REF!	#REF!	#REF!					24.0893	63.507	88.045
270	3.55974	355.846	0.0945714	0.252773	0.346016	#REF!	#REF!	#REF!					24.1157	64.457	88.234
271	3.55774	356.047	0.0946745	0.24998	0.348584	#REF!	#REF!	#REF!					24.142	63.745	88.889
272	3.55573	356.247	0.0958882	0.246157	0.34902	#REF!	#REF!	#REF!					24.4515	62.77	89
273	3.55373	356.448	0.0957482	0.24578	0.376212	#REF!	#REF!	#REF!					24.4158	62.674	95.934
274	3.55173	356.648	0.0957965	0.255788	0.380392	#REF!	#REF!	#REF!					24.4281	65.226	97
275	3.54973	356.849	0.0960584	0.256188	0.370208	#REF!	#REF!	#REF!					24.4949	65.328	94.403
276	3.54773	357.051	0.0978004	0.259333	0.368627	#REF!	#REF!	#REF!					24.9391	66.13	94
277	3.54573	357.252	0.0980392	0.264918	0.384769	#REF!	#REF!	#REF!					25	67.554	98.116
278	3.54373	357.454	0.0957565	0.262427	0.387388	#REF!	#REF!	#REF!					24.4179	66.919	98.784
279	3.54173	357.656	0.0955016	0.263294	0.385396	#REF!	#REF!	#REF!					24.3529	67.14	98.276
280	3.53973	357.858	0.0956047	0.266788	0.384969	#REF!	#REF!	#REF!					24.3792	68.031	98.167
281	3.53773	358.06	0.0957082	0.271094	0.390192	#REF!	#REF!	#REF!					24.4056	69.129	99.499
282	3.53572	358.263	0.0962718	0.281663	0.391227	#REF!	#REF!	#REF!					24.5493	71.824	99.763
283	3.53372	358.466	0.096242	0.282455	0.402196	#REF!	#REF!	#REF!					24.5417	72.026	102.56
284	3.53172	358.669	0.099309	0.282118	0.403922	#REF!	#REF!	#REF!					25.3238	71.94	103
285	3.52972	358.872	0.100129	0.282329	0.420494	#REF!	#REF!	#REF!					25.5329	71.994	107.226
286	3.52772	359.076	0.0968129	0.285655	0.423365	#REF!	#REF!	#REF!					24.6873	72.842	107.958
287	3.52572	359.28	0.0963282	0.286275	0.416784	#REF!	#REF!	#REF!					24.5637	73	106.28
288	3.52372	359.484	0.103172	0.289737	0.415686	#REF!	#REF!	#REF!					26.3089	73.883	106
289	3.52172	359.688	0.104378	0.297137	0.425792	#REF!	#REF!	#REF!					26.6164	75.77	108.577
290	3.51972	359.892	0.0999122	0.298341	0.427451	#REF!	#REF!	#REF!					25.4776	76.077	109
291	3.51772	360.097	0.0993655	0.298435	0.444275	#REF!	#REF!	#REF!					25.3382	76.101	113.29
292	3.51571	360.302	0.0969431	0.292227	0.447059	#REF!	#REF!	#REF!					24.7205	74.518	114
293	3.51371	360.507	0.0962996	0.287506	0.443698	#REF!	#REF!	#REF!					24.5564	73.314	113.143
294	3.51171	360.713	0.0960929	0.287541	0.443137	#REF!	#REF!	#REF!					24.5037	73.323	113
295	3.50971	360.918	0.0958863	0.287831	0.453208	#REF!	#REF!	#REF!					24.451	73.397	115.568
296	3.50771	361.124	0.101053	0.293239	0.454902	#REF!	#REF!	#REF!					25.7686	74.776	116
297	3.50571	361.33	0.101961	0.294118	0.458255	#REF!	#REF!	#REF!					26	75	116.855
298	3.50371	361.537	0.0991004	0.292588	0.458824	#REF!	#REF!	#REF!					25.2706	74.61	117
299	3.50171	361.743	0.0985102	0.295871	0.452125	#REF!	#REF!	#REF!					25.1201	75.447	115.292
300	3.49971	361.95	0.0984067	0.291137	0.45098	#REF!	#REF!	#REF!					25.0937	74.24	115
301	3.49771	362.157	0.0983035	0.281314	0.454325	#REF!	#REF!	#REF!					25.0674	71.735	115.853
302	3.49571	362.365	0.101407	0.283224	0.454902	#REF!	#REF!	#REF!					25.8587	72.222	116
303	3.4937	362.572	0.101961	0.289263	0.451561	#REF!	#REF!	#REF!					26	73.762	115.148
304	3.4917	362.78	0.0986212	0.291592	0.45098	#REF!	#REF!	#REF!					25.1484	74.356	115
305	3.4897	362.988	0.0980392	0.295271	0.447643	#REF!	#REF!	#REF!					25	75.294	114.149
306	3.4877	363.196	0.0947031	0.292831	0.447059	#REF!	#REF!	#REF!					24.1493	74.672	114
307	3.4857	363.405	0.0941176	0.288855	0.450392	#REF!	#REF!	#REF!					24	73.658	114.85
308	3.4837	363.613	0.0974498	0.286561	0.45098	#REF!	#REF!	#REF!					24.8497	73.073	115
309	3.4817	363.822	0.0980392	0.282945	0.460973	#REF!	#REF!	#REF!					25	72.151	117.548
310	3.4797	364.032	0.101367	0.28611	0.462745	#REF!	#REF!	#REF!					25.8487	72.958	118
311	3.4777	364.241	0.101961	0.290298	0.469396	#REF!	#REF!	#REF!					26	74.026	119.696
312	3.4757	364.451	0.101961	0.287008	0.470588	#REF!	#REF!	#REF!					26	73.187	120
313	3.47369	364.661	0.101961	0.289596	0.457298	#REF!	#REF!	#REF!					26	73.847	116.611
314	3.47169	364.871	0.09864	0.291275	0.454902	#REF!	#REF!	#REF!					25.1532	74.275	116
315	3.46969	365.081	0.0980392	0.282745	0.448263	#REF!	#REF!	#REF!					25	72.1	114.307
316	3.46769	365.292	0.101356	0.275545	0.447059	#REF!	#REF!	#REF!					25.8458	70.264	114
317	3.46569	365.503	0.101961	0.271196	0.45369	#REF!	#REF!	#REF!					26	69.155	115.691
318	3.46369	365.714	0.101961	0.270588	0.454902	#REF!	#REF!	#REF!					26	69	116
319	3.46169	365.925	0.101961	0.273898	0.471459	#REF!	#REF!	#REF!					26	69.844	120.222
320	3.45969	366.137	0.10527	0.275141	0.47451	#REF!	#REF!	#REF!					26.8438	70.161	121
321	3.45769	366.349	0.105882	0.275165	0.461282	#REF!	#REF!	#REF!					27	70.167	117.627
322	3.45569	366.561	0.0992718	0.278373	0.458824	#REF!	#REF!	#REF!					25.3143	70.985	117
323	3.45368	366.773	0.0980392	0.278894	0.455522	#REF!	#REF!	#REF!					25	71.118	116.158
324	3.45168	366.986	0.107944	0.2788	0.454902	#REF!	#REF!	#REF!					27.5256	71.094	116
325	3.44968	367.199	0.109804	0.275404	0.4648	#REF!	#REF!	#REF!					28	70.228	118.524
326	3.44768	367.412	0.106506	0.280835	0.466667	#REF!	#REF!	#REF!					27.1591	71.613	119
327	3.44568	367.625	0.105882	0.282192	0.466667	#REF!	#REF!	#REF!					27	71.959	119
328	3.44368	367.839	0.102589	0.279047	0.466651	#REF!	#REF!	#REF!					26.1601	71.157	118.996
329	3.44168	368.053	0.101961	0.278412	0.486122	#REF!	#REF!	#REF!					26	70.995	123.961
330	3.43968	368.267	0.101961	0.281722	0.489576	#REF!	#REF!	#REF!					26	71.839	124.842
331	3.43768	368.481	0.101961	0.285133	0.480439	#REF!	#REF!	#REF!					26	72.709	122.512
332	3.43568	368.696	0.105247	0.288765	0.478831	#REF!	#REF!	#REF!					26.838	73.635	122.102
333	3.43367	368.911	0.105882	0.289208	0.484255	#REF!	#REF!	#REF!					27	73.748	123.485
334	3.43167	369.126	0.105882	0.279169	0.485094	#REF!	#REF!	#REF!					27	71.188	123.699
335	3.42967	369.341	0.105882	0.277635	0.488184	#REF!	#REF!	#REF!					27	70.797	124.487
336	3.42767	369.557	0.0993255	0.280929	0.488635	#REF!	#REF!	#REF!					25.328	71.637	124.602
337	3.42567	369.773	0.0980392	0.281475	0.479	#REF!	#REF!	#REF!					25	71.776	122.145
338	3.42367	369.989	0.101314	0.288741	0.477427	#REF!	#REF!	#REF!					25.835	73.629	121.744
339	3.42167	370.205	0.101961	0.286922	0.493184	#REF!	#REF!	#REF!					26	73.165	125.762
340	3.41967	370.422	0.105232	0.276463	0.496443	#REF!	#REF!	#REF!					26.8341	70.498	126.593
341	3.41767	370.639	0.105882	0.278827	0.511929	#REF!	#REF!	#REF!					27	71.101	130.542
342	3.41567	370.856	0.105874	0.285192	0.515082	#REF!	#REF!	#REF!					26.9978	72.724	131.346
343	3.41367	371.073	0.105882	0.279745	0.510702	#REF!	#REF!	#REF!					27	71.335	130.229
344	3.41166	371.291	0.102834	0.275169	0.509804	#REF!	#REF!	#REF!					26.2227	70.168	130
345	3.40966	371.509	0.102322	0.279137	0.509498	#REF!	#REF!	#REF!					26.0922	71.18	129.922
346	3.40766	371.727	0.102813	0.283427	0.508957	#REF!	#REF!	#REF!					26.2172	72.274	129.784
347	3.40566	371.945	0.103098	0.285922	0.511525	#REF!	#REF!	#REF!					26.2899	72.91	130.439
348	3.40366	372.164	0.102189	0.289529	0.511859	#REF!	#REF!	#REF!					26.0582	73.83	130.524
349	3.40166	372.383	0.101961	0.286941	0.519761	#REF!	#REF!	#REF!					26	73.17	132.539
350	3.39966	372.602	0.109531	0.283024	0.521251	#REF!	#REF!	#REF!					27.9303	72.171	132.919
351	3.39766	372.821	0.11078	0.287439	0.51922	#REF!	#REF!	#REF!					28.2489	73.297	132.401
352	3.39566	373.041	0.107569	0.291835	0.518553	#REF!	#REF!	#REF!					27.4302	74.418	132.231
353	3.39366	373.261	0.107071	0.297102	0.52971	#REF!	#REF!	#REF!					27.3031	75.761	135.076
354	3.39165	373.481	0.109349	0.299212	0.532667	#REF!	#REF!	#REF!					27.8841	76.299	135.83
355	3.38965	373.702	0.109804	0.295027	0.530114	#REF!	#REF!	#REF!					28	75.232	135.179
356	3.38765	373.923	0.111806	0.290878	0.529173	#REF!	#REF!	#REF!					28.5105	74.174	134.939
357	3.38565	374.144	0.112124	0.290196	0.539906	#REF!	#REF!	#REF!					28.5915	74	137.676
358	3.38365	374.365	0.115678	0.296671	0.542808	#REF!	#REF!	#REF!					29.498	75.651	138.416
359	3.38165	374.586	0.116143	0.302957	0.5514	#REF!	#REF!	#REF!					29.6164	77.254	140.607
360	3.37965	374.808	0.110863	0.300267	0.553486	#REF!	#REF!	#REF!					28.2701	76.568	141.139
361	3.37765	375.03	0.109804	0.298333	0.574486	#REF!	#REF!	#REF!					28	76.075	146.494
362	3.37565	375.252	0.114517	0.298039	0.579086	#REF!	#REF!	#REF!					29.2018	76	147.667
363	3.37365	375.475	0.115425	0.29758	0.570973	#REF!	#REF!	#REF!					29.4334	75.883	145.598
364	3.37164	375.698	0.118547	0.304027	0.56909	#REF!	#REF!	#REF!					30.2294	77.527	145.118
365	3.36964	375.921	0.11914	0.305816	0.583686	#REF!	#REF!	#REF!					30.3807	77.983	148.84
366	3.36764	376.144	0.116957	0.312325	0.586204	#REF!	#REF!	#REF!					29.824	79.643	149.482
367	3.36564	376.368	0.116298	0.316945	0.600914	#REF!	#REF!	#REF!					29.6559	80.821	153.233
368	3.36364	376.592	0.116091	0.311212	0.604078	#REF!	#REF!	#REF!					29.6032	79.359	154.04
369	3.36164	376.816	0.115884	0.313004	0.623212	#REF!	#REF!	#REF!					29.5505	79.816	158.919
370	3.35964	377.04	0.118091	0.316733	0.627451	#REF!	#REF!	#REF!					30.1133	80.767	160
371	3.35764	377.265	0.11852	0.310808	0.611392	#REF!	#REF!	#REF!					30.2225	79.256	155.905
372	3.35564	377.49	0.120996	0.312157	0.607843	#REF!	#REF!	#REF!					30.8541	79.6	155
373	3.35364	377.715	0.121569	0.318941	0.614259	#REF!	#REF!	#REF!					31	81.33	156.636
374	3.35163	377.941	0.121569	0.31529	0.615686	#REF!	#REF!	#REF!					31	80.399	157
375	3.34963	378.167	0.121569	0.317522	0.612482	#REF!	#REF!	#REF!					31	80.968	156.183
376	3.34763	378.393	0.115746	0.317773	0.611765	#REF!	#REF!	#REF!					29.5152	81.032	156
377	3.34563	378.619	0.114231	0.317647	0.627765	#REF!	#REF!	#REF!					29.1288	81	160.08
378	3.34363	378.845	0.123375	0.323325	0.631373	#REF!	#REF!	#REF!					31.4606	82.448	161
379	3.34163	379.072	0.12549	0.324518	0.631373	#REF!	#REF!	#REF!					32	82.752	161
380	3.33963	379.299	0.119102	0.323549	0.631373	#REF!	#REF!	#REF!					30.3709	82.505	161
381	3.33763	379.527	0.117647	0.32411	0.653718	#REF!	#REF!	#REF!					30	82.648	166.698
382	3.33563	379.755	0.114456	0.324227	0.658824	#REF!	#REF!	#REF!					29.1864	82.678	168
383	3.33363	379.982	0.113725	0.318859	0.649259	#REF!	#REF!	#REF!					29	81.309	165.561
384	3.33163	380.211	0.120099	0.317647	0.647059	#REF!	#REF!	#REF!					30.6252	81	165
385	3.32962	380.439	0.121569	0.320831	0.64069	#REF!	#REF!	#REF!					31	81.812	163.376
386	3.32762	380.668	0.124751	0.317051	0.639216	#REF!	#REF!	#REF!					31.8116	80.848	163
387	3.32562	380.897	0.12549	0.312725	0.648757	#REF!	#REF!	#REF!					32	79.745	165.433
388	3.32362	381.126	0.122311	0.311686	0.65098	#REF!	#REF!	#REF!					31.1894	79.48	166
389	3.32162	381.356	0.121569	0.314914	0.644627	#REF!	#REF!	#REF!					31	80.303	164.38
390	3.31962	381.586	0.121569	0.317286	0.643137	#REF!	#REF!	#REF!					31	80.908	164
391	3.31762	381.816	0.121569	0.316192	0.643137	#REF!	#REF!	#REF!					31	80.629	164
392	3.31562	382.046	0.121569	0.314149	0.643137	#REF!	#REF!	#REF!					31	80.108	164
393	3.31362	382.277	0.121569	0.313725	0.649475	#REF!	#REF!	#REF!					31	80	165.616
394	3.31162	382.508	0.124736	0.313725	0.65098	#REF!	#REF!	#REF!					31.8077	80	166
395	3.30961	382.739	0.12549	0.313725	0.644651	#REF!	#REF!	#REF!					32	80	164.386
396	3.30761	382.971	0.115999	0.311596	0.643137	#REF!	#REF!	#REF!					29.5798	79.457	164
397	3.30561	383.203	0.113725	0.308114	0.646298	#REF!	#REF!	#REF!					29	78.569	164.806
398	3.30361	383.435	0.120045	0.308455	0.647059	#REF!	#REF!	#REF!					30.6115	78.656	165
399	3.30161	383.667	0.121569	0.311929	0.656533	#REF!	#REF!	#REF!					31	79.542	167.416
400	3.29961	383.9	0.124725	0.309631	0.658824	#REF!	#REF!	#REF!					31.8048	78.956	168
401	3.29761	384.133	0.12549	0.302655	0.655671	#REF!	#REF!	#REF!					32	77.177	167.196
402	3.29561	384.366	0.119186	0.301216	0.654902	#REF!	#REF!	#REF!					30.3924	76.81	167
403	3.29361	384.6	0.117647	0.308133	0.645451	#REF!	#REF!	#REF!					30	78.574	164.59
404	3.29161	384.833	0.120795	0.312506	0.643137	#REF!	#REF!	#REF!					30.8028	79.689	164
405	3.2896	385.067	0.121569	0.306973	0.646282	#REF!	#REF!	#REF!					31	78.278	164.802
406	3.2876	385.302	0.11528	0.305812	0.647059	#REF!	#REF!	#REF!					29.3963	77.982	165
407	3.2856	385.536	0.113725	0.312169	0.659627	#REF!	#REF!	#REF!					29	79.603	168.205
408	3.2836	385.771	0.116866	0.313451	0.662745	#REF!	#REF!	#REF!					29.8009	79.93	169
409	3.2816	386.007	0.117647	0.307357	0.665882	#REF!	#REF!	#REF!					30	78.376	169.8
410	3.2796	386.242	0.117647	0.302725	0.666686	#REF!	#REF!	#REF!					30	77.195	170.005
411	3.2776	386.478	0.117647	0.305075	0.675725	#REF!	#REF!	#REF!					30	77.794	172.31
412	3.2756	386.714	0.117647	0.309016	0.677588	#REF!	#REF!	#REF!					30	78.799	172.785
413	3.2736	386.95	0.117647	0.309561	0.669525	#REF!	#REF!	#REF!					30	78.938	170.729
414	3.2716	387.187	0.130164	0.303463	0.667871	#REF!	#REF!	#REF!					33.1918	77.383	170.307
415	3.26959	387.424	0.133333	0.301565	0.678686	#REF!	#REF!	#REF!					34	76.899	173.065
416	3.26759	387.661	0.123957	0.298714	0.681165	#REF!	#REF!	#REF!					31.6091	76.172	173.697
417	3.26559	387.899	0.121569	0.29749	0.679878	#REF!	#REF!	#REF!					31	75.86	173.369
418	3.26359	388.137	0.121606	0.297878	0.679216	#REF!	#REF!	#REF!					31.0095	75.959	173.2
419	3.26159	388.375	0.121735	0.298741	0.660878	#REF!	#REF!	#REF!					31.0425	76.179	168.524
420	3.25959	388.613	0.121838	0.299016	0.656835	#REF!	#REF!	#REF!					31.0688	76.249	167.493
421	3.25759	388.852	0.121942	0.295996	0.663914	#REF!	#REF!	#REF!					31.0952	75.479	169.298
422	3.25559	389.091	0.124402	0.295286	0.665498	#REF!	#REF!	#REF!					31.7226	75.298	169.702
423	3.25359	389.33	0.12491	0.298596	0.661184	#REF!	#REF!	#REF!					31.8521	76.142	168.602
424	3.25159	389.57	0.127917	0.302353	0.660184	#REF!	#REF!	#REF!					32.6188	77.1	168.347
425	3.24959	389.81	0.128625	0.300216	0.6688	#REF!	#REF!	#REF!					32.7994	76.555	170.544
426	3.24758	390.05	0.123719	0.290271	0.671318	#REF!	#REF!	#REF!					31.5484	74.019	171.186
427	3.24558	390.29	0.122562	0.28842	0.664592	#REF!	#REF!	#REF!					31.2533	73.547	169.471
428	3.24358	390.531	0.127135	0.292933	0.662745	#REF!	#REF!	#REF!					32.4194	74.698	169
429	3.24158	390.772	0.128212	0.295376	0.675149	#REF!	#REF!	#REF!					32.694	75.321	172.163
430	3.23958	391.013	0.121911	0.292898	0.678431	#REF!	#REF!	#REF!					31.0874	74.689	173
431	3.23758	391.255	0.120162	0.289157	0.656863	#REF!	#REF!	#REF!					30.6413	73.735	167.5
432	3.23558	391.497	0.125056	0.290075	0.651306	#REF!	#REF!	#REF!					31.8894	73.969	166.083
433	3.23358	391.739	0.126185	0.292055	0.653251	#REF!	#REF!	#REF!					32.1772	74.474	166.579
434	3.23158	391.982	0.126363	0.28942	0.654008	#REF!	#REF!	#REF!					32.2225	73.802	166.772
435	3.22958	392.225	0.126053	0.286788	0.669737	#REF!	#REF!	#REF!					32.1435	73.131	170.783
436	3.22757	392.468	0.12564	0.286275	0.674188	#REF!	#REF!	#REF!					32.0381	73	171.918
437	3.22557	392.711	0.125226	0.285235	0.684741	#REF!	#REF!	#REF!					31.9326	72.735	174.609
438	3.22357	392.955	0.123937	0.285051	0.688004	#REF!	#REF!	#REF!					31.6039	72.688	175.441
439	3.22157	393.199	0.123802	0.282953	0.677078	#REF!	#REF!	#REF!					31.5695	72.153	172.655
440	3.21957	393.444	0.126394	0.282353	0.673682	#REF!	#REF!	#REF!					32.2305	72	171.789
441	3.21757	393.688	0.126971	0.285431	0.678082	#REF!	#REF!	#REF!					32.3777	72.785	172.911
442	3.21557	393.933	0.124873	0.289349	0.679271	#REF!	#REF!	#REF!					31.8427	73.784	173.214
443	3.21357	394.179	0.124118	0.290196	0.677271	#REF!	#REF!	#REF!					31.6501	74	172.704
444	3.21157	394.424	0.133446	0.289686	0.676455	#REF!	#REF!	#REF!					34.0287	73.87	172.496
445	3.20957	394.67	0.136187	0.289643	0.681914	#REF!	#REF!	#REF!					34.7277	73.859	173.888
446	3.20756	394.916	0.132468	0.283243	0.683988	#REF!	#REF!	#REF!					33.7793	72.227	174.417
447	3.20556	395.163	0.131611	0.279129	0.672529	#REF!	#REF!	#REF!					33.5608	71.178	171.495
448	3.20356	395.41	0.129938	0.284769	0.668529	#REF!	#REF!	#REF!					33.1341	72.616	170.475
449	3.20156	395.657	0.129412	0.280455	0.687565	#REF!	#REF!	#REF!					33	71.516	175.329
450	3.19956	395.904	0.127642	0.2724	0.693671	#REF!	#REF!	#REF!					32.5487	69.462	176.886
451	3.19756	396.152	0.126834	0.270608	0.694118	#REF!	#REF!	#REF!					32.3426	69.005	177
452	3.19556	396.4	0.128238	0.276725	0.694118	#REF!	#REF!	#REF!					32.7006	70.565	177
453	3.19356	396.648	0.128929	0.284541	0.681898	#REF!	#REF!	#REF!					32.877	72.558	173.884
454	3.19156	396.897	0.132296	0.289086	0.678431	#REF!	#REF!	#REF!					33.7355	73.717	173
455	3.18956	397.146	0.133299	0.28369	0.693686	#REF!	#REF!	#REF!					33.9912	72.341	176.89
456	3.18755	397.395	0.133333	0.276533	0.698039	#REF!	#REF!	#REF!					34	70.516	178
457	3.18555	397.645	0.133333	0.278153	0.688898	#REF!	#REF!	#REF!					34	70.929	175.669
458	3.18355	397.895	0.130288	0.281094	0.686275	#REF!	#REF!	#REF!					33.2235	71.679	175
459	3.18155	398.145	0.129412	0.278522	0.695404	#REF!	#REF!	#REF!					33	71.023	177.328
460	3.17955	398.396	0.135494	0.279906	0.698039	#REF!	#REF!	#REF!					34.551	71.376	178
461	3.17755	398.647	0.137255	0.286475	0.704118	#REF!	#REF!	#REF!					35	73.051	179.55
462	3.17555	398.898	0.137255	0.285843	0.705882	#REF!	#REF!	#REF!					35	72.89	180
463	3.17355	399.149	0.137255	0.285106	0.705882	#REF!	#REF!	#REF!					35	72.702	180
464	3.17155	399.401	0.140288	0.279922	0.705882	#REF!	#REF!	#REF!					35.7735	71.38	180
465	3.16955	399.653	0.141176	0.2754	0.69982	#REF!	#REF!	#REF!					36	70.227	178.454
466	3.16755	399.906	0.138147	0.278318	0.698039	#REF!	#REF!	#REF!					35.2274	70.971	178
467	3.16554	400.159	0.137255	0.285306	0.72529	#REF!	#REF!	#REF!					35	72.753	184.949
468	3.16354	400.412	0.137255	0.286416	0.733333	#REF!	#REF!	#REF!					35	73.036	187
469	3.16154	400.665	0.137255	0.286275	0.727286	#REF!	#REF!	#REF!					35	73	185.458
470	3.15954	400.919	0.140277	0.286463	0.72549	#REF!	#REF!	#REF!					35.7706	73.048	185
471	3.15754	401.173	0.141176	0.281776	0.719451	#REF!	#REF!	#REF!					36	71.853	183.46
472	3.15554	401.427	0.141176	0.277306	0.717647	#REF!	#REF!	#REF!					36	70.713	183
473	3.15354	401.682	0.141176	0.282337	0.726694	#REF!	#REF!	#REF!					36	71.996	185.307
474	3.15154	401.937	0.147205	0.290482	0.729412	#REF!	#REF!	#REF!					37.5373	74.073	186
475	3.14954	402.192	0.14902	0.295525	0.738451	#REF!	#REF!	#REF!					38	75.359	188.305
476	3.14754	402.448	0.14902	0.294678	0.741176	#REF!	#REF!	#REF!					38	75.143	189
477	3.14553	402.704	0.14902	0.287016	0.729141	#REF!	#REF!	#REF!					38	73.189	185.931
478	3.14353	402.96	0.152026	0.281973	0.72549	#REF!	#REF!	#REF!					38.7667	71.903	185
479	3.14153	403.217	0.152941	0.288953	0.746525	#REF!	#REF!	#REF!					39	73.683	190.364
480	3.13953	403.474	0.152941	0.291322	0.752941	#REF!	#REF!	#REF!					39	74.287	192
481	3.13753	403.731	0.152941	0.288224	0.755941	#REF!	#REF!	#REF!					39	73.497	192.765
482	3.13553	403.989	0.158939	0.290922	0.756863	#REF!	#REF!	#REF!					40.5295	74.185	193
483	3.13353	404.247	0.160784	0.291875	0.762859	#REF!	#REF!	#REF!					41	74.428	194.529
484	3.13153	404.505	0.160784	0.290545	0.764706	#REF!	#REF!	#REF!					41	74.089	195
485	3.12953	404.764	0.160784	0.296184	0.767698	#REF!	#REF!	#REF!					41	75.527	195.763
486	3.12753	405.023	0.157793	0.301031	0.768627	#REF!	#REF!	#REF!					40.2372	76.763	196
487	3.12552	405.282	0.156863	0.298973	0.777596	#REF!	#REF!	#REF!					40	76.238	198.287
488	3.12352	405.542	0.153875	0.300753	0.780392	#REF!	#REF!	#REF!					39.2382	76.692	199
489	3.12152	405.802	0.152941	0.298914	0.771435	#REF!	#REF!	#REF!					39	76.223	196.716
490	3.11952	406.062	0.155925	0.298039	0.768627	#REF!	#REF!	#REF!					39.7609	76	196
491	3.11752	406.323	0.156863	0.298039	0.777573	#REF!	#REF!	#REF!					40	76	198.281
492	3.11552	406.584	0.159843	0.298039	0.780278	#REF!	#REF!	#REF!					40.7599	76	198.971
493	3.11352	406.845	0.160784	0.29822	0.783318	#REF!	#REF!	#REF!					41	76.046	199.746
494	3.11152	407.107	0.1608	0.30442	0.784529	#REF!	#REF!	#REF!					41.0039	77.627	200.055
495	3.10952	407.369	0.160606	0.306267	0.798318	#REF!	#REF!	#REF!					40.9546	78.098	203.571
496	3.10752	407.631	0.154985	0.303318	0.802298	#REF!	#REF!	#REF!					39.5211	77.346	204.586
497	3.10551	407.894	0.153326	0.307643	0.800776	#REF!	#REF!	#REF!					39.0981	78.449	204.198
498	3.10351	408.157	0.15083	0.306239	0.799741	#REF!	#REF!	#REF!					38.4617	78.091	203.934
499	3.10151	408.42	0.150202	0.302224	0.796282	#REF!	#REF!	#REF!					38.3016	77.067	203.052
500	3.09951	408.684	0.166096	0.304137	0.79529	#REF!	#REF!	#REF!					42.3545	77.555	202.799
501	3.09751	408.948	0.170953	0.302035	0.803125	#REF!	#REF!	#REF!					43.593	77.019	204.797
502	3.09551	409.212	0.163905	0.29802	0.805882	#REF!	#REF!	#REF!					41.7959	75.995	205.5
503	3.09351	409.477	0.161789	0.2994	0.803925	#REF!	#REF!	#REF!					41.2562	76.347	205.001
504	3.09151	409.742	0.168642	0.303337	0.803514	#REF!	#REF!	#REF!					43.0037	77.351	204.896
505	3.08951	410.007	0.171051	0.301631	0.815714	#REF!	#REF!	#REF!					43.6179	76.916	208.007
506	3.08751	410.273	0.163371	0.305478	0.819608	#REF!	#REF!	#REF!					41.6595	77.897	209
507	3.08551	410.539	0.160784	0.309839	0.823729	#REF!	#REF!	#REF!					41	79.009	210.051
508	3.0835	410.805	0.169632	0.309447	0.824416	#REF!	#REF!	#REF!					43.2562	78.909	210.226
509	3.0815	411.072	0.172549	0.3066	0.825922	#REF!	#REF!	#REF!					44	78.183	210.61
510	3.0795	411.339	0.168655	0.299992	0.825682	#REF!	#REF!	#REF!					43.007	76.498	210.549
511	3.0775	411.607	0.167054	0.296478	0.820039	#REF!	#REF!	#REF!					42.5988	75.602	209.11
512	3.0755	411.874	0.166744	0.298996	0.817816	#REF!	#REF!	#REF!					42.5198	76.244	208.543
513	3.0735	412.142	0.166434	0.303012	0.816161	#REF!	#REF!	#REF!					42.4407	77.268	208.121
514	3.0715	412.411	0.169333	0.298212	0.81602	#REF!	#REF!	#REF!					43.1799	76.044	208.085
515	3.0695	412.68	0.170304	0.297612	0.844694	#REF!	#REF!	#REF!					43.4275	75.891	215.397
516	3.0675	412.949	0.174892	0.298039	0.854737	#REF!	#REF!	#REF!					44.5974	76	217.958
517	3.0655	413.219	0.176471	0.296231	0.831506	#REF!	#REF!	#REF!					45	75.539	212.034
518	3.06349	413.488	0.169722	0.292596	0.822259	#REF!	#REF!	#REF!					43.2792	74.612	209.676
519	3.06149	413.759	0.167232	0.288584	0.830714	#REF!	#REF!	#REF!					42.6442	73.589	211.832
520	3.05949	414.029	0.175269	0.296275	0.833812	#REF!	#REF!	#REF!					44.6936	75.55	212.622
521	3.05749	414.3	0.178279	0.301251	0.838204	#REF!	#REF!	#REF!					45.4612	76.819	213.742
522	3.05549	414.572	0.175482	0.302725	0.840055	#REF!	#REF!	#REF!					44.7479	77.195	214.214
523	3.05349	414.843	0.174249	0.299278	0.842973	#REF!	#REF!	#REF!					44.4334	76.316	214.958
524	3.05149	415.115	0.182384	0.295741	0.843396	#REF!	#REF!	#REF!					46.5078	75.414	215.066
525	3.04949	415.388	0.185663	0.297776	0.8378	#REF!	#REF!	#REF!					47.3441	75.933	213.639
526	3.04749	415.66	0.178936	0.292855	0.835937	#REF!	#REF!	#REF!					45.6288	74.678	213.164
527	3.04549	415.934	0.176471	0.293251	0.845047	#REF!	#REF!	#REF!					45	74.779	215.487
528	3.04348	416.207	0.176965	0.29669	0.848714	#REF!	#REF!	#REF!					45.1261	75.656	216.422
529	3.04148	416.481	0.17693	0.292659	0.842322	#REF!	#REF!	#REF!					45.1171	74.628	214.792
530	3.03948	416.755	0.185258	0.290722	0.839741	#REF!	#REF!	#REF!					47.2407	74.134	214.134
531	3.03748	417.03	0.188235	0.290404	0.845235	#REF!	#REF!	#REF!					48	74.053	215.535
532	3.03548	417.304	0.185332	0.290267	0.847129	#REF!	#REF!	#REF!					47.2596	74.018	216.018
533	3.03348	417.58	0.184314	0.298875	0.838353	#REF!	#REF!	#REF!					47	76.213	213.78
534	3.03148	417.855	0.184314	0.299031	0.835294	#REF!	#REF!	#REF!					47	76.253	213
535	3.02948	418.131	0.184314	0.295141	0.855576	#REF!	#REF!	#REF!					47	75.261	218.172
536	3.02748	418.408	0.190105	0.291224	0.862745	#REF!	#REF!	#REF!					48.4768	74.262	220
537	3.02548	418.684	0.192157	0.284408	0.874322	#REF!	#REF!	#REF!					49	72.524	222.952
538	3.02347	418.961	0.195049	0.290659	0.878431	#REF!	#REF!	#REF!					49.7374	74.118	224
539	3.02147	419.239	0.196078	0.293961	0.86109	#REF!	#REF!	#REF!					50	74.96	219.578
540	3.01947	419.517	0.181638	0.291231	0.854902	#REF!	#REF!	#REF!					46.3177	74.264	218
541	3.01747	419.795	0.176471	0.290776	0.857788	#REF!	#REF!	#REF!					45	74.148	218.736
542	3.01547	420.074	0.190892	0.288851	0.858824	#REF!	#REF!	#REF!					48.6774	73.657	219
543	3.01347	420.352	0.196078	0.287518	0.855941	#REF!	#REF!	#REF!					50	73.317	218.265
544	3.01147	420.632	0.196078	0.290737	0.854902	#REF!	#REF!	#REF!					50	74.138	218
545	3.00947	420.911	0.196078	0.288894	0.834753	#REF!	#REF!	#REF!					50	73.668	212.862
546	3.00747	421.191	0.187449	0.285627	0.827451	#REF!	#REF!	#REF!					47.7994	72.835	211
547	3.00547	421.472	0.184314	0.282208	0.836075	#REF!	#REF!	#REF!					47	71.963	213.199
548	3.00347	421.753	0.190059	0.279212	0.839216	#REF!	#REF!	#REF!					48.4651	71.199	214
549	3.00146	422.034	0.192157	0.278431	0.836345	#REF!	#REF!	#REF!					49	71	213.268
550	2.99946	422.315	0.189288	0.279639	0.835294	#REF!	#REF!	#REF!					48.2684	71.308	213
551	2.99746	422.597	0.188235	0.283047	0.849627	#REF!	#REF!	#REF!					48	72.177	216.655
552	2.99546	422.88	0.1911	0.278639	0.854902	#REF!	#REF!	#REF!					48.7306	71.053	218
553	2.99346	423.162	0.192157	0.273627	0.829133	#REF!	#REF!	#REF!					49	69.775	211.429
554	2.99146	423.445	0.186435	0.275443	0.819608	#REF!	#REF!	#REF!					47.5408	70.238	209
555	2.98946	423.729	0.184314	0.276639	0.831047	#REF!	#REF!	#REF!					47	70.543	211.917
556	2.98746	424.013	0.192886	0.273878	0.835294	#REF!	#REF!	#REF!					49.1859	69.839	213
557	2.98546	424.297	0.196078	0.27291	0.852427	#REF!	#REF!	#REF!					50	69.592	217.369
558	2.98346	424.581	0.198932	0.271247	0.858824	#REF!	#REF!	#REF!					50.7277	69.168	219
559	2.98145	424.866	0.2	0.271612	0.858824	#REF!	#REF!	#REF!					51	69.261	219
560	2.97945	425.152	0.2	0.2776	0.858824	#REF!	#REF!	#REF!					51	70.788	219
561	2.97745	425.437	0.2	0.274835	0.850278	#REF!	#REF!	#REF!					51	70.083	216.821
562	2.97545	425.723	0.197154	0.271204	0.847059	#REF!	#REF!	#REF!					50.2743	69.157	216
563	2.97345	426.01	0.196078	0.270588	0.841373	#REF!	#REF!	#REF!					50	69	214.55
564	2.97145	426.297	0.196078	0.272082	0.839216	#REF!	#REF!	#REF!					50	69.381	214
565	2.96945	426.584	0.196078	0.270604	0.844898	#REF!	#REF!	#REF!					50	69.004	215.449
566	2.96745	426.872	0.196078	0.267545	0.847059	#REF!	#REF!	#REF!					50	68.224	216
567	2.96545	427.16	0.196078	0.266667	0.847059	#REF!	#REF!	#REF!					50	68	216
568	2.96345	427.448	0.198913	0.264227	0.847059	#REF!	#REF!	#REF!					50.7228	67.378	216
569	2.96144	427.737	0.2	0.266027	0.8244	#REF!	#REF!	#REF!					51	67.837	210.222
570	2.95944	428.026	0.199938	0.264706	0.815686	#REF!	#REF!	#REF!					50.9841	67.5	208
571	2.95744	428.316	0.199811	0.26051	0.838318	#REF!	#REF!	#REF!					50.9517	66.43	213.771
572	2.95544	428.606	0.210592	0.264451	0.847059	#REF!	#REF!	#REF!					53.701	67.435	216
573	2.95344	428.896	0.214498	0.272247	0.841408	#REF!	#REF!	#REF!					54.6969	69.423	214.559
574	2.95144	429.187	0.201871	0.266031	0.839243	#REF!	#REF!	#REF!					51.477	67.838	214.007
575	2.94944	429.478	0.197284	0.260012	0.820118	#REF!	#REF!	#REF!					50.3075	66.303	209.13
576	2.94744	429.77	0.203918	0.261863	0.81329	#REF!	#REF!	#REF!					51.999	66.775	207.389
577	2.94544	430.062	0.206224	0.265651	0.822188	#REF!	#REF!	#REF!					52.5871	67.741	209.658
578	2.94344	430.354	0.198033	0.266667	0.825988	#REF!	#REF!	#REF!					50.4984	68	210.627
579	2.94143	430.647	0.195206	0.266306	0.830012	#REF!	#REF!	#REF!					49.7775	67.908	211.653
580	2.93943	430.94	0.206362	0.263686	0.831373	#REF!	#REF!	#REF!					52.6224	67.24	212
581	2.93743	431.234	0.210542	0.260435	0.824941	#REF!	#REF!	#REF!					53.6881	66.411	210.36
582	2.93543	431.527	0.211306	0.262424	0.822776	#REF!	#REF!	#REF!					53.883	66.918	209.808
583	2.93343	431.822	0.21103	0.261725	0.832106	#REF!	#REF!	#REF!					53.8126	66.74	212.187
584	2.93143	432.117	0.20809	0.255169	0.835282	#REF!	#REF!	#REF!					53.063	65.068	212.997
585	2.92943	432.412	0.206856	0.254286	0.830067	#REF!	#REF!	#REF!					52.7482	64.843	211.667
586	2.92743	432.707	0.204356	0.257702	0.827847	#REF!	#REF!	#REF!					52.1109	65.714	211.101
587	2.92543	433.003	0.203686	0.258824	0.828467	#REF!	#REF!	#REF!					51.94	66	211.259
588	2.92343	433.3	0.216465	0.258824	0.828639	#REF!	#REF!	#REF!					55.1987	66	211.303
589	2.92143	433.596	0.221836	0.257071	0.823522	#REF!	#REF!	#REF!					56.5681	65.553	209.998
590	2.91942	433.894	0.210428	0.253667	0.821918	#REF!	#REF!	#REF!					53.6592	64.685	209.589
591	2.91742	434.191	0.205587	0.255424	0.814502	#REF!	#REF!	#REF!					52.4246	65.133	207.698
592	2.91542	434.489	0.213849	0.256651	0.810863	#REF!	#REF!	#REF!					54.5315	65.446	206.77
593	2.91342	434.788	0.217145	0.251173	0.806937	#REF!	#REF!	#REF!					55.3719	64.049	205.769
594	2.91142	435.086	0.21223	0.249	0.805824	#REF!	#REF!	#REF!					54.1187	63.495	205.485
595	2.90942	435.386	0.21068	0.247651	0.807447	#REF!	#REF!	#REF!					53.7233	63.151	205.899
596	2.90742	435.685	0.215979	0.247059	0.808184	#REF!	#REF!	#REF!					55.0746	63	206.087
597	2.90542	435.985	0.217776	0.248259	0.813871	#REF!	#REF!	#REF!					55.5329	63.306	207.537
598	2.90342	436.286	0.211349	0.248659	0.816988	#REF!	#REF!	#REF!					53.8939	63.408	208.332
599	2.90142	436.587	0.208682	0.245784	0.811831	#REF!	#REF!	#REF!					53.2138	62.675	207.017
600	2.89941	436.888	0.214125	0.241773	0.809251	#REF!	#REF!	#REF!					54.6018	61.652	206.359
601	2.89741	437.19	0.216318	0.244216	0.786075	#REF!	#REF!	#REF!					55.1611	62.275	200.449
602	2.89541	437.492	0.223031	0.248612	0.775918	#REF!	#REF!	#REF!					56.8728	63.396	197.859
603	2.89341	437.794	0.226176	0.249859	0.77851	#REF!	#REF!	#REF!					57.675	63.714	198.52
604	2.89141	438.097	0.216558	0.247192	0.779541	#REF!	#REF!	#REF!					55.2222	63.034	198.783
605	2.88941	438.401	0.212201	0.24402	0.776639	#REF!	#REF!	#REF!					54.1113	62.225	198.043
606	2.88741	438.705	0.22816	0.243137	0.775639	#REF!	#REF!	#REF!					58.1809	62	197.788
607	2.88541	439.009	0.23526	0.243655	0.78229	#REF!	#REF!	#REF!					59.9912	62.132	199.484
608	2.88341	439.314	0.224262	0.243329	0.784953	#REF!	#REF!	#REF!					57.1869	62.049	200.163
609	2.88141	439.619	0.219608	0.240765	0.787306	#REF!	#REF!	#REF!					56	61.395	200.763
610	2.8794	439.924	0.219608	0.24242	0.789008	#REF!	#REF!	#REF!					56	61.817	201.197
611	2.8774	440.23	0.219608	0.24349	0.781153	#REF!	#REF!	#REF!					56	62.09	199.194
612	2.8754	440.536	0.225108	0.243396	0.777247	#REF!	#REF!	#REF!					57.4026	62.066	198.198
613	2.8734	440.843	0.227451	0.243184	0.777302	#REF!	#REF!	#REF!					58	62.012	198.212
614	2.8714	441.15	0.224705	0.240392	0.776871	#REF!	#REF!	#REF!					57.2997	61.3	198.102
615	2.8694	441.458	0.223529	0.239196	0.795682	#REF!	#REF!	#REF!					57	60.995	202.899
616	2.8674	441.766	0.220787	0.23909	0.803922	#REF!	#REF!	#REF!					56.3006	60.968	205
617	2.8654	442.075	0.219608	0.238996	0.773773	#REF!	#REF!	#REF!					56	60.944	197.312
618	2.8634	442.384	0.227824	0.23638	0.760784	#REF!	#REF!	#REF!					58.0952	60.277	194
619	2.8614	442.693	0.231373	0.235294	0.758047	#REF!	#REF!	#REF!					59	60	193.302
620	2.85939	443.003	0.231373	0.236	0.756863	#REF!	#REF!	#REF!					59	60.18	193
621	2.85739	443.313	0.231373	0.239231	0.762329	#REF!	#REF!	#REF!					59	61.004	194.394
622	2.85539	443.624	0.228642	0.240125	0.764706	#REF!	#REF!	#REF!					58.3036	61.232	195
623	2.85339	443.935	0.227451	0.237282	0.778353	#REF!	#REF!	#REF!					58	60.507	198.48
624	2.85139	444.246	0.224724	0.232839	0.784314	#REF!	#REF!	#REF!					57.3045	59.374	200
625	2.84939	444.558	0.223529	0.231373	0.776137	#REF!	#REF!	#REF!					57	59	197.915
626	2.84739	444.871	0.2317	0.235596	0.772549	#REF!	#REF!	#REF!					59.0835	60.077	197
627	2.84539	445.183	0.235294	0.234925	0.772549	#REF!	#REF!	#REF!					60	59.906	197
628	2.84339	445.497	0.221696	0.232153	0.772549	#REF!	#REF!	#REF!					56.5325	59.199	197
629	2.84139	445.81	0.215686	0.23409	0.756243	#REF!	#REF!	#REF!					55	59.693	192.842
630	2.83939	446.125	0.231981	0.237682	0.74902	#REF!	#REF!	#REF!					59.1552	60.609	191
631	2.83738	446.439	0.239216	0.233031	0.754447	#REF!	#REF!	#REF!					61	59.423	192.384
632	2.83538	446.754	0.236504	0.229906	0.756863	#REF!	#REF!	#REF!					60.3084	58.626	193
633	2.83338	447.07	0.235294	0.235043	0.743314	#REF!	#REF!	#REF!					60	59.936	189.545
634	2.83138	447.386	0.240711	0.237212	0.737255	#REF!	#REF!	#REF!					61.3812	60.489	188
635	2.82938	447.702	0.243137	0.231824	0.742667	#REF!	#REF!	#REF!					62	59.115	189.38
636	2.82738	448.019	0.235024	0.228192	0.745098	#REF!	#REF!	#REF!					59.9312	58.189	190
637	2.82538	448.336	0.231373	0.229027	0.753204	#REF!	#REF!	#REF!					59	58.402	192.067
638	2.82338	448.654	0.236774	0.229682	0.756863	#REF!	#REF!	#REF!					60.3773	58.569	193
639	2.82138	448.972	0.239216	0.232475	0.746067	#REF!	#REF!	#REF!					61	59.281	190.247
640	2.81938	449.291	0.244609	0.231098	0.741176	#REF!	#REF!	#REF!					62.3753	58.93	189
641	2.81737	449.61	0.247059	0.229969	0.714227	#REF!	#REF!	#REF!					63	58.642	182.128
642	2.81537	449.929	0.236287	0.230961	0.701961	#REF!	#REF!	#REF!					60.2533	58.895	179
643	2.81337	450.25	0.231373	0.228682	0.72349	#REF!	#REF!	#REF!					59	58.314	184.49
644	2.81137	450.57	0.244818	0.228608	0.733333	#REF!	#REF!	#REF!					62.4285	58.295	187
645	2.80937	450.891	0.25098	0.230027	0.730647	#REF!	#REF!	#REF!					64	58.657	186.315
646	2.80737	451.212	0.250785	0.228396	0.729412	#REF!	#REF!	#REF!					63.9502	58.241	186
647	2.80537	451.534	0.250578	0.224769	0.734776	#REF!	#REF!	#REF!					63.8975	57.316	187.368
648	2.80337	451.856	0.243368	0.226714	0.737255	#REF!	#REF!	#REF!					62.0588	57.812	188
649	2.80137	452.179	0.240439	0.230769	0.731894	#REF!	#REF!	#REF!					61.3119	58.846	186.633
650	2.79937	452.502	0.241098	0.229239	0.729412	#REF!	#REF!	#REF!					61.4799	58.456	186
651	2.79736	452.826	0.241673	0.230573	0.721384	#REF!	#REF!	#REF!					61.6266	58.796	183.953
652	2.79536	453.15	0.241108	0.229051	0.717647	#REF!	#REF!	#REF!					61.4825	58.408	183
653	2.79336	453.475	0.240858	0.227706	0.701616	#REF!	#REF!	#REF!					61.4187	58.065	178.912
654	2.79136	453.8	0.246557	0.230173	0.694118	#REF!	#REF!	#REF!					62.872	58.694	177
655	2.78936	454.125	0.248925	0.231373	0.694118	#REF!	#REF!	#REF!					63.4758	59	177
656	2.78736	454.451	0.251384	0.234008	0.694302	#REF!	#REF!	#REF!					64.103	59.672	177.047
657	2.78536	454.778	0.252433	0.230012	0.704933	#REF!	#REF!	#REF!					64.3704	58.653	179.758
658	2.78336	455.105	0.251318	0.225012	0.70958	#REF!	#REF!	#REF!					64.0861	57.378	180.943
659	2.78136	455.432	0.250578	0.228737	0.689282	#REF!	#REF!	#REF!					63.8975	58.328	175.767
660	2.77936	455.76	0.256632	0.22858	0.680086	#REF!	#REF!	#REF!					65.4412	58.288	173.422
661	2.77735	456.088	0.259449	0.225141	0.691439	#REF!	#REF!	#REF!					66.1596	57.411	176.317
662	2.77535	456.417	0.260144	0.224133	0.697141	#REF!	#REF!	#REF!					66.3368	57.154	177.771
663	2.77335	456.747	0.260678	0.224231	0.690137	#REF!	#REF!	#REF!					66.4729	57.179	175.985
664	2.77135	457.076	0.255484	0.224325	0.687129	#REF!	#REF!	#REF!					65.1484	57.203	175.218
665	2.76935	457.407	0.252841	0.225867	0.696733	#REF!	#REF!	#REF!					64.4744	57.596	177.667
666	2.76735	457.737	0.257671	0.229776	0.700973	#REF!	#REF!	#REF!					65.706	58.593	178.748
667	2.76535	458.069	0.260667	0.237847	0.685737	#REF!	#REF!	#REF!					66.47	60.651	174.863
668	2.76335	458.4	0.260671	0.238137	0.678431	#REF!	#REF!	#REF!					66.4712	60.725	173
669	2.76135	458.732	0.260271	0.2296	0.681867	#REF!	#REF!	#REF!					66.369	58.548	173.876
670	2.75935	459.065	0.264615	0.227004	0.683914	#REF!	#REF!	#REF!					67.4768	57.886	174.398
671	2.75735	459.398	0.266466	0.227773	0.67838	#REF!	#REF!	#REF!					67.9488	58.082	172.987
672	2.75534	459.732	0.258593	0.227165	0.67531	#REF!	#REF!	#REF!					65.9412	57.927	172.204
673	2.75334	460.066	0.254902	0.227251	0.6746	#REF!	#REF!	#REF!					65	57.949	172.023
674	2.75134	460.401	0.258293	0.22482	0.675016	#REF!	#REF!	#REF!					65.8646	57.329	172.129
675	2.74934	460.736	0.260265	0.220898	0.677827	#REF!	#REF!	#REF!					66.3675	56.329	172.846
676	2.74734	461.071	0.265345	0.223537	0.678498	#REF!	#REF!	#REF!					67.6631	57.002	173.017
677	2.74534	461.407	0.268108	0.226827	0.682212	#REF!	#REF!	#REF!					68.3675	57.841	173.964
678	2.74334	461.744	0.269904	0.224827	0.684137	#REF!	#REF!	#REF!					68.8256	57.331	174.455
679	2.74134	462.081	0.270588	0.224659	0.666455	#REF!	#REF!	#REF!					69	57.288	169.946
680	2.73934	462.418	0.260108	0.226678	0.657357	#REF!	#REF!	#REF!					66.3275	57.803	167.626
681	2.73734	462.756	0.254902	0.228451	0.667914	#REF!	#REF!	#REF!					65	58.255	170.318
682	2.73533	463.095	0.260135	0.228855	0.673937	#REF!	#REF!	#REF!					66.3343	58.358	171.854
683	2.73333	463.434	0.262745	0.229631	0.659694	#REF!	#REF!	#REF!					67	58.556	168.222
684	2.73133	463.773	0.265358	0.227549	0.652192	#REF!	#REF!	#REF!					67.6662	58.025	166.309
685	2.72933	464.113	0.266667	0.224467	0.657698	#REF!	#REF!	#REF!					68	57.239	167.713
686	2.72733	464.454	0.269275	0.228745	0.660706	#REF!	#REF!	#REF!					68.6652	58.33	168.48
687	2.72533	464.795	0.270588	0.23398	0.64909	#REF!	#REF!	#REF!					69	59.665	165.518
688	2.72333	465.137	0.275798	0.235294	0.643137	#REF!	#REF!	#REF!					70.3285	60	164
689	2.72133	465.479	0.278431	0.237898	0.641361	#REF!	#REF!	#REF!					71	60.664	163.547
690	2.71933	465.821	0.27583	0.236616	0.641322	#REF!	#REF!	#REF!					70.3367	60.337	163.537
691	2.71733	466.164	0.27451	0.232694	0.627494	#REF!	#REF!	#REF!					70	59.337	160.011
692	2.71532	466.508	0.261524	0.233969	0.619255	#REF!	#REF!	#REF!					66.6886	59.662	157.91
693	2.71332	466.852	0.254902	0.233161	0.633412	#REF!	#REF!	#REF!					65	59.456	161.52
694	2.71132	467.196	0.275649	0.234306	0.641612	#REF!	#REF!	#REF!					70.2904	59.748	163.611
695	2.70932	467.541	0.286275	0.237835	0.622502	#REF!	#REF!	#REF!					73	60.648	158.738
696	2.70732	467.887	0.286275	0.241702	0.612016	#REF!	#REF!	#REF!					73	61.634	156.064
697	2.70532	468.233	0.286275	0.237929	0.622114	#REF!	#REF!	#REF!					73	60.672	158.639
698	2.70332	468.579	0.283689	0.232667	0.627451	#REF!	#REF!	#REF!					72.3407	59.33	160
699	2.70132	468.927	0.282353	0.231522	0.611949	#REF!	#REF!	#REF!					72	59.038	156.047
700	2.69932	469.274	0.282353	0.233855	0.603922	#REF!	#REF!	#REF!					72	59.633	154
701	2.69732	469.622	0.282353	0.232298	0.606502	#REF!	#REF!	#REF!					72	59.236	154.658
702	2.69531	469.971	0.287509	0.226376	0.607843	#REF!	#REF!	#REF!					73.3148	57.726	155
703	2.69331	470.32	0.290196	0.231863	0.60269	#REF!	#REF!	#REF!					74	59.125	153.686
704	2.69131	470.67	0.295344	0.235537	0.6	#REF!	#REF!	#REF!					75.3128	60.062	153
705	2.68931	471.02	0.298039	0.233247	0.597427	#REF!	#REF!	#REF!					76	59.478	152.344
706	2.68731	471.371	0.287758	0.239392	0.596078	#REF!	#REF!	#REF!					73.3782	61.045	152
707	2.68531	471.722	0.282353	0.243137	0.59351	#REF!	#REF!	#REF!					72	62	151.345
708	2.68331	472.074	0.279786	0.239859	0.592157	#REF!	#REF!	#REF!					71.3455	61.164	151
709	2.68131	472.426	0.278431	0.2406	0.594722	#REF!	#REF!	#REF!					71	61.353	151.654
710	2.67931	472.779	0.283557	0.239239	0.596078	#REF!	#REF!	#REF!					72.307	61.006	152
711	2.67731	473.132	0.286275	0.238039	0.583275	#REF!	#REF!	#REF!					73	60.7	148.735
712	2.67531	473.486	0.281157	0.238875	0.576471	#REF!	#REF!	#REF!					71.695	60.913	147
713	2.6733	473.84	0.278431	0.239216	0.571357	#REF!	#REF!	#REF!					71	61	145.696
714	2.6713	474.195	0.283542	0.237741	0.568627	#REF!	#REF!	#REF!					72.3031	60.624	145
715	2.6693	474.551	0.286275	0.237051	0.576286	#REF!	#REF!	#REF!					73	60.448	146.953
716	2.6673	474.907	0.286275	0.241043	0.580392	#REF!	#REF!	#REF!					73	61.466	148
717	2.6653	475.263	0.286275	0.246953	0.565098	#REF!	#REF!	#REF!					73	62.973	144.1
718	2.6633	475.62	0.293917	0.247773	0.556863	#REF!	#REF!	#REF!					74.9488	63.182	142
719	2.6613	475.978	0.298039	0.244514	0.549227	#REF!	#REF!	#REF!					76	62.351	140.053
720	2.6593	476.336	0.303126	0.243137	0.545098	#REF!	#REF!	#REF!					77.2972	62	139
721	2.6573	476.695	0.305865	0.24671	0.55018	#REF!	#REF!	#REF!					77.9956	62.911	140.296
722	2.6553	477.054	0.298148	0.251698	0.552941	#REF!	#REF!	#REF!					76.0277	64.183	141
723	2.65329	477.414	0.294118	0.253502	0.537714	#REF!	#REF!	#REF!					75	64.643	137.117
724	2.65129	477.774	0.296449	0.256133	0.529412	#REF!	#REF!	#REF!					75.5946	65.314	135
725	2.64929	478.135	0.29762	0.255078	0.55222	#REF!	#REF!	#REF!					75.8931	65.045	140.816
726	2.64729	478.496	0.295997	0.251255	0.564706	#REF!	#REF!	#REF!					75.4792	64.07	144
727	2.64529	478.858	0.295369	0.249961	0.557114	#REF!	#REF!	#REF!					75.3192	63.74	142.064
728	2.64329	479.221	0.298752	0.24738	0.552941	#REF!	#REF!	#REF!					76.1818	63.082	141
729	2.64129	479.584	0.300296	0.248145	0.530204	#REF!	#REF!	#REF!					76.5754	63.277	135.202
730	2.63929	479.948	0.294323	0.250835	0.517647	#REF!	#REF!	#REF!					75.0524	63.963	132
731	2.63729	480.312	0.291235	0.252024	0.53278	#REF!	#REF!	#REF!					74.265	64.266	135.859
732	2.63529	480.676	0.299952	0.25858	0.541176	#REF!	#REF!	#REF!					76.4878	65.938	138
733	2.63328	481.042	0.304636	0.259784	0.528584	#REF!	#REF!	#REF!					77.6823	66.245	134.789
734	2.63128	481.407	0.298715	0.254114	0.521569	#REF!	#REF!	#REF!					76.1722	64.799	133
735	2.62928	481.774	0.29557	0.251486	0.524082	#REF!	#REF!	#REF!					75.3704	64.129	133.641
736	2.62728	482.141	0.297189	0.25602	0.52549	#REF!	#REF!	#REF!					75.7833	65.285	134
737	2.62528	482.508	0.298039	0.261275	0.52549	#REF!	#REF!	#REF!					76	66.625	134
738	2.62328	482.876	0.303057	0.26522	0.525388	#REF!	#REF!	#REF!					77.2796	67.631	133.974
739	2.62128	483.245	0.305882	0.26662	0.512647	#REF!	#REF!	#REF!					78	67.988	130.725
740	2.61928	483.614	0.304624	0.264161	0.505431	#REF!	#REF!	#REF!					77.6792	67.361	128.885
741	2.61728	483.984	0.30381	0.264839	0.518208	#REF!	#REF!	#REF!					77.4715	67.534	132.143
742	2.61528	484.354	0.308145	0.270569	0.524404	#REF!	#REF!	#REF!					78.577	68.995	133.723
743	2.61327	484.725	0.311078	0.273624	0.498165	#REF!	#REF!	#REF!					79.325	69.774	127.032
744	2.61127	485.096	0.308899	0.269294	0.48418	#REF!	#REF!	#REF!					78.7693	68.67	123.466
745	2.60927	485.468	0.307318	0.26462	0.482675	#REF!	#REF!	#REF!					78.366	67.478	123.082
746	2.60727	485.841	0.321283	0.271027	0.481553	#REF!	#REF!	#REF!					81.9271	69.112	122.796
747	2.60527	486.214	0.329647	0.27982	0.471275	#REF!	#REF!	#REF!					84.06	71.354	120.175
748	2.60327	486.588	0.325345	0.279863	0.465718	#REF!	#REF!	#REF!					82.9631	71.365	118.758
749	2.60127	486.962	0.322591	0.275945	0.469184	#REF!	#REF!	#REF!					82.2606	70.366	119.642
750	2.59927	487.337	0.312543	0.273761	0.471396	#REF!	#REF!	#REF!					79.6984	69.809	120.206
751	2.59727	487.712	0.306698	0.269882	0.458494	#REF!	#REF!	#REF!					78.2079	68.82	116.916
752	2.59527	488.089	0.31201	0.268039	0.45138	#REF!	#REF!	#REF!					79.5625	68.35	115.102
753	2.59327	488.465	0.314943	0.272169	0.449169	#REF!	#REF!	#REF!					80.3104	69.403	114.538
754	2.59126	488.842	0.310098	0.276	0.447835	#REF!	#REF!	#REF!					79.0751	70.38	114.198
755	2.58926	489.22	0.307088	0.274965	0.449925	#REF!	#REF!	#REF!					78.3075	70.116	114.731
756	2.58726	489.598	0.308687	0.279051	0.45098	#REF!	#REF!	#REF!					78.7153	71.158	115
757	2.58526	489.977	0.309804	0.282545	0.443561	#REF!	#REF!	#REF!					79	72.049	113.108
758	2.58326	490.357	0.312217	0.282404	0.439216	#REF!	#REF!	#REF!					79.6153	72.013	112
759	2.58126	490.737	0.313725	0.283518	0.438902	#REF!	#REF!	#REF!					80	72.297	111.92
760	2.57926	491.118	0.313725	0.282027	0.438141	#REF!	#REF!	#REF!					80	71.917	111.726
761	2.57726	491.499	0.313725	0.281725	0.434388	#REF!	#REF!	#REF!					80	71.84	110.769
762	2.57526	491.881	0.311262	0.284816	0.432224	#REF!	#REF!	#REF!					79.3719	72.628	110.217
763	2.57326	492.263	0.309804	0.287796	0.422443	#REF!	#REF!	#REF!					79	73.388	107.723
764	2.57125	492.647	0.304885	0.288796	0.416239	#REF!	#REF!	#REF!					77.7457	73.643	106.141
765	2.56925	493.03	0.301961	0.288894	0.42878	#REF!	#REF!	#REF!					77	73.668	109.339
766	2.56725	493.415	0.311783	0.289745	0.436502	#REF!	#REF!	#REF!					79.5046	73.885	111.308
767	2.56525	493.799	0.317647	0.291953	0.4252	#REF!	#REF!	#REF!					81	74.448	108.426
768	2.56325	494.185	0.315195	0.298004	0.418592	#REF!	#REF!	#REF!					80.3748	75.991	106.741
769	2.56125	494.571	0.313725	0.301616	0.410039	#REF!	#REF!	#REF!					80	76.912	104.56
770	2.55925	494.958	0.316173	0.301961	0.404745	#REF!	#REF!	#REF!					80.6242	77	103.21
771	2.55725	495.345	0.317647	0.301961	0.402831	#REF!	#REF!	#REF!					81	77	102.722
772	2.55525	495.733	0.317647	0.301565	0.40202	#REF!	#REF!	#REF!					81	76.899	102.515
773	2.55325	496.121	0.317647	0.299651	0.404749	#REF!	#REF!	#REF!					81	76.411	103.211
774	2.55124	496.51	0.312767	0.300922	0.406518	#REF!	#REF!	#REF!					79.7555	76.735	103.662
775	2.54924	496.9	0.309804	0.306537	0.397482	#REF!	#REF!	#REF!					79	78.167	101.358
776	2.54724	497.29	0.314677	0.311737	0.391906	#REF!	#REF!	#REF!					80.2426	79.493	99.936
777	2.54524	497.681	0.317647	0.311078	0.387227	#REF!	#REF!	#REF!					81	79.325	98.743
778	2.54324	498.073	0.310349	0.304878	0.384314	#REF!	#REF!	#REF!					79.1391	77.744	98
779	2.54124	498.465	0.305882	0.301925	0.384314	#REF!	#REF!	#REF!					78	76.991	98
780	2.53924	498.858	0.320455	0.306769	0.384314	#REF!	#REF!	#REF!					81.716	78.226	98
781	2.53724	499.251	0.329412	0.312231	0.381886	#REF!	#REF!	#REF!					84	79.619	97.381
782	2.53524	499.645	0.312437	0.311302	0.380392	#REF!	#REF!	#REF!					79.6715	79.382	97
783	2.53324	500.04	0.301961	0.312227	0.375545	#REF!	#REF!	#REF!					77	79.618	95.764
784	2.53123	500.435	0.306803	0.315827	0.372549	#REF!	#REF!	#REF!					78.2347	80.536	95
785	2.52923	500.831	0.309804	0.314616	0.36771	#REF!	#REF!	#REF!					79	80.227	93.766
786	2.52723	501.228	0.300135	0.315	0.364706	#REF!	#REF!	#REF!					76.5344	80.325	93
787	2.52523	501.625	0.294118	0.314122	0.359875	#REF!	#REF!	#REF!					75	80.101	91.768
788	2.52323	502.023	0.313425	0.31338	0.356863	#REF!	#REF!	#REF!					79.9234	79.912	91
789	2.52123	502.421	0.32549	0.320961	0.364098	#REF!	#REF!	#REF!					83	81.845	92.845
790	2.51923	502.82	0.311033	0.327898	0.368627	#REF!	#REF!	#REF!					79.3133	83.614	94
791	2.51723	503.22	0.301961	0.327004	0.356588	#REF!	#REF!	#REF!					77	83.386	90.93
792	2.51523	503.62	0.304367	0.32549	0.34902	#REF!	#REF!	#REF!					77.6135	83	89
793	2.51323	504.021	0.305882	0.32549	0.361039	#REF!	#REF!	#REF!					78	83	92.065
794	2.51122	504.423	0.308284	0.32309	0.368627	#REF!	#REF!	#REF!					78.6125	82.388	94
795	2.50922	504.825	0.309804	0.326369	0.356627	#REF!	#REF!	#REF!					79	83.224	90.94
796	2.50722	505.228	0.307406	0.334573	0.34902	#REF!	#REF!	#REF!					78.3885	85.316	89
797	2.50522	505.632	0.3059	0.340055	0.344227	#REF!	#REF!	#REF!					78.0044	86.714	87.778
798	2.50322	506.036	0.306076	0.342392	0.341176	#REF!	#REF!	#REF!					78.0495	87.31	87
799	2.50122	506.441	0.30633	0.343125	0.345961	#REF!	#REF!	#REF!					78.1142	87.497	88.22
800	2.49922	506.846	0.310919	0.34551	0.34902	#REF!	#REF!	#REF!					79.2843	88.105	89
801	2.49722	507.252	0.313725	0.349267	0.346631	#REF!	#REF!	#REF!					80	89.063	88.391
802	2.49522	507.659	0.321322	0.349678	0.345098	#REF!	#REF!	#REF!					81.9371	89.168	88
803	2.49322	508.066	0.325588	0.346635	0.340329	#REF!	#REF!	#REF!					83.0249	88.392	86.784
804	2.49122	508.475	0.331084	0.347482	0.337255	#REF!	#REF!	#REF!					84.4263	88.608	86
805	2.48921	508.883	0.334723	0.35378	0.334875	#REF!	#REF!	#REF!					85.3543	90.214	85.393
806	2.48721	509.293	0.320634	0.355275	0.333333	#REF!	#REF!	#REF!					81.7616	90.595	85
807	2.48521	509.703	0.311905	0.347016	0.330957	#REF!	#REF!	#REF!					79.5359	88.489	84.394
808	2.48321	510.113	0.312112	0.348067	0.329412	#REF!	#REF!	#REF!					79.5886	88.757	84
809	2.48121	510.525	0.312319	0.359047	0.327039	#REF!	#REF!	#REF!					79.6413	91.557	83.395
810	2.47921	510.937	0.323462	0.365604	0.32549	#REF!	#REF!	#REF!					82.4828	93.229	83
811	2.47721	511.35	0.330405	0.369349	0.320753	#REF!	#REF!	#REF!					84.2533	94.184	81.792
812	2.47521	511.763	0.322146	0.369165	0.317647	#REF!	#REF!	#REF!					82.1473	94.137	81
813	2.47321	512.177	0.317067	0.366012	0.317647	#REF!	#REF!	#REF!					80.8521	93.333	81
814	2.47121	512.592	0.322676	0.367714	0.317647	#REF!	#REF!	#REF!					82.2824	93.767	81
815	2.4692	513.007	0.325823	0.376329	0.322369	#REF!	#REF!	#REF!					83.0849	95.964	82.204
816	2.4672	513.423	0.316091	0.378376	0.32549	#REF!	#REF!	#REF!					80.6033	96.486	83
817	2.4652	513.84	0.310545	0.381286	0.316059	#REF!	#REF!	#REF!					79.1889	97.228	80.595
818	2.4632	514.257	0.311934	0.386855	0.309804	#REF!	#REF!	#REF!					79.5432	98.648	79
819	2.4612	514.675	0.312755	0.385961	0.300388	#REF!	#REF!	#REF!					79.7526	98.42	76.599
820	2.4592	515.094	0.314897	0.386706	0.294231	#REF!	#REF!	#REF!					80.2988	98.61	75.029
821	2.4572	515.514	0.316223	0.390718	0.303357	#REF!	#REF!	#REF!					80.6369	99.633	77.356
822	2.4552	515.934	0.319465	0.394733	0.308886	#REF!	#REF!	#REF!					81.4637	100.657	78.766
823	2.4532	516.355	0.321569	0.401098	0.311043	#REF!	#REF!	#REF!					82	102.28	79.316
824	2.4512	516.776	0.325592	0.406686	0.312463	#REF!	#REF!	#REF!					83.0259	103.705	79.678
825	2.44919	517.198	0.328401	0.406016	0.301698	#REF!	#REF!	#REF!					83.7423	103.534	76.933
826	2.44719	517.621	0.330304	0.404533	0.294729	#REF!	#REF!	#REF!					84.2275	103.156	75.156
827	2.44519	518.045	0.331725	0.406545	0.297361	#REF!	#REF!	#REF!					84.59	103.669	75.827
828	2.44319	518.469	0.323837	0.412518	0.299745	#REF!	#REF!	#REF!					82.5785	105.192	76.435
829	2.44119	518.894	0.318244	0.418557	0.309259	#REF!	#REF!	#REF!					81.1523	106.732	78.861
830	2.43919	519.32	0.326592	0.420604	0.314604	#REF!	#REF!	#REF!					83.2809	107.254	80.224
831	2.43719	519.746	0.332553	0.425098	0.303451	#REF!	#REF!	#REF!					84.8009	108.4	77.38
832	2.43519	520.173	0.319466	0.429435	0.29649	#REF!	#REF!	#REF!					81.4638	109.506	75.605
833	2.43319	520.601	0.310171	0.426227	0.298247	#REF!	#REF!	#REF!					79.0937	108.688	76.053
834	2.43119	521.029	0.323631	0.425855	0.299416	#REF!	#REF!	#REF!					82.5259	108.593	76.351
835	2.42918	521.459	0.333333	0.429773	0.298937	#REF!	#REF!	#REF!					85	109.592	76.229
836	2.42718	521.889	0.326369	0.434624	0.298827	#REF!	#REF!	#REF!					83.224	110.829	76.201
837	2.42518	522.319	0.321569	0.440612	0.299176	#REF!	#REF!	#REF!					82	112.356	76.29
838	2.42318	522.75	0.335475	0.445455	0.298839	#REF!	#REF!	#REF!					85.5461	113.591	76.204
839	2.42118	523.182	0.345098	0.445961	0.292361	#REF!	#REF!	#REF!					88	113.72	74.552
840	2.41918	523.615	0.335842	0.445106	0.288227	#REF!	#REF!	#REF!					85.6398	113.502	73.498
841	2.41718	524.049	0.329412	0.448427	0.282698	#REF!	#REF!	#REF!					84	114.349	72.088
842	2.41518	524.483	0.324792	0.452925	0.279161	#REF!	#REF!	#REF!					82.8219	115.496	71.186
843	2.41318	524.918	0.321569	0.455992	0.282851	#REF!	#REF!	#REF!					82	116.278	72.127
844	2.41118	525.353	0.330794	0.460475	0.284776	#REF!	#REF!	#REF!					84.3524	117.421	72.618
845	2.40918	525.79	0.337255	0.467353	0.287804	#REF!	#REF!	#REF!					86	119.175	73.39
846	2.40717	526.227	0.33265	0.470588	0.290196	#REF!	#REF!	#REF!					84.8258	120	74
847	2.40517	526.665	0.329412	0.472114	0.287882	#REF!	#REF!	#REF!					84	120.389	73.41
848	2.40317	527.103	0.33171	0.472996	0.285965	#REF!	#REF!	#REF!					84.5861	120.614	72.921
849	2.40117	527.542	0.333333	0.471506	0.286675	#REF!	#REF!	#REF!					85	120.234	73.102
850	2.39917	527.982	0.326449	0.470588	0.287286	#REF!	#REF!	#REF!					83.2445	120	73.258
851	2.39717	528.423	0.321569	0.472882	0.289631	#REF!	#REF!	#REF!					82	120.585	73.856
852	2.39517	528.864	0.316987	0.4768	0.291655	#REF!	#REF!	#REF!					80.8316	121.584	74.372
853	2.39317	529.307	0.313725	0.478855	0.298808	#REF!	#REF!	#REF!					80	122.108	76.196
854	2.39117	529.75	0.325161	0.481349	0.303992	#REF!	#REF!	#REF!					82.9161	122.744	77.518
855	2.38917	530.193	0.333333	0.487145	0.290259	#REF!	#REF!	#REF!					85	124.222	74.016
856	2.38716	530.638	0.328767	0.492478	0.2806	#REF!	#REF!	#REF!					83.8355	125.582	71.553
857	2.38516	531.083	0.32549	0.4962	0.284063	#REF!	#REF!	#REF!					83	126.531	72.436
858	2.38316	531.529	0.32777	0.502353	0.286275	#REF!	#REF!	#REF!					83.5813	128.1	73
859	2.38116	531.975	0.329412	0.512475	0.283733	#REF!	#REF!	#REF!					84	130.681	72.352
860	2.37916	532.423	0.32486	0.515259	0.282188	#REF!	#REF!	#REF!					82.8394	131.391	71.958
861	2.37716	532.871	0.321569	0.509176	0.286902	#REF!	#REF!	#REF!					82	129.84	73.16
862	2.37516	533.32	0.32384	0.510267	0.290196	#REF!	#REF!	#REF!					82.5793	130.118	74
863	2.37316	533.77	0.32549	0.515533	0.290196	#REF!	#REF!	#REF!					83	131.461	74
864	2.37116	534.22	0.332294	0.513024	0.290196	#REF!	#REF!	#REF!					84.735	130.821	74
865	2.36916	534.671	0.337255	0.514761	0.290196	#REF!	#REF!	#REF!					86	131.264	74
866	2.36715	535.123	0.337255	0.522694	0.290196	#REF!	#REF!	#REF!					86	133.287	74
867	2.36515	535.576	0.337255	0.524196	0.290196	#REF!	#REF!	#REF!					86	133.67	74
868	2.36315	536.029	0.330474	0.532243	0.290196	#REF!	#REF!	#REF!					84.2709	135.722	74
869	2.36115	536.484	0.32549	0.541016	0.290196	#REF!	#REF!	#REF!					83	137.959	74
870	2.35915	536.939	0.327747	0.542914	0.290196	#REF!	#REF!	#REF!					83.5754	138.443	74
871	2.35715	537.395	0.329412	0.545357	0.287941	#REF!	#REF!	#REF!					84	139.066	73.425
872	2.35515	537.851	0.33617	0.545208	0.286275	#REF!	#REF!	#REF!					85.7233	139.028	73
873	2.35315	538.309	0.341119	0.546161	0.288525	#REF!	#REF!	#REF!					86.9854	139.271	73.574
874	2.35115	538.767	0.336718	0.548471	0.290196	#REF!	#REF!	#REF!					85.863	139.86	74
875	2.34915	539.226	0.333804	0.552059	0.292443	#REF!	#REF!	#REF!					85.1201	140.775	74.573
876	2.34714	539.685	0.334011	0.558063	0.294118	#REF!	#REF!	#REF!					85.1728	142.306	75
877	2.34514	540.146	0.334218	0.560784	0.296361	#REF!	#REF!	#REF!					85.2255	143	75.572
878	2.34314	540.607	0.335418	0.568459	0.298039	#REF!	#REF!	#REF!					85.5317	144.957	76
879	2.34114	541.069	0.335957	0.57431	0.286843	#REF!	#REF!	#REF!					85.6691	146.449	73.145
880	2.33914	541.532	0.333422	0.577588	0.278431	#REF!	#REF!	#REF!					85.0225	147.285	71
881	2.33714	541.996	0.331978	0.580365	0.289608	#REF!	#REF!	#REF!					84.6545	147.993	73.85
882	2.33514	542.46	0.336258	0.57618	0.298039	#REF!	#REF!	#REF!					85.7459	146.926	76
883	2.33314	542.925	0.339052	0.57738	0.306965	#REF!	#REF!	#REF!					86.4583	147.232	78.276
884	2.33114	543.391	0.33547	0.585094	0.313725	#REF!	#REF!	#REF!					85.5448	149.199	80
885	2.32914	543.858	0.333218	0.597145	0.307043	#REF!	#REF!	#REF!					84.9707	152.272	78.296
886	2.32714	544.326	0.33097	0.606149	0.301961	#REF!	#REF!	#REF!					84.3974	154.568	77
887	2.32513	544.794	0.328401	0.604184	0.299737	#REF!	#REF!	#REF!					83.7423	154.067	76.433
888	2.32313	545.263	0.334938	0.599075	0.298039	#REF!	#REF!	#REF!					85.4093	152.764	76
889	2.32113	545.733	0.34062	0.597278	0.302478	#REF!	#REF!	#REF!					86.858	152.306	77.132
890	2.31913	546.204	0.339816	0.60162	0.305882	#REF!	#REF!	#REF!					86.6531	153.413	78
891	2.31713	546.676	0.339144	0.604933	0.303667	#REF!	#REF!	#REF!					86.4817	154.258	77.435
892	2.31513	547.148	0.33914	0.603655	0.301961	#REF!	#REF!	#REF!					86.4808	153.932	77
893	2.31313	547.622	0.338541	0.601996	0.310812	#REF!	#REF!	#REF!					86.328	153.509	79.257
894	2.31113	548.096	0.330422	0.603251	0.317647	#REF!	#REF!	#REF!					84.2575	153.829	81
895	2.30913	548.571	0.324124	0.611176	0.319855	#REF!	#REF!	#REF!					82.6515	155.85	81.563
896	2.30713	549.047	0.328977	0.618125	0.321569	#REF!	#REF!	#REF!					83.8891	157.622	82
897	2.30512	549.523	0.332553	0.619608	0.317161	#REF!	#REF!	#REF!					84.8009	158	80.876
898	2.30312	550.001	0.334229	0.617024	0.313725	#REF!	#REF!	#REF!					85.2284	157.341	80
899	2.30112	550.479	0.336353	0.617396	0.318125	#REF!	#REF!	#REF!					85.7701	157.436	81.122
900	2.29912	550.958	0.332642	0.626075	0.321569	#REF!	#REF!	#REF!					84.8238	159.649	82
901	2.29712	551.438	0.329412	0.629176	0.323765	#REF!	#REF!	#REF!					84	160.44	82.56
902	2.29512	551.919	0.33719	0.62302	0.325573	#REF!	#REF!	#REF!					85.9834	158.87	83.021
903	2.29312	552.4	0.343513	0.621663	0.330075	#REF!	#REF!	#REF!					87.5959	158.524	84.169
904	2.29112	552.883	0.335724	0.621106	0.333569	#REF!	#REF!	#REF!					85.6097	158.382	85.06
905	2.28912	553.366	0.329412	0.617639	0.338043	#REF!	#REF!	#REF!					84	157.498	86.201
906	2.28712	553.85	0.325575	0.62091	0.3416	#REF!	#REF!	#REF!					83.0215	158.332	87.108
907	2.28511	554.335	0.322327	0.623702	0.334851	#REF!	#REF!	#REF!					82.1933	159.044	85.387
908	2.28311	554.821	0.328671	0.625098	0.329412	#REF!	#REF!	#REF!					83.8111	159.4	84
909	2.28111	555.308	0.333678	0.631894	0.33338	#REF!	#REF!	#REF!					85.0878	161.133	85.012
910	2.27911	555.795	0.328996	0.633922	0.336447	#REF!	#REF!	#REF!					83.8941	161.65	85.794
911	2.27711	556.284	0.32549	0.633624	0.335004	#REF!	#REF!	#REF!					83	161.574	85.426
912	2.27511	556.773	0.332018	0.635843	0.334408	#REF!	#REF!	#REF!					84.6647	162.14	85.274
913	2.27311	557.263	0.337255	0.633082	0.3408	#REF!	#REF!	#REF!					86	161.436	86.904
914	2.27111	557.754	0.324221	0.625839	0.345937	#REF!	#REF!	#REF!					82.6764	159.589	88.214
915	2.26911	558.246	0.313725	0.622957	0.347102	#REF!	#REF!	#REF!					80	158.854	88.511
916	2.26711	558.739	0.315894	0.627867	0.347639	#REF!	#REF!	#REF!					80.553	160.106	88.648
917	2.2651	559.232	0.317647	0.628925	0.351059	#REF!	#REF!	#REF!					81	160.376	89.52
918	2.2631	559.727	0.317647	0.626651	0.353718	#REF!	#REF!	#REF!					81	159.796	90.198
919	2.2611	560.222	0.317647	0.627565	0.360933	#REF!	#REF!	#REF!					81	160.029	92.038
920	2.2591	560.718	0.315486	0.633145	0.366863	#REF!	#REF!	#REF!					80.449	161.452	93.55
921	2.2571	561.215	0.313725	0.637176	0.362451	#REF!	#REF!	#REF!					80	162.48	92.425
922	2.2551	561.713	0.307255	0.637259	0.358827	#REF!	#REF!	#REF!					78.3499	162.501	91.501
923	2.2531	562.212	0.301961	0.638392	0.365298	#REF!	#REF!	#REF!					77	162.79	93.151
924	2.2511	562.712	0.312726	0.640769	0.370776	#REF!	#REF!	#REF!					79.7452	163.396	94.548
925	2.2491	563.212	0.321569	0.645706	0.375784	#REF!	#REF!	#REF!					82	164.655	95.825
926	2.2471	563.714	0.31727	0.652075	0.379635	#REF!	#REF!	#REF!					80.9039	166.279	96.807
927	2.2451	564.216	0.313725	0.652235	0.380482	#REF!	#REF!	#REF!					80	166.32	97.023
928	2.24309	564.72	0.302998	0.646933	0.381529	#REF!	#REF!	#REF!					77.2645	164.968	97.29
929	2.24109	565.224	0.294118	0.648012	0.380996	#REF!	#REF!	#REF!					75	165.243	97.154
930	2.23909	565.729	0.300543	0.653122	0.380392	#REF!	#REF!	#REF!					76.6384	166.546	97
931	2.23709	566.235	0.305882	0.657976	0.389886	#REF!	#REF!	#REF!					78	167.784	99.421
932	2.23509	566.742	0.303745	0.658588	0.397984	#REF!	#REF!	#REF!					77.4549	167.94	101.486
933	2.23309	567.25	0.301961	0.659133	0.393259	#REF!	#REF!	#REF!					77	168.079	100.281
934	2.23109	567.759	0.299827	0.66538	0.389051	#REF!	#REF!	#REF!					76.4558	169.672	99.208
935	2.22909	568.268	0.298039	0.662749	0.399396	#REF!	#REF!	#REF!					76	169.001	101.846
936	2.22709	568.779	0.295909	0.655443	0.408635	#REF!	#REF!	#REF!					75.4568	167.138	104.202
937	2.22509	569.29	0.294118	0.65131	0.413659	#REF!	#REF!	#REF!					75	166.084	105.483
938	2.22308	569.803	0.296244	0.653051	0.417871	#REF!	#REF!	#REF!					75.5422	166.528	106.557
939	2.22108	570.316	0.298039	0.665776	0.415945	#REF!	#REF!	#REF!					76	169.773	106.066
940	2.21908	570.83	0.289549	0.678137	0.414471	#REF!	#REF!	#REF!					73.835	172.925	105.69
941	2.21708	571.345	0.282353	0.679871	0.423592	#REF!	#REF!	#REF!					72	173.367	108.016
942	2.21508	571.862	0.288709	0.684655	0.431216	#REF!	#REF!	#REF!					73.6208	174.587	109.96
943	2.21308	572.379	0.294118	0.68378	0.431373	#REF!	#REF!	#REF!					75	174.364	110
944	2.21108	572.897	0.285658	0.66802	0.431373	#REF!	#REF!	#REF!					72.8428	170.345	110
945	2.20908	573.416	0.278431	0.665996	0.429259	#REF!	#REF!	#REF!					71	169.829	109.461
946	2.20708	573.935	0.27632	0.6756	0.427451	#REF!	#REF!	#REF!					70.4617	172.278	109
947	2.20508	574.456	0.27451	0.676749	0.446431	#REF!	#REF!	#REF!					70	172.571	113.84
948	2.20307	574.978	0.280831	0.679525	0.462745	#REF!	#REF!	#REF!					71.612	173.279	118
949	2.20107	575.501	0.286315	0.685694	0.460639	#REF!	#REF!	#REF!					73.0102	174.852	117.463
950	2.19907	576.024	0.282519	0.686365	0.458824	#REF!	#REF!	#REF!					72.0424	175.023	117
951	2.19707	576.549	0.279666	0.685592	0.463027	#REF!	#REF!	#REF!					71.3148	174.826	118.072
952	2.19507	577.075	0.285544	0.684522	0.466667	#REF!	#REF!	#REF!					72.8136	174.553	119
953	2.19307	577.601	0.290196	0.681792	0.468765	#REF!	#REF!	#REF!					74	173.857	119.535
954	2.19107	578.129	0.293792	0.685741	0.470588	#REF!	#REF!	#REF!					74.917	174.864	120
955	2.18907	578.657	0.296719	0.690196	0.481059	#REF!	#REF!	#REF!					75.6633	176	122.67
956	2.18707	579.186	0.292328	0.696471	0.490196	#REF!	#REF!	#REF!					74.5437	177.6	125
957	2.18507	579.717	0.288462	0.713149	0.490196	#REF!	#REF!	#REF!					73.5578	181.853	125
958	2.18306	580.248	0.280915	0.719933	0.490196	#REF!	#REF!	#REF!					71.6333	183.583	125
959	2.18106	580.781	0.274883	0.712259	0.492282	#REF!	#REF!	#REF!					70.0952	181.626	125.532
960	2.17906	581.314	0.282797	0.707792	0.494118	#REF!	#REF!	#REF!					72.1133	180.487	126
961	2.17706	581.848	0.288996	0.709729	0.500365	#REF!	#REF!	#REF!					73.694	180.981	127.593
962	2.17506	582.383	0.285278	0.712443	0.505882	#REF!	#REF!	#REF!					72.7458	181.673	129
963	2.17306	582.92	0.282353	0.715788	0.514196	#REF!	#REF!	#REF!					72	182.526	131.12
964	2.17106	583.457	0.279492	0.71702	0.521569	#REF!	#REF!	#REF!					71.2704	182.84	133
965	2.16906	583.995	0.277364	0.7204	0.523643	#REF!	#REF!	#REF!					70.7277	183.702	133.529
966	2.16706	584.534	0.283649	0.722894	0.52549	#REF!	#REF!	#REF!					72.3305	184.338	134
967	2.16506	585.075	0.289714	0.720733	0.52549	#REF!	#REF!	#REF!					73.877	183.787	134
968	2.16306	585.616	0.292518	0.725004	0.52549	#REF!	#REF!	#REF!					74.5922	184.876	134
969	2.16105	586.158	0.294703	0.733545	0.533757	#REF!	#REF!	#REF!					75.1493	187.054	136.108
970	2.15905	586.701	0.291362	0.740043	0.541176	#REF!	#REF!	#REF!					74.2972	188.711	138
971	2.15705	587.246	0.287882	0.736839	0.55562	#REF!	#REF!	#REF!					73.41	187.894	141.683
972	2.15505	587.791	0.292861	0.734384	0.568627	#REF!	#REF!	#REF!					74.6796	187.268	145
973	2.15305	588.337	0.297758	0.739208	0.574804	#REF!	#REF!	#REF!					75.9283	188.498	146.575
974	2.15105	588.884	0.292546	0.74351	0.580392	#REF!	#REF!	#REF!					74.5993	189.595	148
975	2.14905	589.433	0.28713	0.752353	0.592725	#REF!	#REF!	#REF!					73.2182	191.85	151.145
976	2.14705	589.982	0.292985	0.761055	0.603922	#REF!	#REF!	#REF!					74.7113	194.069	154
977	2.14505	590.532	0.298998	0.767561	0.605973	#REF!	#REF!	#REF!					76.2445	195.728	154.523
978	2.14305	591.084	0.29547	0.769718	0.607843	#REF!	#REF!	#REF!					75.3448	196.278	155
979	2.14104	591.636	0.291758	0.767969	0.616035	#REF!	#REF!	#REF!					74.3982	195.832	157.089
980	2.13904	592.19	0.294304	0.766082	0.623529	#REF!	#REF!	#REF!					75.0475	195.351	159
981	2.13704	592.744	0.296415	0.76651	0.621486	#REF!	#REF!	#REF!					75.5857	195.46	158.479
982	2.13504	593.3	0.296817	0.776498	0.619608	#REF!	#REF!	#REF!					75.6884	198.007	158
983	2.13304	593.856	0.297672	0.786231	0.637969	#REF!	#REF!	#REF!					75.9063	200.489	162.682
984	2.13104	594.414	0.2956	0.788235	0.655176	#REF!	#REF!	#REF!					75.3779	201	167.07
985	2.12904	594.973	0.293796	0.796161	0.667529	#REF!	#REF!	#REF!					74.918	203.021	170.22
986	2.12704	595.532	0.298012	0.803208	0.678431	#REF!	#REF!	#REF!					75.9931	204.818	173
987	2.12504	596.093	0.301961	0.801408	0.684702	#REF!	#REF!	#REF!					77	204.359	174.599
988	2.12304	596.655	0.306022	0.804063	0.690624	#REF!	#REF!	#REF!					78.0356	205.036	176.109
989	2.12103	597.218	0.309804	0.802298	0.694376	#REF!	#REF!	#REF!					79	204.586	177.066
990	2.11903	597.782	0.311831	0.799345	0.698459	#REF!	#REF!	#REF!					79.5168	203.833	178.107
991	2.11703	598.347	0.313725	0.809529	0.710345	#REF!	#REF!	#REF!					80	206.43	181.138
992	2.11503	598.913	0.305634	0.811239	0.720757	#REF!	#REF!	#REF!					77.9366	206.866	183.793
993	2.11303	599.48	0.298039	0.801376	0.722835	#REF!	#REF!	#REF!					76	204.351	184.323
994	2.11103	600.048	0.302078	0.801031	0.724396	#REF!	#REF!	#REF!					77.0298	204.263	184.721
995	2.10903	600.617	0.305882	0.807373	0.735137	#REF!	#REF!	#REF!					78	205.88	187.46
996	2.10703	601.188	0.307898	0.80962	0.745435	#REF!	#REF!	#REF!					78.5139	206.453	190.086
997	2.10503	601.759	0.309804	0.807808	0.745176	#REF!	#REF!	#REF!					79	205.991	190.02
998	2.10303	602.332	0.305781	0.806459	0.744627	#REF!	#REF!	#REF!					77.9741	205.647	189.88
999	2.10102	602.906	0.301961	0.805604	0.748341	#REF!	#REF!	#REF!					77	205.429	190.827
1000	2.09902	603.48	0.301961	0.800675	0.752133	#REF!	#REF!	#REF!					77	204.172	191.794
1001	2.09702	604.056	0.301961	0.793792	0.762463	#REF!	#REF!	#REF!					77	202.417	194.428
1002	2.09502	604.633	0.303965	0.796784	0.771933	#REF!	#REF!	#REF!					77.511	203.18	196.843
1003	2.09302	605.211	0.305882	0.796145	0.765161	#REF!	#REF!	#REF!					78	203.017	195.116
1004	2.09102	605.79	0.313882	0.784196	0.758827	#REF!	#REF!	#REF!					80.04	199.97	193.501
1005	2.08902	606.371	0.321569	0.781286	0.767196	#REF!	#REF!	#REF!					82	199.228	195.635
1006	2.08702	606.952	0.317576	0.783933	0.774949	#REF!	#REF!	#REF!					80.9819	199.903	197.612
1007	2.08502	607.534	0.313725	0.781455	0.78189	#REF!	#REF!	#REF!					80	199.271	199.382
1008	2.08302	608.118	0.305756	0.772886	0.789051	#REF!	#REF!	#REF!					77.9678	197.086	201.208
1009	2.08102	608.703	0.298039	0.767957	0.785369	#REF!	#REF!	#REF!					76	195.829	200.269
1010	2.07901	609.289	0.307982	0.770859	0.780451	#REF!	#REF!	#REF!					78.5354	196.569	199.015
1011	2.07701	609.876	0.317647	0.769816	0.796749	#REF!	#REF!	#REF!					81	196.303	203.171
1012	2.07501	610.464	0.311693	0.762463	0.813157	#REF!	#REF!	#REF!					79.4817	194.428	207.355
1013	2.07301	611.053	0.305882	0.756467	0.807898	#REF!	#REF!	#REF!					78	192.899	206.014
1014	2.07101	611.643	0.303902	0.756933	0.803114	#REF!	#REF!	#REF!					77.4949	193.018	204.794
1015	2.06901	612.235	0.301961	0.756847	0.811247	#REF!	#REF!	#REF!					77	192.996	206.868
1016	2.06701	612.827	0.299984	0.749714	0.820275	#REF!	#REF!	#REF!					76.4958	191.177	209.17
1017	2.06501	613.421	0.298039	0.745467	0.816733	#REF!	#REF!	#REF!					76	190.094	208.267
1018	2.06301	614.016	0.300013	0.74271	0.812196	#REF!	#REF!	#REF!					76.5032	189.391	207.11
1019	2.06101	614.612	0.301961	0.740275	0.824918	#REF!	#REF!	#REF!					77	188.77	210.354
1020	2.059	615.21	0.294083	0.741608	0.838353	#REF!	#REF!	#REF!					74.9912	189.11	213.78
1021	2.057	615.808	0.286275	0.741345	0.843824	#REF!	#REF!	#REF!					73	189.043	215.175
1022	2.055	616.408	0.290205	0.737365	0.848494	#REF!	#REF!	#REF!					74.0024	188.028	216.366
1023	2.053	617.009	0.294118	0.729333	0.839776	#REF!	#REF!	#REF!					75	185.98	214.143
1024	2.051	617.611	0.284309	0.723431	0.831467	#REF!	#REF!	#REF!					72.4988	184.475	212.024
1025	2.049	618.214	0.274613	0.715667	0.843133	#REF!	#REF!	#REF!					70.0264	182.495	214.999
1026	2.047	618.818	0.276855	0.713576	0.854902	#REF!	#REF!	#REF!					70.5981	181.962	218
1027	2.045	619.423	0.279207	0.713255	0.854902	#REF!	#REF!	#REF!					71.1977	181.88	218
1028	2.043	620.03	0.28111	0.705894	0.854902	#REF!	#REF!	#REF!					71.6831	180.003	218
1029	2.041	620.638	0.282818	0.704561	0.852949	#REF!	#REF!	#REF!					72.1186	179.663	217.502
1030	2.03899	621.247	0.275403	0.704459	0.85098	#REF!	#REF!	#REF!					70.2278	179.637	217
1031	2.03699	621.857	0.26801	0.696737	0.856824	#REF!	#REF!	#REF!					68.3426	177.668	218.49
1032	2.03499	622.469	0.270956	0.694451	0.862745	#REF!	#REF!	#REF!					69.0937	177.085	220
1033	2.03299	623.082	0.273631	0.699984	0.874412	#REF!	#REF!	#REF!					69.776	178.496	222.975
1034	2.03099	623.695	0.276927	0.70002	0.886275	#REF!	#REF!	#REF!					70.6163	178.505	226
1035	2.02899	624.31	0.280183	0.694157	0.895976	#REF!	#REF!	#REF!					71.4466	177.01	228.474
1036	2.02699	624.927	0.270106	0.689651	0.905882	#REF!	#REF!	#REF!					68.877	175.861	231
1037	2.02499	625.544	0.260115	0.690937	0.900071	#REF!	#REF!	#REF!					66.3294	176.189	229.518
1038	2.02299	626.163	0.264647	0.690867	0.894118	#REF!	#REF!	#REF!					67.4849	176.171	228
1039	2.02099	626.783	0.26909	0.690984	0.905718	#REF!	#REF!	#REF!					68.6179	176.201	230.958
1040	2.01898	627.404	0.274344	0.691231	0.917647	#REF!	#REF!	#REF!					69.9578	176.264	234
1041	2.01698	628.027	0.279453	0.687502	0.915718	#REF!	#REF!	#REF!					71.2606	175.313	233.508
1042	2.01498	628.65	0.271032	0.681847	0.913725	#REF!	#REF!	#REF!					69.1131	173.871	233
1043	2.01298	629.275	0.262745	0.670349	0.921427	#REF!	#REF!	#REF!					67	170.939	234.964
1044	2.01098	629.901	0.264722	0.664478	0.929412	#REF!	#REF!	#REF!					67.5041	169.442	237
1045	2.00898	630.529	0.266982	0.674353	0.946706	#REF!	#REF!	#REF!					68.0805	171.96	241.41
1046	2.00698	631.157	0.265269	0.678424	0.964706	#REF!	#REF!	#REF!					67.6437	172.998	246
1047	2.00498	631.787	0.263474	0.671824	0.966624	#REF!	#REF!	#REF!					67.1859	171.315	246.489
1048	2.00298	632.418	0.264682	0.67138	0.968627	#REF!	#REF!	#REF!					67.494	171.202	247
1049	2.00098	633.051	0.265524	0.673702	0.960973	#REF!	#REF!	#REF!					67.7086	171.794	245.048
1050	1.99898	633.684	0.266006	0.671141	0.952941	#REF!	#REF!	#REF!					67.8315	171.141	243
1051	1.99697	634.319	0.26704	0.661647	0.968224	#REF!	#REF!	#REF!					68.0952	168.72	246.897
1052	1.99497	634.956	0.265302	0.652992	0.984314	#REF!	#REF!	#REF!					67.652	166.513	251
1053	1.99297	635.593	0.262728	0.6504	0.978596	#REF!	#REF!	#REF!					66.9956	165.852	249.542
1054	1.99097	636.232	0.265908	0.654529	0.972549	#REF!	#REF!	#REF!					67.8066	166.905	248
1055	1.98897	636.872	0.269819	0.665443	0.974451	#REF!	#REF!	#REF!					68.8038	169.688	248.485
1056	1.98697	637.513	0.268022	0.667847	0.976471	#REF!	#REF!	#REF!					68.3455	170.301	249
1057	1.98497	638.156	0.266104	0.657863	0.987863	#REF!	#REF!	#REF!					67.8565	167.755	251.905
1058	1.98297	638.8	0.267438	0.650659	1	#REF!	#REF!	#REF!					68.1966	165.918	255
1059	1.98097	639.445	0.269164	0.655424	1	#REF!	#REF!	#REF!					68.6369	167.133	255
1060	1.97897	640.092	0.271593	0.657537	1	#REF!	#REF!	#REF!					69.2561	167.672	255
1061	1.97696	640.74	0.274062	0.643035	1	#REF!	#REF!	#REF!					69.8858	163.974	255
1062	1.97496	641.389	0.270705	0.631569	1	#REF!	#REF!	#REF!					69.0297	161.05	255
1063	1.97296	642.039	0.266667	0.632784	1	#REF!	#REF!	#REF!					68	161.36	255
1064	1.97096	642.691	0.264782	0.629561	1	#REF!	#REF!	#REF!					67.5193	160.538	255
1065	1.96896	643.344	0.262745	0.625459	1	#REF!	#REF!	#REF!					67	159.492	255
1066	1.96696	643.999	0.268389	0.6274	1	#REF!	#REF!	#REF!					68.4392	159.987	255
1067	1.96496	644.655	0.27451	0.627306	1	#REF!	#REF!	#REF!					70	159.963	255
1068	1.96296	645.312	0.278265	0.632843	1	#REF!	#REF!	#REF!					70.9575	161.375	255
1069	1.96096	645.97	0.282353	0.633737	1	#REF!	#REF!	#REF!					72	161.603	255
1070	1.95896	646.63	0.271111	0.624361	1	#REF!	#REF!	#REF!					69.1332	159.212	255
1071	1.95695	647.291	0.258824	0.614773	1	#REF!	#REF!	#REF!					66	156.767	255
1072	1.95495	647.954	0.268173	0.611259	1	#REF!	#REF!	#REF!					68.3841	155.871	255
1073	1.95295	648.618	0.278431	0.618157	1	#REF!	#REF!	#REF!					71	157.63	255
1074	1.95095	649.283	0.272833	0.61898	1	#REF!	#REF!	#REF!					69.5725	157.84	255
1075	1.94895	649.949	0.266667	0.611478	1	#REF!	#REF!	#REF!					68	155.927	255
1076	1.94695	650.617	0.266667	0.607365	1	#REF!	#REF!	#REF!					68	154.878	255
1077	1.94495	651.287	0.266667	0.608078	1	#REF!	#REF!	#REF!					68	155.06	255
1078	1.94295	651.958	0.268525	0.60751	1	#REF!	#REF!	#REF!					68.4739	154.915	255
1079	1.94095	652.63	0.270588	0.604012	1	#REF!	#REF!	#REF!					69	154.023	255
1080	1.93895	653.303	0.268734	0.608094	1	#REF!	#REF!	#REF!					68.5271	155.064	255
1081	1.93694	653.978	0.266667	0.611647	1	#REF!	#REF!	#REF!					68	155.97	255
1082	1.93494	654.654	0.27592	0.606753	1	#REF!	#REF!	#REF!					70.3597	154.722	255
1083	1.93294	655.332	0.286275	0.60449	1	#REF!	#REF!	#REF!					73	154.145	255
1084	1.93094	656.011	0.282581	0.595063	1	#REF!	#REF!	#REF!					72.0581	151.741	255
1085	1.92894	656.692	0.278431	0.578788	1	#REF!	#REF!	#REF!					71	147.591	255
1086	1.92694	657.374	0.274745	0.568867	1	#REF!	#REF!	#REF!					70.06	145.061	255
1087	1.92494	658.057	0.270588	0.564718	1	#REF!	#REF!	#REF!					69	144.003	255
1088	1.92294	658.742	0.268749	0.567169	1	#REF!	#REF!	#REF!					68.531	144.628	255
1089	1.92094	659.428	0.266667	0.571353	1	#REF!	#REF!	#REF!					68	145.695	255
1090	1.91894	660.116	0.274008	0.569616	1	#REF!	#REF!	#REF!					69.8721	145.252	255
1091	1.91694	660.805	0.282353	0.564353	1	#REF!	#REF!	#REF!					72	143.91	255
1092	1.91493	661.495	0.284185	0.560337	1	#REF!	#REF!	#REF!					72.4671	142.886	255
1093	1.91293	662.187	0.286275	0.555722	1	#REF!	#REF!	#REF!					73	141.709	255
1094	1.91093	662.88	0.284447	0.551114	1	#REF!	#REF!	#REF!					72.5339	140.534	255
1095	1.90893	663.575	0.282353	0.550553	1	#REF!	#REF!	#REF!					72	140.391	255
1096	1.90693	664.272	0.284177	0.552024	1	#REF!	#REF!	#REF!					72.4651	140.766	255
1097	1.90493	664.969	0.286275	0.552294	1	#REF!	#REF!	#REF!					73	140.835	255
1098	1.90293	665.669	0.286275	0.551498	1	#REF!	#REF!	#REF!					73	140.632	255
1099	1.90093	666.369	0.286275	0.547914	1	#REF!	#REF!	#REF!					73	139.718	255
1100	1.89893	667.071	0.286275	0.545718	1	#REF!	#REF!	#REF!					73	139.158	255
1101	1.89693	667.775	0.286085	0.539937	1	#REF!	#REF!	#REF!					72.9517	137.684	255
1102	1.89492	668.48	0.284347	0.524271	1	#REF!	#REF!	#REF!					72.5086	133.689	255
1103	1.89292	669.187	0.282893	0.515843	1	#REF!	#REF!	#REF!					72.1376	131.54	255
1104	1.89092	669.895	0.284564	0.521733	1	#REF!	#REF!	#REF!					72.5638	133.042	255
1105	1.88892	670.605	0.286275	0.528996	1	#REF!	#REF!	#REF!					73	134.894	255
1106	1.88692	671.316	0.287012	0.529569	1	#REF!	#REF!	#REF!					73.188	135.04	255
1107	1.88492	672.028	0.287463	0.520082	1	#REF!	#REF!	#REF!					73.3031	132.621	255
1108	1.88292	672.743	0.291741	0.513588	1	#REF!	#REF!	#REF!					74.3939	130.965	255
1109	1.88092	673.458	0.297678	0.513239	1	#REF!	#REF!	#REF!					75.9078	130.876	255
1110	1.87892	674.176	0.291765	0.513047	1	#REF!	#REF!	#REF!					74.4002	130.827	255
1111	1.87692	674.894	0.284081	0.507471	1	#REF!	#REF!	#REF!					72.4407	129.405	255
1112	1.87491	675.615	0.288412	0.499106	1	#REF!	#REF!	#REF!					73.545	127.272	255
1113	1.87291	676.336	0.294106	0.494996	1	#REF!	#REF!	#REF!					74.9971	126.224	255
1114	1.87091	677.06	0.290059	0.492345	1	#REF!	#REF!	#REF!					73.9651	125.548	255
1115	1.86891	677.785	0.284764	0.489506	1	#REF!	#REF!	#REF!					72.6149	124.824	255
1116	1.86691	678.511	0.284345	0.479157	1	#REF!	#REF!	#REF!					72.5079	122.185	255
1117	1.86491	679.239	0.28407	0.472486	1	#REF!	#REF!	#REF!					72.4378	120.484	255
1118	1.86291	679.969	0.284872	0.47478	1	#REF!	#REF!	#REF!					72.6424	121.069	255
1119	1.86091	680.7	0.286125	0.472184	1	#REF!	#REF!	#REF!					72.9619	120.407	255
1120	1.85891	681.433	0.292552	0.468102	1	#REF!	#REF!	#REF!					74.6008	119.366	255
1121	1.85691	682.167	0.299492	0.466667	1	#REF!	#REF!	#REF!					76.3704	119	255
1122	1.8549	682.903	0.29588	0.465992	1	#REF!	#REF!	#REF!					75.4495	118.828	255
1123	1.8529	683.64	0.291781	0.459769	1	#REF!	#REF!	#REF!					74.4041	117.241	255
1124	1.8509	684.379	0.294549	0.449937	1	#REF!	#REF!	#REF!					75.1101	114.734	255
1125	1.8489	685.12	0.298039	0.445659	1	#REF!	#REF!	#REF!					76	113.643	255
1126	1.8469	685.862	0.298701	0.446129	1	#REF!	#REF!	#REF!					76.1688	113.763	255
1127	1.8449	686.606	0.300026	0.445294	1	#REF!	#REF!	#REF!					76.5066	113.55	255
1128	1.8429	687.352	0.30118	0.440718	1	#REF!	#REF!	#REF!					76.8009	112.383	255
1129	1.8409	688.099	0.301961	0.434714	1	#REF!	#REF!	#REF!					77	110.852	255
1130	1.8389	688.847	0.297284	0.431357	1	#REF!	#REF!	#REF!					75.8075	109.996	255
1131	1.8369	689.598	0.291844	0.432149	1	#REF!	#REF!	#REF!					74.4202	110.198	255
1132	1.8349	690.35	0.297129	0.426871	1	#REF!	#REF!	#REF!					75.7678	108.852	255
1133	1.83289	691.103	0.303063	0.418078	1	#REF!	#REF!	#REF!					77.2811	106.61	255
1134	1.83089	691.859	0.303808	0.414475	1	#REF!	#REF!	#REF!					77.471	105.691	255
1135	1.82889	692.616	0.305193	0.412957	1	#REF!	#REF!	#REF!					77.8243	105.304	255
1136	1.82689	693.374	0.300803	0.414118	1	#REF!	#REF!	#REF!					76.7047	105.6	255
1137	1.82489	694.135	0.294669	0.415686	1	#REF!	#REF!	#REF!					75.1406	106	255
1138	1.82289	694.897	0.304609	0.410455	1	#REF!	#REF!	#REF!					77.6754	104.666	255
1139	1.82089	695.66	0.317647	0.404278	1	#REF!	#REF!	#REF!					81	103.091	255
1140	1.81889	696.426	0.310688	0.404949	1	#REF!	#REF!	#REF!					79.2255	103.262	255
1141	1.81689	697.193	0.301961	0.401678	1	#REF!	#REF!	#REF!					77	102.428	255
1142	1.81489	697.961	0.308904	0.397933	1	#REF!	#REF!	#REF!					78.7706	101.473	255
1143	1.81288	698.732	0.317647	0.399149	1	#REF!	#REF!	#REF!					81	101.783	255
1144	1.81088	699.504	0.310719	0.397902	1	#REF!	#REF!	#REF!					79.2333	101.465	255
1145	1.80888	700.277	0.301961	0.396078	1	#REF!	#REF!	#REF!					77	101	255
1146	1.80688	701.053	0.303689	0.394412	1	#REF!	#REF!	#REF!					77.4407	100.575	255
1147	1.80488	701.83	0.305882	0.387039	1	#REF!	#REF!	#REF!					78	98.695	255
1148	1.80288	702.609	0.300709	0.378776	1	#REF!	#REF!	#REF!					76.6808	96.588	255
1149	1.80088	703.39	0.294118	0.376769	1	#REF!	#REF!	#REF!					75	96.076	255
1150	1.79888	704.172	0.295838	0.382016	1	#REF!	#REF!	#REF!					75.4388	97.414	255
1151	1.79688	704.956	0.298039	0.389996	1	#REF!	#REF!	#REF!					76	99.449	255
1152	1.79488	705.742	0.299756	0.386569	1	#REF!	#REF!	#REF!					76.4378	98.575	255
1153	1.79287	706.53	0.301961	0.376894	1	#REF!	#REF!	#REF!					77	96.108	255
1154	1.79087	707.319	0.312238	0.376604	1	#REF!	#REF!	#REF!					79.6208	96.034	255
1155	1.78887	708.111	0.32549	0.382196	1	#REF!	#REF!	#REF!					83	97.46	255
1156	1.78687	708.903	0.316945	0.380075	1	#REF!	#REF!	#REF!					80.8209	96.919	255
1157	1.78487	709.698	0.305882	0.373451	1	#REF!	#REF!	#REF!					78	95.23	255
1158	1.78287	710.495	0.307587	0.368824	1	#REF!	#REF!	#REF!					78.4348	94.05	255
1159	1.78087	711.293	0.309804	0.368118	1	#REF!	#REF!	#REF!					79	93.87	255
1160	1.77887	712.093	0.314908	0.369624	1	#REF!	#REF!	#REF!					80.3016	94.254	255
1161	1.77687	712.895	0.321569	0.365808	1	#REF!	#REF!	#REF!					82	93.281	255
1162	1.77487	713.699	0.318173	0.362176	1	#REF!	#REF!	#REF!					81.1342	92.355	255
1163	1.77286	714.504	0.313725	0.360576	1	#REF!	#REF!	#REF!					80	91.947	255
1164	1.77086	715.312	0.315419	0.355059	1	#REF!	#REF!	#REF!					80.4319	90.54	255
1165	1.76886	716.121	0.317647	0.35191	1	#REF!	#REF!	#REF!					81	89.737	255
1166	1.76686	716.932	0.324407	0.35669	1	#REF!	#REF!	#REF!					82.7238	90.956	255
1167	1.76486	717.745	0.333333	0.360886	1	#REF!	#REF!	#REF!					85	92.026	255
1168	1.76286	718.559	0.326589	0.355725	1	#REF!	#REF!	#REF!					83.2801	90.71	255
1169	1.76086	719.376	0.317647	0.347247	1	#REF!	#REF!	#REF!					81	88.548	255
1170	1.75886	720.194	0.319329	0.344702	1	#REF!	#REF!	#REF!					81.429	87.899	255
1171	1.75686	721.015	0.321569	0.343796	0.992271	#REF!	#REF!	#REF!					82	87.668	253.029
1172	1.75486	721.837	0.316533	0.343753	0.981196	#REF!	#REF!	#REF!					80.716	87.657	250.205
1173	1.75286	722.661	0.309804	0.344051	0.974557	#REF!	#REF!	#REF!					79	87.733	248.512
1174	1.75085	723.487	0.321527	0.34482	0.966306	#REF!	#REF!	#REF!					81.9893	87.929	246.408
1175	1.74885	724.314	0.337255	0.348216	0.952541	#REF!	#REF!	#REF!					86	88.795	242.898
1176	1.74685	725.144	0.333913	0.346992	0.934165	#REF!	#REF!	#REF!					85.1479	88.483	238.212
1177	1.74485	725.976	0.329038	0.343525	0.930447	#REF!	#REF!	#REF!					83.9048	87.599	237.264
1178	1.74285	726.809	0.322384	0.340082	0.925557	#REF!	#REF!	#REF!					82.2078	86.721	236.017
1179	1.74085	727.645	0.314288	0.337639	0.925557	#REF!	#REF!	#REF!					80.1435	86.098	236.017
1180	1.73885	728.482	0.312505	0.339725	0.925596	#REF!	#REF!	#REF!					79.6889	86.63	236.027
1181	1.73685	729.321	0.309804	0.342188	0.924976	#REF!	#REF!	#REF!					79	87.258	235.869
1182	1.73485	730.162	0.317851	0.339086	0.924875	#REF!	#REF!	#REF!					81.0519	86.467	235.843
1183	1.73285	731.006	0.328717	0.335808	0.921	#REF!	#REF!	#REF!					83.8228	85.631	234.855
1184	1.73084	731.851	0.327295	0.336024	0.915957	#REF!	#REF!	#REF!					83.4602	85.686	233.569
1185	1.72884	732.698	0.32549	0.331871	0.907659	#REF!	#REF!	#REF!					83	84.627	231.453
1186	1.72684	733.547	0.324262	0.32951	0.895275	#REF!	#REF!	#REF!					82.6867	84.025	228.295
1187	1.72484	734.398	0.322677	0.331196	0.881886	#REF!	#REF!	#REF!					82.2826	84.455	224.881
1188	1.72284	735.251	0.321762	0.33502	0.863145	#REF!	#REF!	#REF!					82.0493	85.43	220.102
1189	1.72084	736.106	0.320254	0.333906	0.861098	#REF!	#REF!	#REF!					81.6647	85.146	219.58
1190	1.71884	736.963	0.318506	0.329259	0.858824	#REF!	#REF!	#REF!					81.2191	83.961	219
1191	1.71684	737.821	0.316125	0.329165	0.853898	#REF!	#REF!	#REF!					80.612	83.937	217.744
1192	1.71484	738.682	0.323544	0.330565	0.847059	#REF!	#REF!	#REF!					82.5036	84.294	216
1193	1.71284	739.545	0.333798	0.334094	0.847059	#REF!	#REF!	#REF!					85.1186	85.194	216
1194	1.71083	740.41	0.326938	0.336188	0.847059	#REF!	#REF!	#REF!					83.3693	85.728	216
1195	1.70883	741.277	0.317647	0.332988	0.827447	#REF!	#REF!	#REF!					81	84.912	210.999
1196	1.70683	742.146	0.315231	0.328988	0.8	#REF!	#REF!	#REF!					80.3838	83.892	204
1197	1.70483	743.017	0.311945	0.329412	0.796737	#REF!	#REF!	#REF!					79.5461	84	203.168
1198	1.70283	743.89	0.316463	0.329031	0.792157	#REF!	#REF!	#REF!					80.698	83.903	202
1199	1.70083	744.766	0.322367	0.331231	0.788902	#REF!	#REF!	#REF!					82.2035	84.464	201.17
1200	1.69883	745.643	0.322261	0.333416	0.784314	#REF!	#REF!	#REF!					82.1766	85.021	200
1201	1.69683	746.522	0.322757	0.3298	0.774576	#REF!	#REF!	#REF!					82.3031	84.099	197.517
1202	1.69483	747.404	0.319667	0.330271	0.760784	#REF!	#REF!	#REF!					81.5151	84.219	194
1203	1.69283	748.287	0.314885	0.334953	0.755925	#REF!	#REF!	#REF!					80.2958	85.413	192.761
1204	1.69082	749.173	0.314782	0.336024	0.74902	#REF!	#REF!	#REF!					80.2694	85.686	191
1205	1.68882	750.06	0.314678	0.333427	0.747404	#REF!	#REF!	#REF!					80.243	85.024	190.588
1206	1.68682	750.95	0.312962	0.331749	0.745098	#REF!	#REF!	#REF!					79.8053	84.596	190
1207	1.68482	751.842	0.31055	0.331188	0.738651	#REF!	#REF!	#REF!					79.1903	84.453	188.356
1208	1.68282	752.736	0.314194	0.328906	0.729412	#REF!	#REF!	#REF!					80.1195	83.871	186
1209	1.68082	753.632	0.319266	0.32549	0.710122	#REF!	#REF!	#REF!					81.4129	83	181.081
1210	1.67882	754.53	0.319311	0.327773	0.682353	#REF!	#REF!	#REF!					81.4243	83.582	174
1211	1.67682	755.431	0.320236	0.333259	0.680749	#REF!	#REF!	#REF!					81.6603	84.981	173.591
1212	1.67482	756.333	0.314618	0.34011	0.678431	#REF!	#REF!	#REF!					80.2275	86.728	173
1213	1.67282	757.238	0.305882	0.343498	0.681631	#REF!	#REF!	#REF!					78	87.592	173.816
1214	1.67082	758.145	0.305892	0.33858	0.686275	#REF!	#REF!	#REF!					78.0024	86.338	175
1215	1.66881	759.054	0.305882	0.33471	0.67989	#REF!	#REF!	#REF!					78	85.351	173.372
1216	1.66681	759.965	0.3011	0.336212	0.670588	#REF!	#REF!	#REF!					76.7804	85.734	171
1217	1.66481	760.878	0.294118	0.338443	0.66422	#REF!	#REF!	#REF!					75	86.303	169.376
1218	1.66281	761.794	0.298889	0.337639	0.654902	#REF!	#REF!	#REF!					76.2167	86.098	167
1219	1.66081	762.712	0.305882	0.336318	0.654902	#REF!	#REF!	#REF!					78	85.761	167
1220	1.65881	763.632	0.309056	0.339337	0.654902	#REF!	#REF!	#REF!					78.8092	86.531	167
1221	1.65681	764.554	0.313725	0.348722	0.642224	#REF!	#REF!	#REF!					80	88.924	163.767
1222	1.65481	765.479	0.31056	0.354722	0.623529	#REF!	#REF!	#REF!					79.1928	90.454	159
1223	1.65281	766.405	0.305882	0.35222	0.62511	#REF!	#REF!	#REF!					78	89.816	159.403
1224	1.65081	767.334	0.307461	0.35238	0.627451	#REF!	#REF!	#REF!					78.4026	89.857	160
1225	1.6488	768.266	0.309804	0.35602	0.619565	#REF!	#REF!	#REF!					79	90.785	157.989
1226	1.6468	769.199	0.305078	0.356475	0.607843	#REF!	#REF!	#REF!					77.795	90.901	155
1227	1.6448	770.135	0.298039	0.358529	0.587392	#REF!	#REF!	#REF!					76	91.425	149.785
1228	1.6428	771.073	0.301182	0.360918	0.556863	#REF!	#REF!	#REF!					76.8014	92.034	142
1229	1.6408	772.013	0.305882	0.360808	0.56942	#REF!	#REF!	#REF!					78	92.006	145.202
1230	1.6388	772.956	0.302747	0.362467	0.588004	#REF!	#REF!	#REF!					77.2006	92.429	149.941
1231	1.6368	773.901	0.298039	0.367961	0.579976	#REF!	#REF!	#REF!					76	93.83	147.894
1232	1.6348	774.848	0.296476	0.3722	0.56838	#REF!	#REF!	#REF!					75.6013	94.911	144.937
1233	1.6328	775.798	0.294118	0.370573	0.568145	#REF!	#REF!	#REF!					75	94.496	144.877
1234	1.6308	776.749	0.292558	0.371749	0.567745	#REF!	#REF!	#REF!					74.6022	94.796	144.775
1235	1.62879	777.704	0.290196	0.373569	0.559765	#REF!	#REF!	#REF!					74	95.26	142.74
1236	1.62679	778.66	0.290196	0.370565	0.547757	#REF!	#REF!	#REF!					74	94.494	139.678
1237	1.62479	779.619	0.290196	0.375369	0.541635	#REF!	#REF!	#REF!					74	95.719	138.117
1238	1.62279	780.581	0.291748	0.378016	0.53251	#REF!	#REF!	#REF!					74.3958	96.394	135.79
1239	1.62079	781.544	0.294118	0.377827	0.529678	#REF!	#REF!	#REF!					75	96.346	135.068
1240	1.61879	782.51	0.281731	0.386051	0.52549	#REF!	#REF!	#REF!					71.8414	98.443	134
1241	1.61679	783.479	0.262745	0.394812	0.521082	#REF!	#REF!	#REF!					67	100.677	132.876
1242	1.61479	784.45	0.270468	0.396808	0.514031	#REF!	#REF!	#REF!					68.9693	101.186	131.078
1243	1.61279	785.423	0.282353	0.398651	0.512718	#REF!	#REF!	#REF!					72	101.656	130.743
1244	1.61079	786.399	0.280812	0.405604	0.510663	#REF!	#REF!	#REF!					71.6071	103.429	130.219
1245	1.60878	787.377	0.278431	0.409537	0.497137	#REF!	#REF!	#REF!					71	104.432	126.77
1246	1.60678	788.357	0.279968	0.406529	0.476843	#REF!	#REF!	#REF!					71.3919	103.665	121.595
1247	1.60478	789.34	0.282353	0.403584	0.483545	#REF!	#REF!	#REF!					72	102.914	123.304
1248	1.60278	790.326	0.276221	0.407682	0.494118	#REF!	#REF!	#REF!					70.4363	103.959	126
1249	1.60078	791.314	0.266667	0.412976	0.484133	#REF!	#REF!	#REF!					68	105.309	123.454
1250	1.59878	792.304	0.271254	0.411745	0.468639	#REF!	#REF!	#REF!					69.1698	104.995	119.503
1251	1.59678	793.297	0.278431	0.412439	0.465761	#REF!	#REF!	#REF!					71	105.172	118.769
1252	1.59478	794.292	0.275381	0.415451	0.461388	#REF!	#REF!	#REF!					70.2221	105.94	117.654
1253	1.59278	795.29	0.270847	0.419882	0.458816	#REF!	#REF!	#REF!					69.0659	107.07	116.998
1254	1.59078	796.29	0.276728	0.424263	0.454114	#REF!	#REF!	#REF!					70.5657	108.187	115.799
1255	1.58878	797.293	0.285103	0.428373	0.452592	#REF!	#REF!	#REF!					72.7013	109.235	115.411
1256	1.58677	798.299	0.279845	0.433424	0.450773	#REF!	#REF!	#REF!					71.3606	110.523	114.947
1257	1.58477	799.307	0.272586	0.438616	0.443945	#REF!	#REF!	#REF!					69.5095	111.847	113.206
1258	1.58277	800.317	0.274281	0.441953	0.432557	#REF!	#REF!	#REF!					69.9416	112.698	110.302
1259	1.58077	801.33	0.276629	0.442467	0.437251	#REF!	#REF!	#REF!					70.5403	112.829	111.499
1260	1.57877	802.346	0.27689	0.443137	0.445071	#REF!	#REF!	#REF!					70.6069	113	113.493
1261	1.57677	803.364	0.276605	0.443827	0.433416	#REF!	#REF!	#REF!					70.5344	113.176	110.521
1262	1.57477	804.385	0.271935	0.447753	0.414169	#REF!	#REF!	#REF!					69.3435	114.177	105.613
1263	1.57277	805.408	0.264984	0.454859	0.416498	#REF!	#REF!	#REF!					67.571	115.989	106.207
1264	1.57077	806.434	0.264626	0.458824	0.421086	#REF!	#REF!	#REF!					67.4796	117	107.377
1265	1.56877	807.463	0.264129	0.459416	0.417165	#REF!	#REF!	#REF!					67.3529	117.151	106.377
1266	1.56676	808.494	0.265495	0.46158	0.410506	#REF!	#REF!	#REF!					67.7011	117.703	104.679
1267	1.56476	809.528	0.267344	0.466463	0.410671	#REF!	#REF!	#REF!					68.1728	118.948	104.721
1268	1.56276	810.564	0.266654	0.47231	0.410855	#REF!	#REF!	#REF!					67.9968	120.439	104.768
1269	1.56076	811.604	0.264927	0.474592	0.40258	#REF!	#REF!	#REF!					67.5564	121.021	102.658
1270	1.55876	812.645	0.262453	0.474494	0.38831	#REF!	#REF!	#REF!					66.9255	120.996	99.019
1271	1.55676	813.69	0.258795	0.477549	0.386745	#REF!	#REF!	#REF!					65.9927	121.775	98.62
1272	1.55476	814.737	0.258157	0.485424	0.384314	#REF!	#REF!	#REF!					65.83	123.783	98
1273	1.55276	815.787	0.256671	0.493165	0.384314	#REF!	#REF!	#REF!					65.451	125.757	98
1274	1.55076	816.84	0.260205	0.499522	0.384314	#REF!	#REF!	#REF!					66.3522	127.378	98
1275	1.54876	817.895	0.266701	0.497518	0.391722	#REF!	#REF!	#REF!					68.0088	126.867	99.889
1276	1.54675	818.953	0.260163	0.492082	0.403922	#REF!	#REF!	#REF!					66.3415	125.481	103
1277	1.54475	820.014	0.248414	0.501294	0.403922	#REF!	#REF!	#REF!					63.3455	127.83	103
1278	1.54275	821.078	0.253742	0.510988	0.403922	#REF!	#REF!	#REF!					64.7042	130.302	103
1279	1.54075	822.144	0.262745	0.513576	0.396553	#REF!	#REF!	#REF!					67	130.962	101.121
1280	1.53875	823.213	0.260489	0.52229	0.384314	#REF!	#REF!	#REF!					66.4247	133.184	98
1281	1.53675	824.285	0.25694	0.526925	0.384314	#REF!	#REF!	#REF!					65.5198	134.366	98
1282	1.53475	825.36	0.255365	0.523741	0.384314	#REF!	#REF!	#REF!					65.1181	133.554	98
1283	1.53275	826.437	0.252697	0.522776	0.387247	#REF!	#REF!	#REF!					64.4378	133.308	98.748
1284	1.53075	827.517	0.252771	0.525314	0.392157	#REF!	#REF!	#REF!					64.4567	133.955	100
1285	1.52875	828.601	0.252789	0.530875	0.39362	#REF!	#REF!	#REF!					64.4612	135.373	100.373
1286	1.52674	829.687	0.250756	0.534792	0.396078	#REF!	#REF!	#REF!					63.9429	136.372	101
1287	1.52474	830.775	0.246737	0.532878	0.387329	#REF!	#REF!	#REF!					62.918	135.884	98.769
1288	1.52274	831.867	0.247165	0.524455	0.372549	#REF!	#REF!	#REF!					63.027	133.736	95
1289	1.52074	832.962	0.247403	0.525902	0.372549	#REF!	#REF!	#REF!					63.0878	134.105	95
1290	1.51874	834.059	0.248525	0.533965	0.372549	#REF!	#REF!	#REF!					63.3738	136.161	95
1291	1.51674	835.159	0.25098	0.546533	0.375451	#REF!	#REF!	#REF!					64	139.366	95.74
1292	1.51474	836.263	0.25098	0.559204	0.380392	#REF!	#REF!	#REF!					64	142.597	97
1293	1.51274	837.369	0.25098	0.556133	0.384733	#REF!	#REF!	#REF!					64	141.814	98.107
1294	1.51074	838.478	0.248091	0.550447	0.392157	#REF!	#REF!	#REF!					63.2631	140.364	100
1295	1.50874	839.59	0.243137	0.553349	0.389271	#REF!	#REF!	#REF!					62	141.104	99.264
1296	1.50673	840.705	0.244578	0.562224	0.384314	#REF!	#REF!	#REF!					62.3675	143.367	98
1297	1.50473	841.823	0.247059	0.564706	0.382875	#REF!	#REF!	#REF!					63	144	97.633
1298	1.50273	842.944	0.245622	0.564737	0.380392	#REF!	#REF!	#REF!					62.6335	144.008	97
1299	1.50073	844.068	0.243137	0.565078	0.380392	#REF!	#REF!	#REF!					62	144.095	97
1300	1.49873	845.195	0.246004	0.565522	0.380392	#REF!	#REF!	#REF!					62.7311	144.208	97
1301	1.49673	846.325	0.25098	0.569992	0.380392	#REF!	#REF!	#REF!					64	145.348	97
1302	1.49473	847.458	0.249551	0.58178	0.380392	#REF!	#REF!	#REF!					63.6354	148.354	97
1303	1.49273	848.594	0.247059	0.590047	0.384675	#REF!	#REF!	#REF!					63	150.462	98.092
1304	1.49073	849.733	0.244207	0.591663	0.392157	#REF!	#REF!	#REF!					62.2728	150.874	100
1305	1.48873	850.875	0.239216	0.593643	0.396427	#REF!	#REF!	#REF!					61	151.379	101.089
1306	1.48673	852.02	0.240638	0.590506	0.403922	#REF!	#REF!	#REF!					61.3626	150.579	103
1307	1.48472	853.168	0.243137	0.585733	0.403922	#REF!	#REF!	#REF!					62	149.362	103
1308	1.48272	854.32	0.240301	0.589769	0.403922	#REF!	#REF!	#REF!					61.2767	150.391	103
1309	1.48072	855.474	0.235294	0.592384	0.405337	#REF!	#REF!	#REF!					60	151.058	103.361
1310	1.47872	856.632	0.236709	0.596247	0.407843	#REF!	#REF!	#REF!					60.3607	152.043	104
1311	1.47672	857.792	0.239216	0.602337	0.402192	#REF!	#REF!	#REF!					61	153.596	102.559
1312	1.47472	858.956	0.243447	0.597302	0.3924	#REF!	#REF!	#REF!					62.0791	152.312	100.062
1313	1.47272	860.123	0.25098	0.592416	0.399659	#REF!	#REF!	#REF!					64	151.066	101.913
1314	1.47072	861.294	0.243947	0.596537	0.412016	#REF!	#REF!	#REF!					62.2064	152.117	105.064
1315	1.46872	862.467	0.231373	0.605325	0.416451	#REF!	#REF!	#REF!					59	154.358	106.195
1316	1.46672	863.644	0.235581	0.609247	0.424416	#REF!	#REF!	#REF!					60.0732	155.358	108.226
1317	1.46471	864.824	0.243137	0.610557	0.431612	#REF!	#REF!	#REF!					62	155.692	110.061
1318	1.46271	866.007	0.243137	0.608478	0.444408	#REF!	#REF!	#REF!					62	155.162	113.324
1319	1.46071	867.193	0.243137	0.607698	0.444859	#REF!	#REF!	#REF!					62	154.963	113.439
1320	1.45871	868.382	0.241742	0.599722	0.44562	#REF!	#REF!	#REF!					61.6442	152.929	113.633
1321	1.45671	869.575	0.239216	0.589478	0.446969	#REF!	#REF!	#REF!					61	150.317	113.977
1322	1.45471	870.771	0.24339	0.596329	0.449094	#REF!	#REF!	#REF!					62.0644	152.064	114.519
1323	1.45271	871.971	0.25098	0.602925	0.452459	#REF!	#REF!	#REF!					64	153.746	115.377
1324	1.45071	873.174	0.246818	0.602596	0.458529	#REF!	#REF!	#REF!					62.9385	153.662	116.925
1325	1.44871	874.38	0.239216	0.605227	0.463439	#REF!	#REF!	#REF!					61	154.333	118.177
1326	1.44671	875.589	0.236448	0.602557	0.471988	#REF!	#REF!	#REF!					60.2943	153.652	120.357
1327	1.4447	876.802	0.231373	0.602247	0.471757	#REF!	#REF!	#REF!					59	153.573	120.298
1328	1.4427	878.018	0.232753	0.612408	0.471443	#REF!	#REF!	#REF!					59.3519	156.164	120.218
1329	1.4407	879.237	0.235587	0.613553	0.475271	#REF!	#REF!	#REF!					60.0747	156.456	121.194
1330	1.4387	880.46	0.238508	0.608961	0.482	#REF!	#REF!	#REF!					60.8196	155.285	122.91
1331	1.4367	881.686	0.243442	0.605353	0.491035	#REF!	#REF!	#REF!					62.0776	154.365	125.214
1332	1.4347	882.916	0.24326	0.604604	0.507914	#REF!	#REF!	#REF!					62.0312	154.174	129.518
1333	1.4327	884.149	0.242626	0.605204	0.510255	#REF!	#REF!	#REF!					61.8697	154.327	130.115
1334	1.4307	885.386	0.245474	0.604333	0.513725	#REF!	#REF!	#REF!					62.5959	154.105	131
1335	1.4287	886.626	0.25098	0.605471	0.517247	#REF!	#REF!	#REF!					64	154.395	131.898
1336	1.4267	887.869	0.247744	0.603776	0.523925	#REF!	#REF!	#REF!					63.1746	153.963	133.601
1337	1.42469	889.116	0.241989	0.597545	0.528796	#REF!	#REF!	#REF!					61.7072	152.374	134.843
1338	1.42269	890.367	0.243237	0.598812	0.538235	#REF!	#REF!	#REF!					62.0255	152.697	137.25
1339	1.42069	891.621	0.244796	0.601718	0.545004	#REF!	#REF!	#REF!					62.4231	153.438	138.976
1340	1.41869	892.878	0.242228	0.59829	0.556863	#REF!	#REF!	#REF!					61.7681	152.564	142
1341	1.41669	894.14	0.23797	0.591239	0.560639	#REF!	#REF!	#REF!					60.6823	150.766	142.963
1342	1.41469	895.404	0.240883	0.598522	0.568553	#REF!	#REF!	#REF!					61.4251	152.623	144.981
1343	1.41269	896.673	0.246226	0.607424	0.576384	#REF!	#REF!	#REF!					62.7877	154.893	146.978
1344	1.41069	897.944	0.245515	0.604651	0.59049	#REF!	#REF!	#REF!					62.6062	154.186	150.575
1345	1.40869	899.22	0.243556	0.601576	0.587702	#REF!	#REF!	#REF!					62.1069	153.402	149.864
1346	1.40669	900.499	0.247313	0.590549	0.581	#REF!	#REF!	#REF!					63.0649	150.59	148.155
1347	1.40469	901.782	0.254902	0.5846	0.589784	#REF!	#REF!	#REF!					65	149.073	150.395
1348	1.40268	903.068	0.254059	0.588651	0.607012	#REF!	#REF!	#REF!					64.7851	150.106	154.788
1349	1.40068	904.358	0.251922	0.587106	0.613247	#REF!	#REF!	#REF!					64.2401	149.712	156.378
1350	1.39868	905.652	0.25126	0.585651	0.625659	#REF!	#REF!	#REF!					64.0714	149.341	159.543
1351	1.39668	906.95	0.25098	0.588365	0.624102	#REF!	#REF!	#REF!					64	150.033	159.146
1352	1.39468	908.251	0.255475	0.585675	0.619608	#REF!	#REF!	#REF!					65.146	149.347	158
1353	1.39268	909.556	0.264089	0.580392	0.628933	#REF!	#REF!	#REF!					67.3426	148	160.378
1354	1.39068	910.864	0.259574	0.579063	0.647059	#REF!	#REF!	#REF!					66.1914	147.661	165
1355	1.38868	912.177	0.25098	0.5778	0.651043	#REF!	#REF!	#REF!					64	147.339	166.016
1356	1.38668	913.493	0.252584	0.5816	0.658824	#REF!	#REF!	#REF!					64.409	148.308	168
1357	1.38468	914.813	0.256033	0.582545	0.672067	#REF!	#REF!	#REF!					65.2884	148.549	171.377
1358	1.38267	916.137	0.257944	0.577937	0.698039	#REF!	#REF!	#REF!					65.7758	147.374	178
1359	1.38067	917.465	0.261298	0.573357	0.6954	#REF!	#REF!	#REF!					66.631	146.206	177.327
1360	1.37867	918.797	0.260603	0.57082	0.690196	#REF!	#REF!	#REF!					66.4538	145.559	176
1361	1.37667	920.132	0.258824	0.565506	0.698098	#REF!	#REF!	#REF!					66	144.204	178.015
1362	1.37467	921.471	0.257786	0.559102	0.713725	#REF!	#REF!	#REF!					65.7354	142.571	182
1363	1.37267	922.815	0.255522	0.563118	0.721604	#REF!	#REF!	#REF!					65.1581	143.595	184.009
1364	1.37067	924.162	0.253866	0.561325	0.737255	#REF!	#REF!	#REF!					64.7359	143.138	188
1365	1.36867	925.513	0.25098	0.551345	0.737255	#REF!	#REF!	#REF!					64	140.593	188
1366	1.36667	926.868	0.252287	0.552071	0.737255	#REF!	#REF!	#REF!					64.3333	140.778	188
1367	1.36467	928.227	0.254902	0.559282	0.738561	#REF!	#REF!	#REF!					65	142.617	188.333
1368	1.36266	929.59	0.256205	0.557988	0.741176	#REF!	#REF!	#REF!					65.3324	142.287	189
1369	1.36066	930.957	0.258824	0.54618	0.747682	#REF!	#REF!	#REF!					66	139.276	190.659
1370	1.35866	932.328	0.264022	0.536875	0.760784	#REF!	#REF!	#REF!					67.3255	136.903	194
1371	1.35666	933.703	0.27451	0.534522	0.772463	#REF!	#REF!	#REF!					70	136.303	196.978
1372	1.35466	935.082	0.273214	0.531506	0.796078	#REF!	#REF!	#REF!					69.6696	135.534	203
1373	1.35266	936.466	0.270588	0.531388	0.79349	#REF!	#REF!	#REF!					69	135.504	202.34
1374	1.35066	937.853	0.268004	0.52829	0.788235	#REF!	#REF!	#REF!					68.3411	134.714	201
1375	1.34866	939.245	0.262745	0.520694	0.788235	#REF!	#REF!	#REF!					67	132.777	201
1376	1.34666	940.64	0.264033	0.519886	0.788235	#REF!	#REF!	#REF!					67.3285	132.571	201
1377	1.34466	942.04	0.266667	0.521843	0.795953	#REF!	#REF!	#REF!					68	133.07	202.968
1378	1.34265	943.444	0.269235	0.513498	0.811765	#REF!	#REF!	#REF!					68.655	130.942	207
1379	1.34065	944.852	0.27451	0.505808	0.820741	#REF!	#REF!	#REF!					70	128.981	209.289
1380	1.33865	946.264	0.27451	0.515008	0.839216	#REF!	#REF!	#REF!					70	131.327	214
1381	1.33665	947.681	0.27451	0.512533	0.837937	#REF!	#REF!	#REF!					70	130.696	213.674
1382	1.33465	949.102	0.275786	0.499408	0.835294	#REF!	#REF!	#REF!					70.3255	127.349	213
1383	1.33265	950.527	0.278431	0.494439	0.840392	#REF!	#REF!	#REF!					71	126.082	214.3
1384	1.33065	951.956	0.283522	0.494722	0.85098	#REF!	#REF!	#REF!					72.2982	126.154	217
1385	1.32865	953.39	0.294118	0.491576	0.854792	#REF!	#REF!	#REF!					75	125.352	217.972
1386	1.32665	954.828	0.283966	0.482694	0.862745	#REF!	#REF!	#REF!					72.4114	123.087	220
1387	1.32465	956.27	0.262745	0.47258	0.866545	#REF!	#REF!	#REF!					67	120.508	220.969
1388	1.32265	957.717	0.267805	0.470643	0.87451	#REF!	#REF!	#REF!					68.2904	120.014	223
1389	1.32064	959.168	0.278431	0.480678	0.868192	#REF!	#REF!	#REF!					71	122.573	221.389
1390	1.31864	960.623	0.278431	0.485012	0.854902	#REF!	#REF!	#REF!					71	123.678	218
1391	1.31664	962.083	0.278431	0.481024	0.866235	#REF!	#REF!	#REF!					71	122.661	220.89
1392	1.31464	963.548	0.275916	0.474533	0.890196	#REF!	#REF!	#REF!					70.3587	121.006	227
1393	1.31264	965.016	0.270588	0.462871	0.896475	#REF!	#REF!	#REF!					69	118.032	228.601
1394	1.31064	966.49	0.274349	0.454969	0.909804	#REF!	#REF!	#REF!					69.959	116.017	232
1395	1.30864	967.968	0.282353	0.45371	0.908706	#REF!	#REF!	#REF!					72	115.696	231.72
1396	1.30664	969.45	0.281103	0.450725	0.906651	#REF!	#REF!	#REF!					71.6813	114.935	231.196
1397	1.30464	970.937	0.278431	0.451988	0.908298	#REF!	#REF!	#REF!					71	115.257	231.616
1398	1.30264	972.428	0.277185	0.454902	0.911596	#REF!	#REF!	#REF!					70.6823	116	232.457
1399	1.30063	973.924	0.27451	0.452416	0.922867	#REF!	#REF!	#REF!					70	115.366	235.331
1400	1.29863	975.425	0.283205	0.443333	0.945824	#REF!	#REF!	#REF!					72.2172	113.05	241.185
1401	1.29663	976.93	0.301961	0.434286	0.933639	#REF!	#REF!	#REF!					77	110.743	238.078
1402	1.29463	978.44	0.297007	0.429725	0.909667	#REF!	#REF!	#REF!					75.7369	109.58	231.965
1403	1.29263	979.955	0.286275	0.426051	0.915078	#REF!	#REF!	#REF!					73	108.643	233.345
1404	1.29063	981.474	0.285045	0.429651	0.924969	#REF!	#REF!	#REF!					72.6866	109.561	235.867
1405	1.28863	982.998	0.28268	0.428141	0.932725	#REF!	#REF!	#REF!					72.0835	109.176	237.845
1406	1.28663	984.527	0.286349	0.425612	0.946875	#REF!	#REF!	#REF!					73.019	108.531	241.453
1407	1.28463	986.06	0.293486	0.428427	0.954176	#REF!	#REF!	#REF!					74.8389	109.249	243.315
1408	1.28263	987.599	0.29534	0.422039	0.970851	#REF!	#REF!	#REF!					75.3116	107.62	247.567
1409	1.28062	989.142	0.299348	0.415686	0.962651	#REF!	#REF!	#REF!					76.3338	106	245.476
1410	1.27862	990.69	0.297556	0.414463	0.944961	#REF!	#REF!	#REF!					75.8769	105.688	240.965
1411	1.27662	992.243	0.294847	0.411239	0.948698	#REF!	#REF!	#REF!					75.1859	104.866	241.918
1412	1.27462	993.8	0.292771	0.411753	0.958302	#REF!	#REF!	#REF!					74.6565	104.997	244.367
1413	1.27262	995.363	0.288146	0.413835	0.960345	#REF!	#REF!	#REF!					73.4773	105.528	244.888
1414	1.27062	996.93	0.290462	0.408608	0.964816	#REF!	#REF!	#REF!					74.0677	104.195	246.028
1415	1.26862	998.503	0.29526	0.405996	0.959612	#REF!	#REF!	#REF!					75.2914	103.529	244.701
1416	1.26662	1000.08	0.29619	0.403671	0.946431	#REF!	#REF!	#REF!					75.5285	102.936	241.34
1417	1.26462	1001.66	0.298039	0.397647	0.947541	#REF!	#REF!	#REF!					76	101.4	241.623
1418	1.26262	1003.25	0.294864	0.398494	0.95058	#REF!	#REF!	#REF!					75.1902	101.616	242.398
1419	1.26061	1004.84	0.287831	0.402718	0.954263	#REF!	#REF!	#REF!					73.3968	102.693	243.337
1420	1.25861	1006.44	0.290342	0.396388	0.963153	#REF!	#REF!	#REF!					74.0371	101.079	245.604
1421	1.25661	1008.04	0.29588	0.389435	0.951125	#REF!	#REF!	#REF!					75.4495	99.306	242.537
1422	1.25461	1009.65	0.293642	0.394557	0.923525	#REF!	#REF!	#REF!					74.8786	100.612	235.499
1423	1.25261	1011.26	0.288227	0.397275	0.93078	#REF!	#REF!	#REF!					73.4978	101.305	237.349
1424	1.25061	1012.88	0.292771	0.390275	0.946082	#REF!	#REF!	#REF!					74.6567	99.52	241.251
1425	1.24861	1014.5	0.302845	0.388506	0.943871	#REF!	#REF!	#REF!					77.2255	99.069	240.687
1426	1.24661	1016.13	0.302716	0.386643	0.938843	#REF!	#REF!	#REF!					77.1925	98.594	239.405
1427	1.24461	1017.77	0.3035	0.383259	0.937039	#REF!	#REF!	#REF!					77.3924	97.731	238.945
1428	1.24261	1019.41	0.302091	0.388235	0.933333	#REF!	#REF!	#REF!					77.0332	99	238
1429	1.24061	1021.05	0.299296	0.388235	0.930961	#REF!	#REF!	#REF!					76.3206	99	237.395
1430	1.2386	1022.7	0.300617	0.387051	0.92549	#REF!	#REF!	#REF!					76.6573	98.698	236
1431	1.2366	1024.35	0.303086	0.383322	0.92629	#REF!	#REF!	#REF!					77.287	97.747	236.204
1432	1.2346	1026.01	0.301494	0.383192	0.928529	#REF!	#REF!	#REF!					76.881	97.714	236.775
1433	1.2326	1027.68	0.298039	0.390694	0.921914	#REF!	#REF!	#REF!					76	99.627	235.088
1434	1.2306	1029.35	0.298284	0.39602	0.905824	#REF!	#REF!	#REF!					76.0624	100.985	230.985
1435	1.2286	1031.03	0.298751	0.393596	0.897655	#REF!	#REF!	#REF!					76.1815	100.367	228.902
1436	1.2266	1032.71	0.301257	0.386882	0.878431	#REF!	#REF!	#REF!					76.8206	98.655	224
1437	1.2246	1034.4	0.307783	0.383325	0.87609	#REF!	#REF!	#REF!					78.4846	97.748	223.403
1438	1.2226	1036.09	0.306217	0.378263	0.870588	#REF!	#REF!	#REF!					78.0853	96.457	222
1439	1.2206	1037.79	0.301662	0.375784	0.877592	#REF!	#REF!	#REF!					76.9239	95.825	223.786
1440	1.21859	1039.49	0.302815	0.382647	0.894118	#REF!	#REF!	#REF!					77.2178	97.575	228
1441	1.21659	1041.2	0.305607	0.383459	0.882482	#REF!	#REF!	#REF!					77.9297	97.782	225.033
1442	1.21459	1042.92	0.300074	0.379188	0.854902	#REF!	#REF!	#REF!					76.5188	96.693	218
1443	1.21259	1044.64	0.286275	0.380392	0.846784	#REF!	#REF!	#REF!					73	97	215.93
1444	1.21059	1046.36	0.287433	0.380118	0.827451	#REF!	#REF!	#REF!					73.2953	96.93	211
1445	1.20859	1048.1	0.290196	0.378514	0.832075	#REF!	#REF!	#REF!					74	96.521	212.179
1446	1.20659	1049.84	0.292504	0.377953	0.843137	#REF!	#REF!	#REF!					74.5886	96.378	215
1447	1.20459	1051.58	0.298039	0.384706	0.839682	#REF!	#REF!	#REF!					76	98.1	214.119
1448	1.20259	1053.33	0.298039	0.393306	0.831373	#REF!	#REF!	#REF!					76	100.293	212
1449	1.20059	1055.08	0.298039	0.396078	0.821039	#REF!	#REF!	#REF!					76	101	209.365
1450	1.19858	1056.85	0.295746	0.394663	0.796078	#REF!	#REF!	#REF!					75.4153	100.639	203
1451	1.19658	1058.61	0.290196	0.390286	0.794933	#REF!	#REF!	#REF!					74	99.523	202.708
1452	1.19458	1060.39	0.290196	0.389494	0.792157	#REF!	#REF!	#REF!					74	99.321	202
1453	1.19258	1062.17	0.290196	0.396227	0.788733	#REF!	#REF!	#REF!					74	101.038	201.127
1454	1.19058	1063.95	0.294751	0.403024	0.780392	#REF!	#REF!	#REF!					75.1615	102.771	199
1455	1.18858	1065.74	0.305882	0.405902	0.773573	#REF!	#REF!	#REF!					78	103.505	197.261
1456	1.18658	1067.54	0.300208	0.406467	0.756863	#REF!	#REF!	#REF!					76.553	103.649	193
1457	1.18458	1069.34	0.286275	0.409686	0.7478	#REF!	#REF!	#REF!					73	104.47	190.689
1458	1.18258	1071.15	0.284012	0.415071	0.72549	#REF!	#REF!	#REF!					72.4231	105.843	185
1459	1.18058	1072.97	0.278431	0.414882	0.723231	#REF!	#REF!	#REF!					71	105.795	184.424
1460	1.17857	1074.79	0.280686	0.416388	0.717647	#REF!	#REF!	#REF!					71.5749	106.179	183
1461	1.17657	1076.62	0.286275	0.421922	0.708643	#REF!	#REF!	#REF!					73	107.59	180.704
1462	1.17457	1078.45	0.288522	0.425671	0.686275	#REF!	#REF!	#REF!					73.573	108.546	175
1463	1.17257	1080.29	0.294118	0.427063	0.687396	#REF!	#REF!	#REF!					75	108.901	175.286
1464	1.17057	1082.14	0.292998	0.426216	0.690196	#REF!	#REF!	#REF!					74.7145	108.685	176
1465	1.16857	1083.99	0.290196	0.430671	0.682373	#REF!	#REF!	#REF!					74	109.821	174.005
1466	1.16657	1085.85	0.287964	0.434812	0.662745	#REF!	#REF!	#REF!					73.4309	110.877	169
1467	1.16457	1087.72	0.282353	0.430259	0.666086	#REF!	#REF!	#REF!					72	109.716	169.852
1468	1.16257	1089.59	0.285689	0.429478	0.67451	#REF!	#REF!	#REF!					72.8507	109.517	172
1469	1.16057	1091.47	0.294118	0.436745	0.663408	#REF!	#REF!	#REF!					75	111.37	169.169
1470	1.15857	1093.35	0.293009	0.442412	0.635294	#REF!	#REF!	#REF!					74.7174	112.815	162
1471	1.15656	1095.24	0.290196	0.443137	0.624231	#REF!	#REF!	#REF!					74	113	159.179
1472	1.15456	1097.14	0.285779	0.444243	0.596078	#REF!	#REF!	#REF!					72.8736	113.282	152
1473	1.15256	1099.05	0.27451	0.447122	0.600486	#REF!	#REF!	#REF!					70	114.016	153.124
1474	1.15056	1100.96	0.27561	0.448247	0.611765	#REF!	#REF!	#REF!					70.2806	114.303	156
1475	1.14856	1102.88	0.278431	0.45098	0.599682	#REF!	#REF!	#REF!					71	115	152.919
1476	1.14656	1104.8	0.271851	0.453243	0.568835	#REF!	#REF!	#REF!					69.3221	115.577	145.053
1477	1.14456	1106.73	0.254902	0.457941	0.564604	#REF!	#REF!	#REF!					65	116.775	143.974
1478	1.14256	1108.67	0.259273	0.455424	0.552941	#REF!	#REF!	#REF!					66.1147	116.133	141
1479	1.14056	1110.62	0.270588	0.458788	0.555918	#REF!	#REF!	#REF!					69	116.991	141.759
1480	1.13856	1112.57	0.269536	0.470384	0.563349	#REF!	#REF!	#REF!					68.7318	119.948	143.654
1481	1.13655	1114.53	0.266667	0.479129	0.557604	#REF!	#REF!	#REF!					68	122.178	142.189
1482	1.13455	1116.49	0.264682	0.478631	0.543749	#REF!	#REF!	#REF!					67.494	122.051	138.656
1483	1.13255	1118.46	0.259805	0.475376	0.539043	#REF!	#REF!	#REF!					66.2504	121.221	137.456
1484	1.13055	1120.44	0.261803	0.475839	0.525239	#REF!	#REF!	#REF!					66.7598	121.339	133.936
1485	1.12855	1122.43	0.266133	0.48358	0.525275	#REF!	#REF!	#REF!					67.8638	123.313	133.945
1486	1.12655	1124.42	0.265504	0.489169	0.526333	#REF!	#REF!	#REF!					67.7035	124.738	134.215
1487	1.12455	1126.42	0.263704	0.488769	0.516984	#REF!	#REF!	#REF!					67.2445	124.636	131.831
1488	1.12255	1128.43	0.264215	0.488835	0.493576	#REF!	#REF!	#REF!					67.3748	124.653	125.862
1489	1.12055	1130.45	0.266667	0.493282	0.493792	#REF!	#REF!	#REF!					68	125.787	125.917
1490	1.11855	1132.47	0.26424	0.498039	0.493318	#REF!	#REF!	#REF!					67.3813	127	125.796
1491	1.11654	1134.5	0.257669	0.497792	0.489525	#REF!	#REF!	#REF!					65.7057	126.937	124.829
1492	1.11454	1136.54	0.257143	0.500082	0.478588	#REF!	#REF!	#REF!					65.5715	127.521	122.04
1493	1.11254	1138.58	0.256424	0.508039	0.480878	#REF!	#REF!	#REF!					65.388	129.55	122.624
1494	1.11054	1140.63	0.254444	0.506278	0.485937	#REF!	#REF!	#REF!					64.8831	129.101	123.914
1495	1.10854	1142.69	0.24862	0.497933	0.480396	#REF!	#REF!	#REF!					63.3982	126.973	122.501
1496	1.10654	1144.76	0.252278	0.500157	0.464639	#REF!	#REF!	#REF!					64.3309	127.54	118.483
1497	1.10454	1146.83	0.260598	0.506443	0.464416	#REF!	#REF!	#REF!					66.4524	129.143	118.426
1498	1.10254	1148.91	0.258682	0.50911	0.464494	#REF!	#REF!	#REF!					65.9638	129.823	118.446
1499	1.10054	1151	0.252881	0.510855	0.462514	#REF!	#REF!	#REF!					64.4846	130.268	117.941
1500	1.09854	1153.1	0.25382	0.507439	0.456333	#REF!	#REF!	#REF!					64.7241	129.397	116.365
1501	1.09653	1155.2	0.257543	0.508271	0.457812	#REF!	#REF!	#REF!					65.6735	129.609	116.742
1502	1.09453	1157.31	0.257677	0.512408	0.465129	#REF!	#REF!	#REF!					65.7076	130.664	118.608
1503	1.09253	1159.43	0.257296	0.517055	0.464098	#REF!	#REF!	#REF!					65.6105	131.849	118.345
1504	1.09053	1161.56	0.255407	0.517776	0.4604	#REF!	#REF!	#REF!					65.1287	132.033	117.402
1505	1.08853	1163.7	0.2497	0.5166	0.460122	#REF!	#REF!	#REF!					63.6735	131.733	117.331
1506	1.08653	1165.84	0.248131	0.520529	0.458824	#REF!	#REF!	#REF!					63.2735	132.735	117
1507	1.08453	1167.99	0.244251	0.516608	0.460196	#REF!	#REF!	#REF!					62.284	131.735	117.35
1508	1.08253	1170.15	0.244649	0.515796	0.464294	#REF!	#REF!	#REF!					62.3856	131.528	118.395
1509	1.08053	1172.32	0.246152	0.522051	0.464882	#REF!	#REF!	#REF!					62.7687	133.123	118.545
1510	1.07853	1174.49	0.247498	0.525757	0.466396	#REF!	#REF!	#REF!					63.112	134.068	118.931
1511	1.07653	1176.67	0.25098	0.531059	0.461678	#REF!	#REF!	#REF!					64	135.42	117.728
1512	1.07452	1178.87	0.248925	0.526949	0.446651	#REF!	#REF!	#REF!					63.4758	134.372	113.896
1513	1.07252	1181.06	0.243137	0.519369	0.449208	#REF!	#REF!	#REF!					62	132.439	114.548
1514	1.07052	1183.27	0.243137	0.513941	0.455769	#REF!	#REF!	#REF!					62	131.055	116.221
1515	1.06852	1185.49	0.243137	0.513878	0.45529	#REF!	#REF!	#REF!					62	131.039	116.099
1516	1.06652	1187.71	0.239439	0.514796	0.454925	#REF!	#REF!	#REF!					61.057	131.273	116.006
1517	1.06452	1189.95	0.228094	0.516576	0.461012	#REF!	#REF!	#REF!					58.164	131.727	117.558
1518	1.06252	1192.19	0.229484	0.509745	0.478431	#REF!	#REF!	#REF!					58.5183	129.985	122
1519	1.06052	1194.44	0.235294	0.500525	0.483502	#REF!	#REF!	#REF!					60	127.634	123.293
1520	1.05852	1196.69	0.236307	0.506424	0.498039	#REF!	#REF!	#REF!					60.2582	129.138	127
1521	1.05652	1198.96	0.239216	0.507125	0.497027	#REF!	#REF!	#REF!					61	129.317	126.742
1522	1.05451	1201.23	0.241233	0.507706	0.494118	#REF!	#REF!	#REF!					61.5144	129.465	126
1523	1.05251	1203.52	0.247059	0.509804	0.498145	#REF!	#REF!	#REF!					63	130	127.027
1524	1.05051	1205.81	0.24304	0.508365	0.509804	#REF!	#REF!	#REF!					61.9751	129.633	130
1525	1.04851	1208.11	0.231373	0.501247	0.509804	#REF!	#REF!	#REF!					59	127.818	130
1526	1.04651	1210.42	0.238379	0.491584	0.509804	#REF!	#REF!	#REF!					60.7867	125.354	130
1527	1.04451	1212.74	0.258824	0.491196	0.518796	#REF!	#REF!	#REF!					66	125.255	132.293
1528	1.04251	1215.07	0.252841	0.492408	0.545098	#REF!	#REF!	#REF!					64.4744	125.564	139
1529	1.04051	1217.41	0.235294	0.48451	0.544102	#REF!	#REF!	#REF!					60	123.55	138.746
1530	1.03851	1219.75	0.237281	0.47682	0.541176	#REF!	#REF!	#REF!					60.5066	121.589	138
1531	1.03651	1222.11	0.243137	0.478494	0.544149	#REF!	#REF!	#REF!					62	122.016	138.758
1532	1.0345	1224.47	0.243137	0.473902	0.552941	#REF!	#REF!	#REF!					62	120.845	141
1533	1.0325	1226.84	0.243137	0.474569	0.554918	#REF!	#REF!	#REF!					62	121.015	141.504
1534	1.0305	1229.22	0.245109	0.479988	0.560784	#REF!	#REF!	#REF!					62.5027	122.397	143
1535	1.0285	1231.62	0.25098	0.471557	0.563737	#REF!	#REF!	#REF!					64	120.247	143.753
1536	1.0265	1234.02	0.249017	0.462816	0.572549	#REF!	#REF!	#REF!					63.4993	118.018	146
1537	1.0245	1236.43	0.243137	0.462165	0.577447	#REF!	#REF!	#REF!					62	117.852	147.249
1538	1.0225	1238.85	0.246071	0.461004	0.592157	#REF!	#REF!	#REF!					62.7482	117.556	151
1539	1.0205	1241.28	0.254902	0.461227	0.598012	#REF!	#REF!	#REF!					65	117.613	152.493
1540	1.0185	1243.71	0.254902	0.454039	0.615686	#REF!	#REF!	#REF!					65	115.78	157
1541	1.0165	1246.16	0.254902	0.446247	0.612769	#REF!	#REF!	#REF!					65	113.793	156.256
1542	1.01449	1248.62	0.251991	0.446302	0.603922	#REF!	#REF!	#REF!					64.2577	113.807	154
1543	1.01249	1251.09	0.243137	0.445122	0.613604	#REF!	#REF!	#REF!					62	113.506	156.469
1544	1.01049	1253.57	0.24507	0.437906	0.643137	#REF!	#REF!	#REF!					62.4929	111.666	164
1545	1.00849	1256.05	0.25098	0.432749	0.642173	#REF!	#REF!	#REF!					64	110.351	163.754
1546	1.00649	1258.55	0.249055	0.42811	0.639216	#REF!	#REF!	#REF!					63.509	109.168	163
1547	1.00449	1261.06	0.243137	0.422808	0.647863	#REF!	#REF!	#REF!					62	107.816	165.205
1548	1.00249	1263.57	0.244096	0.420059	0.67451	#REF!	#REF!	#REF!					62.2445	107.115	172
1549	1.00049	1266.1	0.247059	0.420733	0.670682	#REF!	#REF!	#REF!					63	107.287	171.024
1550	0.998487	1268.64	0.249924	0.426141	0.658824	#REF!	#REF!	#REF!					63.7306	108.666	168
1551	0.996486	1271.19	0.258824	0.42222	0.6674	#REF!	#REF!	#REF!					66	107.666	170.187
1552	0.994485	1273.74	0.256921	0.417016	0.694118	#REF!	#REF!	#REF!					65.5149	106.339	177
1553	0.992484	1276.31	0.25098	0.41771	0.696016	#REF!	#REF!	#REF!					64	106.516	177.484
1554	0.990483	1278.89	0.249085	0.409871	0.701961	#REF!	#REF!	#REF!					63.5168	104.517	179
1555	0.988482	1281.48	0.243137	0.403922	0.704796	#REF!	#REF!	#REF!					62	103	179.723
1556	0.986481	1284.08	0.242237	0.403894	0.713725	#REF!	#REF!	#REF!					61.7705	102.993	182
1557	0.98448	1286.69	0.239216	0.402016	0.711843	#REF!	#REF!	#REF!					61	102.514	181.52
1558	0.982479	1289.31	0.238558	0.395137	0.706027	#REF!	#REF!	#REF!					60.8323	100.76	180.037
[truncated: 491 more rows]
